# Supplementary material for: A Systems Genetics Approach Identifies CXCL14, ITGAX, and LPCAT2 as Novel Aggressive Prostate Cancer Susceptibility Genes
Source: PLoS Genet. 2014 Nov 20;10(11):e1004809. doi: 10.1371/journal.pgen.1004809 (PMC4238980; doi:10.1371/journal.pgen.1004809)
Supplement: Table S10 — Correlation analysis for the microarray expression level of transcripts located within the chromosome 4 seminal vesicle tumor burden QTL with seminal vesicle tumor burden. (XLSX) [file pgen.1004809.s015.xlsx]

## Sheet: SVTB Chr 4
Chromosome	Start	Stop	ID				ID		N183	N185	N187	N197	N259	N265	N266	N275	N293	N294	N314	N329	N340	N343	N369	N371	N372	N380	N566	N574	N582	N583	N585	N586	N590	N591	N592	N596	N609	N614	N615	N618	N619	N637	N641	N649	N655	N662	N663	N803	N812
							Seminal Vesicles Wt (g)		3.15	5.6	0.76	0.4	0.1	0.4	0.1	1.7	2.73	0.1	0.2	1.3	0.2	2.68	0.2	0.91	1.63	2.32	0.4	2.01	1.45	0.3	0.6	3.19	1.23	0.2	0.2	0.5	0.3	3.22	0.51	1.2	0.4	0.4	0.6	0.3	0.8	0.56	0.34	1	1.1
chr4	42028025	42033786	17412995	NR_033123 // 4933409K07Rik // RIKEN cDNA 4933409K07 gene // 4 A5|4 // 108816 /// NR_033	4933409K07Rik	NR_033123	NR_033123 // RefSeq // Mus musculus RIKEN cDNA 4933409K07 gene (4933409K07Rik), non-cod		8.19245	8.44228	9.30779	9.83557	9.65198	11.0098	8.74524	6.937	6.52972	9.12609	11.5303	8.96094	12.2284	6.80729	9.59177	8.1378	8.81838	9.37166	11.3154	7.84588	6.74236	10.7362	9.01253	6.78617	6.07524	9.23934	9.52659	8.85767	8.5681	6.90184	8.87434	8.72685	11.0775	7.41205	8.58335	9.32574	9.01697	9.23065	9.61436	9.0225	7.63846
chr4	42380236	42385997	17413100	NR_033123 // 4933409K07Rik // RIKEN cDNA 4933409K07 gene // 4 A5|4 // 108816 /// NR_033	4933409K07Rik	NR_033123	NR_033123 // RefSeq // Mus musculus RIKEN cDNA 4933409K07 gene (4933409K07Rik), non-cod		8.19245	8.44228	9.30779	9.83557	9.65198	11.0098	8.74524	6.937	6.52972	9.12609	11.5303	8.96094	12.2284	6.80729	9.59177	8.1378	8.81838	9.37166	11.3154	7.84588	6.74236	10.7362	9.01253	6.78617	6.07524	9.23934	9.52659	8.85767	8.5681	6.90184	8.87434	8.72685	11.0775	7.41205	8.58335	9.32574	9.01697	9.23065	9.61436	9.0225	7.63846
chr4	42460503	42466264	17424412	NR_033123 // 4933409K07Rik // RIKEN cDNA 4933409K07 gene // 4 A5|4 // 108816 /// NR_033	4933409K07Rik	NR_033123	NR_033123 // RefSeq // Mus musculus RIKEN cDNA 4933409K07 gene (4933409K07Rik), non-cod		8.2426	8.47863	9.34703	9.86822	9.66616	11.0116	8.75034	6.91724	6.52596	9.11387	11.5687	8.9584	12.2259	6.80348	9.66232	8.00803	8.81456	9.34863	11.3043	7.84314	6.72029	10.7344	9.01295	6.75807	6.05637	9.23113	9.49665	8.85542	8.57124	6.89198	8.87134	8.72378	11.0836	7.41019	8.58098	9.32193	8.97661	9.22836	9.58801	9.02605	7.59773
chr4	42712822	42717688	17424447	NR_033123 // 4933409K07Rik // RIKEN cDNA 4933409K07 gene // 4 A5|4 // 108816 /// NR_033	4933409K07Rik	NR_033123	NR_033123 // RefSeq // Mus musculus RIKEN cDNA 4933409K07 gene (4933409K07Rik), non-cod		7.99087	7.92652	8.69833	8.15616	8.54323	8.85938	8.0685	6.74519	5.85201	7.83689	9.23714	7.97801	9.37626	7.39348	7.9184	8.30566	8.40617	8.44293	8.73137	7.56467	5.99165	8.81673	7.62035	6.18302	6.96152	8.23047	7.74658	8.3104	8.56671	6.32662	7.98453	8.94439	8.86837	8.11666	7.97364	8.11769	8.01882	8.51617	7.88789	8.16414	8.25507
chr4	11331933	11386783	17423291	NM_194055 // Esrp1 // epithelial splicing regulatory protein 1 // 4 A1|4 // 207920 ///	Esrp1	NM_194055	NM_194055 // RefSeq // Mus musculus epithelial splicing regulatory protein 1 (Esrp1), m		8.82446	5.62684	4.76863	5.05123	4.4809	4.64601	5.0096	8.96679	9.00606	4.58196	4.63386	4.55295	4.6844	5.67011	4.86221	7.42599	4.70644	8.27875	4.58214	4.55757	9.29213	4.59272	6.75712	9.62108	6.86949	4.72476	4.75977	6.92437	4.58651	9.35589	4.67403	4.85451	4.66361	5.62218	7.41157	4.71667	4.7318	4.56721	4.74116	4.76932	4.73074
chr4	34566781	34614944	17423823	NM_015824 // Orc3 // origin recognition complex, subunit 3 // 4|4 A3 // 50793 /// NM_00	Orc3	NM_015824	NM_015824 // RefSeq // Mus musculus origin recognition complex, subunit 3 (Orc3), trans		8.42517	9.18991	9.38487	9.0531	9.05515	9.04253	9.42844	8.22431	8.44952	9.39593	9.31615	9.40297	9.42659	9.14401	8.9225	9.02439	9.26713	8.94235	9.4335	9.05686	8.30466	9.57253	9.39312	8.8705	9.34674	9.66586	9.58662	9.34079	9.39641	8.42116	9.465	9.25941	9.28133	9.10187	9.19272	9.50529	9.57032	9.37699	9.6512	9.39277	9.40191
chr4	45297127	45316131	17413633	ENSMUST00000044673 // Rg9mtd3 // RNA (guanine-9-) methyltransferase domain containing 3	Rg9mtd3	ENSMUST00000044673	ENSMUST00000044673 // ENSEMBL // cdna:known chromosome:NCBIM37:4:45309999:45329003:1 ge		7.6464	7.58279	8.06256	7.8028	7.72487	7.90474	8.20719	7.36672	7.44976	7.62247	7.92541	8.03949	7.86081	7.81275	7.86944	7.89597	7.9932	7.51068	7.89304	7.81426	7.62673	8.09908	7.69468	7.57837	8.17709	8.30233	8.17535	7.89033	8.44356	7.63502	8.09461	7.59837	7.99563	7.67881	7.87354	8.14153	7.9838	8.06643	7.99294	7.81896	8.14618
chr4	49443532	49473912	17425211	NM_001164565 // Acnat1 // acyl-coenzyme A amino acid N-acyltransferase 1 // 4 B1|4 // 2	Acnat1	NM_001164565	NM_001164565 // RefSeq // Mus musculus acyl-coenzyme A amino acid N-acyltransferase 1 (		3.9294	3.85146	3.62591	3.34349	4.07438	3.42773	3.60401	3.91115	4.49016	3.63493	3.61185	3.57384	3.50388	3.97539	3.37209	3.38551	3.78056	3.5724	3.6824	3.43792	4.59241	3.54766	3.484	3.91408	3.60912	3.46519	3.49509	3.8374	3.74798	4.73276	3.49621	3.52245	3.55691	3.69144	3.74439	3.50451	3.51013	3.62147	3.42104	3.61642	3.92385
chr4	42025516	42055130	17424360	NR_033123 // 4933409K07Rik // RIKEN cDNA 4933409K07 gene // 4 A5|4 // 108816 /// NR_033	4933409K07Rik	NR_033123	NR_033123 // RefSeq // Mus musculus RIKEN cDNA 4933409K07 gene (4933409K07Rik), non-cod		8.58875	8.86523	9.65419	9.38272	9.6364	9.65326	8.8287	6.99024	6.27946	8.50229	10.13	8.71724	10.3947	8.481	10.24	8.9757	9.14166	10.3102	9.78086	8.31873	6.59801	10.0596	8.66887	6.85242	7.75722	9.2443	8.93821	9.22969	8.53343	6.81454	8.89933	9.97401	9.67749	8.66711	9.44606	9.26651	9.2739	9.62809	8.91797	9.41389	9.23914
chr4	42318272	42324070	17413094	NM_001085530 // Gm13298 // predicted gene 13298 // 4 A5|4 // 545611	Gm13298	NM_001085530	NM_001085530 // RefSeq // Mus musculus predicted gene 13298 (Gm13298), mRNA. // chr4 //		7.62507	7.50647	8.05996	7.42995	8.11155	8.25203	7.56397	6.89402	6.26447	7.24516	8.668	7.63095	8.54639	7.07397	7.98355	7.35151	7.82182	7.95339	8.06952	7.13328	6.04034	8.05401	7.23814	6.17419	6.63497	7.62229	7.09985	7.61396	7.74905	6.85753	7.39838	8.27333	8.16869	7.49272	7.53053	7.60973	7.12859	7.98474	7.54168	7.45554	7.42158
chr4	42522439	42528237	17424415	NM_001085530 // Gm13298 // predicted gene 13298 // 4 A5|4 // 545611	Gm13298	NM_001085530	NM_001085530 // RefSeq // Mus musculus predicted gene 13298 (Gm13298), mRNA. // chr4 //		7.62507	7.50647	8.05996	7.42995	8.11155	8.25203	7.56397	6.89402	6.26447	7.24516	8.668	7.63095	8.54639	7.07397	7.98355	7.35151	7.82182	7.95339	8.06952	7.13328	6.04034	8.05401	7.23814	6.17419	6.63497	7.62229	7.09985	7.61396	7.74905	6.85753	7.39838	8.27333	8.16869	7.49272	7.53053	7.60973	7.12859	7.98474	7.54168	7.45554	7.42158
chr4	24612554	24851124	17423640	ENSMUST00000108218 // Klhl32 // kelch-like 32 (Drosophila) // 4 A3|4 7.9 cM // 212390 /	Klhl32	ENSMUST00000108218	ENSMUST00000108218 // ENSEMBL // cdna:known chromosome:NCBIM37:4:24539701:24778271:-1 g		6.40539	5.57395	6.27604	6.53489	6.5314	7.3316	7.11035	5.75197	5.24546	6.6605	6.99625	6.96767	7.40085	6.26633	7.41268	6.7528	7.04558	7.36471	7.63219	6.49314	6.01857	7.23378	5.68649	6.6113	6.07566	6.91938	7.39882	6.29148	6.8607	5.76457	7.41517	6.63996	6.77903	6.46751	7.41175	7.17621	7.36768	7.35713	7.14985	6.52727	7.36003
chr4	41966058	41971856	17412987	NM_001085530 // Gm13298 // predicted gene 13298 // 4 A5|4 // 545611	Gm13298	NM_001085530	NM_001085530 // RefSeq // Mus musculus predicted gene 13298 (Gm13298), mRNA. // chr4 //		7.09801	6.94053	7.43089	7.14077	7.55159	7.67237	7.07696	6.66864	5.96506	6.9643	8.05178	6.98779	7.71676	6.48013	6.89751	7.21748	7.20322	7.24031	7.47259	6.70796	5.7418	7.46202	6.6443	5.88282	6.30231	7.04143	6.51515	7.24624	7.70261	6.48296	6.84344	7.5697	7.53546	7.08343	6.89816	6.90779	6.45318	7.27184	7.04206	6.89827	6.83537
chr4	42377727	42380236	17424407	NR_033123 // 4933409K07Rik // RIKEN cDNA 4933409K07 gene // 4 A5|4 // 108816 /// NR_033	4933409K07Rik	NR_033123	NR_033123 // RefSeq // Mus musculus RIKEN cDNA 4933409K07 gene (4933409K07Rik), non-cod		8.89956	9.78054	10.3449	10.322	10.4414	10.2954	9.48655	7.17609	6.66579	9.07019	10.7835	9.36106	11.1672	8.91355	11.27	9.65449	9.76837	11.2558	10.4654	8.61865	6.50049	10.7862	9.33025	7.21122	8.19031	10.0066	9.81127	9.86076	8.97063	6.6992	9.50991	10.8215	10.467	9.21379	10.3101	10.0752	10.2544	10.2934	9.67266	10.1077	9.84134
chr4	42552478	42590260	17413107	NR_033123 // 4933409K07Rik // RIKEN cDNA 4933409K07 gene // 4 A5|4 // 108816 /// NR_033	4933409K07Rik	NR_033123	NR_033123 // RefSeq // Mus musculus RIKEN cDNA 4933409K07 gene (4933409K07Rik), non-cod		8.88491	9.34978	9.83821	9.65647	9.9429	9.82804	9.09631	7.71118	7.29666	8.98232	10.1281	8.90438	10.3875	8.73011	10.3619	9.34612	9.27516	10.3347	9.97294	8.5975	7.14149	9.72117	8.81543	7.60595	8.00448	9.37042	8.92378	9.35959	8.73283	7.27287	9.19171	10.1235	9.73553	9.08232	9.31837	9.39999	9.00584	9.70791	8.95591	9.56902	9.27942
chr4	41867667	41892837	17412952	NR_033506 // Gm3893 // predicted gene 3893 // 4 A5|4 // 100042539	Gm3893	NR_033506	NR_033506 // RefSeq // Mus musculus predicted gene 3893 (Gm3893), non-coding RNA. // ch		8.95666	9.53316	10.0055	9.69576	9.96214	10.1266	9.22998	7.15846	6.56153	8.95267	10.3862	9.1097	10.7306	9.06909	10.6933	9.7727	9.68038	10.2801	10.1173	8.54726	6.78077	10.3618	9.04177	7.13867	8.01147	9.57818	9.33113	9.49853	8.73553	6.86438	9.44125	10.3589	10.1826	9.092	9.9714	9.65139	9.80407	10.084	9.2985	9.61341	9.63329
chr4	41941572	41943124	17412979	ENSMUST00000108036 // Ccl27a // chemokine (C-C motif) ligand 27A // 4 A5|4 13.3 cM // 2	Ccl27a	ENSMUST00000108036	ENSMUST00000108036 // ENSEMBL // cdna:known chromosome:NCBIM37:4:41716340:41720970:-1 g		9.03816	8.59624	9.0073	9.47779	9.3613	8.81858	8.88402	7.88623	7.44801	8.66038	8.88002	9.50804	8.83276	8.50007	8.91068	9.1214	8.86204	9.55412	9.09506	8.84272	7.83553	9.26143	8.36122	7.67205	8.53463	9.72841	8.80706	9.08196	9.18683	7.51844	9.10552	9.2658	8.97931	8.39278	8.90591	8.98438	8.30652	9.17073	8.45929	9.29638	9.15141
chr4	42070757	42073398	17424373	NM_011888 // Ccl19 // chemokine (C-C motif) ligand 19 // 4 A5|4 // 24047 /// BC051472 /	Ccl19	NM_011888	NM_011888 // RefSeq // Mus musculus chemokine (C-C motif) ligand 19 (Ccl19), mRNA. // c		7.19457	7.14078	7.63489	7.69702	7.57212	8.01483	7.33969	7.1228	6.44528	7.4126	8.0979	7.67445	8.15899	7.06254	8.10898	6.73795	7.38046	7.77006	8.05787	7.05324	6.85809	8.13661	7.56935	6.6559	6.73306	7.75886	6.89631	7.32377	7.0582	6.63789	7.36989	7.80874	7.71207	6.86102	7.06921	7.06757	7.76551	7.82473	7.7759	7.55371	6.29217
chr4	42131994	42134171	17413033	NM_011888 // Ccl19 // chemokine (C-C motif) ligand 19 // 4 A5|4 // 24047 /// BC051472 /	Ccl19	NM_011888	NM_011888 // RefSeq // Mus musculus chemokine (C-C motif) ligand 19 (Ccl19), mRNA. // c		7.19044	6.97408	7.73305	7.66951	7.51613	7.92095	7.31102	6.91779	6.64474	7.342	8.12068	7.61692	8.28236	7.11764	8.28325	6.95194	7.41107	7.89132	8.02883	6.83458	6.80826	7.89024	7.61325	6.59721	6.71603	7.83429	6.93214	7.39736	7.02172	6.87184	7.39824	7.82596	7.63651	6.98493	6.80675	6.95214	7.67075	7.82008	7.75061	7.64768	6.82591
chr4	42629332	42631509	17413131	NM_011888 // Ccl19 // chemokine (C-C motif) ligand 19 // 4 A5|4 // 24047 /// BC051472 /	Ccl19	NM_011888	NM_011888 // RefSeq // Mus musculus chemokine (C-C motif) ligand 19 (Ccl19), mRNA. // c		7.19044	6.97408	7.73305	7.66951	7.51613	7.92095	7.31102	6.91779	6.64474	7.342	8.12068	7.61692	8.28236	7.11764	8.28325	6.95194	7.41107	7.89132	8.02883	6.83458	6.80826	7.89024	7.61325	6.59721	6.71603	7.83429	6.93214	7.39736	7.02172	6.87184	7.39824	7.82596	7.63651	6.98493	6.80675	6.95214	7.67075	7.82008	7.75061	7.64768	6.82591
chr4	42083365	42084291	17424381	---		---	ENSMUST00000098125 // ENSEMBL // cdna:known chromosome:NCBIM37:4:41954088:41955014:-1 g		6.10034	7.52847	7.79512	7.66458	7.67361	8.75603	7.35051	6.45614	5.9807	7.22037	9.46813	7.6902	10.0758	6.35914	7.31313	6.91543	7.46413	7.61194	8.60595	6.24912	6.05257	8.78509	7.42617	6.27304	5.92013	7.61502	6.96166	7.02257	6.74702	5.62602	7.29746	8.4762	8.73028	6.70998	6.84349	7.30229	7.74966	7.64205	7.82805	7.65976	6.93543
chr4	42580695	42581621	17424428	---		---	ENSMUST00000098125 // ENSEMBL // cdna:known chromosome:NCBIM37:4:41954088:41955014:-1 g		6.10034	7.52847	7.79512	7.66458	7.67361	8.75603	7.35051	6.45614	5.9807	7.22037	9.46813	7.6902	10.0758	6.35914	7.31313	6.91543	7.46413	7.61194	8.60595	6.24912	6.05257	8.78509	7.42617	6.27304	5.92013	7.61502	6.96166	7.02257	6.74702	5.62602	7.29746	8.4762	8.73028	6.70998	6.84349	7.30229	7.74966	7.64205	7.82805	7.65976	6.93543
chr4	41920842	41923020	17412973	NM_011888 // Ccl19 // chemokine (C-C motif) ligand 19 // 4 A5|4 // 24047 /// BC051472 /	Ccl19	NM_011888	NM_011888 // RefSeq // Mus musculus chemokine (C-C motif) ligand 19 (Ccl19), mRNA. // c		6.91914	6.72447	7.37791	7.42636	7.21183	7.6194	6.98365	6.61963	6.37766	7.04127	7.58437	7.30278	7.97916	6.81817	7.92384	6.66466	7.0958	7.58813	7.72564	6.57457	6.50671	7.56913	7.38018	6.29402	6.48747	7.40823	6.66768	7.14247	6.75124	6.57028	7.09669	7.50204	7.3388	6.71708	6.56057	6.64784	7.38135	7.53514	7.41615	7.34426	6.50739
chr4	42272931	42275109	17413084	NM_011888 // Ccl19 // chemokine (C-C motif) ligand 19 // 4 A5|4 // 24047 /// BC051472 /	Ccl19	NM_011888	NM_011888 // RefSeq // Mus musculus chemokine (C-C motif) ligand 19 (Ccl19), mRNA. // c		6.91914	6.72447	7.37791	7.42636	7.21183	7.6194	6.98365	6.61963	6.37766	7.04127	7.58437	7.30278	7.97916	6.81817	7.92384	6.66466	7.0958	7.58813	7.72564	6.57457	6.50671	7.56913	7.38018	6.29402	6.48747	7.40823	6.66768	7.14247	6.75124	6.57028	7.09669	7.50204	7.3388	6.71708	6.56057	6.64784	7.38135	7.53514	7.41615	7.34426	6.50739
chr4	16164110	16266227	17412001	NR_045765 // A530072M11Rik // RIKEN cDNA gene A530072M11 // --- // 100415915 /// NR_045	A530072M11Rik	NR_045765	NR_045765 // RefSeq // Mus musculus RIKEN cDNA gene A530072M11 (A530072M11Rik), non-cod		5.04517	4.94799	4.72885	4.38404	4.65512	4.60654	4.82526	5.10641	5.72308	4.38918	4.47062	4.52758	4.51873	4.51886	4.52614	5.09193	4.84123	4.83174	4.66978	4.49135	5.82797	4.88011	4.90349	5.13906	4.75229	4.60314	4.61717	4.66667	4.36777	5.86487	4.57754	4.47453	4.50156	4.38034	4.58772	4.57716	4.83911	4.52136	4.49523	4.5511	4.59862
chr4	42055152	42468773	17413000	NR_033123 // 4933409K07Rik // RIKEN cDNA 4933409K07 gene // 4 A5|4 // 108816 /// BC0590	4933409K07Rik	NR_033123	NR_033123 // RefSeq // Mus musculus RIKEN cDNA 4933409K07 gene (4933409K07Rik), non-cod		9.16641	9.72793	10.2016	9.99389	10.2253	10.2863	9.40603	7.43087	6.84515	9.12446	10.6475	9.31807	10.8565	9.02364	10.8571	9.68605	9.66835	10.9788	10.4083	8.75653	7.08066	10.4954	9.17912	7.39633	8.19969	9.81578	9.56827	9.74304	8.94113	7.28649	9.52463	10.5512	10.26	9.28048	10.0405	9.92022	9.93777	10.1499	9.39534	10.0036	9.77538
chr4	42206998	42242078	17413061	---		---	ENSMUST00000169242 // ENSEMBL // cdna:known chromosome:NCBIM37:4:42077721:42106036:1 ge		8.85787	9.1727	9.57387	9.83622	9.61768	9.64381	8.88114	7.08576	6.37008	8.51513	9.83476	9.01751	10.1833	8.97104	9.60362	9.41573	9.47479	9.73975	9.74101	8.27305	6.44121	9.94448	8.62726	6.90677	7.9348	9.10124	8.5645	8.84476	8.15524	6.91838	8.99062	10.1444	9.76084	8.66608	9.42967	9.28975	9.31388	9.54866	8.91512	9.19789	9.14549
chr4	42244362	42245525	17413075	BC059060 // Gm3893 // predicted gene 3893 // 4 A5|4 // 100042539 /// BC059060 // Gm3893	Gm3893	BC059060	BC059060 // GenBank // Mus musculus RIKEN cDNA 4933409K07 gene, mRNA (cDNA clone MGC:69		9.59187	10.2185	10.6457	10.6566	10.7128	10.8037	9.67075	7.75948	7.19481	9.41827	10.9924	9.7078	11.3644	9.40078	11.5731	10.1207	10.0717	11.5663	10.9589	9.11608	7.11185	10.9537	9.68226	7.81584	8.40755	10.2873	9.9605	10.284	9.08635	7.53258	9.82616	10.9385	10.7572	9.59638	10.8869	10.4104	10.4266	10.7193	9.87318	10.5392	10.2581
chr4	41791989	41794438	17424346	NM_011888 // Ccl19 // chemokine (C-C motif) ligand 19 // 4 A5|4 // 24047 /// BC051472 /	Ccl19	NM_011888	NM_011888 // RefSeq // Mus musculus chemokine (C-C motif) ligand 19 (Ccl19), mRNA. // c		7.36203	7.22625	7.96989	7.7969	7.73852	8.08921	7.43834	7.47921	6.81398	7.48951	8.04439	7.78613	8.37328	7.14466	8.2318	6.87776	7.56744	8.04257	8.16853	7.09721	7.05395	8.07429	7.77005	6.96115	6.98669	7.78983	7.41501	7.3489	7.25883	7.02625	7.62051	7.94239	7.99124	6.9567	7.64801	7.23458	7.82307	7.9101	7.86084	7.82866	6.73328
chr4	41893278	41942092	17424352	BC059060 // Gm3893 // predicted gene 3893 // 4 A5|4 // 100042539 /// NR_033506 // Gm389	Gm3893	BC059060	BC059060 // GenBank // Mus musculus RIKEN cDNA 4933409K07 gene, mRNA (cDNA clone MGC:69		6.39564	6.41468	5.8401	6.57197	6.93799	6.90523	6.7904	5.243	4.80417	6.9106	7.06072	6.56563	6.83049	5.01266	7.3364	6.08011	5.6277	8.03237	7.30244	6.06755	4.58512	6.84471	6.15901	5.41199	5.16913	7.1957	5.4681	7.06439	7.15616	5.07348	5.54373	6.96526	6.30945	6.09589	5.55491	5.39827	5.03397	6.43959	6.41033	6.62691	5.92274
chr4	42153436	42158846	17413039	NM_001199961 // Ccl27b // chemokine (C-C motif) ligand 27b // 4 A5|4 // 100040048 /// N	Ccl27b	NM_001199961	NM_001199961 // RefSeq // Mus musculus chemokine (C-C motif) ligand 27b (Ccl27b), trans		8.14691	7.94888	8.13435	8.37807	8.2326	7.57784	8.12133	7.11529	6.7872	7.70008	7.68886	8.64717	7.84226	7.84135	7.77427	8.34413	7.99643	8.41241	8.2424	7.93776	6.81653	8.27411	7.4008	7.02518	7.66679	8.77717	8.02053	8.41989	8.412	6.86314	8.36581	8.4184	8.04257	7.74586	8.14159	8.19087	7.6058	8.38213	7.84539	8.30641	8.33466
chr4	41883632	41884795	17412962	BC059060 // Gm3893 // predicted gene 3893 // 4 A5|4 // 100042539 /// BC059060 // Gm3893	Gm3893	BC059060	BC059060 // GenBank // Mus musculus RIKEN cDNA 4933409K07 gene, mRNA (cDNA clone MGC:69		9.54486	10.2343	10.6052	10.6108	10.6872	10.7542	9.66733	7.68922	7.16966	9.38053	10.9595	9.68657	11.3506	9.43086	11.5374	10.0858	10.033	11.5286	10.8944	9.05321	7.09222	10.9259	9.63841	7.79175	8.42475	10.2597	9.97049	10.2479	9.06205	7.51229	9.82061	10.9367	10.7321	9.57994	10.8632	10.3878	10.4007	10.6918	9.85029	10.5168	10.2297
chr4	42154592	42156397	17413054	NM_001164044 // Ccl27a // chemokine (C-C motif) ligand 27A // 4 A5|4 13.3 cM // 20301 /	Ccl27a	NM_001164044	NM_001164044 // RefSeq // Mus musculus chemokine (C-C motif) ligand 27A (Ccl27a), trans		8.58202	8.22202	8.80036	8.36325	9.08803	8.28584	8.67953	7.23493	6.99892	8.0825	8.29708	9.11266	8.58613	8.39958	7.81703	8.59176	8.49085	8.9821	8.68155	8.75126	7.37405	9.07581	7.63596	7.3599	8.42052	9.40996	8.83382	8.91078	8.90224	7.2717	9.00891	8.93044	8.70819	8.26171	8.63669	8.89219	8.07098	8.93807	8.42301	8.71508	9.15576
chr4	42651751	42653556	17413151	NM_001164044 // Ccl27a // chemokine (C-C motif) ligand 27A // 4 A5|4 13.3 cM // 20301 /	Ccl27a	NM_001164044	NM_001164044 // RefSeq // Mus musculus chemokine (C-C motif) ligand 27A (Ccl27a), trans		8.58202	8.22202	8.80036	8.36325	9.08803	8.28584	8.67953	7.23493	6.99892	8.0825	8.29708	9.11266	8.58613	8.39958	7.81703	8.59176	8.49085	8.9821	8.68155	8.75126	7.37405	9.07581	7.63596	7.3599	8.42052	9.40996	8.83382	8.91078	8.90224	7.2717	9.00891	8.93044	8.70819	8.26171	8.63669	8.89219	8.07098	8.93807	8.42301	8.71508	9.15576
chr4	42568292	42570728	17424421	NM_011888 // Ccl19 // chemokine (C-C motif) ligand 19 // 4 A5|4 // 24047 /// BC051472 /	Ccl19	NM_011888	NM_011888 // RefSeq // Mus musculus chemokine (C-C motif) ligand 19 (Ccl19), mRNA. // c		7.40217	7.22452	7.94059	7.98483	7.78358	8.22364	7.48081	7.31917	6.69065	7.49173	8.34004	7.88002	8.44633	7.20114	8.33822	6.94659	7.54834	8.10447	8.32699	7.06228	6.88876	8.38117	7.88905	6.96709	6.90316	7.94992	7.05609	7.42075	7.0062	7.03189	7.60143	7.99657	7.94515	7.01751	7.32042	7.24804	7.91826	7.98851	8.05281	7.85941	6.61559
chr4	42293864	42294898	17413090	NM_001177580 // Gm13308 // predicted gene 13308 // 4 A5|4 // 621580 /// NM_001164044 //	Gm13308	NM_001177580	NM_001177580 // RefSeq // Mus musculus predicted gene 13308 (Gm13308), mRNA. // chr4 //		8.95815	8.37632	8.76786	9.12044	8.96999	8.45567	8.73703	7.40384	7.27791	8.50049	8.32491	9.28233	8.44262	8.37225	8.7429	9.07583	8.64441	9.2121	8.84005	8.54404	7.40865	8.79417	7.83175	7.35595	8.19927	9.40904	8.36754	8.82354	9.21151	7.24748	8.87887	9.00279	8.75666	8.25596	8.88596	8.77631	8.18219	9.02297	8.36093	9.08215	8.94698
chr4	42438975	42440009	17413103	NM_001177580 // Gm13308 // predicted gene 13308 // 4 A5|4 // 621580 /// NM_001164044 //	Gm13308	NM_001177580	NM_001177580 // RefSeq // Mus musculus predicted gene 13308 (Gm13308), mRNA. // chr4 //		8.95815	8.37632	8.76786	9.12044	8.96999	8.45567	8.73703	7.40384	7.27791	8.50049	8.32491	9.28233	8.44262	8.37225	8.7429	9.07583	8.64441	9.2121	8.84005	8.54404	7.40865	8.79417	7.83175	7.35595	8.19927	9.40904	8.36754	8.82354	9.21151	7.24748	8.87887	9.00279	8.75666	8.25596	8.88596	8.77631	8.18219	9.02297	8.36093	9.08215	8.94698
chr4	49584506	49597876	17425248	NM_025944 // Tmem246 // transmembrane protein 246 // 4 B1|4 // 67063 /// ENSMUST0000004	Tmem246	NM_025944	NM_025944 // RefSeq // Mus musculus transmembrane protein 246 (Tmem246), mRNA. // chr4		7.53803	8.39019	8.13952	8.47736	7.83959	8.28588	8.15205	6.47401	6.84417	8.11566	7.95448	8.47058	8.2412	7.99288	7.73696	8.65564	8.54174	8.01463	8.22194	8.29427	6.58801	8.10616	7.94876	7.28823	8.14464	8.71299	8.32388	8.09076	8.28595	6.27159	8.2026	8.29518	8.32327	7.97537	7.89008	8.06	8.23253	8.52962	8.68809	8.32931	8.29113
chr4	43578715	43587487	17413384	NM_172866 // Rgp1 // RGP1 retrograde golgi transport homolog (S. cerevisiae) // 4 B1|4	Rgp1	NM_172866	NM_172866 // RefSeq // Mus musculus RGP1 retrograde golgi transport homolog (S. cerevis		7.84309	7.99236	7.38444	7.75459	7.54645	7.42548	7.61133	7.98216	8.06982	8.10136	7.19859	7.33014	7.41948	7.38242	7.71498	8.04059	7.4156	8.24283	7.58403	7.82787	7.98285	7.2816	7.81434	8.40226	7.48741	7.63306	7.48083	7.62322	7.66231	7.95808	7.58547	7.52811	7.49799	7.49134	7.58069	7.60219	7.5444	7.69983	7.49318	7.76045	7.6605
chr4	40804602	40854005	17424077	NM_022305 // B4galt1 // UDP-Gal:betaGlcNAc beta 1,4- galactosyltransferase, polypeptide	B4galt1	NM_022305	NM_022305 // RefSeq // Mus musculus UDP-Gal:betaGlcNAc beta 1,4- galactosyltransferase,		9.5445	8.761	7.60204	8.12684	8.5469	7.89015	8.14021	10.2884	10.5608	8.4151	7.89895	8.0193	7.81674	8.2994	7.80539	8.38977	7.69606	8.71916	8.27643	8.40841	10.7199	8.12218	9.20601	10.4293	8.73342	7.55242	8.12767	8.85485	7.62119	10.3251	8.24043	8.3231	8.12923	8.64275	8.69894	7.90192	7.67086	7.57015	7.47667	7.87777	7.46249
chr4	46662318	46991873	17425095	ENSMUST00000107749 // Gabbr2 // gamma-aminobutyric acid (GABA) B receptor, 2 // 4 B1|4	Gabbr2	ENSMUST00000107749	ENSMUST00000107749 // ENSEMBL // cdna:known chromosome:NCBIM37:4:46675190:47004745:-1 g		7.4684	8.99791	8.24691	7.92876	8.11616	9.32784	9.03288	6.47546	5.77498	8.85462	9.26028	8.95925	8.34307	8.13581	9.58527	8.91485	8.73602	8.75142	8.99463	8.77263	6.46855	8.64548	8.59023	6.14943	8.45051	8.9234	6.94983	8.44269	9.36463	6.20244	8.6231	9.51322	8.10948	8.48551	8.17906	7.75877	9.2401	8.5717	9.03808	9.60835	9.38624
chr4	42650604	42656005	17413137	NM_001199961 // Ccl27b // chemokine (C-C motif) ligand 27b // 4 A5|4 // 100040048 /// N	Ccl27b	NM_001199961	NM_001199961 // RefSeq // Mus musculus chemokine (C-C motif) ligand 27b (Ccl27b), trans		8.83721	8.51881	8.73129	8.9982	8.82505	8.13952	8.69231	7.78312	7.40118	8.30609	8.32575	9.22261	8.42792	8.44656	8.3981	8.94113	8.59126	8.99524	8.83787	8.53617	7.74853	8.87179	8.00935	7.61843	8.30557	9.35528	8.58691	8.94044	8.98539	7.49124	8.92644	8.97888	8.6254	8.32691	8.74314	8.80533	8.28892	9.00856	8.43974	8.89872	8.94818
chr4	49521176	49531545	17414061	NM_145547 // Zfp189 // zinc finger protein 189 // 4 B1|4 // 230162 /// ENSMUST000001076	Zfp189	NM_145547	NM_145547 // RefSeq // Mus musculus zinc finger protein 189 (Zfp189), mRNA. // chr4 //		7.96358	8.73176	9.06878	8.82131	8.86202	8.70787	9.09339	7.67783	7.63972	8.8019	9.05253	9.02245	9.00833	8.69957	8.41675	9.06424	9.17605	8.66893	9.21486	9.02973	7.67838	9.15292	8.39803	7.91568	9.08814	9.20633	9.52007	8.68258	9.15151	7.73984	9.22106	8.77706	9.07766	9.13876	8.45386	9.32542	8.98017	9.33201	9.1131	8.91092	9.52074
chr4	42754525	42756577	17424452	ENSMUST00000134240 // Gm2564 // predicted gene 2564 // 4 A5|4 // 100040035 /// ENSMUST0	Gm2564	ENSMUST00000134240	ENSMUST00000134240 // ENSEMBL // cdna:known chromosome:NCBIM37:4:42768057:42770109:-1 g		4.96332	5.52692	6.18055	4.73031	6.09698	6.03379	5.48673	5.40242	5.62019	5.48652	6.35473	5.93862	6.24516	5.19761	6.58931	5.02989	5.65536	6.00733	6.22946	5.24615	5.43275	6.3757	5.70064	5.44304	4.91221	6.09446	5.51528	5.67024	5.59396	5.16644	5.18925	5.72489	5.74307	5.42525	5.84329	5.52875	6.20253	5.91407	6.84703	5.89612	5.35244
chr4	11958184	11966452	17423321	NM_001098231 // Pdp1 // pyruvate dehyrogenase phosphatase catalytic subunit 1 // 4 A1|4	Pdp1	NM_001098231	NM_001098231 // RefSeq // Mus musculus pyruvate dehyrogenase phosphatase catalytic subu		9.05784	9.33406	9.24805	9.345	8.98045	9.32347	9.35052	7.63959	7.76137	9.46437	9.35431	9.29948	9.35566	9.19773	8.87881	9.22373	9.27915	9.1024	9.389	9.0521	7.82732	9.31216	9.05786	8.201	9.27009	9.35852	8.96325	9.13039	9.45562	7.75644	9.17183	9.56819	9.17527	9.19599	9.52871	9.36364	9.27601	9.48479	9.29137	9.23321	9.69194
chr4	33924593	33948831	17412627	ENSMUST00000084736 // Cnr1 // cannabinoid receptor 1 (brain) // 4 A5|4 13.9 cM // 12801	Cnr1	ENSMUST00000084736	ENSMUST00000084736 // ENSEMBL // cdna:known chromosome:NCBIM37:4:34013177:34035794:1 ge		7.45354	5.22538	5.71137	6.7343	6.47395	7.60838	7.22613	5.63572	5.66417	6.21699	6.59821	5.71003	7.26426	5.39418	6.71441	7.24362	5.84253	6.28873	7.22057	6.93122	5.54055	7.04951	6.04754	5.83597	5.35833	5.63402	8.80903	7.72058	6.372	5.38968	5.40763	5.5063	7.06729	5.73983	7.79519	7.77694	8.17178	7.70755	7.8633	5.93997	5.33222
chr4	47465067	47474367	17425151	NM_019998 // Alg2 // asparagine-linked glycosylation 2 (alpha-1,3-mannosyltransferase)	Alg2	NM_019998	NM_019998 // RefSeq // Mus musculus asparagine-linked glycosylation 2 (alpha-1,3-mannos		9.08333	9.45174	9.53114	9.338	9.17064	9.5285	9.39862	9.01828	8.3773	9.32814	9.43602	9.42134	9.27808	9.38339	8.65571	9.66684	9.47224	9.26709	9.58761	9.43885	8.24957	9.49505	9.34732	8.37842	9.61291	9.62969	9.50154	9.30337	9.42491	8.74697	9.47368	9.45209	9.7089	9.19978	9.47612	9.51782	9.21243	9.64949	9.56188	9.53118	9.71439
chr4	46494819	46536144	17425043	NM_029077 // Trim14 // tripartite motif-containing 14 // 4|4 B2 // 74735 /// ENSMUST000	Trim14	NM_029077	NM_029077 // RefSeq // Mus musculus tripartite motif-containing 14 (Trim14), mRNA. // c		7.11079	6.27658	6.34833	6.38853	6.34853	6.05606	5.75017	7.91065	7.94586	6.22221	6.47667	6.5596	6.14399	6.64424	6.27046	6.96547	6.78732	6.65021	5.97589	6.55534	8.66874	6.30528	6.99876	8.07409	6.65976	6.12956	6.09427	6.84721	5.95223	8.32254	6.27309	6.89768	6.06458	6.46924	6.35848	5.92092	6.1907	5.98705	5.91807	6.29464	6.18386
chr4	44034075	44084177	17424822	NM_001190414 // Gne // glucosamine (UDP-N-acetyl)-2-epimerase/N-acetylmannosamine kinas	Gne	NM_001190414	NM_001190414 // RefSeq // Mus musculus glucosamine (UDP-N-acetyl)-2-epimerase/N-acetylm		9.60078	7.41293	7.87389	7.53111	7.30263	7.64066	7.24103	9.24203	10.7256	7.27904	7.21064	7.37868	7.57054	8.76424	7.26963	8.98396	7.79735	7.64635	7.19292	7.60141	10.7312	8.29944	9.12674	11.0657	7.61739	7.56595	7.13605	8.55691	7.4112	11.0096	7.17519	7.17144	6.86861	8.57617	8.07753	7.36743	7.68721	7.475	7.62715	7.25332	7.49773
chr4	46604390	46650209	17425077	NM_198664 // Tbc1d2 // TBC1 domain family, member 2 // 4 B1|4 // 381605 /// ENSMUST0000	Tbc1d2	NM_198664	NM_198664 // RefSeq // Mus musculus TBC1 domain family, member 2 (Tbc1d2), mRNA. // chr		6.39021	6.10457	5.78305	6.41463	5.55798	5.98954	5.80892	7.23805	7.31921	6.01882	6.13498	5.95904	5.73715	6.31991	6.02948	6.12785	6.0623	6.06982	5.7993	5.8852	7.32046	6.11938	6.22073	7.50241	5.95303	5.84753	5.63295	6.06946	6.0653	6.56892	5.92018	5.43468	5.94462	6.36645	5.59521	5.96145	5.82209	5.75371	5.79612	5.81305	5.57904
chr4	21931326	22001461	17412202	NM_175234 // 6230409E13Rik // RIKEN cDNA 6230409E13 gene // 4 A3|4 // 76132 /// ENSMUST	6230409E13Rik	NM_175234	NM_175234 // RefSeq // Mus musculus RIKEN cDNA 6230409E13 gene (6230409E13Rik), mRNA. /		8.05395	8.31813	7.94777	8.0145	7.72873	8.33622	8.09128	6.26105	5.4016	8.40438	7.89545	8.22654	8.09074	8.13932	8.02205	8.39661	8.32147	8.30268	8.12136	8.1125	5.55345	7.93292	8.02593	5.14616	8.36297	8.55901	8.38882	7.95924	8.21666	5.6739	8.20105	8.10237	8.18821	8.06631	8.37317	8.16279	8.48149	8.33233	8.43222	8.41322	8.72013
chr4	43514711	43523765	17424656	NM_009416 // Tpm2 // tropomyosin 2, beta // 4 B1|4 // 22004 /// ENSMUST00000107913 // T	Tpm2	NM_009416	NM_009416 // RefSeq // Mus musculus tropomyosin 2, beta (Tpm2), mRNA. // chr4 // 100 //		8.87285	6.76148	6.16066	5.81846	5.60325	5.97313	5.9705	9.90541	8.67032	5.23188	5.61652	5.87787	5.7355	6.73492	6.54138	5.14258	5.87389	5.7383	6.0067	6.37183	7.83944	5.72233	8.63393	7.51002	6.36593	5.54408	5.56639	8.21616	5.50488	9.28473	6.35988	5.34908	6.11601	7.62401	5.94718	6.59991	5.64851	5.62883	6.41178	5.68856	5.40489
chr4	44081289	44081400	17424848	---		---	ENSMUST00000157907 // ENSEMBL // ncrna:snRNA chromosome:NCBIM37:4:44094161:44094272:-1		7.12748	4.98793	4.65766	5.86599	4.67872	4.99171	4.88621	6.75836	8.65736	5.18345	4.70927	4.73157	5.06083	5.5123	4.67086	6.53444	4.9188	4.71287	4.40723	4.63083	8.98571	4.88806	6.19752	9.27605	4.76092	4.9249	4.5796	6.00979	4.6694	9.427	4.74149	4.98394	5.01744	5.29454	5.2526	4.83603	4.86604	4.54363	4.47514	4.88009	4.28393
chr4	8141493	8239041	17423121	NM_007592 // Car8 // carbonic anhydrase 8 // 4 A1|4 7.7 cM // 12319 /// ENSMUST00000066	Car8	NM_007592	NM_007592 // RefSeq // Mus musculus carbonic anhydrase 8 (Car8), mRNA. // chr4 // 100 /		6.73464	5.9071	5.59728	5.6407	5.01013	5.41999	5.29322	6.25292	8.14973	5.72097	5.46244	5.45618	5.27903	5.47923	5.24282	5.99197	5.3851	5.62804	4.80481	5.12267	8.77721	4.92396	7.39612	8.69516	4.93999	5.57681	5.43444	6.8807	5.37143	7.77021	5.29565	5.76911	5.39127	5.69315	6.97272	5.26517	5.3212	5.28009	5.49802	5.23599	5.54769
chr4	10874498	10899425	17411732	NM_026005 // 2610301B20Rik // RIKEN cDNA 2610301B20 gene // 4 A1|4 // 67157 /// ENSMUST	2610301B20Rik	NM_026005	NM_026005 // RefSeq // Mus musculus RIKEN cDNA 2610301B20 gene (2610301B20Rik), mRNA. /		7.25839	7.81156	7.62888	7.66545	7.46493	7.92499	8.19719	7.03888	6.91324	7.9926	8.00117	8.46803	7.56715	7.06825	7.7387	7.28179	7.5891	7.48696	8.15861	7.36527	6.98723	8.32956	7.36328	7.32931	7.64923	7.99167	8.39749	7.54544	7.52618	7.14679	8.82902	7.78934	7.54911	7.58578	7.85996	8.42442	8.30842	7.97778	7.78075	7.82395	7.86076
chr4	42781928	42856771	17424468	---		---	ENSMUST00000107981 // ENSEMBL // cdna:putative chromosome:NCBIM37:4:42795460:42869643:-		7.34079	7.61334	7.84686	8.1963	7.55244	7.9909	7.397	6.66666	6.44229	6.70898	8.89224	7.21002	8.63964	6.45557	6.62953	7.72858	7.23929	7.6427	8.18004	6.7737	6.08613	7.99671	6.75524	6.43274	6.5631	7.27554	6.55793	7.01368	7.42439	6.63167	7.14266	8.1027	8.49519	6.88197	7.70072	7.2715	7.01738	7.39062	7.61875	7.38639	7.68213
chr4	11704447	11714993	17411840	NM_010276 // Gem // GTP binding protein (gene overexpressed in skeletal muscle) // 4 A1	Gem	NM_010276	NM_010276 // RefSeq // Mus musculus GTP binding protein (gene overexpressed in skeletal		6.49739	7.67949	6.94803	6.97197	6.7699	7.47998	7.75683	6.50315	6.0105	8.40913	7.7274	7.19039	7.79791	6.47595	7.79336	6.3609	6.83094	6.77719	7.73122	7.45054	6.70019	7.80949	7.13625	6.23328	7.0255	8.12793	6.29371	6.9031	7.26728	6.46557	6.90028	7.86139	7.10735	6.86455	6.87505	7.30603	6.75281	7.49781	7.00359	7.10921	7.66608
chr4	43496142	43499695	17424633	NM_001013377 // E130306D19Rik // RIKEN cDNA E130306D19 gene // 4 B1|4 // 230098 /// ENS	E130306D19Rik	NM_001013377	NM_001013377 // RefSeq // Mus musculus RIKEN cDNA E130306D19 gene (E130306D19Rik), mRNA		7.65833	7.6806	8.05295	8.40834	7.85598	7.90504	8.09479	5.98112	6.62137	7.85832	8.20307	8.06419	7.9824	7.66592	8.46187	7.89209	8.01651	7.91559	7.94326	8.38026	6.85048	8.09875	7.32942	7.35023	8.29413	8.20531	8.17546	7.66527	8.16682	6.46734	8.24884	7.56124	8.06979	7.68785	7.59976	8.39131	7.91027	8.04603	8.21992	8.01853	8.09367
chr4	46450902	46472657	17413821	NM_130889 // Anp32b // acidic (leucine-rich) nuclear phosphoprotein 32 family, member B	Anp32b	NM_130889	NM_130889 // RefSeq // Mus musculus acidic (leucine-rich) nuclear phosphoprotein 32 fam		7.98713	8.94448	8.96776	8.80282	9.19681	8.98071	8.9056	7.83573	8.10879	9.23374	9.32634	8.85186	9.5039	9.14372	8.69304	8.76134	9.04981	8.77377	9.39104	9.06951	7.87526	9.06171	8.64187	8.53931	8.37249	8.80794	9.44461	8.74438	9.16496	7.62221	9.23153	8.47131	9.56457	8.62016	8.83719	9.16421	8.99327	9.06157	9.38482	9.31382	8.55797
chr4	40259601	40269850	17424018	NM_134097 // Topors // topoisomerase I binding, arginine/serine-rich // 4 A5|4 // 10602	Topors	NM_134097	NM_134097 // RefSeq // Mus musculus topoisomerase I binding, arginine/serine-rich (Topo		8.35565	8.92185	9.07354	9.18487	8.92127	8.90908	8.81137	8.25644	8.54836	9.37489	9.05535	9.08755	9.3536	8.75245	8.91707	9.02693	8.95567	8.82457	9.10064	8.83323	8.6492	8.9677	8.84665	8.69802	8.66125	9.04814	9.06028	8.67304	8.8919	8.5475	8.9809	8.9207	9.0324	8.6404	8.56356	8.95728	8.90663	9.06988	9.04786	8.71293	9.03351
chr4	46536937	46602202	17425058	NM_178893 // Coro2a // coronin, actin binding protein 2A // 4 B1|4 // 107684 /// ENSMUS	Coro2a	NM_178893	NM_178893 // RefSeq // Mus musculus coronin, actin binding protein 2A (Coro2a), transcr		9.44922	8.9879	8.27794	8.62589	8.18983	9.01376	8.83013	11.0327	10.7428	8.94235	8.71466	8.98287	8.64362	8.98437	8.6745	9.1386	8.50289	9.17208	8.50634	8.68656	10.7214	8.64813	9.70914	10.0123	8.7718	8.89388	7.74162	9.5145	8.53819	10.545	8.39272	8.9025	8.12491	8.57619	8.76723	8.70254	8.30762	8.32656	8.40107	9.00877	8.27271
chr4	42788037	42790421	17548294	---		---	ENSMUST00000105157 // ENSEMBL // cdna:known chromosome:NCBIM37:4:42214615:42216999:-1 g		5.97329	7.79572	6.88207	6.3364	7.08325	7.28507	6.77691	5.89347	5.34993	7.13072	7.99383	6.43597	7.42577	6.34922	6.23251	7.37053	6.82581	6.4725	6.97149	6.33623	5.53444	7.37951	6.77577	5.77042	5.77695	6.87403	5.49194	6.11843	6.79519	5.66879	6.76926	7.59482	7.22342	6.7748	6.90284	6.73607	6.60266	6.69045	7.01395	6.94313	7.11684
chr4	11398667	11401324	17411783	NM_001033275 // Gxylt1 // glucoside xylosyltransferase 1 // 15 E3|15 // 223827 /// ENSM	Gxylt1	NM_001033275	NM_001033275 // RefSeq // Mus musculus glucoside xylosyltransferase 1 (Gxylt1), mRNA. /		7.27644	6.29442	6.62272	6.11186	6.57447	6.49278	6.54156	6.33008	7.07684	6.5145	6.52468	6.51956	6.44833	6.65479	7.25133	6.34742	6.57095	8.17425	6.45485	6.25537	6.82561	6.22155	6.64193	7.81502	6.71757	6.31544	6.75891	6.97235	6.57724	6.85893	6.52594	6.63638	6.18673	6.74517	7.35608	6.27848	6.78737	6.49754	6.33697	6.9346	6.41342
chr4	12153409	12172015	17423373	ENSMUST00000108285 // Fam92a // family with sequence similarity 92, member A // 4|4 A2	Fam92a	ENSMUST00000108285	ENSMUST00000108285 // ENSEMBL // cdna:known chromosome:NCBIM37:4:12080556:12099162:-1 g		8.01539	8.70717	8.6028	8.09707	8.57617	8.41642	8.671	7.63476	7.6234	8.76623	8.47597	8.61162	8.56752	8.58298	8.7108	8.34333	8.82884	8.56104	8.54578	8.60622	7.59153	8.6871	8.25915	7.99917	8.62038	8.60313	8.77742	8.92541	8.697	7.43351	8.86733	8.82792	8.58524	8.56478	8.45939	8.86435	8.73962	8.67184	8.82913	8.70886	8.88619
chr4	52439243	52488365	17414114	ENSMUST00000102915 // Smc2 // structural maintenance of chromosomes 2 // 4 B3|4 18.5 cM	Smc2	ENSMUST00000102915	ENSMUST00000102915 // ENSEMBL // cdna:known chromosome:NCBIM37:4:52452115:52501132:1 ge		10.3431	10.6978	10.9687	10.6563	10.752	10.8248	11.1305	8.66505	9.6153	10.8314	10.8317	10.9091	10.7678	10.762	11.051	10.6885	10.7783	10.8726	10.9124	10.885	9.96744	10.8569	10.6048	10.0514	11.0203	10.9884	11.1937	10.8621	11.1013	9.59726	11.028	10.8526	10.9506	10.8167	10.9726	11.1128	11.0573	10.7713	11.1713	11.0658	10.645
chr4	34550615	34566908	17412645	NM_001007589 // Akirin2 // akirin 2 // 4 A5|4 // 433693 /// ENSMUST00000084299 // Akiri	Akirin2	NM_001007589	NM_001007589 // RefSeq // Mus musculus akirin 2 (Akirin2), mRNA. // chr4 // 100 // 86 /		10.283	10.0028	10.3478	10.3273	10.3194	10.1836	10.4031	9.73289	9.51828	9.86303	10.1485	10.5402	10.2325	10.1145	9.83384	10.2032	10.4047	10.2979	10.1976	10.2168	9.8283	10.4925	10.2849	9.55052	10.2731	10.3592	10.6859	10.2036	10.0212	9.66794	10.4453	10.2947	10.1413	10.1327	10.2769	10.404	10.3928	10.4181	10.3575	10.3435	10.3282
chr4	32238804	32586108	17412374	ENSMUST00000108180 // Bach2 // BTB and CNC homology 2 // 4 A4|4 // 12014 /// NM_0011096	Bach2	ENSMUST00000108180	ENSMUST00000108180 // ENSEMBL // cdna:known chromosome:NCBIM37:4:32325779:32673079:1 ge		7.35662	7.90674	7.76343	8.25973	7.54233	7.41361	7.44676	6.3757	6.09052	7.38344	7.37638	7.03883	7.93886	7.65455	8.10307	8.28915	7.78125	7.72086	7.7923	7.27866	6.038	7.69838	7.5675	6.3384	7.78518	7.44885	7.846	7.62301	7.41866	6.32127	7.95375	8.10026	8.07058	7.75395	7.71241	7.67641	8.16372	7.86698	7.8114	7.72754	8.19681
chr4	48124915	48186507	17413958	NM_026343 // Stx17 // syntaxin 17 // 4 B1|4 // 67727 /// ENSMUST00000107720 // Stx17 //	Stx17	NM_026343	NM_026343 // RefSeq // Mus musculus syntaxin 17 (Stx17), mRNA. // chr4 // 100 // 92 //		8.45068	8.9515	7.94687	7.75586	8.12342	8.03578	8.14256	9.12833	9.17758	8.56186	8.12091	8.01958	8.23014	7.95741	7.491	8.41719	7.69958	8.77978	8.17256	8.18229	9.28433	8.21983	8.89126	9.27837	8.49762	8.56242	7.95729	8.6963	8.15392	9.44834	8.07416	8.32152	7.77735	8.0376	8.29855	8.16807	7.9594	8.25323	8.30358	8.63086	8.13561
chr4	32243733	32246475	17412391	---		---	ENSMUST00000165661 // ENSEMBL // cdna:known chromosome:NCBIM37:4:32330708:32333450:1 ge		5.99671	6.84482	7.09938	6.27297	6.0865	6.34149	6.71679	5.29974	5.49383	6.59766	6.69177	6.10773	6.65953	6.77806	5.66365	6.78898	6.9386	6.03215	6.83379	6.20138	5.16514	7.33568	6.62009	4.94194	6.80476	6.91879	7.3134	6.78811	6.59532	5.34644	7.3132	7.04442	7.36844	6.58141	6.79992	6.97317	7.05799	7.41742	7.02619	6.68634	6.86089
chr4	40850320	40850402	17424092	---		---	ENSMUST00000175230 // ENSEMBL // ncrna:miRNA chromosome:NCBIM37:4:40797353:40797435:-1		10.428	9.18816	8.86512	8.44212	9.76455	8.9388	9.1982	11.1706	11.543	9.02292	9.36801	8.74682	9.1282	9.20591	7.67779	8.73581	8.77704	9.13756	9.35237	9.1983	11.4009	9.00994	10.577	10.9752	9.62603	8.75203	9.42367	9.67788	8.49421	11.2177	9.23606	8.74347	9.37122	8.9862	10.224	8.76625	8.73362	8.40395	8.73961	7.95466	9.05364
chr4	40850144	40850226	17424090	---		---	ENSMUST00000175124 // ENSEMBL // ncrna:miRNA chromosome:NCBIM37:4:40797177:40797259:-1		9.71698	8.25438	8.02913	7.06618	9.05354	8.1477	8.24741	10.3473	10.8468	8.04974	8.50923	7.75178	8.29837	8.34906	6.64557	7.23631	8.07717	8.45553	8.43724	8.40257	10.6591	8.29176	9.64731	10.1935	8.70011	8.11332	8.74187	8.94725	7.57635	10.3018	8.30322	7.68976	8.55267	8.12606	8.71109	8.01921	7.93736	7.65154	7.84599	6.99585	8.29932
chr4	41714798	41723170	17424298	NM_016890 // Dctn3 // dynactin 3 // 4|4 B1 // 53598 /// ENSMUST00000030158 // Dctn3 //	Dctn3	NM_016890	NM_016890 // RefSeq // Mus musculus dynactin 3 (Dctn3), transcript variant 1, mRNA. //		9.54435	9.64792	9.68423	9.93361	9.52566	9.55902	9.71265	9.37549	9.33204	9.72611	9.8509	9.81807	9.63262	9.39923	9.7757	9.79801	9.80026	9.5658	9.94096	9.91748	9.30509	9.86374	9.68282	9.38071	9.52085	9.95286	9.75332	9.39611	9.49353	9.16356	9.76499	9.40098	9.91309	9.33241	9.20821	9.82716	9.67789	9.79979	9.89939	9.85015	9.52564
chr4	14952245	15149794	17423444	NM_178617 // Necab1 // N-terminal EF-hand calcium binding protein 1 // 4 A2|4 // 69352	Necab1	NM_178617	NM_178617 // RefSeq // Mus musculus N-terminal EF-hand calcium binding protein 1 (Necab		11.3656	11.3043	11.5054	10.828	9.69241	10.7767	11.1774	6.21406	6.35864	11.2857	11.1134	11.0174	10.9287	11.6705	10.838	11.4327	11.7988	11.4744	10.5655	10.5746	7.30565	11.0766	10.1572	8.01062	11.1412	11.8115	10.55	11.1629	11.0496	8.23573	10.1511	11.459	10.3843	11.513	10.4055	10.5024	10.9544	11.3883	11.1677	11.0676	10.9659
chr4	15881264	15908064	17411966	ENSMUST00000029876 // Calb1 // calbindin 1 // 4 A2|4 10.5 cM // 12307 /// NM_009788 //	Calb1	ENSMUST00000029876	ENSMUST00000029876 // ENSEMBL // cdna:known chromosome:NCBIM37:4:15808411:15835211:1 ge		7.26836	9.79563	4.84287	8.25015	8.0114	11.1825	9.3311	3.91682	4.10484	10.0673	9.76719	4.85138	9.49551	7.99461	8.8899	9.61012	7.07957	7.93492	10.0732	9.42978	5.26427	10.5624	8.05161	6.09918	8.4975	11.1844	7.92926	8.38589	9.36766	5.928	9.30624	9.98932	7.02201	9.3405	8.34109	6.77194	7.668	9.23957	10.2106	10.2049	11.0847
chr4	41657498	41697091	17424279	NM_016673 // Cntfr // ciliary neurotrophic factor receptor // 4 A5|4 19.9 cM // 12804 /	Cntfr	NM_016673	NM_016673 // RefSeq // Mus musculus ciliary neurotrophic factor receptor (Cntfr), trans		9.11469	10.3115	10.1824	9.79788	9.46435	10.0675	9.91261	8.18114	6.90848	9.62557	10.2319	10.0557	9.99068	10.3166	10.256	10.3228	10.1346	9.51186	9.81604	10.4412	7.22764	10.3384	9.39135	7.97603	10.4984	9.8116	9.01329	9.78525	9.64777	7.40119	10.1381	10.4281	9.98165	10.1067	10.5021	10.1346	9.79802	10.0001	10.3563	10.1891	10.5486
chr4	14929908	14953030	17411948	NM_001243100 // Gm11837 // predicted gene 11837 // 4 A2|4 // 100038514	Gm11837	NM_001243100	NM_001243100 // RefSeq // Mus musculus predicted gene 11837 (Gm11837), mRNA. // chr4 //		6.53671	7.11333	7.0018	6.53685	6.96207	6.84867	7.07399	4.17166	5.44985	6.90235	6.71315	7.36793	6.97084	7.03878	7.19167	6.73091	6.61259	6.64896	6.97315	6.46855	5.1374	7.02979	5.85866	5.24105	6.58168	7.44539	7.03478	7.16591	7.0228	5.50018	7.43756	6.97223	7.27102	6.74742	6.81904	7.02321	7.00602	6.96424	7.09172	7.19519	6.63657
chr4	43654227	43656466	17424782	NM_026871 // Hint2 // histidine triad nucleotide binding protein 2 // 4 B1|4 // 68917 /	Hint2	NM_026871	NM_026871 // RefSeq // Mus musculus histidine triad nucleotide binding protein 2 (Hint2		6.22469	6.11	6.02744	6.51452	5.82379	5.88245	6.10979	6.46035	6.84318	6.28352	6.13171	5.87244	5.43556	6.0692	5.78387	6.08884	6.23973	5.63958	5.8749	5.97516	6.42572	5.79696	6.05599	7.03595	5.92568	5.9603	5.96597	6.07404	6.19765	6.72253	5.81589	5.62184	6.09538	6.01617	6.17635	5.76475	5.89552	5.99583	5.9954	6.25145	5.82228
chr4	9448069	9669344	17423146	NM_023066 // Asph // aspartate-beta-hydroxylase // 4 A1|4 // 65973 /// NM_001177849 //	Asph	NM_023066	NM_023066 // RefSeq // Mus musculus aspartate-beta-hydroxylase (Asph), transcript varia		8.73903	8.56402	8.99004	8.80256	8.58159	8.35837	8.25563	9.12071	9.29442	7.98245	8.38843	8.29843	8.56616	8.96231	8.28665	8.32129	9.19231	8.27182	8.44575	8.53323	9.36769	8.41051	8.5819	9.22094	8.21358	8.42069	8.72322	8.65936	8.12343	9.51713	9.06903	8.70403	8.85603	8.63981	8.4865	8.65887	9.03609	8.58423	8.31955	8.18737	8.64208
chr4	40850056	40850138	17424088	NR_039584 // Mir5123 // microRNA 5123 // 4|4 20.53 cM // 100628614	Mir5123	NR_039584	NR_039584 // RefSeq // Mus musculus microRNA 5123 (Mir5123), microRNA. // chr4 // 100 /		9.87978	8.47702	8.46794	7.31639	9.33056	8.46641	8.5749	10.6415	11.1166	8.49543	8.70766	7.94906	8.47807	8.50235	7.08135	7.70816	8.15434	8.62112	8.79119	8.54793	10.8401	8.52262	9.66357	10.4373	8.77635	8.23071	8.86488	9.10707	7.79697	10.599	8.41743	8.05055	8.81931	8.17765	8.99341	8.34247	8.26089	7.87165	8.17068	7.57682	8.34909
chr4	43566928	43578873	17424742	NM_172692 // Gba2 // glucosidase beta 2 // 4 B1|4 // 230101 /// ENSMUST00000030189 // G	Gba2	NM_172692	NM_172692 // RefSeq // Mus musculus glucosidase beta 2 (Gba2), mRNA. // chr4 // 100 //		9.09799	9.07522	9.23651	9.41569	9.24617	9.20248	9.12534	8.07479	8.33214	8.9586	9.21837	9.36114	9.45024	9.23694	10.0736	9.36954	9.2705	9.80256	9.28211	9.38202	8.32047	9.3593	8.97853	8.68285	9.30477	9.46057	9.4536	8.98809	9.26581	8.3336	9.49953	9.12967	9.20833	9.04097	9.10214	9.44005	9.58052	9.52482	9.2363	9.4339	9.48814
chr4	33208991	33233340	17412593	NM_177774 // Srsf12 // serine/arginine-rich splicing factor 12 // 4 A5|4 // 272009 ///	Srsf12	NM_177774	NM_177774 // RefSeq // Mus musculus serine/arginine-rich splicing factor 12 (Srsf12), m		8.61252	8.50366	8.82156	8.33608	8.23934	8.37188	8.48761	5.78688	5.48379	8.0125	7.59232	8.81851	8.2021	8.58115	8.04041	8.73831	9.12383	8.48777	8.75298	8.74903	5.54623	9.17546	8.25782	5.93723	8.80829	9.02892	8.4059	8.99888	8.81379	6.54722	8.66119	8.65165	8.85069	8.55005	8.51136	8.48016	8.73035	8.93803	8.39411	8.67245	9.17481
chr4	47015669	47057306	17425123	NM_001024136 // Anks6 // ankyrin repeat and sterile alpha motif domain containing 6 //	Anks6	NM_001024136	NM_001024136 // RefSeq // Mus musculus ankyrin repeat and sterile alpha motif domain co		6.93122	6.96055	6.95326	6.96121	6.97063	7.03818	7.09857	6.40683	6.16107	6.90463	7.14969	6.80765	7.07994	7.04999	7.00728	6.88238	7.18117	7.4966	7.23384	7.06766	6.09262	6.80246	6.82374	6.23114	7.01269	7.2198	7.03828	7.01249	7.44001	6.21856	7.06699	6.94591	6.93264	6.95492	7.04686	7.09511	7.03915	7.02724	7.10011	7.33894	7.09278
chr4	42121613	42153435	17424384	---		---	ENSMUST00000133644 // ENSEMBL // cdna:known chromosome:NCBIM37:4:41992336:42024158:-1 g		7.69324	9.0926	8.53998	7.68389	8.96948	8.9234	8.30842	7.45414	6.81617	8.70726	9.14818	7.81815	8.30125	8.09769	7.56052	8.59593	8.39748	8.33181	8.79107	8.20517	7.01431	8.46273	7.87552	6.97377	7.30272	8.12386	7.02021	8.6581	8.94945	7.1427	8.05359	9.09502	8.66121	8.70806	8.7888	7.8015	6.92418	8.11799	7.8812	8.3799	8.79115
chr4	34768664	34778423	17423893	BC027508 // 1810030N24Rik // RIKEN cDNA 1810030N24 gene // 4 A5|4 // 66291 /// NM_02547	1810030N24Rik	BC027508	BC027508 // GenBank // Mus musculus RIKEN cDNA 1810030N24 gene, mRNA (cDNA clone MGC:41		9.03057	8.74041	8.65307	8.48967	8.22929	8.18962	8.78138	8.66667	9.04084	8.60046	8.20839	8.49777	7.9583	8.69664	7.91418	8.80664	8.57584	8.12535	8.2253	8.32631	8.57531	8.37689	8.26043	8.98212	8.69694	8.49943	8.78374	8.52404	8.63804	8.97103	8.65253	8.30224	8.90065	8.67975	8.76155	8.53356	8.00279	8.68613	8.34413	8.47894	8.52801
chr4	12039355	12090020	17423340	ENSMUST00000108293 // Tmem67 // transmembrane protein 67 // 4 A1|4 // 329795 /// NM_177	Tmem67	ENSMUST00000108293	ENSMUST00000108293 // ENSEMBL // cdna:known chromosome:NCBIM37:4:11966792:12017167:-1 g		8.49956	9.04214	9.1012	9.35822	9.06223	9.51229	9.30559	8.62452	8.69169	9.32737	9.34997	9.4536	9.16647	8.8375	9.46233	9.09085	8.63212	8.80662	9.47877	9.17688	8.8747	9.02544	8.42133	9.1495	9.24321	9.29177	9.42787	8.78799	8.88654	8.89595	9.86304	8.96438	9.15187	9.02665	8.80228	9.56035	9.60394	9.17201	9.09864	8.78642	9.51767
chr4	44004452	44032846	17413511	NM_001080385 // Clta // clathrin, light polypeptide (Lca) // 4 B1|4 // 12757 /// ENSMUS	Clta	NM_001080385	NM_001080385 // RefSeq // Mus musculus clathrin, light polypeptide (Lca) (Clta), transc		9.75384	9.87431	9.98088	9.43282	9.76189	9.73894	9.77318	9.55167	9.51567	9.43769	9.71142	9.77962	9.86067	9.84293	9.90544	9.67887	9.93059	9.6823	10.0061	9.88486	9.65744	9.87147	9.77466	9.54195	9.72076	9.9613	9.86407	9.70869	9.85895	9.43312	9.92035	9.83963	10.0669	9.82843	10.085	10.0504	9.85965	9.9755	9.90714	10.0009	9.93348
chr4	40203773	40239828	17423987	NM_172689 // Ddx58 // DEAD (Asp-Glu-Ala-Asp) box polypeptide 58 // 4 A5|4 // 230073 ///	Ddx58	NM_172689	NM_172689 // RefSeq // Mus musculus DEAD (Asp-Glu-Ala-Asp) box polypeptide 58 (Ddx58),		8.86758	7.31936	7.01765	7.93053	8.12319	7.3943	6.91769	9.1868	9.75533	7.26512	7.58411	7.39845	7.98551	7.83117	8.00596	8.20115	7.70356	7.57312	7.39053	8.12771	10.9096	7.52533	7.93609	10.5426	7.27664	7.4462	6.56163	8.08495	7.32096	9.99437	6.83732	7.49812	6.83237	8.704	7.21921	7.02622	6.90319	7.01971	6.61778	6.86062	6.83949
chr4	42736593	42738094	17413170	---		---	ENSMUST00000144765 // ENSEMBL // cdna:known chromosome:NCBIM37:4:42750125:42751626:1 ge		7.61108	8.626	8.2367	8.29064	8.88096	8.70335	8.10332	7.36564	7.03114	8.35888	9.22182	7.7144	8.21781	7.73151	7.09103	8.7909	7.94826	8.17923	8.21586	8.02236	6.8372	8.40889	7.48179	7.08004	7.34783	8.1359	6.96025	8.47378	8.87683	7.07735	7.83153	8.65386	8.38619	8.36708	8.29019	7.60716	6.48639	8.04346	7.49599	8.04756	8.64551
chr4	49661611	49845744	17425255	ENSMUST00000076674 // Grin3a // glutamate receptor ionotropic, NMDA3A // 4 B1|4 // 2424	Grin3a	ENSMUST00000076674	ENSMUST00000076674 // ENSEMBL // cdna:known chromosome:NCBIM37:4:49674483:49858421:-1 g		7.39439	7.06433	5.60544	6.78714	7.57822	8.44311	8.71494	5.61773	5.46972	7.16383	6.48194	5.91675	6.81558	7.21728	8.1808	7.88505	5.8356	6.37312	8.2771	8.44337	5.93458	8.26589	6.32228	5.52495	6.67465	7.7854	8.06238	7.03383	8.56979	6.15383	9.48294	7.55235	8.77791	6.59983	7.97301	9.28167	8.56675	7.60124	7.87936	8.14285	6.80358
chr4	42035113	42035538	17412998	NR_033123 // 4933409K07Rik // RIKEN cDNA 4933409K07 gene // 4 A5|4 // 108816 /// NR_033	4933409K07Rik	NR_033123	NR_033123 // RefSeq // Mus musculus RIKEN cDNA 4933409K07 gene (4933409K07Rik), non-cod		8.02741	9.39925	9.04552	8.80487	9.29351	9.60207	8.58935	7.72759	6.80267	8.46964	10.0905	8.337	9.98953	8.99274	8.24355	9.59138	9.12319	8.36396	9.02034	8.57519	6.88082	9.04559	8.83914	7.29294	8.31465	8.42192	7.61958	8.60283	8.98948	6.99652	8.69711	9.45155	9.58884	9.15362	8.98663	8.63302	8.3356	8.83904	8.4597	8.88767	9.70766
chr4	42458751	42459176	17424410	NR_033123 // 4933409K07Rik // RIKEN cDNA 4933409K07 gene // 4 A5|4 // 108816 /// NR_033	4933409K07Rik	NR_033123	NR_033123 // RefSeq // Mus musculus RIKEN cDNA 4933409K07 gene (4933409K07Rik), non-cod		8.02741	9.39925	9.04552	8.80487	9.29351	9.60207	8.58935	7.72759	6.80267	8.46964	10.0905	8.337	9.98953	8.99274	8.24355	9.59138	9.12319	8.36396	9.02034	8.57519	6.88082	9.04559	8.83914	7.29294	8.31465	8.42192	7.61958	8.60283	8.98948	6.99652	8.69711	9.45155	9.58884	9.15362	8.98663	8.63302	8.3356	8.83904	8.4597	8.88767	9.70766
chr4	12140117	12146745	17411892	NM_028226 // Rbm12b // RNA binding motif protein 12B // --- // 72397 /// ENSMUST0000005	Rbm12b	NM_028226	NM_028226 // RefSeq // Mus musculus RNA binding motif protein 12B (Rbm12b), mRNA. // ch		5.55616	4.738	6.45987	5.80651	6.25669	5.9129	6.16325	5.88965	5.55259	4.84264	6.40379	6.3765	5.4839	6.15867	5.66462	6.04102	6.64949	5.94939	5.60445	6.14035	5.42004	5.41589	5.23555	5.85008	6.31097	6.59307	6.43007	6.40338	7.02987	5.44665	6.46486	6.14214	5.83031	6.08569	5.84536	6.49702	6.72208	6.1575	6.12769	6.43895	6.70177
chr4	11279265	11279419	17423289	---		---	ENSMUST00000158560 // ENSEMBL // ncrna:snRNA chromosome:NCBIM37:4:11206412:11206566:-1		4.87205	5.20515	4.60091	4.28878	4.54367	4.01998	4.60013	5.35876	5.73438	3.52616	4.37447	3.44969	4.01298	5.93962	3.25972	4.42806	4.61944	3.44037	3.19608	4.58998	5.82191	3.48705	3.33952	5.56914	5.79816	4.80421	3.67063	5.22212	5.56643	5.15279	4.10923	4.93302	5.25021	5.83839	4.71035	4.43852	3.8136	4.28583	3.79788	3.47695	5.49645
chr4	42949814	42959425	17413191	ENSMUST00000037872 // Dnajb5 // DnaJ (Hsp40) homolog, subfamily B, member 5 // 4|4 B1 /	Dnajb5	ENSMUST00000037872	ENSMUST00000037872 // ENSEMBL // cdna:known chromosome:NCBIM37:4:42962686:42972297:1 ge		7.8648	7.43692	7.29944	7.40092	7.3909	7.77873	7.62235	6.84439	6.54168	7.09616	7.25411	7.55201	7.28295	7.49662	7.81169	7.49777	7.49355	7.70372	7.29183	7.58868	6.5145	7.78499	7.19634	6.44113	7.77282	7.97017	7.16974	7.28053	7.61967	6.76761	7.37198	7.4764	7.76949	7.62756	7.50154	7.3116	7.71987	7.79908	7.79568	7.53748	7.99536
chr4	42219428	42219853	17424405	NR_033123 // 4933409K07Rik // RIKEN cDNA 4933409K07 gene // 4 A5|4 // 108816 /// NR_033	4933409K07Rik	NR_033123	NR_033123 // RefSeq // Mus musculus RIKEN cDNA 4933409K07 gene (4933409K07Rik), non-cod		7.98218	9.22915	8.94205	8.52953	9.01139	9.51411	8.51613	7.57816	6.65737	8.29752	9.98437	8.22614	9.943	8.81871	8.26302	9.13247	8.92915	8.22836	8.96486	8.41367	6.91643	9.0026	8.59312	7.20863	8.23042	8.28522	7.62064	8.4248	8.93988	6.93646	8.55079	9.30466	9.45743	8.97541	8.79482	8.46335	8.21052	8.68961	8.3192	8.71602	9.41672
chr4	41505009	41517333	17424249	NM_001048005 // 1110017D15Rik // RIKEN cDNA 1110017D15 gene // 4|4 B1 // 73721 /// NM_0	1110017D15Rik	NM_001048005	NM_001048005 // RefSeq // Mus musculus RIKEN cDNA 1110017D15 gene (1110017D15Rik), tran		6.38643	6.47283	6.42251	6.53685	6.42881	6.68158	6.59519	6.28643	6.1254	6.93881	6.74637	6.88388	6.62035	6.30977	6.90192	6.53605	6.70389	7.18326	6.87781	6.58524	6.03864	6.79322	6.43549	5.91825	6.41014	6.98993	6.31197	6.55184	6.80955	5.92886	6.53487	6.68456	6.44548	6.14685	6.61565	6.70531	6.73509	6.62146	6.71687	6.96873	6.3976
chr4	33310311	33502614	17412602	NM_011884 // Rngtt // RNA guanylyltransferase and 5'-phosphatase // 4 A5|4 // 24018 ///	Rngtt	NM_011884	NM_011884 // RefSeq // Mus musculus RNA guanylyltransferase and 5'-phosphatase (Rngtt),		8.28261	8.47879	8.81683	8.39306	8.59583	8.7297	8.82687	7.91588	8.35631	8.31135	8.70219	8.83067	8.77024	8.67946	8.59221	8.68381	8.89571	8.53115	8.66562	8.88013	8.41704	9.07372	8.21616	8.41881	8.8802	8.69493	8.92824	8.55329	8.935	8.48228	9.01414	8.64894	8.80711	8.7487	8.60836	9.1792	8.76464	8.61007	8.83991	8.35511	8.94876
chr4	42916660	42944752	17413173	ENSMUST00000107976 // N28178 // expressed sequence N28178 // 4 A5|4 // 230085 /// ENSMU	N28178	ENSMUST00000107976	ENSMUST00000107976 // ENSEMBL // cdna:known chromosome:NCBIM37:4:42930123:42957624:1 ge		6.34831	7.59984	6.6798	6.33556	6.90308	7.60218	7.33509	6.41072	6.01698	6.68484	8.06365	6.25931	6.4473	6.56132	7.38359	7.34403	6.67896	6.77409	6.7544	7.07221	6.14684	6.86644	6.98332	6.1233	6.63581	6.93697	6.21342	7.19363	7.32161	5.89851	6.5544	6.7565	6.69632	7.18684	6.9243	6.4659	6.83328	7.23733	6.86782	6.98226	8.29291
chr4	43668971	43692668	17413436	ENSMUST00000107864 // Tmem8b // transmembrane protein 8B // 4 B1|4 // 242409 /// ENSMUS	Tmem8b	ENSMUST00000107864	ENSMUST00000107864 // ENSEMBL // cdna:known chromosome:NCBIM37:4:43682159:43705540:1 ge		7.83173	8.34549	8.18659	8.15451	8.21676	8.26576	8.24653	7.17017	6.80218	8.12009	7.61477	8.02681	8.20208	8.12505	8.35228	8.66737	8.31808	8.87027	8.49108	8.08061	6.57193	8.11697	8.23048	7.0981	8.14883	8.42953	8.28972	8.51827	8.16308	7.03212	8.29661	8.06925	8.45549	8.13098	8.71773	8.30161	8.76643	8.43843	8.94288	8.73853	8.38896
chr4	34949074	35157484	17423915	NM_178061 // Mob3b // MOB kinase activator 3B // 4 A5|4 42.6 cM // 214944 /// ENSMUST00	Mob3b	NM_178061	NM_178061 // RefSeq // Mus musculus MOB kinase activator 3B (Mob3b), mRNA. // chr4 // 1		6.20522	6.762	5.08349	5.59862	7.13147	5.52202	5.4818	7.14841	7.46755	5.17173	6.0169	4.94753	5.32252	6.17784	5.19366	6.67604	5.58359	5.06816	4.82313	6.3716	7.31182	5.17798	5.93588	6.9237	5.97834	4.25952	4.33715	5.91556	5.37201	7.48709	6.91693	7.10895	6.65611	5.25958	6.94665	6.68416	4.86918	5.88108	4.6555	5.19701	5.78322
chr4	32514787	32515053	17412402	---		---	ENSMUST00000122662 // ENSEMBL // ncrna:misc_RNA chromosome:NCBIM37:4:32601762:32602028:		4.99711	4.72015	5.43293	5.00372	4.70895	5.04796	4.98364	4.79398	4.6503	4.85041	4.76228	4.78849	5.07599	5.29287	5.02541	4.98839	5.28082	4.45692	5.36641	4.92072	4.65165	5.39357	4.74263	4.65144	4.82336	4.80231	5.64931	4.63546	4.94791	4.6078	4.96259	5.05861	5.72696	4.90759	5.33349	5.38898	4.93705	5.58126	5.192	4.81306	5.63248
chr4	43381979	43427088	17413300	ENSMUST00000098106 // Rusc2 // RUN and SH3 domain containing 2 // 4 A5|4 // 100213 ///	Rusc2	ENSMUST00000098106	ENSMUST00000098106 // ENSEMBL // cdna:known chromosome:NCBIM37:4:43419307:43439960:1 ge		6.85836	6.93679	6.85944	7.12025	7.18986	7.58	6.9839	7.05212	6.90535	6.92366	7.37343	6.71159	7.1087	6.89728	7.38519	6.94761	6.92737	7.03103	7.25264	7.0301	6.85492	7.22522	7.00724	6.823	6.81763	7.00845	6.79154	6.84855	7.20256	6.63862	6.7638	6.91566	6.80874	6.79996	7.06463	6.91587	6.92354	7.08893	6.97677	6.89352	6.95944
chr4	53030787	53159895	17425301	NM_013454 // Abca1 // ATP-binding cassette, sub-family A (ABC1), member 1 // 4 A5-B3|4	Abca1	NM_013454	NM_013454 // RefSeq // Mus musculus ATP-binding cassette, sub-family A (ABC1), member 1		9.23605	9.41061	8.89479	9.16695	9.57927	8.95701	8.40597	9.12066	9.3889	9.14386	8.40313	8.58933	8.70734	9.67264	9.35124	8.51334	8.71501	10.0625	8.95528	9.11529	9.58594	8.84518	9.97022	9.25568	8.51544	8.39444	7.53119	9.48165	8.01041	9.48336	9.14365	9.50368	8.89273	9.70718	8.97082	7.98346	8.59791	8.00276	7.57211	8.03678	8.04225
chr4	40270591	40279421	17424023	ENSMUST00000095128 // Ndufb6 // NADH dehydrogenase (ubiquinone) 1 beta subcomplex, 6 //	Ndufb6	ENSMUST00000095128	ENSMUST00000095128 // ENSEMBL // cdna:known chromosome:NCBIM37:4:40217624:40226454:-1 g		9.77264	9.91823	9.8762	10.065	9.84176	9.67965	10.0055	9.74809	9.6845	10.0824	9.95702	9.91503	9.81536	9.92218	9.66872	10.1762	10.2759	9.60548	10.0099	10.0007	9.60792	10.1055	9.83185	9.74291	9.69874	10.0879	9.92389	9.79324	10.1698	9.53409	9.80301	9.71015	10.1436	9.8366	9.54106	9.96052	9.70431	10.1319	9.99168	10.0788	9.85972
chr4	13743302	13893649	17411918	NM_001111027 // Runx1t1 // runt-related transcription factor 1; translocated to, 1 (cyc	Runx1t1	NM_001111027	NM_001111027 // RefSeq // Mus musculus runt-related transcription factor 1; translocate		8.42264	8.51966	9.18571	9.16151	7.78063	8.80364	8.35438	6.49385	6.08975	7.80185	7.97118	9.3369	9.15431	9.04185	9.37996	9.52855	9.37317	9.39424	8.35352	8.5087	6.98069	9.03284	8.34732	7.1214	9.39677	8.91686	6.7223	9.17411	8.14306	6.75035	9.55722	9.07208	8.63565	8.86531	8.59224	8.22391	8.63497	9.25086	8.91572	8.83358	9.54404
chr4	37297905	37298025	17412717	---		---	ENSMUST00000158093 // ENSEMBL // ncrna:snoRNA chromosome:NCBIM37:4:37244938:37245058:1		4.71676	5.02015	5.22051	4.16295	4.62142	4.98712	5.013	4.33691	3.95704	5.53034	5.67849	5.28308	6.14205	4.59063	4.72881	4.68852	4.90355	4.54849	5.69798	5.03017	4.79754	4.83134	4.77579	4.52446	4.16151	4.68639	5.97586	4.46667	5.42253	4.19178	5.39806	5.05169	5.57838	4.74443	4.62106	5.29953	4.76912	4.83981	6.11954	4.96798	4.74039
chr4	48662601	48663127	17548338	NM_021436 // Tmeff1 // transmembrane protein with EGF-like and two follistatin-like dom	Tmeff1	NM_021436	NM_021436 // RefSeq // Mus musculus transmembrane protein with EGF-like and two follist		3.23797	3.61436	4.0396	4.36618	3.84928	5.66772	3.58922	3.23544	3.74869	3.891	5.42436	3.74303	6.88238	3.88472	3.82442	3.91961	4.16488	3.59884	4.55453	3.98529	3.23038	4.39675	3.28072	3.32179	3.58118	3.68744	4.78202	3.56901	3.84651	3.75461	4.54504	3.50121	6.51943	4.00241	3.60193	4.77124	3.80912	4.29982	3.89263	3.43825	3.91798
chr4	49474307	49474410	17414059	---		---	ENSMUST00000122530 // ENSEMBL // ncrna:snRNA chromosome:NCBIM37:4:49487179:49487282:1 g		7.86681	6.96293	7.96503	6.66889	6.3604	6.17849	6.05595	8.45629	8.74977	6.22947	5.33137	6.42808	5.49594	7.54429	5.50796	6.71886	7.52821	7.01594	5.67681	5.3168	7.44512	5.1692	6.7794	7.27012	6.78731	6.7444	6.15083	8.18275	6.43874	7.76983	6.08285	7.70568	5.2666	7.10876	5.50933	5.77256	5.90515	6.93767	5.51718	6.71808	5.74588
chr4	9269293	9451691	17411697	ENSMUST00000108348 // Clvs1 // clavesin 1 // 4 A1|4 // 74438 /// NM_028940 // Clvs1 //	Clvs1	ENSMUST00000108348	ENSMUST00000108348 // ENSEMBL // cdna:known chromosome:NCBIM37:4:9198602:9378838:1 gene		7.66738	8.10103	7.91082	7.46298	7.50476	7.35836	7.90921	5.68192	4.94676	7.5503	6.97675	7.80273	7.58913	7.48774	7.12802	8.7613	8.55165	8.0491	7.67692	7.6229	6.34503	6.76868	7.70159	5.60739	8.82347	8.71708	7.77749	8.37602	8.20806	6.05649	7.99516	8.62716	7.88506	8.4291	8.90298	7.57237	9.13006	8.61192	8.46061	8.32958	8.42972
chr4	44300876	44364675	17413528	NM_010790 // Melk // maternal embryonic leucine zipper kinase // 4 B1|4 26.7 cM // 1727	Melk	NM_010790	NM_010790 // RefSeq // Mus musculus maternal embryonic leucine zipper kinase (Melk), mR		8.99184	9.393	9.78718	9.41384	9.22725	9.4785	9.82022	7.04857	8.46596	9.57506	9.4281	9.59791	9.38776	9.48214	9.13484	9.68469	9.61806	9.34362	9.55357	9.6327	8.4252	9.5386	9.10802	9.00047	9.64049	9.73486	9.91194	9.09461	9.79708	7.91618	9.76121	9.24194	9.61335	9.43069	9.47746	9.85521	9.46692	9.61592	9.91496	9.84326	9.44921
chr4	33170401	33189737	17423781	NM_001034867 // Pm20d2 // peptidase M20 domain containing 2 // 4 A5|4 // 242377 /// ENS	Pm20d2	NM_001034867	NM_001034867 // RefSeq // Mus musculus peptidase M20 domain containing 2 (Pm20d2), mRNA		6.50283	7.17697	6.65132	6.29138	6.91841	6.64932	6.68001	7.63672	7.30004	6.41685	6.78265	6.70149	6.51755	6.8134	6.71102	6.57214	6.49771	6.91206	6.83901	6.57426	7.02418	7.12715	7.16729	7.06359	6.76847	6.93329	7.01897	6.89122	6.69937	7.7895	7.09811	6.90312	7.13879	6.14616	6.71884	7.02787	7.0741	6.85839	6.71854	7.11284	6.26665
chr4	21727701	21759922	17412123	NM_001122982 // Ccnc // cyclin C // 4 A3|4 // 51813 /// ENSMUST00000065928 // Ccnc // c	Ccnc	NM_001122982	NM_001122982 // RefSeq // Mus musculus cyclin C (Ccnc), transcript variant 2, mRNA. //		8.13963	8.43291	8.79965	8.33025	8.80732	8.37305	9.08243	8.33721	8.55761	8.74852	8.54667	8.72151	8.53451	8.78496	7.84988	8.66555	8.99691	8.34699	8.68433	8.84593	8.49513	8.93198	8.46323	8.6065	9.16491	8.96554	9.28917	8.94593	9.20422	8.58926	9.10451	8.91746	8.59785	8.97587	8.73396	9.05801	8.72873	8.75072	9.16331	8.76048	9.06627
chr4	48585174	48663131	17414017	NM_021436 // Tmeff1 // transmembrane protein with EGF-like and two follistatin-like dom	Tmeff1	NM_021436	NM_021436 // RefSeq // Mus musculus transmembrane protein with EGF-like and two follist		10.1531	10.327	10.6433	10.6488	10.2542	10.5072	10.4856	7.62863	8.9366	9.49931	10.2609	10.4258	10.6785	10.7223	9.84179	10.7741	10.7678	10.2755	10.586	10.2694	8.89721	10.8163	9.79117	9.02569	10.4545	10.2591	10.8314	9.66068	10.3466	9.00146	10.8593	9.94196	10.919	10.945	10.333	10.8195	10.465	10.5739	10.2819	9.65349	10.9203
chr4	11156431	11174379	17411751	NM_001199105 // Trp53inp1 // transformation related protein 53 inducible nuclear protei	Trp53inp1	NM_001199105	NM_001199105 // RefSeq // Mus musculus transformation related protein 53 inducible nucl		9.48701	9.41422	8.40395	8.7686	9.39405	9.20427	9.12327	9.68221	9.25004	8.87521	9.2842	8.99978	8.95718	8.89729	8.45491	8.77849	9.15213	9.75117	8.81735	9.06096	9.76626	8.62628	9.58943	9.6264	9.097	9.38593	9.0428	9.61437	8.64482	9.03423	9.11222	9.68711	9.32211	9.19614	9.89783	9.14535	8.69668	9.04342	8.04079	8.64643	9.21538
chr4	32615451	32653265	17412404	NM_011997 // Casp8ap2 // caspase 8 associated protein 2 // 4 A5|4 11.4 cM // 26885 ///	Casp8ap2	NM_011997	NM_011997 // RefSeq // Mus musculus caspase 8 associated protein 2 (Casp8ap2), transcri		9.33325	9.6547	9.86639	9.65763	9.60911	9.8196	9.80122	8.78519	9.52253	9.96309	9.80425	9.92336	10.1391	9.90137	10.181	9.67929	9.87601	9.61463	9.915	9.67835	9.71128	9.8354	9.42376	9.67941	9.69863	9.62864	10.1214	9.87068	9.82546	9.51145	10.0243	9.79732	9.73671	9.97727	9.70744	10.0205	10.0347	9.80226	9.98108	9.52451	10.0211
chr4	40775110	40775766	17424075	NM_025498 // Psenen // presenilin enhancer 2 homolog (C. elegans) // 7 B1|7 // 66340 //	Psenen	NM_025498	NM_025498 // RefSeq // Mus musculus presenilin enhancer 2 homolog (C. elegans) (Psenen)		11.9874	11.7147	11.8048	11.6468	11.8646	11.3407	11.5676	11.9212	11.8562	11.5608	11.4557	11.8262	11.2471	11.7078	11.2147	11.4174	11.5363	11.1471	11.6407	11.6664	11.8534	11.5977	11.5732	11.8866	11.7476	11.6936	11.6585	11.7067	11.5938	11.8504	11.6886	11.3283	11.7714	11.673	11.8384	11.644	11.3831	11.74	11.6908	11.469	11.6202
chr4	32382318	32392411	17412400	XR_107575 // Gm20066 // predicted gene, 20066 // --- // 100504106	Gm20066	XR_107575	AK042574 // GenBank HTC // Mus musculus 7 days neonate cerebellum cDNA, RIKEN full-leng		5.69514	5.87013	6.19426	5.40349	5.72118	5.91531	5.98265	5.49979	5.29365	5.90299	5.45949	5.56658	5.76362	6.50249	5.68902	6.16337	6.12496	5.8501	6.03694	5.73616	5.28172	6.22546	5.83394	5.21724	6.27781	6.04145	6.33093	5.99977	5.7182	4.97197	6.48356	6.14278	6.24303	6.28962	6.18501	6.13526	6.52458	5.9919	6.20098	5.67324	6.39955
chr4	47208012	47313167	17413866	NM_009928 // Col15a1 // collagen, type XV, alpha 1 // 4|4 B1-B3 // 12819 /// ENSMUST000	Col15a1	NM_009928	NM_009928 // RefSeq // Mus musculus collagen, type XV, alpha 1 (Col15a1), mRNA. // chr4		6.75087	6.50807	5.91928	5.80064	6.77745	6.19273	6.48298	7.583	7.31936	6.42557	6.12062	6.23856	5.76932	6.47282	6.27535	5.97563	6.24145	6.55719	6.44571	7.30951	7.15579	6.34969	6.99156	7.51734	6.70056	6.95655	6.0226	6.44106	6.87079	6.60582	6.33763	6.37463	6.23757	6.93986	6.18787	5.98205	6.17605	5.91303	6.29549	6.32247	6.34157
chr4	43027690	43031710	17424554	ENSMUST00000030169 // Stoml2 // stomatin (Epb7.2)-like 2 // 4|4 B1 // 66592 /// NM_0232	Stoml2	ENSMUST00000030169	ENSMUST00000030169 // ENSEMBL // cdna:known chromosome:NCBIM37:4:43040562:43044582:-1 g		8.39529	8.41063	8.40246	8.44631	8.18722	8.39369	8.37377	8.22268	8.25724	8.62915	8.5894	8.46629	8.3399	8.04103	8.33267	8.40317	8.41569	7.98211	8.35292	8.31343	8.2787	8.51475	8.09602	8.18972	8.00486	8.41478	8.57295	8.06229	8.47383	7.92541	8.52382	8.04439	8.70295	8.12315	8.09991	8.55912	8.389	8.57088	8.69077	8.46945	8.29164
chr4	44981395	44990734	17413573	ENSMUST00000045078 // Grhpr // glyoxylate reductase/hydroxypyruvate reductase // 4|4 B2	Grhpr	ENSMUST00000045078	ENSMUST00000045078 // ENSEMBL // cdna:known chromosome:NCBIM37:4:44994267:45003606:1 ge		8.54626	8.03898	8.36073	8.74453	8.85362	8.31264	7.8229	9.15945	9.33903	8.76298	8.30325	8.28483	8.24273	7.95935	7.78992	8.49009	8.41389	8.23337	8.63305	8.53456	8.69516	8.46467	8.27867	9.22528	7.8567	8.01008	8.16542	8.23542	7.99638	9.18758	8.37224	7.79412	8.50716	7.70059	7.62999	8.11124	7.67049	8.03081	8.44305	8.22875	7.77023
chr4	11611139	11615007	17423317	---		---	ENSMUST00000148576 // ENSEMBL // cdna:known chromosome:NCBIM37:4:11538286:11542154:-1 g		3.59203	3.1932	3.59341	4.11929	3.82102	3.60688	3.65212	3.46908	3.36093	3.70379	4.01701	3.72398	4.09472	3.47233	3.54777	3.5756	3.52533	3.76748	3.98961	3.52282	3.41513	3.77755	3.35783	3.40732	3.7314	3.62271	3.90394	3.28032	3.61473	3.48154	3.53029	3.74353	3.82571	3.59018	3.83002	3.63852	3.49024	3.684	3.50999	3.4505	3.58772
chr4	46489248	46503632	17413832	ENSMUST00000030018 // Nans // N-acetylneuraminic acid synthase (sialic acid synthase) /	Nans	ENSMUST00000030018	ENSMUST00000030018 // ENSEMBL // cdna:known chromosome:NCBIM37:4:46502120:46516504:1 ge		8.57904	8.21165	8.41216	8.5817	8.20408	8.3861	8.13314	9.04213	9.30354	8.04257	8.42943	8.36398	8.36719	8.2023	8.40512	8.43128	8.36136	7.89409	8.35883	8.50983	9.20626	8.49257	8.06198	9.31854	7.9238	8.06272	8.21934	8.05933	8.32386	9.22909	8.50839	7.89522	8.4713	8.17058	7.95441	8.45304	7.87296	8.33214	8.43416	7.98651	8.24127
chr4	49678747	49682024	17425271	ENSMUST00000029991 // Ppp3r2 // protein phosphatase 3, regulatory subunit B, alpha isof	Ppp3r2	ENSMUST00000029991	ENSMUST00000029991 // ENSEMBL // cdna:known chromosome:NCBIM37:4:49691619:49694896:-1 g		5.56222	5.33405	4.96893	5.39754	5.76497	5.94047	5.95954	4.79821	4.90541	5.03195	5.26204	4.86103	4.90272	5.17756	5.60969	5.08572	4.96301	5.25965	5.65335	5.69084	4.8512	5.99818	5.10664	4.81248	5.1721	5.45838	5.95379	5.06439	6.21135	4.78148	6.51626	5.36421	6.06273	5.06069	5.40452	6.6577	6.03042	5.41263	5.56079	5.45759	5.05589
chr4	41495601	41503076	17424243	NM_001085515 // AI464131 // expressed sequence AI464131 // 4 A5|4 // 329828 /// ENSMUST	AI464131	NM_001085515	NM_001085515 // RefSeq // Mus musculus expressed sequence AI464131 (AI464131), mRNA. //		6.78181	5.31701	5.73869	5.53822	5.56337	5.55827	5.53706	6.17164	6.00082	5.35656	5.57492	5.72066	5.55732	5.53863	5.30626	5.37454	5.65564	5.61534	5.21137	5.3216	5.64525	5.68545	5.91114	5.83547	5.4191	5.27068	5.37871	5.71252	5.35625	6.29994	5.36419	5.34605	5.85242	5.46734	5.36054	5.32152	5.13066	5.53686	5.38646	5.48012	5.51611
chr4	17853091	18119145	17412013	ENSMUST00000029881 // Mmp16 // matrix metallopeptidase 16 // 4 A3|4 3.6 cM // 17389 ///	Mmp16	ENSMUST00000029881	ENSMUST00000029881 // ENSEMBL // cdna:known chromosome:NCBIM37:4:17780605:18046292:1 ge		6.52373	4.67896	4.33216	5.63306	6.42147	6.60141	6.94548	5.69307	6.35398	5.44185	4.87643	5.61515	5.25248	4.43654	5.94669	5.35213	4.61605	5.45508	5.88962	5.37477	5.42129	4.58504	5.07728	5.27189	4.9146	5.50456	5.47116	4.75361	7.28084	5.64876	5.35511	4.98928	4.70071	5.46857	5.85579	5.41704	5.59409	5.53405	5.08535	5.22825	5.06571
chr4	32657119	32775217	17412418	NM_001081392 // Mdn1 // midasin homolog (yeast) // 4 A5|4 11.4 cM // 100019 /// ENSMUST	Mdn1	NM_001081392	NM_001081392 // RefSeq // Mus musculus midasin homolog (yeast) (Mdn1), mRNA. // chr4 //		7.99122	7.90065	8.45422	8.43978	8.66799	8.1737	8.37467	8.1094	8.40963	8.53113	8.02074	8.15123	8.59593	8.52889	8.89437	8.36667	8.53196	8.22974	8.48895	8.62029	8.6205	8.55057	8.13143	8.37136	8.6656	8.59333	8.57506	8.14382	8.71019	8.15318	8.53859	7.9736	8.27809	8.44072	8.26485	8.57305	8.88866	8.37865	8.76066	8.29159	8.63071
chr4	5644090	6108223	17411575	BC055683 // Fam110b // family with sequence similarity 110, member B // 4 A1|4 // 24229	Fam110b	BC055683	BC055683 // GenBank // Mus musculus family with sequence similarity 110, member B, mRNA		6.76537	6.62185	5.87465	5.88511	6.48249	6.00354	6.26961	6.17867	6.25528	6.02043	5.86714	5.62817	5.82459	5.8329	5.93159	6.05835	5.82377	6.5778	6.06837	6.10833	5.98025	5.7382	6.04929	6.04247	5.93189	6.22728	6.41564	6.45124	5.61282	5.98321	5.88785	5.87323	6.02774	5.84047	6.27016	5.7014	6.13484	5.94367	6.31609	6.18014	5.93475
chr4	47474658	47483242	17413932	NM_024171 // Sec61b // Sec61 beta subunit // 4 B1|4 // 66212 /// ENSMUST00000065678 //	Sec61b	NM_024171	NM_024171 // RefSeq // Mus musculus Sec61 beta subunit (Sec61b), mRNA. // chr4 // 100 /		6.00987	5.46415	5.40462	5.48276	5.74569	5.4539	5.30246	6.06474	5.41997	5.42545	5.0949	5.33241	4.93477	5.34715	5.61456	5.55743	5.14439	5.3375	5.27743	5.56716	5.36702	5.5735	5.41897	5.05837	5.41634	5.3802	5.44637	5.18694	5.29789	6.27469	5.40963	5.4782	5.08385	5.14577	5.25332	5.07498	5.25629	5.1416	5.43284	5.45647	5.03798
chr4	6191098	6221688	17411594	ENSMUST00000029907 // Ubxn2b // UBX domain protein 2B // 4 A1|4 // 68053 /// NM_026534	Ubxn2b	ENSMUST00000029907	ENSMUST00000029907 // ENSEMBL // cdna:known chromosome:NCBIM37:4:6118245:6148835:1 gene		9.1608	8.5251	8.9011	8.59247	8.96216	8.70839	9.1044	8.10373	8.44896	8.24285	8.9599	8.8918	8.79681	9.04809	8.89224	8.93543	8.89956	8.67185	8.54847	9.19175	8.49504	9.42078	8.60632	8.6235	9.14399	9.29288	8.94191	9.10845	9.61191	8.72192	8.97701	8.51249	8.57503	9.28733	8.23147	9.23348	8.83074	8.68776	9.11374	8.75583	9.11273
chr4	48193323	48279589	17425160	NM_029572 // Erp44 // endoplasmic reticulum protein 44 // 4 B1|4 // 76299 /// ENSMUST00	Erp44	NM_029572	NM_029572 // RefSeq // Mus musculus endoplasmic reticulum protein 44 (Erp44), mRNA. //		9.01686	8.83098	8.90542	8.60148	8.92216	8.92436	9.09468	10.7285	10.7409	8.96288	8.95321	8.88832	8.88929	9.09029	8.53698	8.79941	9.0071	8.39034	8.84336	9.09003	10.5458	9.18719	9.74814	9.97338	9.13614	8.90851	9.0889	9.41525	9.07729	10.8329	9.27016	8.86525	8.86701	9.22502	8.77827	9.24661	8.69593	8.67752	8.94828	8.73936	9.05294
chr4	44092632	44109311	17413523	AK035708 // Gm12503 // predicted gene 12503 // 4 B1|4 // 100040313	Gm12503	AK035708	AK035708 // GenBank HTC // Mus musculus adult male urinary bladder cDNA, RIKEN full-len		6.2179	5.85087	6.20871	5.80794	5.86891	5.88529	5.83181	6.06433	6.23514	5.74335	5.81211	5.35499	6.15229	5.81021	6.17686	5.98898	6.05319	5.88726	5.78042	5.81906	6.48469	6.36374	6.05032	6.82655	5.41886	5.70871	5.63226	6.23957	5.48277	6.2071	5.72811	5.90339	5.79971	5.84146	5.93109	5.39446	6.02812	5.74754	5.86184	5.83319	5.74149
chr4	45965334	46034761	17413747	ENSMUST00000102929 // Tdrd7 // tudor domain containing 7 // 4 B1|4 // 100121 /// NM_146	Tdrd7	ENSMUST00000102929	ENSMUST00000102929 // ENSEMBL // cdna:known chromosome:NCBIM37:4:45985105:46047633:1 ge		6.52997	6.30481	5.58516	5.67679	6.06394	6.20258	5.92358	7.26528	7.53381	6.32397	6.23374	6.22527	5.96405	6.17199	6.73313	5.99831	6.2214	6.59391	6.16051	6.38891	7.99203	6.57406	6.47212	7.87654	6.24395	6.31617	5.59255	6.57379	6.41245	7.27547	5.88838	6.17608	5.53725	6.35742	6.29854	5.89533	6.09824	5.60488	7.04762	6.40002	5.99628
chr4	42735545	42846248	17413162	---		---	ENSMUST00000107984 // ENSEMBL // cdna:known chromosome:NCBIM37:4:42749444:42859120:1 ge		6.35889	7.53077	7.37788	6.84615	6.62898	7.32766	6.62198	6.22995	6.02093	6.84541	7.83142	6.82016	7.26787	6.64755	6.14783	7.48971	7.09197	6.36383	7.31379	6.72752	5.53269	6.69151	6.51861	5.76123	5.7346	6.5857	6.90061	6.5566	6.5865	6.60247	7.0111	6.7612	7.18752	6.70251	7.12807	6.95265	6.75326	6.97901	6.93739	6.88676	7.17417
chr4	40269569	40270940	17412759	NR_045265 // 2010003O02Rik // RIKEN cDNA 2010003O02 gene // 4 A5|4 20.24 cM // 10050430	2010003O02Rik	NR_045265	NR_045265 // RefSeq // Mus musculus RIKEN cDNA 2010003O02 gene (2010003O02Rik), non-cod		7.4389	7.44051	7.09719	7.18014	6.86226	6.58427	6.91034	7.75999	7.71334	7.06892	7.01929	6.86695	6.74121	7.20085	7.31753	7.33839	6.72806	6.48706	6.89544	7.21639	7.69717	7.19596	7.63567	7.54139	7.17922	7.1767	7.02158	7.35543	7.14794	7.82029	7.07612	7.02241	7.07315	6.89828	6.78891	7.16698	6.69736	6.9914	7.4813	7.02483	6.61768
chr4	15265820	15286753	17411961	NM_181401 // Tmem64 // transmembrane protein 64 // 4 A2|4 // 100201 /// ENSMUST00000062	Tmem64	NM_181401	NM_181401 // RefSeq // Mus musculus transmembrane protein 64 (Tmem64), mRNA. // chr4 //		10.6284	10.6828	10.2846	10.0739	9.62723	10.0411	10.3809	10.9419	12.0516	10.1697	10.4911	9.98659	10.0673	10.2879	8.74531	10.3892	10.5533	9.53592	9.88509	10.0809	12.0817	10.5813	9.98443	12.0724	10.3705	10.9469	10.2533	9.6234	10.0163	11.4349	9.89359	10.3373	9.8876	10.4184	9.48806	10.1539	9.66404	9.88465	10.2168	10.0527	9.88507
chr4	42979964	42980637	17413211	NM_009503 // Vcp // valosin containing protein // 4 A5|4 23.0 cM // 269523 /// ENSMUST0	Vcp	NM_009503	NM_009503 // RefSeq // Mus musculus valosin containing protein (Vcp), mRNA. // chr4 //		6.67335	6.981	6.57411	6.65976	6.78834	7.39393	6.61533	6.74379	6.71784	7.07154	7.5483	6.63558	7.03934	6.88864	6.45329	6.67482	6.78429	6.44901	6.89132	6.86685	6.81884	6.87496	6.66101	6.44513	6.86418	7.03003	7.10213	7.10401	6.91298	6.64568	7.08914	6.79951	7.01616	6.77673	6.63048	6.8273	6.77552	6.81099	6.834	6.80992	7.33691
chr4	6352105	6357530	17423060	---		---	ENSMUST00000139214 // ENSEMBL // cdna:known chromosome:NCBIM37:4:6279252:6284677:-1 gen		3.19293	3.17403	3.36346	3.34963	3.42824	3.21217	3.51326	3.26753	3.23326	3.40975	3.25886	3.3629	3.85914	3.56636	3.16773	3.06582	3.408	3.46387	3.19475	3.49799	3.2841	3.23104	3.30525	3.19812	3.36591	3.58036	3.53987	3.25084	3.55465	3.39398	3.32384	3.62256	3.50798	3.79144	3.64217	3.55959	3.41413	3.55288	3.3914	3.61288	3.23413
chr4	43058969	43264887	17413221	NM_001081413 // Unc13b // unc-13 homolog B (C. elegans) // 4 B1|4 // 22249 /// NM_02146	Unc13b	NM_001081413	NM_001081413 // RefSeq // Mus musculus unc-13 homolog B (C. elegans) (Unc13b), transcri		9.21741	8.66679	8.65386	8.28645	7.70877	8.43338	8.37738	10.2308	10.0017	7.35066	9.34624	7.34911	8.0695	7.89698	9.27109	8.68489	7.55453	8.93601	8.36646	7.57736	9.87024	8.89326	8.53526	9.83349	8.55456	6.3222	8.1462	7.83772	7.64954	10.1735	7.45008	9.21699	7.83576	8.14786	7.38371	8.90265	7.77616	7.64539	6.75805	6.21775	6.88432
chr4	43441939	43448075	17413325	ENSMUST00000060864 // Tesk1 // testis specific protein kinase 1 // 4|4 A5-C1 // 21754 /	Tesk1	ENSMUST00000060864	ENSMUST00000060864 // ENSEMBL // cdna:known chromosome:NCBIM37:4:43454811:43460936:1 ge		7.25776	6.91306	6.82409	7.51617	6.71059	6.51209	6.8026	7.28155	6.68574	6.69168	6.45197	6.8359	6.5607	6.92919	6.83725	7.17213	7.11297	7.04711	6.38627	7.09097	6.45539	6.46225	6.83117	6.83869	6.82471	6.53266	6.77433	6.81914	6.80719	6.748	6.66493	6.46527	6.83735	7.15196	6.9207	6.66579	6.87211	6.96981	6.77386	6.67254	6.92749
chr4	49059282	49340261	17414045	ENSMUST00000076670 // E130309F12Rik // RIKEN cDNA E130309F12 gene // 4 B1|4 // 272031 /	E130309F12Rik	ENSMUST00000076670	ENSMUST00000076670 // ENSEMBL // cdna:known chromosome:NCBIM37:4:49072154:49353131:1 ge		8.68692	8.24173	8.63659	8.4163	7.85427	8.35011	8.05525	7.11369	6.88749	8.10808	8.50693	8.75752	8.2629	8.5247	7.8735	8.95168	9.09277	8.59135	8.21895	8.22033	6.87116	8.7138	7.74076	7.33657	8.80312	9.16763	8.77421	7.64654	8.69456	6.92985	8.6554	7.65032	8.59238	8.9727	8.30159	8.13539	8.64783	8.91948	8.54753	8.08669	8.76404
chr4	11134097	11134182	17411749	NM_133354 // Sumo2 // SMT3 suppressor of mif two 3 homolog 2 (yeast) // 11 E2|11 // 170	Sumo2	NM_133354	NM_133354 // RefSeq // Mus musculus SMT3 suppressor of mif two 3 homolog 2 (yeast) (Sum		5.85297	6.17016	6.68798	4.51432	6.40527	5.98221	6.5819	5.20523	6.16995	6.61345	6.16736	6.35712	6.3522	7.08688	5.57936	5.09553	6.74113	5.99936	5.97058	6.0273	6.04464	6.629	5.35814	5.8224	6.2341	6.56686	7.34197	6.66095	7.34404	5.63172	6.13394	6.50123	6.72714	6.68735	6.10267	6.56339	6.61544	7.13409	7.2418	6.51741	6.28711
chr4	42772860	42773993	17424461	NM_011124 // Ccl21a // chemokine (C-C motif) ligand 21A (serine) // 4 A5|4 13.3 cM // 1	Ccl21a	NM_011124	NM_011124 // RefSeq // Mus musculus chemokine (C-C motif) ligand 21A (serine) (Ccl21a),		10.6951	8.53011	8.64332	7.2544	7.65751	7.60173	8.01876	9.60914	9.06756	7.06137	7.62717	6.9398	7.13159	8.68789	7.43093	8.14061	7.48203	7.45936	7.07918	7.34364	8.88145	6.84398	8.91131	6.69532	7.74661	7.0859	7.07508	10.1481	7.4385	9.3751	7.13159	7.32295	8.21961	8.89222	9.05275	7.50345	6.81246	7.67984	6.581	7.95924	7.93636
chr4	32251761	32265835	17412395	---		---	AK051132 // GenBank HTC // Mus musculus 12 days embryo spinal ganglion cDNA, RIKEN full		5.39732	5.82133	5.98586	5.07465	5.03335	5.34497	5.87318	4.65097	4.6813	5.43858	5.1186	5.0869	5.58631	5.92788	4.98504	5.87404	5.781	5.45139	5.73814	4.84001	4.83065	6.04453	5.64179	4.46575	6.01572	5.79985	6.26749	5.64313	5.39472	4.74213	6.26866	6.12317	6.42358	5.94919	5.64735	5.85479	5.88386	5.96996	5.89111	5.58398	6.11733
chr4	34006306	34006392	17412636	---		---	ENSMUST00000158789 // ENSEMBL // ncrna:snoRNA chromosome:NCBIM37:4:34093281:34093367:1		3.5553	3.79142	3.88669	3.6891	3.819	3.90568	4.41163	4.42271	3.76714	3.89146	4.13778	3.67518	3.50964	3.40934	5.02556	3.69571	4.12745	3.77523	3.75204	3.38424	3.44682	3.59325	4.30166	3.70315	3.68845	3.69202	3.44088	3.36428	4.34057	3.23772	3.75602	3.91229	3.62189	3.70788	3.86785	3.7602	3.97604	3.91987	3.41885	3.59821	3.47437
chr4	25199908	25242876	17423665	ENSMUST00000108204 // Fhl5 // four and a half LIM domains 5 // 4 A3|4 // 57756 /// NM_0	Fhl5	ENSMUST00000108204	ENSMUST00000108204 // ENSEMBL // cdna:known chromosome:NCBIM37:4:25127055:25170023:-1 g		5.75673	5.81975	5.17206	5.24485	5.30042	4.84079	5.11169	5.69195	5.62491	5.35235	5.31601	5.91171	5.38414	5.07136	5.44808	4.90227	5.13379	6.16897	5.14243	5.26664	5.32374	5.09911	5.7361	5.67336	5.51321	5.22747	5.07004	5.46508	4.83583	5.63666	5.74473	5.89585	4.48319	5.84991	4.92997	5.41111	5.63256	4.94098	5.2637	5.14796	6.00703
chr4	41348996	41390525	17412860	ENSMUST00000072866 // Ubap1 // ubiquitin-associated protein 1 // 4|4 B1 // 67123 /// NM	Ubap1	ENSMUST00000072866	ENSMUST00000072866 // ENSEMBL // cdna:known chromosome:NCBIM37:4:41296029:41337558:1 ge		8.6142	8.91884	9.12436	9.07697	9.00132	8.99061	9.09244	9.15263	9.13854	9.00496	9.32915	8.93798	9.33623	8.7894	8.9364	9.18579	9.19466	8.749	9.07611	9.1993	9.08312	9.13554	8.79692	9.15843	9.09336	9.04646	9.13096	8.64312	9.25403	9.03493	9.11072	8.98209	9.23685	8.91662	9.0793	9.19835	8.72681	9.25429	9.0905	8.93012	9.21895
chr4	7759670	7763930	17411630	NR_040645 // 8430436N08Rik // RIKEN cDNA 8430436N08 gene // 4|4 // 71510	8430436N08Rik	NR_040645	ENSMUST00000127180 // ENSEMBL // havana:lincRNA chromosome:NCBIM37:4:7686817:7691077:1		4.40157	4.30424	4.58541	5.2585	4.62056	4.89886	4.58679	4.64155	4.33148	4.58256	5.23154	4.72148	5.17889	4.52026	4.52513	4.43761	4.77823	4.70833	4.82613	4.31975	4.29923	4.76376	4.23755	5.36937	4.47699	4.50402	4.64444	4.94314	4.79026	4.48978	4.43293	4.78307	4.72404	4.82126	4.96408	4.51361	4.63185	4.94731	4.49315	4.52741	4.73973
chr4	41903577	41904743	17412965	NM_011335 // Ccl21b // chemokine (C-C motif) ligand 21B (leucine) // 4 A5|4 13.3 cM //	Ccl21b	NM_011335	NM_011335 // RefSeq // Mus musculus chemokine (C-C motif) ligand 21B (leucine) (Ccl21b)		10.9136	8.57601	8.72486	7.49154	7.68595	7.69282	8.13533	9.75787	9.13401	7.12948	7.72905	6.87342	7.30133	8.87523	7.39194	8.36868	7.5132	7.49696	7.14615	7.44848	9.22943	6.91308	9.1358	6.67212	7.94025	6.94743	6.87193	10.3285	7.4991	9.49602	7.22479	7.42955	8.29649	9.02051	9.1779	7.51145	6.63191	7.69535	6.53169	7.89754	8.0623
chr4	42114751	42115917	17413025	NM_011335 // Ccl21b // chemokine (C-C motif) ligand 21B (leucine) // 4 A5|4 13.3 cM //	Ccl21b	NM_011335	NM_011335 // RefSeq // Mus musculus chemokine (C-C motif) ligand 21B (leucine) (Ccl21b)		10.9136	8.57601	8.72486	7.49154	7.68595	7.69282	8.13533	9.75787	9.13401	7.12948	7.72905	6.87342	7.30133	8.87523	7.39194	8.36868	7.5132	7.49696	7.14615	7.44848	9.22943	6.91308	9.1358	6.67212	7.94025	6.94743	6.87193	10.3285	7.4991	9.49602	7.22479	7.42955	8.29649	9.02051	9.1779	7.51145	6.63191	7.69535	6.53169	7.89754	8.0623
chr4	42612087	42613253	17413123	NM_011335 // Ccl21b // chemokine (C-C motif) ligand 21B (leucine) // 4 A5|4 13.3 cM //	Ccl21b	NM_011335	NM_011335 // RefSeq // Mus musculus chemokine (C-C motif) ligand 21B (leucine) (Ccl21b)		10.9136	8.57601	8.72486	7.49154	7.68595	7.69282	8.13533	9.75787	9.13401	7.12948	7.72905	6.87342	7.30133	8.87523	7.39194	8.36868	7.5132	7.49696	7.14615	7.44848	9.22943	6.91308	9.1358	6.67212	7.94025	6.94743	6.87193	10.3285	7.4991	9.49602	7.22479	7.42955	8.29649	9.02051	9.1779	7.51145	6.63191	7.69535	6.53169	7.89754	8.0623
chr4	44664415	44685349	17413550	---		---	ENSMUST00000140826 // ENSEMBL // cdna:known chromosome:NCBIM37:4:44677287:44698219:1 ge		5.99432	6.30947	7.21033	6.7856	5.89805	6.14455	6.38704	5.54187	5.33991	6.204	5.94064	6.1987	6.27656	6.3125	5.72744	6.81879	5.98789	6.27012	6.22775	5.87439	5.79381	5.90546	6.10906	5.14777	6.15432	6.23664	6.28712	6.28018	6.14431	5.6432	6.47932	6.55674	6.29895	5.91441	6.56719	5.99199	6.25161	6.71039	5.73556	6.53967	5.827
chr4	5647532	5648868	17411591	XR_107580 // Gm20021 // predicted gene, 20021 // --- // 100504030	Gm20021	XR_107580	AK084183 // GenBank HTC // Mus musculus 12 days embryo eyeball cDNA, RIKEN full-length		6.24385	5.58445	4.47681	4.76372	5.66668	4.76457	5.07514	5.62521	4.78097	4.84174	5.02131	4.39338	4.79201	4.85833	4.52943	4.70322	4.70826	6.46268	4.83462	4.87912	5.26892	4.79567	4.86272	5.19995	4.66872	6.14904	5.69608	5.61806	4.96013	4.89965	4.79062	4.97139	4.67273	5.06606	4.63732	4.82428	5.0493	4.85653	5.83155	4.65451	4.55379
chr4	43588072	43608755	17413399	---		---	ENSMUST00000153232 // ENSEMBL // cdna:known chromosome:NCBIM37:4:43600944:43621627:1 ge		5.71265	5.77661	5.60451	5.30945	5.47886	5.46927	5.33674	5.74166	5.41291	5.39801	5.5768	5.19828	5.5711	5.30689	5.35561	5.35806	5.2936	5.6945	5.45232	5.35259	5.55191	5.48647	5.67269	5.41794	5.43253	5.50294	5.52968	5.45893	5.67344	5.47714	5.24065	5.8425	5.61427	5.32563	5.70374	5.27875	5.32513	5.60076	5.40325	5.58956	5.33558
chr4	22482095	22488366	17423631	NM_008899 // Pou3f2 // POU domain, class 3, transcription factor 2 // 4 A3|4 6.3 cM //	Pou3f2	NM_008899	NM_008899 // RefSeq // Mus musculus POU domain, class 3, transcription factor 2 (Pou3f2		7.27142	5.75154	5.76862	7.00856	7.07161	9.08382	7.237	6.10627	5.84005	6.99863	7.4865	9.00042	7.40272	5.72388	7.18034	9.8968	8.09266	5.89894	7.3621	6.21603	5.96269	7.2268	6.00315	5.30587	5.88798	5.71832	8.55843	5.56197	7.27874	5.65311	8.69024	6.20082	6.98083	8.59388	7.4382	8.76025	7.74677	9.1438	5.32884	5.83573	9.10044
chr4	41517691	41569538	17424263	ENSMUST00000108052 // 2310028H24Rik // RIKEN cDNA 2310028H24 gene // 4 A5|4 // 71901 //	2310028H24Rik	ENSMUST00000108052	ENSMUST00000108052 // ENSEMBL // cdna:known chromosome:NCBIM37:4:41464724:41516570:-1 g		7.83924	8.27576	7.49557	7.52078	7.61402	8.28667	7.7476	6.62967	6.69653	7.90577	7.81639	8.05868	7.64189	7.80519	8.15503	8.19312	7.7912	8.10993	7.77875	8.03527	6.45597	8.15267	7.55584	6.48692	8.07914	8.26645	6.36185	7.77036	7.84681	6.65027	7.45001	8.19877	7.70058	7.72898	8.07498	7.73806	7.1477	7.77516	7.93881	8.35296	8.28573
chr4	43531513	43562691	17424674	NM_011602 // Tln1 // talin 1 // 4 B1|4 // 21894 /// ENSMUST00000030187 // Tln1 // talin	Tln1	NM_011602	NM_011602 // RefSeq // Mus musculus talin 1 (Tln1), mRNA. // chr4 // 100 // 90 // 44 //		9.07256	8.88271	8.0682	8.40822	9.31486	8.63556	8.62562	9.90761	9.6121	9.22537	8.84655	8.64457	8.63947	8.51589	8.90871	8.76798	8.02314	9.17404	8.60536	9.73036	9.6208	8.9169	9.1906	9.43046	8.85304	8.71461	8.1807	8.7953	8.33393	9.45287	8.70395	8.52523	8.40385	8.92584	8.11279	8.48102	8.32001	8.00215	8.32791	8.79564	8.2494
chr4	43631935	43651244	17413403	NM_173788 // Npr2 // natriuretic peptide receptor 2 // 4 B1|4 21.5 cM // 230103 /// ENS	Npr2	NM_173788	NM_173788 // RefSeq // Mus musculus natriuretic peptide receptor 2 (Npr2), mRNA. // chr		7.71975	10.1262	7.72165	8.03504	8.59546	7.61067	9.91971	7.0721	6.71678	9.66708	7.21773	7.40938	7.74966	8.21264	9.00498	9.29783	7.96581	9.08584	9.4728	10.1749	6.32004	7.70117	10.2434	6.81533	9.9062	10.5743	9.22502	10.3844	9.9772	6.87115	8.45054	9.12548	8.15082	8.77776	8.81145	7.82063	10.6856	9.16805	10.9888	10.8951	8.36222
chr4	11051045	11076205	17423215	NM_001085493 // 2310030N02Rik // RIKEN cDNA 2310030N02 gene // 4 A1|4 // 76947 /// ENSM	2310030N02Rik	NM_001085493	NM_001085493 // RefSeq // Mus musculus RIKEN cDNA 2310030N02 gene (2310030N02Rik), mRNA		6.99817	7.4376	7.31972	7.00647	7.09352	7.0142	7.18507	6.55701	6.18069	6.9919	7.07813	6.87667	7.13284	7.30107	6.97411	7.16155	7.55518	6.96902	7.02006	7.2304	5.9732	7.1485	7.10558	6.45025	7.27201	7.3435	7.36763	7.51744	7.53766	6.52641	7.28182	7.51872	7.45693	7.4749	7.21432	7.58215	7.27723	7.36201	7.39761	7.12927	7.46075
chr4	51254170	51254363	17425276	NM_009665 // Amd1 // S-adenosylmethionine decarboxylase 1 // 10 B2|10 25.0 cM // 11702	Amd1	NM_009665	NM_009665 // RefSeq // Mus musculus S-adenosylmethionine decarboxylase 1 (Amd1), mRNA.		10.2133	9.57701	9.57362	9.92417	9.09824	9.66624	9.55274	9.78566	10.9794	9.68273	9.90438	9.16158	9.77181	9.64758	9.51849	9.59293	10.092	8.3882	9.50158	9.23031	10.4179	10.057	9.66797	10.7421	9.24465	9.58835	9.36023	9.23316	9.53716	10.7992	9.86365	9.34303	9.82032	9.60458	8.804	10.087	9.8153	10.4115	9.23679	9.01738	9.56309
chr4	11558920	11615808	17411815	NM_001039556 // Rad54b // RAD54 homolog B (S. cerevisiae) // 4 A1|4 // 623474 /// ENSMU	Rad54b	NM_001039556	NM_001039556 // RefSeq // Mus musculus RAD54 homolog B (S. cerevisiae) (Rad54b), transc		8.85201	8.68894	9.25775	8.70538	8.82947	8.63599	9.01983	7.18761	8.12373	8.7278	8.75601	8.77735	8.9289	9.10813	8.29764	9.22467	8.99916	8.76896	8.85924	9.06165	8.8442	8.77383	8.11971	8.57286	9.36124	9.14557	9.39859	8.52969	9.3982	8.08264	9.47685	8.72392	8.94423	8.88431	8.90367	9.4449	9.3404	8.91228	9.06857	8.97867	9.33001
chr4	8535644	8607778	17411635	ENSMUST00000060232 // Rab2a // RAB2A, member RAS oncogene family // 4 A1|4 // 59021 ///	Rab2a	ENSMUST00000060232	ENSMUST00000060232 // ENSEMBL // cdna:known chromosome:NCBIM37:4:8462791:8534925:1 gene		11.6112	11.5784	11.8592	11.0983	11.4717	11.6767	11.7767	11.2475	11.2786	11.4154	11.7163	11.7308	11.6967	11.6314	11.2309	11.5185	11.8977	11.3742	11.631	11.5289	11.3399	11.827	11.4601	11.2985	11.6966	11.6	11.6404	11.5575	11.5773	11.5482	11.759	11.7344	11.9188	11.7605	11.9197	11.825	11.6074	11.7825	11.8113	11.5718	11.8258
chr4	8690470	8867659	17411647	ENSMUST00000051558 // Chd7 // chromodomain helicase DNA binding protein 7 // 4 A1|4 1.0	Chd7	ENSMUST00000051558	ENSMUST00000051558 // ENSEMBL // cdna:known chromosome:NCBIM37:4:8618512:8794806:1 gene		11.3249	11.1386	11.6909	11.3499	11.2022	11.5927	11.6092	8.40134	9.29303	10.5098	11.0441	11.4133	11.8098	11.681	11.589	11.4842	11.6823	11.8755	11.4603	11.2766	9.27789	10.8987	9.6818	9.5713	11.4768	9.99483	11.7883	10.2905	10.5285	9.57981	11.8351	11.4879	11.7907	11.5619	11.6637	11.6619	11.6266	11.6298	11.54	11.0802	11.5044
chr4	44524748	44529159	17424880	XR_106259 // Gm19980 // predicted gene, 19980 // --- // 100503944	Gm19980	XR_106259	AK040987 // GenBank HTC // Mus musculus adult male aorta and vein cDNA, RIKEN full-leng		6.16584	5.23527	5.31723	5.29805	4.86302	4.8668	5.2982	5.28827	4.78551	4.93937	4.88385	5.15197	4.69439	6.12609	4.5735	8.33535	5.23112	6.1868	5.24138	4.60123	4.94606	5.01162	5.49041	4.83574	5.4853	4.97898	5.91044	4.94155	5.17159	5.03153	4.99086	5.36801	5.11956	6.02711	4.68077	4.83702	5.98697	6.15664	4.52968	5.59277	4.61918
chr4	12089370	12096271	17411885	NM_198957 // C430048L16Rik // RIKEN cDNA C430048L16 gene // 4 A1|4 // 77604 /// ENSMUST	C430048L16Rik	NM_198957	NM_198957 // RefSeq // Mus musculus RIKEN cDNA C430048L16 gene (C430048L16Rik), mRNA. /		6.88905	8.24188	8.24702	7.64114	7.88724	7.5981	8.38829	7.76948	7.86447	8.32844	8.30961	8.16727	7.63403	8.42359	7.24232	7.44501	8.3083	7.87273	8.09657	8.00931	8.15305	8.20324	8.03032	8.08805	8.55897	8.63587	8.18052	8.41064	8.52121	8.12222	8.27534	8.67729	8.21193	8.39449	8.43327	8.26694	8.40926	8.27525	8.0775	8.39827	8.9055
chr4	32982998	33022180	17412539	NM_027491 // Rragd // Ras-related GTP binding D // 4 A5|4 11.4 cM // 52187 /// ENSMUST0	Rragd	NM_027491	NM_027491 // RefSeq // Mus musculus Ras-related GTP binding D (Rragd), mRNA. // chr4 //		8.33401	8.02699	7.99944	8.06064	7.34751	8.36426	7.84185	7.52326	5.71412	7.26593	7.93834	7.8891	8.39073	7.8553	7.39104	8.24869	8.18314	8.08555	7.89956	7.74028	7.75284	8.25293	7.63518	4.98402	8.25362	7.70459	7.98497	7.37468	7.75367	8.27895	8.17965	8.4269	8.27711	8.0802	8.29988	8.35268	7.54143	7.95022	7.88714	7.67896	7.42556
chr4	6688169	6704160	17411621	---		---	ENSMUST00000137749 // ENSEMBL // cdna:known chromosome:NCBIM37:4:6615316:6631307:1 gene		4.64346	4.31283	4.72828	5.22102	4.90104	5.04739	4.52179	4.18777	4.42358	4.13685	5.10069	4.69532	5.47561	4.29621	4.51997	4.69868	4.54029	4.3628	4.65766	4.33847	4.39711	4.83422	4.45371	4.26323	4.33469	4.1976	4.28282	4.50282	4.37985	4.05824	4.61606	4.32197	5.13965	4.67212	4.79354	5.05277	4.79321	4.58573	4.43042	4.42234	4.23078
chr4	11191351	11204779	17411761	NM_009830 // Ccne2 // cyclin E2 // 4|4 A2 // 12448 /// ENSMUST00000029866 // Ccne2 // c	Ccne2	NM_009830	NM_009830 // RefSeq // Mus musculus cyclin E2 (Ccne2), transcript variant 2, mRNA. // c		10.1378	10.4014	10.5606	10.4083	10.1997	10.309	10.6357	8.3919	9.35074	10.7639	10.5586	10.5594	10.617	10.8391	9.98868	10.3741	10.7458	10.3364	10.1827	10.4332	9.78719	10.3634	9.78608	9.81708	10.6098	10.4297	10.5296	10.5037	10.7828	9.41494	10.4593	10.5202	10.2235	10.5889	10.556	10.5491	10.4968	10.4485	10.3754	10.1249	10.6289
chr4	41135743	41193380	17412850	ENSMUST00000040008 // Ube2r2 // ubiquitin-conjugating enzyme E2R 2 // 4|4 B1 // 67615 /	Ube2r2	ENSMUST00000040008	ENSMUST00000040008 // ENSEMBL // cdna:known chromosome:NCBIM37:4:41082776:41140413:1 ge		10.6917	10.5499	10.2149	10.3068	10.4105	10.0083	10.3713	10.5278	10.5896	10.2669	9.52232	10.2561	10.0307	10.4374	10.0871	10.5127	10.247	10.1367	10.0639	10.3336	10.2795	10.1975	10.5976	10.3765	10.5221	10.4089	10.3387	10.521	10.478	10.3128	10.271	10.2439	10.2039	10.4678	10.3074	10.229	10.1552	10.2962	10.4555	10.5757	10.463
chr4	32804035	32950841	17423756	NM_001012450 // Ankrd6 // ankyrin repeat domain 6 // 4 A5|4 // 140577 /// NM_080471 //	Ankrd6	NM_001012450	NM_001012450 // RefSeq // Mus musculus ankyrin repeat domain 6 (Ankrd6), transcript var		7.29408	7.00271	7.71977	7.51416	6.9716	8.40953	7.41006	6.72464	7.11074	6.7767	8.60031	7.87378	7.18119	6.60807	8.26372	7.51467	7.31547	6.67357	6.95465	7.14764	8.2807	7.76853	6.26188	7.35638	6.68101	7.08281	7.5066	6.58486	7.17595	7.41048	7.61867	6.9971	6.55739	6.96268	6.79291	7.07254	7.49028	7.1639	6.51986	6.36397	6.6426
chr4	46376975	46389437	17425018	NM_029086 // 5830415F09Rik // RIKEN cDNA 5830415F09 gene // 4|4 B2 // 74753 /// ENSMUST	5830415F09Rik	NM_029086	NM_029086 // RefSeq // Mus musculus RIKEN cDNA 5830415F09 gene (5830415F09Rik), mRNA. /		6.58345	7.00178	6.88611	6.69594	6.95579	6.97131	6.6428	6.38178	6.4822	6.96038	6.8974	6.96926	6.77303	6.82761	6.64426	7.06779	7.02967	6.88287	6.86542	6.68712	6.71147	6.89354	6.85146	6.5286	6.88615	6.90561	7.0405	6.65602	6.96266	6.34845	6.939	6.87533	6.87483	6.69821	6.58441	6.88375	6.94222	6.91876	7.08119	7.1869	6.91812
chr4	28813131	28967499	17412296	NM_010141 // Epha7 // Eph receptor A7 // 4 A4|4 1.9 cM // 13841 /// ENSMUST00000029964	Epha7	NM_010141	NM_010141 // RefSeq // Mus musculus Eph receptor A7 (Epha7), transcript variant 1, mRNA		9.96653	8.88081	8.91993	9.06284	8.52368	9.14923	8.78087	5.56599	5.48771	7.43594	8.92135	9.13737	9.05256	9.02322	8.34023	9.30376	9.17244	9.06536	8.97486	9.67403	5.6506	9.36165	7.94896	6.68249	9.66668	9.62832	9.10454	7.39546	8.64024	7.3503	8.83449	9.33163	8.1245	9.46205	8.78716	9.63037	8.59633	8.85293	8.61528	8.97869	9.02452
chr4	46118180	46118446	17413787	---		---	ENSMUST00000157444 // ENSEMBL // ncrna:misc_RNA chromosome:NCBIM37:4:46131052:46131318:		3.26866	3.24989	3.45477	3.18813	3.3302	3.60301	3.50785	3.71103	3.34589	3.4068	3.61534	3.4245	3.46536	3.12897	3.60086	4.02836	3.2676	3.46705	3.15072	3.62167	3.54185	3.26186	3.62911	3.32024	3.20093	3.29018	3.36665	3.24628	3.2845	3.28737	3.38805	3.61193	3.31067	3.54227	3.5085	3.27988	3.87853	3.40321	3.63752	3.71614	3.30606
chr4	41520694	41525823	17412879	---		---	AK086793 // GenBank HTC // Mus musculus 0 day neonate lung cDNA, RIKEN full-length enri		6.19397	6.41281	6.36519	5.98794	6.42428	6.57519	6.41702	6.35606	6.16048	6.26661	6.64269	6.14025	6.68919	6.1567	6.29511	6.00038	6.34244	6.45831	6.49133	6.27887	6.34495	6.55284	6.33049	6.09397	6.08377	6.40896	6.32094	6.26246	6.46432	6.2198	6.38541	6.51616	6.90765	6.34842	6.51057	6.35727	6.26342	6.29465	6.40676	6.41918	6.14607
chr4	42255659	42256825	17413078	NM_011335 // Ccl21b // chemokine (C-C motif) ligand 21B (leucine) // 4 A5|4 13.3 cM //	Ccl21b	NM_011335	NM_011335 // RefSeq // Mus musculus chemokine (C-C motif) ligand 21B (leucine) (Ccl21b)		11.1714	8.6628	8.8234	7.51815	7.78453	7.89129	8.21697	10.175	9.23883	7.13012	7.85607	6.8064	7.35615	8.99767	7.58803	8.36822	7.63657	7.52188	7.35825	7.29473	9.32801	6.87441	9.07385	6.37355	7.95744	7.05755	7.06587	10.4193	7.74876	9.68537	7.22414	7.27047	8.40053	9.24207	9.35864	7.61713	6.80137	7.93536	6.58914	7.93653	8.13253
chr4	42714926	42719893	17413158	NR_033123 // 4933409K07Rik // RIKEN cDNA 4933409K07 gene // 4 A5|4 // 108816 /// NR_033	4933409K07Rik	NR_033123	NR_033123 // RefSeq // Mus musculus RIKEN cDNA 4933409K07 gene (4933409K07Rik), non-cod		7.03952	8.69792	8.26118	7.56731	7.89411	8.19487	7.62152	6.69165	5.82405	7.11302	8.55985	6.87734	8.25341	8.23814	7.31038	8.95549	8.09717	7.2498	7.46126	7.78513	6.00055	7.7078	7.5638	6.47743	7.6358	7.28079	5.77539	7.45621	8.21477	5.86503	7.66232	8.4929	8.291	8.27277	7.8688	7.70703	6.8365	7.9035	7.29026	7.64935	9.07273
chr4	41390745	41464887	17424219	NM_024241 // Kif24 // kinesin family member 24 // 4|4 B1 // 109242 /// ENSMUST000001080	Kif24	NM_024241	NM_024241 // RefSeq // Mus musculus kinesin family member 24 (Kif24), mRNA. // chr4 //		7.30354	7.56179	7.74622	7.56157	7.80852	7.63428	7.78053	6.49146	7.24451	7.28308	7.73229	7.80635	7.80883	7.56836	7.73043	7.68707	7.54858	8.06067	7.55426	7.61115	7.45859	7.73186	7.0459	7.63871	7.85131	7.98253	8.04952	7.24779	7.71855	6.90351	8.05857	7.74933	7.46089	7.41266	7.66964	7.99134	7.9742	7.51111	7.91631	7.79316	7.71534
chr4	40735649	40757923	17424057	NM_021535 // Smu1 // smu-1 suppressor of mec-8 and unc-52 homolog (C. elegans) // 4 A5|	Smu1	NM_021535	NM_021535 // RefSeq // Mus musculus smu-1 suppressor of mec-8 and unc-52 homolog (C. el		7.88295	7.99959	8.24112	7.79945	7.76387	7.98681	8.31492	7.45225	7.89093	8.19402	8.24171	8.00513	8.09197	7.947	7.82164	7.99499	8.26225	7.62946	8.17934	8.12549	8.12586	8.17966	7.95841	8.20548	8.02617	8.17275	8.43263	7.77894	8.23639	7.84932	8.28434	7.95287	8.44354	8.08188	7.97639	8.47348	8.07827	8.39452	8.31019	8.02508	8.14712
chr4	19608303	19708993	17423544	ENSMUST00000108246 // Wwp1 // WW domain containing E3 ubiquitin protein ligase 1 // 4 A	Wwp1	ENSMUST00000108246	ENSMUST00000108246 // ENSEMBL // cdna:known chromosome:NCBIM37:4:19535450:19636140:-1 g		9.69056	9.49449	9.03324	8.96018	9.50282	9.4755	9.51245	10.2914	10.3449	9.2266	9.48683	9.55696	9.47423	9.51062	9.21501	9.44403	9.51011	9.55902	9.12559	9.55488	10.3531	9.58089	10.0882	10.0742	9.23621	8.9056	9.32844	9.96401	9.33266	10.7414	9.51813	9.24584	9.18849	9.80668	9.49855	10.0037	9.57514	9.27723	8.84951	8.8393	9.68623
chr4	34614957	34660167	17412653	NM_181406 // Rars2 // arginyl-tRNA synthetase 2, mitochondrial // 4 A5|4 // 109093 ///	Rars2	NM_181406	NM_181406 // RefSeq // Mus musculus arginyl-tRNA synthetase 2, mitochondrial (Rars2), n		8.12372	8.41501	8.28904	8.22852	7.99047	7.80992	8.34358	8.49836	8.77642	8.12612	8.10957	8.2974	8.01248	8.47864	8.13463	8.41424	8.10948	8.13305	7.99691	8.40207	8.67602	8.30957	8.3866	8.86251	8.69024	8.46594	8.2489	8.27473	8.34503	8.74618	8.45181	7.82899	8.18753	8.35726	8.04405	8.49049	8.40788	8.13775	8.3314	8.02442	8.51603
chr4	45500485	45500552	17424966	---		---	ENSMUST00000158267 // ENSEMBL // ncrna:miRNA chromosome:NCBIM37:4:45513357:45513424:-1		5.28015	5.84518	5.30879	5.25296	5.83769	5.56496	6.08273	6.33663	6.50464	6.66083	5.19964	5.25776	5.2653	5.57742	4.846	5.56362	5.32341	4.7867	5.27966	5.62322	6.52305	5.33669	6.0731	6.2825	5.9609	6.03145	5.34845	5.57044	6.14798	6.27285	5.48998	5.47611	5.40493	5.40232	5.66935	5.36925	5.13771	5.10172	5.71099	5.63996	5.01664
chr4	48539935	48561920	17414009	NM_001145924 // 5730528L13Rik // RIKEN cDNA 5730528L13 gene // 4|4 B2 // 66665 /// NM_0	5730528L13Rik	NM_001145924	NM_001145924 // RefSeq // Mus musculus RIKEN cDNA 5730528L13 gene (5730528L13Rik), tran		7.90134	8.01443	7.71867	7.88408	7.48295	7.7603	7.98579	6.9018	6.85521	7.34109	7.40389	7.69459	7.76664	7.80189	7.56338	8.30763	8.18529	7.70655	7.55923	7.69967	6.9148	7.82543	7.38926	7.14034	8.0146	7.84687	8.13348	7.48041	7.79856	6.88378	7.97621	7.614	8.06831	7.87112	7.86404	8.0905	8.22514	8.28905	7.77377	7.87416	8.23379
chr4	10845500	10845630	17423207	NR_037304 // Mir3471-1 // microRNA 3471-1 // --- // 100499521 /// NR_037304 // Mir3471-	Mir3471-1	NR_037304	NR_037304 // RefSeq // Mus musculus microRNA 3471-1 (Mir3471-1), microRNA. // chr4 // 1		4.38442	4.75066	4.79104	4.19095	4.81125	5.69132	4.35933	4.28209	4.03018	4.5533	5.93669	4.69697	6.04532	4.21818	4.75822	4.40557	4.83102	4.9543	5.19725	4.80696	5.17682	5.0013	4.92624	4.38881	4.08179	4.54474	5.58377	4.2789	4.80138	3.87102	4.60985	4.74037	5.50237	4.62627	5.30909	4.5357	5.14405	4.3958	4.95807	4.56511	4.14477
chr4	40722150	40737153	17412774	NM_001164671 // Dnaja1 // DnaJ (Hsp40) homolog, subfamily A, member 1 // 4 A5|4 // 1550	Dnaja1	NM_001164671	NM_001164671 // RefSeq // Mus musculus DnaJ (Hsp40) homolog, subfamily A, member 1 (Dna		8.72967	8.31661	8.6536	8.59367	8.46406	8.56363	8.67558	8.38202	8.37282	8.41656	8.55855	8.62158	8.39376	8.5624	8.2925	8.70224	8.71639	8.3187	8.55822	8.63055	8.79204	8.82286	8.29753	8.41741	8.69279	8.54994	8.78081	8.31133	8.72775	8.23387	8.74902	8.575	8.70823	8.53431	8.61252	8.67715	8.51245	8.66236	8.65229	8.41041	8.81936
chr4	41517437	41518929	17412875	NR_045726 // 1700066J24Rik // RIKEN cDNA 1700066J24 gene // 4 A5|4 // 76992	1700066J24Rik	NR_045726	NR_045726 // RefSeq // Mus musculus RIKEN cDNA 1700066J24 gene (1700066J24Rik), non-cod		4.34186	4.94714	4.89964	4.70974	5.07935	5.2408	4.72459	4.54209	4.24224	4.42101	4.94781	5.15485	5.39137	4.55312	4.41014	4.55697	4.66791	4.68779	4.94442	4.62215	4.25556	4.95994	4.88022	4.36965	4.57198	4.53929	4.44118	4.68074	4.26833	4.45582	4.50649	4.37749	4.96734	4.58409	4.85554	4.75742	4.97401	4.82173	5.07605	5.09291	4.64372
chr4	43957401	43979118	17413500	ENSMUST00000030202 // Glipr2 // GLI pathogenesis-related 2 // 4 B1|4 // 384009 /// NM_0	Glipr2	ENSMUST00000030202	ENSMUST00000030202 // ENSEMBL // cdna:known chromosome:NCBIM37:4:43970273:43991990:1 ge		7.22751	7.49984	7.11965	7.26581	7.21026	7.33981	7.43802	6.70692	7.07919	6.34596	6.52739	8.43871	7.31292	6.90693	7.02141	8.23911	7.17801	7.17634	7.69121	7.20458	6.69174	7.82887	7.37092	6.63813	7.11506	8.31539	7.29781	6.92675	7.81286	6.81441	7.11874	7.22154	7.49196	7.50333	6.00882	7.02438	7.26557	6.81039	8.08364	8.19989	6.88963
chr4	24898083	24905001	17412272	NM_026742 // Ndufaf4 // NADH dehydrogenase (ubiquinone) 1 alpha subcomplex, assembly fa	Ndufaf4	NM_026742	NM_026742 // RefSeq // Mus musculus NADH dehydrogenase (ubiquinone) 1 alpha subcomplex,		8.08556	7.96043	7.94604	8.08895	7.87373	7.94704	8.19278	7.42984	7.54468	8.10095	7.94931	8.35735	8.13317	8.19736	7.86948	8.22343	8.63854	7.59562	7.70682	8.15776	7.58497	8.36286	7.70502	7.45169	8.10007	7.92826	8.47414	8.23332	8.45299	7.57931	8.36795	7.96791	8.0989	8.18834	7.66914	8.39022	8.15531	8.19376	8.30148	7.6882	8.61425
chr4	12906837	12981485	17411907	NM_173746 // Gm11818 // predicted gene 11818 // 4 A1|4 // 208820 /// NM_001171801 // Gm	Gm11818	NM_173746	NM_173746 // RefSeq // Mus musculus predicted gene 11818 (Gm11818), transcript variant		7.0088	7.32904	7.24253	6.44015	6.83016	7.03414	7.06603	7.36557	8.37936	6.52935	6.69874	7.13109	7.12903	7.24021	7.13633	7.36963	6.88071	6.66037	6.55537	6.41776	7.65567	6.75522	6.89068	8.55183	6.67231	7.31813	6.62831	6.98196	7.07988	8.4463	8.84895	6.60404	7.18148	7.21324	7.72026	6.67154	6.83101	7.08106	7.0403	6.64893	7.36403
chr4	45809468	45826923	17424972	ENSMUST00000044297 // Igfbpl1 // insulin-like growth factor binding protein-like 1 // 4	Igfbpl1	ENSMUST00000044297	ENSMUST00000044297 // ENSEMBL // cdna:known chromosome:NCBIM37:4:45822340:45839795:-1 g		6.32314	6.98999	5.67441	5.96458	6.9699	6.11637	7.92765	5.59174	5.39342	9.23917	6.03165	6.21662	6.18745	5.65475	6.48255	7.03047	6.02707	6.96634	7.14035	6.84128	5.86955	5.86037	8.33465	5.79515	7.52215	7.64107	9.18364	6.8085	9.23068	5.61928	6.21441	6.67758	6.07321	6.00872	5.90138	5.87819	7.32519	6.81144	7.98068	8.6324	6.00548
chr4	44943753	44948330	17413567	---		---	ENSMUST00000154177 // ENSEMBL // havana:lincRNA chromosome:NCBIM37:4:44956625:44961202:		5.28061	5.03332	5.31165	4.72849	5.33369	5.25937	5.23841	5.32563	5.10823	5.13692	5.43593	5.13282	5.20526	5.41519	5.43385	5.15837	5.25457	5.28603	5.26908	5.17749	5.17905	5.40631	5.20822	5.23544	5.05575	4.94488	5.4693	5.40429	5.34802	5.17631	5.30488	5.20475	5.39446	5.20819	5.60058	5.13188	5.71153	5.18115	5.23585	5.20134	5.2512
chr4	21757382	21767212	17423622	NM_029840 // 2610029I01Rik // RIKEN cDNA 2610029I01 gene // 4 A3|4 // 77032 /// ENSMUST	2610029I01Rik	NM_029840	NM_029840 // RefSeq // Mus musculus RIKEN cDNA 2610029I01 gene (2610029I01Rik), mRNA. /		6.8359	7.59104	7.18102	6.91917	7.14705	7.18719	7.52561	7.07729	6.51863	7.48703	6.96965	7.65699	6.88332	7.35739	7.24996	7.37656	7.44629	7.47301	7.18775	7.40688	6.55514	7.0709	7.29357	6.43214	8.09429	7.82156	7.59795	7.4191	7.87574	6.48673	7.18162	7.57411	6.90697	7.48061	7.09208	7.28034	7.46968	7.50752	7.9328	7.7688	7.98075
chr4	15997121	16013888	17423479	NM_145950 // Osgin2 // oxidative stress induced growth inhibitor family member 2 // 4 A	Osgin2	NM_145950	NM_145950 // RefSeq // Mus musculus oxidative stress induced growth inhibitor family me		7.74718	8.2399	8.28347	7.78961	7.87462	8.09404	8.35997	7.32777	8.01996	8.18487	7.92202	8.13219	8.18811	8.27847	7.41348	8.10134	8.49271	7.72292	8.21964	7.9972	8.47421	8.36972	7.83352	8.33891	8.0784	8.2868	8.55221	8.15805	8.48376	7.84893	8.45431	7.96671	8.19726	8.22883	8.27169	8.42085	8.51491	8.47999	8.4187	8.13863	8.60608
chr4	52430284	52438965	17425284	NR_045175 // 2700081L22Rik // RIKEN cDNA 2700081L22 gene // 4 B2|4 // 72648	2700081L22Rik	NR_045175	NR_045175 // RefSeq // Mus musculus RIKEN cDNA 2700081L22 gene (2700081L22Rik), non-cod		3.80418	3.71065	3.97889	3.98083	3.7158	3.7794	3.67401	3.6834	3.57727	3.62041	3.66691	3.75187	3.47578	3.78249	3.83737	4.18866	3.70759	3.41834	3.53086	3.84849	3.64539	3.5259	3.22746	3.66882	3.98316	3.66107	3.85447	3.71744	3.91858	3.46298	4.31996	3.47788	3.70762	3.90369	3.65976	3.96707	3.55212	3.74665	3.86976	3.56703	3.84869
chr4	46535901	46539802	17413847	NM_178893 // Coro2a // coronin, actin binding protein 2A // 4 B1|4 // 107684 /// NM_001	Coro2a	NM_178893	NM_178893 // RefSeq // Mus musculus coronin, actin binding protein 2A (Coro2a), transcr		5.97232	5.96568	5.81135	5.78063	5.8862	6.23214	6.12826	6.71197	6.58164	6.13929	6.4336	5.97966	6.28583	6.07919	5.80166	5.98786	6.00411	5.80199	5.99476	5.91132	6.22718	5.89429	5.91855	6.14855	5.95845	5.92393	5.96937	5.80564	5.93189	6.21749	5.87641	6.06244	6.03305	6.13863	5.84319	5.96524	5.72435	5.92399	5.67748	6.12064	5.57633
chr4	47353222	47414931	17413915	NM_009370 // Tgfbr1 // transforming growth factor, beta receptor I // 4 B1|4 19.3 cM //	Tgfbr1	NM_009370	NM_009370 // RefSeq // Mus musculus transforming growth factor, beta receptor I (Tgfbr1		8.8578	9.17978	9.70128	9.47133	9.33155	9.29218	9.40909	8.73973	9.02488	8.82332	9.43101	9.19593	9.3811	9.59099	9.12446	9.11744	9.51989	9.24065	9.50836	9.28192	8.69247	9.33909	9.05771	8.47564	9.14532	8.96944	9.68804	9.36603	9.2983	8.88658	9.59812	9.2264	9.71813	9.4143	9.58978	9.40198	9.30371	9.29165	8.97981	8.78122	8.99791
chr4	9210003	9210108	17411695	---		---	ENSMUST00000082782 // ENSEMBL // ncrna:snRNA chromosome:NCBIM37:4:9137150:9137255:1 gen		5.05759	4.45721	4.81871	5.12641	4.73056	4.76781	4.53135	5.48402	5.49777	5.07608	4.84764	5.11656	4.62497	4.91136	5.67676	5.39375	5.23959	5.01409	4.59529	4.49894	4.9817	4.51453	4.48417	5.47631	4.79376	4.74424	4.4634	5.66288	4.39778	4.90584	5.19317	4.69771	4.58603	5.00907	4.73268	4.40598	5.38047	5.33493	4.07443	5.10169	5.5913
chr4	22357543	22434091	17412213	NM_172988 // Fbxl4 // F-box and leucine-rich repeat protein 4 // 4 A3|4 // 269514 /// E	Fbxl4	NM_172988	NM_172988 // RefSeq // Mus musculus F-box and leucine-rich repeat protein 4 (Fbxl4), mR		6.9169	7.63944	7.0603	7.17864	6.60388	7.39764	7.36946	7.41337	7.34325	7.28171	7.03351	7.72188	7.09022	7.17197	6.83352	7.63838	6.99503	7.33885	7.08472	7.29232	7.49681	7.17223	7.14192	7.87701	7.3311	7.11687	7.37775	7.2335	7.33331	7.48769	7.28399	7.27886	7.4375	6.97135	7.61395	7.20431	7.08004	7.42978	7.43718	7.44104	7.23451
chr4	44412469	44412595	17424878	---		---	ENSMUST00000104399 // ENSEMBL // ncrna:snoRNA chromosome:NCBIM37:4:44425341:44425467:-1		3.78164	4.3548	3.7606	3.86163	4.29685	3.55617	3.96283	4.41901	4.16142	4.11397	4.08182	3.81552	3.85728	3.42148	4.07465	4.10313	3.86519	4.09023	3.98721	3.77105	4.22489	3.64599	3.85037	3.85855	4.17079	3.88357	4.10824	4.00952	4.31699	4.22956	3.83327	3.77935	4.16516	3.65843	4.14833	3.93938	4.22415	4.08065	3.90588	3.79862	3.80703
chr4	49489418	49506558	17425221	NM_007519 // Baat // bile acid-Coenzyme A: amino acid N-acyltransferase // 4 B1|4 22.7	Baat	NM_007519	NM_007519 // RefSeq // Mus musculus bile acid-Coenzyme A: amino acid N-acyltransferase		4.70982	4.76603	4.67638	4.65027	4.76894	4.85696	4.74606	4.8482	4.64622	4.91359	5.01802	4.546	4.87972	4.5809	5.01589	4.75955	4.64448	4.85139	4.74223	4.76808	4.575	4.74893	4.74516	4.5877	4.74048	4.78945	4.67612	4.6487	4.62897	4.52296	4.47442	4.64586	4.65985	4.7631	4.73378	4.77765	4.67791	5.0043	4.78653	4.69417	4.67836
chr4	33031416	33052364	17412552	NM_019586 // Ube2j1 // ubiquitin-conjugating enzyme E2J 1 // 4 A5|4 // 56228 /// ENSMUS	Ube2j1	NM_019586	NM_019586 // RefSeq // Mus musculus ubiquitin-conjugating enzyme E2J 1 (Ube2j1), mRNA.		9.84324	9.85236	9.63146	9.44326	9.84689	9.60644	9.78996	10.1553	9.86442	9.98325	9.3339	9.56105	9.39196	9.67371	9.8679	9.53966	9.73886	9.55363	9.42173	9.66879	9.82747	9.55536	9.63274	9.61388	9.67359	9.62644	9.63646	9.8189	9.45349	10.1823	9.56494	9.95817	9.61049	9.6766	9.58766	9.46397	9.54087	9.63305	9.94798	10.0263	9.59017
chr4	34683879	34684185	17412679	---		---	ENSMUST00000157713 // ENSEMBL // ncrna:misc_RNA chromosome:NCBIM37:4:34631128:34631434:		5.71477	6.49089	5.43629	5.87335	5.79561	5.57371	5.67963	5.86521	5.52803	5.85694	5.47793	5.38376	5.69888	5.66789	5.29711	5.35416	5.70428	5.63542	5.60722	5.49008	5.56653	5.48779	5.66197	5.71114	5.38639	5.71652	5.82002	5.74212	5.85771	5.65523	5.11275	6.84437	5.84682	5.77825	5.7999	5.60079	5.69761	6.06529	5.70155	5.75205	5.68847
chr4	42848071	42853888	17424476	---		---	ENSMUST00000107979 // ENSEMBL // cdna:putative chromosome:NCBIM37:4:42860943:42866760:-		5.88216	5.76748	5.91903	6.02932	5.42782	5.87442	6.00874	5.3745	5.9317	5.75879	6.53793	5.46135	5.94532	5.89804	5.29201	6.13481	6.0507	5.11523	5.69223	5.60276	5.61915	5.74522	5.56892	5.28097	5.42797	5.7504	5.70938	5.69872	6.43463	6.25101	6.17658	6.1019	6.08057	5.96198	5.72285	6.21294	5.49885	5.70423	5.57699	5.65646	5.82406
chr4	47920755	47920897	17413940	---		---	ENSMUST00000158724 // ENSEMBL // ncrna:snoRNA chromosome:NCBIM37:4:47933627:47933769:1		4.24968	3.86034	4.43665	3.89473	3.96262	4.50705	4.28932	3.78666	3.97207	4.57685	4.08793	4.1805	4.05218	3.99632	4.26343	4.12929	4.45078	4.09538	4.48717	4.25417	4.12993	4.54111	4.34502	3.95736	3.99099	4.23508	4.44454	4.23664	4.30515	4.26	4.33606	4.16252	3.90492	4.00566	4.20986	4.29261	4.45985	4.0569	4.09367	4.29926	4.13076
chr4	11966565	11994295	17411871	NR_040577 // 1700123M08Rik // RIKEN cDNA 1700123M08 gene // 4 A1|4 // 100503636	1700123M08Rik	NR_040577	NR_040577 // RefSeq // Mus musculus RIKEN cDNA 1700123M08 gene (1700123M08Rik), non-cod		5.03603	5.55479	5.23088	5.51158	5.45391	5.36276	5.28199	5.05116	5.11583	5.08232	5.78185	5.35341	5.52656	5.25417	5.02896	5.67941	5.31747	5.23061	5.26312	5.29317	5.58162	5.45946	5.27716	5.52404	5.64285	5.52063	5.44286	5.33255	5.61289	5.26202	5.64714	5.676	5.44228	5.14604	5.46291	5.64133	5.55269	5.21511	5.6957	5.32942	5.90395
chr4	41755228	41759125	17412932	NM_016658 // Galt // galactose-1-phosphate uridyl transferase // 4 A5|4 19.9 cM // 1443	Galt	NM_016658	NM_016658 // RefSeq // Mus musculus galactose-1-phosphate uridyl transferase (Galt), mR		7.31982	7.28385	7.23468	7.26236	6.92489	6.6	6.72597	7.36586	7.47922	7.13831	6.96533	7.10496	6.49055	7.21991	6.85911	7.60872	7.44215	7.57647	6.96681	7.24305	7.10643	6.83563	7.15868	7.25954	6.89594	7.38363	6.46045	7.50837	6.93051	7.33299	6.7089	7.52662	7.14182	6.96606	7.05149	6.43608	6.54828	7.28295	6.36823	7.34625	7.53889
chr4	41769467	41774247	17424331	NM_001164044 // Ccl27a // chemokine (C-C motif) ligand 27A // 4 A5|4 13.3 cM // 20301 /	Ccl27a	NM_001164044	NM_001164044 // RefSeq // Mus musculus chemokine (C-C motif) ligand 27A (Ccl27a), trans		6.62756	6.38756	6.60647	4.6785	6.40523	5.97511	6.43272	5.75464	6.11085	6.07581	5.94895	6.25058	5.913	6.55249	5.83013	5.8197	6.6658	6.28733	6.24768	6.00581	5.59851	6.50685	5.87025	5.69286	6.0543	6.70272	6.51861	6.20449	6.50854	5.72978	6.48752	6.43822	6.0742	6.18314	6.0104	6.40528	5.87521	6.64263	6.44162	5.98992	6.4675
chr4	45012830	45014399	17413587	---		---	ENSMUST00000095105 // ENSEMBL // cdna:known chromosome:NCBIM37:4:45025702:45027271:1 ge		5.54291	5.70865	5.93296	5.26057	5.8884	5.6384	5.90304	6.35659	5.86986	5.86863	5.55801	5.76744	5.71935	5.69225	5.41662	5.54178	5.25713	5.70937	5.94736	5.6331	6.42645	5.62307	5.88606	6.25656	6.16236	5.86318	5.82454	6.05572	5.50446	6.02783	5.49103	5.52839	5.47766	5.5987	6.02589	5.89239	5.80694	5.6744	5.78946	5.78325	5.84448
chr4	22747131	22747233	17412229	---		---	ENSMUST00000158184 // ENSEMBL // ncrna:miRNA chromosome:NCBIM37:4:22674278:22674380:1 g		4.70684	4.77802	5.18878	5.07002	5.21649	5.10677	4.90953	4.38589	4.39579	4.68205	5.26763	5.108	5.51384	4.87175	4.06975	5.5198	5.1686	4.9258	4.58023	5.48882	5.38355	5.58265	4.89911	5.05853	5.16756	5.1725	5.46747	4.71893	5.13025	4.74914	4.69834	5.49191	5.33533	4.79888	5.05872	4.91422	5.44863	5.0729	4.86929	5.11726	4.73561
chr4	24496451	24602950	17412237	NM_199467 // Mms22l // MMS22-like, DNA repair protein // 4 A3|4 // 212377 /// ENSMUST00	Mms22l	NM_199467	NM_199467 // RefSeq // Mus musculus MMS22-like, DNA repair protein (Mms22l), mRNA. // c		9.00419	9.34285	9.5789	9.78759	9.38768	9.25702	9.59422	8.03614	9.27186	9.69072	9.57211	9.44967	9.79072	9.51794	9.48294	9.75298	9.63692	9.68982	9.68067	9.57262	9.72522	9.53263	9.01386	9.6343	9.48759	9.58131	10.0407	9.23149	9.50949	9.19518	10.0097	9.5979	9.59479	9.51122	9.37876	9.83461	9.97247	9.79655	9.61605	9.74258	9.45518
chr4	41092722	41098183	17424119	NM_016689 // Aqp3 // aquaporin 3 // 4 B1|4 // 11828 /// ENSMUST00000055327 // Aqp3 // a	Aqp3	NM_016689	NM_016689 // RefSeq // Mus musculus aquaporin 3 (Aqp3), mRNA. // chr4 // 100 // 100 //		5.19283	6.58427	4.61049	5.07497	4.67697	4.68196	5.18084	5.00042	5.20304	4.87439	4.87222	4.67027	4.70983	4.75741	4.92577	4.83681	4.92149	4.59435	4.92612	4.67362	4.80394	4.9271	6.88867	4.69128	4.74696	4.56411	4.71258	4.98387	4.55481	5.03815	4.56109	4.82055	4.85757	7.85935	4.98534	4.69373	4.76979	4.58879	4.76726	4.818	4.86859
chr4	45395923	45408766	17424945	NM_001009949 // Mcart1 // mitochondrial carrier triple repeat 1 // 4 B1|4 // 230125 ///	Mcart1	NM_001009949	NM_001009949 // RefSeq // Mus musculus mitochondrial carrier triple repeat 1 (Mcart1),		9.03021	9.21119	9.15635	8.90971	9.16049	8.99854	9.20867	8.42734	8.93638	9.11983	9.16376	9.15999	9.21347	8.75392	8.49208	9.17138	9.15234	9.02394	9.03618	9.14976	8.84354	9.2011	9.15608	8.62226	9.3534	9.30204	9.38	9.25247	9.09811	8.90961	9.15684	9.12526	9.01878	8.81494	8.72225	8.98254	8.96512	9.08873	9.20582	9.27054	9.3337
chr4	34803110	34882960	17423901	NM_013889 // Zfp292 // zinc finger protein 292 // 4 A5|4 17.2 cM // 30046 /// ENSMUST00	Zfp292	NM_013889	NM_013889 // RefSeq // Mus musculus zinc finger protein 292 (Zfp292), mRNA. // chr4 //		9.72281	10.0235	10.4287	9.99304	10.1716	10.1677	10.1409	9.3951	9.71727	10.0049	10.2284	10.0977	10.4413	10.1925	9.78351	9.99295	10.3753	10.3859	10.365	10.1657	9.78935	10.1008	9.73222	9.7005	9.94925	9.90482	10.417	9.74161	10.0386	9.87743	10.5817	9.91848	10.6976	10.1655	10.2093	10.4807	10.2582	10.3623	10.2456	10.2861	10.5147
chr4	15022582	15031987	17411955	---		---	ENSMUST00000129207 // ENSEMBL // cdna:known chromosome:NCBIM37:4:14949729:14959134:1 ge		3.28991	3.39938	3.32668	3.36364	3.31338	3.36871	3.48926	3.22396	3.11594	3.2901	3.76606	2.95026	3.63986	3.33858	3.27726	3.36469	3.63974	3.23377	3.36425	3.28201	3.36513	3.63868	3.53041	3.2478	3.34834	3.45762	3.19267	3.08629	3.24659	3.29022	3.46507	3.26929	3.40034	3.36814	3.36804	3.31264	3.35451	3.42964	3.675	3.47736	3.15378
chr4	41465151	41480926	17412871	NM_025539 // Nudt2 // nudix (nucleoside diphosphate linked moiety X)-type motif 2 // 4	Nudt2	NM_025539	NM_025539 // RefSeq // Mus musculus nudix (nucleoside diphosphate linked moiety X)-type		7.71355	7.50718	7.72084	7.40072	7.35828	7.26392	7.30415	7.38421	7.67262	7.46469	7.80064	7.72326	7.4221	7.50831	7.60122	7.5488	7.49534	7.28613	7.40531	7.27912	7.32542	7.83074	7.12058	7.85352	7.46953	7.69033	7.93267	7.50382	7.66514	7.42052	7.68482	7.18132	7.94269	7.14372	7.24943	7.72583	7.51873	7.85089	8.26301	7.5487	7.38481
chr4	18860454	19122526	17423511	---		---	ENSMUST00000137780 // ENSEMBL // cdna:putative chromosome:NCBIM37:4:18787601:19049673:-		3.36766	3.27386	3.35562	4.1689	3.56824	3.50014	3.42724	3.37282	3.41291	3.55483	3.30753	3.37569	3.30417	3.1921	4.08955	3.51623	3.46231	3.36743	3.32606	3.42339	3.23625	3.30495	3.26515	3.25324	3.35318	3.46392	3.47027	3.36275	3.48461	3.47071	3.184	3.49905	3.22591	3.29588	3.15895	3.44939	3.23296	3.41931	3.58007	3.46263	3.43118
chr4	24966407	25271099	17412282	NM_030733 // Gpr63 // G protein-coupled receptor 63 // 4 A3|4 // 81006 /// ENSMUST00000	Gpr63	NM_030733	NM_030733 // RefSeq // Mus musculus G protein-coupled receptor 63 (Gpr63), mRNA. // chr		6.13422	6.40074	6.17054	6.35974	6.23652	6.34883	6.44761	5.82313	5.85063	6.1887	6.23038	6.31011	6.63129	6.12628	6.47545	6.41251	6.28132	6.16537	6.64872	6.11914	6.14278	6.62402	6.03817	6.19066	5.80089	5.78041	6.60416	6.4313	6.28453	6.06903	6.33377	6.28679	6.53358	6.11933	6.39723	6.59383	6.74291	6.49772	6.25652	6.15368	6.53696
chr4	41211502	41211582	17424201	---		---	ENSMUST00000158683 // ENSEMBL // ncrna:snoRNA chromosome:NCBIM37:4:41158535:41158615:-1		6.50435	6.50266	7.24689	5.81283	7.05373	6.33606	6.78325	5.98497	6.99088	6.78297	6.90455	6.74056	7.00616	7.01098	6.14183	5.50351	6.98618	6.64785	6.9878	6.63132	7.11419	7.1147	6.22229	6.85699	7.18722	7.47684	7.39448	6.65865	7.1491	6.99201	7.03158	6.64895	7.23315	6.70547	6.34982	7.2642	7.16184	6.62365	7.33195	7.07675	6.56135
chr4	48430858	48473459	17425181	NM_172304 // Tex10 // testis expressed gene 10 // 4 B1|4 // 269536 /// ENSMUST000001648	Tex10	NM_172304	NM_172304 // RefSeq // Mus musculus testis expressed gene 10 (Tex10), mRNA. // chr4 //		8.46154	8.82129	8.87051	8.64056	8.90311	8.7266	8.93681	8.6611	9.2287	8.91833	8.88668	8.55074	9.14168	8.65614	8.84317	8.62883	8.79445	8.67248	8.80903	9.05285	9.36961	9.12965	8.85624	9.17074	8.79785	9.12288	9.15976	8.75816	9.08233	9.18853	9.09192	9.05322	9.10541	8.79687	8.67067	9.27009	8.88341	8.96348	8.99203	8.89562	8.72161
chr4	11979560	11981265	17423333	---		---	ENSMUST00000098260 // ENSEMBL // cdna:known chromosome:NCBIM37:4:11906707:11908412:-1 g		4.13633	4.20266	4.15583	4.28854	4.06934	4.59663	4.00008	3.8527	4.18255	3.84814	4.89958	4.0201	4.33622	3.82873	4.02499	4.05837	4.37911	3.81789	4.08217	4.08498	4.02867	4.73118	3.94512	4.04193	3.84319	4.02863	4.66175	4.01822	3.98513	3.96682	4.53578	4.09901	4.34997	4.16948	4.04652	4.42825	4.09757	4.1245	4.21433	3.96447	3.94966
chr4	46038935	46116032	17413770	ENSMUST00000107773 // Tmod1 // tropomodulin 1 // 4 B1|4 21.5 cM // 21916 /// NM_021883	Tmod1	ENSMUST00000107773	ENSMUST00000107773 // ENSEMBL // cdna:known chromosome:NCBIM37:4:46051807:46128904:1 ge		7.347	7.66375	6.18884	5.6941	6.88952	6.51178	7.33255	6.49073	6.18368	8.50626	6.97062	6.91416	6.17074	6.03572	6.92044	6.79783	6.08056	6.62477	6.7194	7.4753	5.91837	6.52871	7.6214	5.85748	6.59429	7.85605	6.07976	7.6224	7.81559	7.00468	6.02322	7.05807	5.83125	6.1884	6.23866	5.78863	6.39247	6.26858	9.4733	7.88875	6.24163
chr4	21677480	21685963	17423612	NM_001080771 // Prdm13 // PR domain containing 13 // 4 A3|4 // 230025 /// ENSMUST000000	Prdm13	NM_001080771	NM_001080771 // RefSeq // Mus musculus PR domain containing 13 (Prdm13), mRNA. // chr4		5.45155	5.40199	5.53572	5.30299	5.61832	5.72742	5.79985	5.65032	5.27817	5.86337	5.47396	5.51867	5.23018	5.39878	5.67437	5.75276	5.51222	5.32363	5.62721	5.45741	5.56871	5.4819	5.70036	5.48168	5.367	5.4556	5.33158	5.32562	5.42712	5.13525	5.70803	5.25109	5.06124	5.54051	5.55449	5.38593	5.55724	5.78524	5.44461	5.76876	5.45381
chr4	45683589	45723706	17413666	NM_001033412 // Gm829 // predicted gene 829 // 4 B1|4 // 329839	Gm829	NM_001033412	NM_001033412 // RefSeq // Mus musculus predicted gene 829 (Gm829), mRNA. // chr4 // 95		4.21971	4.10175	4.14771	4.06712	4.50648	4.22515	4.13608	4.05757	4.24338	4.21078	4.61266	4.13446	4.63426	4.06429	4.44839	4.0518	4.27616	4.2942	4.28099	4.26553	4.28468	3.96229	4.20645	4.21565	4.28266	3.92739	4.28697	4.18826	4.23659	3.90628	4.02781	4.18727	4.08722	4.22286	4.48478	4.16915	4.23936	4.1192	4.04745	4.24932	4.29213
chr4	23626656	23626745	17423638	---		---	ENSMUST00000158698 // ENSEMBL // ncrna:miRNA chromosome:NCBIM37:4:23553803:23553892:-1		4.76834	4.35224	4.60582	4.47165	4.56157	4.59061	4.81619	4.86689	4.76897	4.35071	4.37434	4.70794	4.48977	4.75343	4.76083	4.17807	4.51762	4.55828	4.41847	4.28614	4.55936	4.18855	4.42856	4.73755	4.40838	4.45132	4.86763	4.42425	4.46135	4.94342	4.64479	4.98229	4.4146	4.62354	4.34532	4.34044	4.76892	4.42016	4.31549	4.13562	4.43825
chr4	51216678	51229928	17414099	NM_001162865 // Cylc2 // cylicin, basic protein of sperm head cytoskeleton 2 // 4|4 //	Cylc2	NM_001162865	NM_001162865 // RefSeq // Mus musculus cylicin, basic protein of sperm head cytoskeleto		3.18085	3.70552	3.34031	3.60603	3.41724	3.35846	3.44503	3.85026	3.41524	3.39618	3.23307	3.41638	3.28045	3.49114	3.63361	3.9877	3.4452	3.29367	3.58302	3.23242	3.37797	3.57634	3.37877	3.3723	3.78061	3.54311	3.21582	3.33519	3.62885	3.61919	3.32489	3.37294	3.31607	3.45285	3.23271	3.4842	3.21537	3.51994	3.33528	3.26136	3.3203
chr4	25541791	25542281	17548334	NM_019766 // Ptges3 // prostaglandin E synthase 3 (cytosolic) // 10 D3|10 // 56351 ///	Ptges3	NM_019766	NM_019766 // RefSeq // Mus musculus prostaglandin E synthase 3 (cytosolic) (Ptges3), mR		10.7188	10.5792	11.1	9.98325	10.9136	10.7353	11.1305	10.7143	10.8738	10.9758	10.8672	10.8922	10.9192	10.8959	10.3928	10.0154	11.1616	10.3329	10.8038	10.8549	10.902	10.7857	10.4219	10.6363	10.709	10.7839	11.1411	10.7535	10.9849	10.5353	10.7934	10.7004	11.1931	10.8917	10.9681	10.7809	10.8963	11.1406	11.3396	10.9196	10.7526
chr4	33245423	33290163	17423792	NM_001033225 // Pnrc1 // proline-rich nuclear receptor coactivator 1 // 4 A5|4 // 10876	Pnrc1	NM_001033225	NM_001033225 // RefSeq // Mus musculus proline-rich nuclear receptor coactivator 1 (Pnr		8.14643	7.90885	8.00695	8.0975	8.30848	8.0773	8.23398	8.09082	8.3201	7.98163	7.85169	7.97969	7.67218	7.75914	7.83497	8.25427	7.64937	7.82968	8.0722	8.24525	8.32368	8.116	8.1155	7.83928	8.08373	8.67388	7.97391	7.96539	7.60332	8.35056	7.70425	7.90356	8.16563	7.58645	7.69815	7.69907	7.66408	8.02488	7.33701	8.3592	7.97523
chr4	26324506	26346891	17423713	ENSMUST00000041374 // Manea // mannosidase, endo-alpha // 4 A3|4 // 242362 /// NM_17286	Manea	ENSMUST00000041374	ENSMUST00000041374 // ENSEMBL // cdna:known chromosome:NCBIM37:4:26251653:26274038:-1 g		8.95588	9.21812	9.17807	9.2382	9.0327	9.23275	9.48215	8.84598	8.96313	8.9829	8.82917	8.94596	9.34873	9.00498	8.32166	9.59708	9.29729	8.93275	9.00547	8.65391	8.85027	9.10783	9.01498	9.34392	8.87332	9.10428	9.57456	9.11099	9.15425	9.11791	9.14761	8.86183	9.11557	9.16028	8.74807	9.09311	9.25806	9.63636	9.09333	8.87023	9.21695
chr4	52855514	52858466	17425291	ENSMUST00000107670 // Olfr273 // olfactory receptor 273 // 4 B2-C2|4 // 258821 /// ENSM	Olfr273	ENSMUST00000107670	ENSMUST00000107670 // ENSEMBL // cdna:known chromosome:NCBIM37:4:52868430:52871338:-1 g		3.83745	3.74417	3.78672	4.2604	3.7202	3.69541	3.53577	3.94169	3.5035	3.87661	4.09255	3.85094	3.58255	3.65744	3.63842	3.88905	3.65842	3.69866	3.78048	3.82939	4.00677	3.68234	4.09239	3.71564	3.77166	3.79228	3.94874	3.61939	3.89142	3.61314	3.9525	3.80537	3.85419	3.78519	3.84138	3.925	3.82361	3.82948	3.75902	3.77976	3.71756
chr4	21879673	21912162	17412191	NM_172687 // Coq3 // coenzyme Q3 homolog, methyltransferase (yeast) // 4 A3|4 16.6 cM /	Coq3	NM_172687	NM_172687 // RefSeq // Mus musculus coenzyme Q3 homolog, methyltransferase (yeast) (Coq		9.11859	9.12467	9.26114	8.75101	9.0729	8.6445	9.31358	8.5036	8.63491	9.22919	8.5587	9.38628	8.58799	9.05178	8.66601	9.17139	9.05821	8.73057	8.79227	8.97607	8.75367	9.16408	9.07322	8.72243	9.61435	9.19473	9.08135	9.17228	9.64582	8.69016	9.07803	9.03366	8.8444	8.95913	9.27986	9.26038	8.95667	8.86998	9.82944	9.45744	9.04819
chr4	48045153	48086447	17413945	ENSMUST00000030025 // Nr4a3 // nuclear receptor subfamily 4, group A, member 3 // 4|4 B	Nr4a3	ENSMUST00000030025	ENSMUST00000030025 // ENSEMBL // cdna:known chromosome:NCBIM37:4:48058025:48099317:1 ge		6.86894	7.02497	5.70431	6.02909	6.91887	6.27802	6.75383	9.72899	8.22492	7.12864	5.66231	6.22768	6.59636	6.3551	7.29754	5.99285	5.95601	6.76252	6.98899	7.04571	7.45641	6.29859	8.76408	6.98852	7.04602	8.90514	5.85077	7.49129	6.54389	7.58803	5.88175	6.53927	6.27473	6.78746	6.26782	5.67034	6.17771	6.53249	6.77878	8.28635	6.57031
chr4	44755877	44932215	17413553	NM_138590 // Zcchc7 // zinc finger, CCHC domain containing 7 // 4 B1|4 21.5 cM // 31988	Zcchc7	NM_138590	NM_138590 // RefSeq // Mus musculus zinc finger, CCHC domain containing 7 (Zcchc7), mRN		8.59566	8.56934	8.86698	8.36519	8.68554	8.35624	8.79328	9.20036	9.22266	8.92809	8.30295	8.3237	8.61946	8.75895	9.01781	8.97784	8.78021	8.94774	8.658	8.62877	9.38102	8.57161	8.99576	9.17447	9.01228	8.81626	8.68975	9.09694	8.85637	9.31897	8.86228	8.41484	8.6109	8.60337	8.73825	8.86273	9.03242	8.64991	8.80903	8.81047	8.68218
chr4	53011880	53022060	17414173	ENSMUST00000015391 // Nipsnap3b // nipsnap homolog 3B (C. elegans) // 4|4 B3 // 66536 /	Nipsnap3b	ENSMUST00000015391	ENSMUST00000015391 // ENSEMBL // cdna:known chromosome:NCBIM37:4:53024752:53034932:1 ge		8.03589	7.69177	7.81577	8.06931	7.6396	7.63551	7.88858	8.12254	8.31208	7.54792	7.73787	8.47214	7.45434	7.73756	7.65622	8.29848	8.14423	7.96317	7.62017	7.67142	8.23172	7.78961	7.51609	8.60894	7.64924	7.95108	7.56227	7.63634	7.74969	7.97289	7.85782	7.40026	8.12519	7.73796	7.51685	7.79347	7.64604	7.79429	8.20032	7.88851	7.6827
chr4	21846327	21848448	17423629	NM_025669 // Sfrs18 // serine/arginine-rich splicing factor 18 // 4 A3|4 // 66625 /// E	Sfrs18	NM_025669	NM_025669 // RefSeq // Mus musculus serine/arginine-rich splicing factor 18 (Sfrs18), m		4.48982	4.42667	4.62637	4.78988	4.3983	4.63324	4.53297	4.43303	4.28481	4.68665	4.6831	4.3852	4.19231	4.5125	4.90314	4.4019	4.45483	4.45761	4.63948	4.49091	4.58161	4.63545	4.54612	4.38714	3.95914	4.32679	4.68011	4.456	4.60017	4.06015	4.516	4.36531	4.66404	4.37471	4.5321	4.09448	4.62731	4.46798	4.42355	4.5217	4.51485
chr4	44126210	44233789	17424850	NM_175201 // Rnf38 // ring finger protein 38 // 4 B1|4 // 73469 /// ENSMUST00000098098	Rnf38	NM_175201	NM_175201 // RefSeq // Mus musculus ring finger protein 38 (Rnf38), transcript variant		10.1359	9.72436	9.57696	9.67975	9.51801	9.52993	9.61931	9.27165	9.55687	9.30351	9.53236	9.42891	9.35444	9.89712	9.53451	9.89105	9.47798	9.9801	9.19526	9.47145	9.63364	9.47224	9.38049	9.46303	10.0206	9.47857	9.52584	9.47364	9.46621	9.4684	9.68318	9.70275	9.70214	9.77171	9.76012	9.53168	9.52022	9.8045	9.47113	9.60129	9.93009
chr4	6396207	6454271	17423066	NM_010945 // Nsmaf // neutral sphingomyelinase (N-SMase) activation associated factor /	Nsmaf	NM_010945	NM_010945 // RefSeq // Mus musculus neutral sphingomyelinase (N-SMase) activation assoc		9.45474	9.79657	9.9803	9.63326	9.39141	9.54027	9.89236	8.79833	9.2314	9.66425	9.93191	9.52713	10.4243	9.92601	9.86471	10.0706	9.79963	9.97702	9.54047	9.52688	9.53287	9.72165	9.48962	9.69693	9.67114	9.58517	9.79489	9.9156	9.39648	9.39469	9.77383	10.0373	10.0937	9.76289	9.98333	10.0103	10.0134	10.2108	9.79474	9.72826	9.80337
chr4	42979963	43000507	17424493	NM_009503 // Vcp // valosin containing protein // 4 A5|4 23.0 cM // 269523 /// ENSMUST0	Vcp	NM_009503	NM_009503 // RefSeq // Mus musculus valosin containing protein (Vcp), mRNA. // chr4 //		10.2753	10.3407	10.1466	9.90027	9.97978	10.3795	10.2656	10.4148	10.4421	10.1433	10.3411	9.80825	10.1576	10.2652	10.0711	10.3856	10.2241	9.93036	10.0658	10.3443	10.4477	10.1459	10.1419	10.3789	10.4726	10.1558	10.1584	10.0257	10.3836	10.3776	10.2836	10.0958	10.3418	10.267	10.28	10.4474	10.2297	10.3014	10.3609	10.1348	10.5653
chr4	12271399	12314583	17411901	---		---	ENSMUST00000155156 // ENSEMBL // havana:lincRNA chromosome:NCBIM37:4:12198546:12241730:		4.54802	4.03039	4.37364	5.0031	4.83323	4.74728	4.27839	4.7628	4.16856	3.89296	4.46654	4.47386	4.44951	4.60332	4.60447	4.52517	4.54679	4.45136	4.15593	4.01549	4.28056	4.46183	4.2681	4.34471	4.31634	4.2776	4.44315	4.44318	4.53904	4.25249	4.25471	4.18245	4.45729	4.09792	4.50131	4.83201	4.6932	4.59676	4.6785	4.60979	4.38719
chr4	25609332	25800244	17423701	ENSMUST00000084770 // Fut9 // fucosyltransferase 9 // 4 A3|4 8.8 cM // 14348 /// NM_010	Fut9	ENSMUST00000084770	ENSMUST00000084770 // ENSEMBL // cdna:known chromosome:NCBIM37:4:25536479:25727293:-1 g		6.6938	5.8831	5.46245	6.77481	7.07649	7.45447	7.93644	9.36765	7.67365	7.59513	6.01807	4.90823	7.74771	5.98328	7.00529	6.35411	6.58556	5.74846	7.52982	7.87752	7.89418	8.43471	6.42003	8.69708	5.58192	8.09373	6.72946	8.10393	7.6122	7.56751	6.76649	5.94554	6.24022	6.79879	6.08256	5.81093	8.24258	7.70392	7.94838	7.63492	5.68535
chr4	24792680	24800310	17412269	NM_001163020 // Klhl32 // kelch-like 32 (Drosophila) // 4 A3|4 7.9 cM // 212390 /// NM_	Klhl32	NM_001163020	NM_001163020 // RefSeq // Mus musculus kelch-like 32 (Drosophila) (Klhl32), transcript		5.43471	5.69429	5.66022	5.39146	5.66946	5.58188	5.54789	5.81792	5.54947	5.5132	5.5486	5.63148	5.75714	5.42871	5.79508	5.51615	5.7753	5.66855	5.65079	5.51413	5.38496	5.50823	5.72475	5.56851	5.57877	5.48335	5.63666	5.39881	5.52847	5.72464	5.6398	5.28803	5.34609	5.6	5.55085	5.72976	6.12352	5.63327	5.43826	5.50894	5.66107
chr4	25861239	25861348	17423711	---		---	ENSMUST00000103789 // ENSEMBL // ncrna:miRNA chromosome:NCBIM37:4:25788386:25788495:-1		5.15514	4.99049	5.13097	6.03661	5.17581	5.04705	4.83657	5.00604	5.02433	5.07841	5.45954	5.20174	5.14612	4.89616	5.30193	5.19152	5.03045	4.80036	5.15306	5.05916	5.23449	5.1608	4.98706	4.88467	5.31187	4.97272	5.42079	4.66871	4.797	4.30917	4.92319	5.01658	5.60568	4.99713	5.63827	4.48672	5.41862	5.1607	4.82853	5.24962	5.25012
chr4	24960790	24967449	17423658	---		---	---		5.59216	5.74319	5.74273	5.77315	5.77559	6.08653	5.94018	5.82031	5.43062	5.97006	5.9619	5.95768	5.92586	5.78562	5.98292	6.01771	6.01947	5.81886	5.82649	5.87438	5.65035	5.66098	5.8406	5.67557	5.77627	5.82343	5.87896	5.75061	5.79182	5.80439	5.8313	5.87228	6.0265	5.84035	5.97272	5.88486	5.8658	6.13179	5.8419	5.98356	5.79099
chr4	48343587	48344214	17414007	NM_133834 // Hnrnpf // heterogeneous nuclear ribonucleoprotein F // 6 F1|6 // 98758 ///	Hnrnpf	NM_133834	NM_133834 // RefSeq // Mus musculus heterogeneous nuclear ribonucleoprotein F (Hnrnpf),		5.14192	5.13216	5.45525	5.45684	5.37956	6.77621	5.44168	6.14109	6.07095	5.4897	6.91955	5.1818	7.46486	5.82551	4.87696	5.48122	5.51326	5.33588	5.65618	5.48978	5.92723	6.06219	5.32877	5.8378	5.70069	5.86277	5.93844	5.44295	5.63337	6.35396	5.54201	5.73507	6.40585	5.63247	5.31266	5.8137	5.58736	5.36404	5.86663	5.17976	5.50878
chr4	10487956	10489362	17423205	---		---	ENSMUST00000139423 // ENSEMBL // havana:lincRNA chromosome:NCBIM37:4:10415103:10416509:		9.13031	9.77156	9.87742	10.5079	10.1463	9.5714	8.81187	8.08698	8.62794	10.1676	9.82352	9.68911	10.4043	9.44153	10.1879	9.34369	9.45702	9.61028	9.49257	9.4056	7.82621	9.03895	10.15	8.45628	8.7242	9.16258	9.77565	10.1128	10.1361	8.66158	8.4757	9.9452	8.87885	8.98596	8.48653	8.76424	8.92264	8.97329	10.5702	9.36826	8.95159
chr4	41639378	41641416	17412907	---		---	AK044733 // GenBank HTC // Mus musculus adult retina cDNA, RIKEN full-length enriched l		6.29058	6.42878	6.2177	6.72315	6.5595	6.36037	6.3352	6.92485	6.31996	6.25099	6.66066	6.35922	6.88437	6.40609	5.99491	6.57238	6.5911	6.18417	6.52581	6.23314	6.35525	6.40828	6.59789	6.07229	6.45187	6.37956	6.4946	6.65276	6.33331	6.19573	7.07222	6.44812	6.47455	6.76214	6.72787	6.6259	6.43255	6.28638	6.21333	6.27323	5.97572
chr4	52910833	52919172	17425296	NM_146839 // Olfr272 // olfactory receptor 272 // 4 B2-C2|4 // 258836 /// ENSMUST000000	Olfr272	NM_146839	NM_146839 // RefSeq // Mus musculus olfactory receptor 272 (Olfr272), mRNA. // chr4 //		3.06332	3.29387	3.03113	3.33391	3.09515	3.17064	3.56891	3.25547	3.06715	3.44596	3.24315	3.25314	3.27291	3.60582	3.08717	3.36808	3.35433	3.26091	3.13082	3.28236	3.26859	3.0618	3.23568	3.39869	3.29232	3.21912	3.09695	3.14652	3.202	3.2572	3.20101	3.56693	3.20551	3.18506	3.15063	3.44018	3.29171	3.14851	3.22314	3.24112	3.13215
chr4	34086126	34086233	17412638	---		---	ENSMUST00000157216 // ENSEMBL // ncrna:snRNA chromosome:NCBIM37:4:34173101:34173208:1 g		3.3097	3.33101	3.71062	4.50311	3.52596	3.26745	3.65027	4.02378	4.3591	3.47757	3.32625	3.6193	2.87868	3.49215	3.25143	4.34365	3.75514	3.41784	3.21614	2.84998	2.97167	3.76218	3.28561	3.89245	3.62684	3.9378	3.60469	4.05334	3.37954	3.95922	3.48557	4.06134	3.68575	3.40368	3.40926	3.40055	3.4431	3.86946	3.67773	3.3018	3.59877
chr4	46495155	46495285	17413845	---		---	ENSMUST00000082476 // ENSEMBL // ncrna:snoRNA chromosome:NCBIM37:4:46508027:46508157:1		3.36995	3.3511	3.10986	4.14372	3.53679	3.52011	3.13004	3.32749	3.98157	3.2728	3.1694	3.0803	3.31299	3.29169	4.06469	3.30124	3.18764	3.44576	2.95227	3.05477	3.75122	3.526	2.98515	3.74376	3.18229	3.50626	4.18074	3.24056	3.31415	3.79826	3.29416	3.15492	3.27324	3.11226	2.86401	3.19863	2.85277	3.4086	3.34192	3.69213	3.14009
chr4	44221195	44221267	17424876	NR_039565 // Mir5106 // microRNA 5106 // 4|4 23.17 cM // 100628618	Mir5106	NR_039565	NR_039565 // RefSeq // Mus musculus microRNA 5106 (Mir5106), microRNA. // chr4 // 100 /		3.26537	3.13495	3.23185	4.1832	3.27897	3.52179	3.79943	3.52039	3.27651	3.45634	3.60581	3.40241	3.67343	3.34118	3.67978	3.94903	3.57966	3.87973	3.3443	3.53203	3.42032	3.43251	3.39356	3.55963	3.58353	3.38746	3.5099	3.45998	3.49999	3.41422	3.62616	3.2641	3.67287	3.58253	3.78707	3.34731	3.86457	3.4543	3.38914	3.67143	3.68039
chr4	46489286	46500784	17425038	NM_053179 // Nans // N-acetylneuraminic acid synthase (sialic acid synthase) // 4|4 B2	Nans	NM_053179	NM_053179 // RefSeq // Mus musculus N-acetylneuraminic acid synthase (sialic acid synth		5.72475	5.95756	5.74785	5.74675	5.87445	6.48416	5.69485	6.10744	5.98374	5.75944	6.479	5.9142	6.65321	5.78139	6.04993	5.90743	5.84547	6.01297	6.14181	5.94381	5.68731	5.9175	5.934	5.90471	5.80228	6.05624	5.75507	5.66371	5.91778	6.00415	5.78149	6.20538	6.30674	5.8124	5.75271	5.70513	5.71127	5.66928	5.74144	5.72557	5.53218
chr4	45423276	45532470	17424952	NM_001033306 // Shb // src homology 2 domain-containing transforming protein B // 4 B1|	Shb	NM_001033306	NM_001033306 // RefSeq // Mus musculus src homology 2 domain-containing transforming pr		5.84531	6.16145	5.76213	5.96382	6.34815	5.69224	6.23304	6.29332	6.63984	7.01466	5.71379	5.89618	5.90396	5.63999	6.23552	5.67587	5.73101	5.86516	6.211	6.32672	6.60574	5.69158	6.45928	6.60705	6.61065	6.36058	5.666	6.29367	6.66927	6.26338	5.59639	5.85763	5.89658	5.58932	5.83057	5.8479	5.71092	5.62962	6.56098	6.22471	5.39165
chr4	46138511	46172403	17413789	NM_001033201 // Ncbp1 // nuclear cap binding protein subunit 1 // 4 B1|4 21.5 cM // 433	Ncbp1	NM_001033201	NM_001033201 // RefSeq // Mus musculus nuclear cap binding protein subunit 1 (Ncbp1), m		10.72	10.5562	10.6622	10.7956	10.5695	10.816	10.8379	10.127	10.3983	10.9145	10.5806	10.6933	10.7062	10.8011	10.2672	10.8514	10.9711	10.6996	10.7578	10.8717	10.4369	10.7677	10.7747	10.5003	10.8792	10.7125	10.9007	10.7113	10.9551	10.3463	10.8573	10.3018	10.8124	10.7638	10.4898	10.9947	10.8992	10.6925	11.0935	10.7736	10.6823
chr4	35191282	35226123	17423923	BC076612 // 3110043O21Rik // RIKEN cDNA 3110043O21 gene // 4 A5|4 // 73205 /// ENSMUST0	3110043O21Rik	BC076612	BC076612 // GenBank // Mus musculus RIKEN cDNA 3110043O21 gene, mRNA (cDNA clone MGC:10		8.85624	8.96206	8.96272	9.12796	8.63769	9.2226	8.86316	8.08097	8.51663	8.2401	9.21847	8.81499	8.79913	9.13939	8.53494	9.61808	9.38002	8.55355	8.90248	8.54263	8.34651	9.16333	8.18066	8.25642	9.06164	8.25612	8.78233	8.54585	8.63905	8.36369	9.37615	9.16237	9.3716	9.10807	9.07543	9.32784	8.55222	9.58161	8.37425	7.98926	9.30018
chr4	52496831	52497306	17425287	---		---	ENSMUST00000114578 // ENSEMBL // cdna:known chromosome:NCBIM37:4:52509703:52510178:-1 g		8.21249	8.14014	8.56741	8.79824	8.25553	8.10077	8.65199	7.9824	8.32464	8.23195	8.26055	8.58637	8.0695	8.64846	8.4402	8.34027	8.62649	8.03482	8.29739	8.25317	8.33515	8.62371	8.1857	8.14591	8.85062	8.78978	8.12941	8.68442	8.73825	8.38825	8.39319	8.614	8.26708	8.60327	8.58696	8.72627	8.41204	8.51823	8.35657	8.65832	8.65279
chr4	33027139	33031323	17423778	NR_036602 // 4933421O10Rik // RIKEN cDNA 4933421O10 gene // 4 A5|4 14.61 cM // 10050416	4933421O10Rik	NR_036602	NR_036602 // RefSeq // Mus musculus RIKEN cDNA 4933421O10 gene (4933421O10Rik), non-cod		7.76749	8.39956	8.31633	8.03748	8.33957	7.75892	8.19065	8.67862	8.1381	7.94172	7.70684	7.69356	8.08856	8.01736	7.62555	8.27413	8.27187	7.71015	7.94521	7.86593	8.04445	7.86753	8.4096	7.78873	8.24731	7.96435	7.94826	8.26749	7.98217	8.83594	8.06926	8.3446	8.35503	8.00357	8.33411	7.97199	8.23372	8.03335	7.85331	8.20356	8.28047
chr4	41033074	41048139	17424105	NM_007473 // Aqp7 // aquaporin 7 // 4|4 B1 // 11832 /// ENSMUST00000030136 // Aqp7 // a	Aqp7	NM_007473	NM_007473 // RefSeq // Mus musculus aquaporin 7 (Aqp7), mRNA. // chr4 // 100 // 79 // 1		6.09235	5.6069	5.47123	6.1702	5.63639	5.79982	5.77592	5.53416	5.4193	5.45346	5.88933	5.44667	5.91703	5.61474	6.01293	5.54937	5.39265	5.62802	5.82815	5.77576	5.7461	5.60353	5.87295	5.83611	5.66714	5.54065	5.63882	5.64027	5.68349	6.4379	5.69893	5.83343	5.70506	5.51458	5.75008	5.50223	5.60861	5.59115	5.54518	5.96064	5.49827
chr4	45034247	45084604	17424913	NM_001024142 // Fbxo10 // F-box protein 10 // 4 B1|4 // 269529 /// ENSMUST00000052236 /	Fbxo10	NM_001024142	NM_001024142 // RefSeq // Mus musculus F-box protein 10 (Fbxo10), mRNA. // chr4 // 100		8.49813	7.58948	8.0487	7.9691	7.80394	7.82311	7.90112	7.68197	7.75557	7.59018	8.17977	7.68773	8.12788	7.73029	7.90406	8.02642	7.79126	8.34674	8.08766	7.82963	7.51024	8.20913	7.60428	7.91605	7.91496	8.28907	8.00756	7.47182	7.61244	7.75471	7.62851	7.70098	7.56654	7.79047	7.83878	7.71623	7.46333	7.99333	7.70524	8.19024	7.9676
chr4	31964097	32023467	17412350	NM_009316 // Map3k7 // mitogen-activated protein kinase kinase kinase 7 // 4 A5|4 // 26	Map3k7	NM_009316	NM_009316 // RefSeq // Mus musculus mitogen-activated protein kinase kinase kinase 7 (M		9.34664	9.61555	9.61314	9.4286	9.42819	9.62231	9.50964	8.93103	9.29816	9.56641	9.68869	9.28423	9.62556	9.50094	9.16085	9.43196	9.64272	9.22751	9.63724	9.4999	9.31029	9.52135	9.09855	9.45588	9.45635	9.26242	9.5442	9.28778	9.54733	9.20842	9.62624	9.49733	9.64759	9.56648	9.69935	9.6589	9.31588	9.49381	9.30544	9.33442	9.4908
chr4	18730217	18730548	17423509	---		---	ENSMUST00000157875 // ENSEMBL // ncrna:misc_RNA chromosome:NCBIM37:4:18657364:18657695:		3.601	3.61944	3.49705	3.00671	3.50625	3.43087	3.42648	3.62952	3.5571	3.54216	3.73864	3.39407	3.61024	3.17307	3.55481	3.57553	3.29607	3.56461	3.77402	3.386	3.61298	3.34915	3.43627	3.42753	3.4361	3.58789	3.51249	3.09309	3.39567	3.66179	3.39769	3.28332	3.63996	3.30162	3.33209	3.24615	3.37507	3.16674	3.44133	3.42955	3.2978
chr4	34311003	34311485	17548336	XM_911501 // LOC636187 // 60S ribosomal protein L21-like // 4|4 // 636187	LOC636187	XM_911501	XM_911501 // RefSeq // PREDICTED: Mus musculus 60S ribosomal protein L21-like (LOC63618		4.0201	3.80699	4.1193	5.17285	3.88901	3.71496	3.79767	3.52389	4.27192	4.36228	3.81665	3.78193	3.96782	3.79195	4.34742	4.25757	3.9485	3.63886	3.83893	3.61816	3.67186	3.69137	3.70827	3.70918	3.67636	4.38383	4.02923	3.85247	4.03714	3.96381	3.86785	3.81608	3.72207	4.02045	3.92837	4.54469	3.78037	4.18998	3.82524	3.62846	3.70817
chr4	40920052	40931395	17412793	NM_011463 // Spink4 // serine peptidase inhibitor, Kazal type 4 // 4|4 A // 20731 /// E	Spink4	NM_011463	NM_011463 // RefSeq // Mus musculus serine peptidase inhibitor, Kazal type 4 (Spink4),		4.48032	4.66705	4.38009	4.98366	4.41246	4.62956	4.45344	4.65892	4.63617	4.24182	4.35817	4.40892	4.60907	4.62727	4.81662	4.17993	4.37959	4.37638	4.31288	4.3139	4.62235	4.52274	4.52556	4.39988	4.27033	4.69694	4.24652	4.19963	4.21664	4.06329	4.48128	4.51425	4.07428	4.14764	4.86874	4.11762	4.79606	4.50493	4.45035	4.56214	4.26533
chr4	33309159	33309251	17423802	---		---	ENSMUST00000174975 // ENSEMBL // ncrna:miRNA chromosome:NCBIM37:4:33396134:33396226:-1		8.18834	7.83116	8.4037	8.5849	8.64126	8.08924	8.31083	9.45227	8.23654	8.13709	7.75545	8.1109	7.99369	8.39944	8.21289	8.67495	8.63471	8.3085	8.27047	7.68391	8.48392	7.64066	8.77026	8.84374	8.40408	8.02231	7.75933	8.96803	7.71196	8.43801	7.91786	8.5099	7.96191	7.86121	8.49381	7.46941	8.24523	7.95631	7.35224	8.61737	7.92096
chr4	34024874	34050191	17423806	ENSMUST00000029927 // Spaca1 // sperm acrosome associated 1 // 4 A5|4 // 67652 /// NM_0	Spaca1	ENSMUST00000029927	ENSMUST00000029927 // ENSEMBL // cdna:known chromosome:NCBIM37:4:34115289:34137166:-1 g		6.05633	4.10382	4.2023	4.21897	4.26304	4.02166	4.07722	3.95456	4.16832	4.43296	4.0489	4.1562	3.92991	4.0561	4.13228	4.0579	4.09193	4.01781	4.1909	4.0818	3.87372	3.99916	3.95769	3.96251	3.76318	3.95572	3.91964	3.81028	4.4712	3.86592	3.90975	4.21977	4.41891	4.0587	4.63535	4.06421	4.06966	4.38043	4.02988	4.03488	4.27397
chr4	41642185	41643077	17412910	---		---	ENSMUST00000141120 // ENSEMBL // cdna:putative chromosome:NCBIM37:4:41589218:41590110:1		5.08219	5.34899	4.77106	4.73378	4.97734	5.08407	5.18929	5.35877	4.62914	5.13537	4.89129	4.95557	5.03235	4.96973	4.65498	4.87477	4.92853	5.06139	4.98134	5.16177	5.04201	5.10991	4.95171	4.73417	5.48657	4.78809	5.1196	5.49577	5.03463	5.0456	5.74614	5.23	4.94454	5.93252	5.368	5.15664	5.0741	4.88096	5.32951	4.96152	4.50982
chr4	45342101	45379759	17413649	ENSMUST00000155551 // Dcaf10 // DDB1 and CUL4 associated factor 10 // 4 B1|4 // 242418	Dcaf10	ENSMUST00000155551	ENSMUST00000155551 // ENSEMBL // cdna:known chromosome:NCBIM37:4:45354973:45392631:1 ge		9.11396	9.34099	9.1126	9.35595	9.17575	9.30296	9.08956	9.24523	8.98664	9.3618	9.17374	9.10535	9.49516	9.27924	8.61709	9.33529	9.28059	9.06848	9.38927	9.13626	9.22724	9.4316	9.28269	9.11615	9.26828	9.31521	9.21109	9.11917	9.18918	8.98342	9.18522	9.14213	9.30315	9.15172	9.13783	9.16997	9.23796	9.31249	9.46005	9.41896	9.41784
chr4	43492785	43493059	17424631	NR_001460 // Rmrp // RNA component of mitochondrial RNAase P // 4 B1|4 // 19782 /// ENS	Rmrp	NR_001460	NR_001460 // RefSeq // Mus musculus RNA component of mitochondrial RNAase P (Rmrp), RNa		11.2943	10.9248	10.7727	11.4779	11.3183	11.4243	10.7551	10.3549	10.6712	10.7874	11.327	10.6811	11.6276	10.8328	11.5541	11.0803	10.8582	11.211	11.1886	10.844	10.5764	11.1454	10.4783	10.7811	10.682	10.8497	11.0661	10.8183	10.7278	10.7045	10.9017	10.4331	11.4081	10.7495	10.7933	10.7843	10.869	11.2126	11.321	11.0513	10.4714
chr4	41345848	41345951	17424217	---		---	ENSMUST00000157903 // ENSEMBL // ncrna:snRNA chromosome:NCBIM37:4:41292881:41292984:-1		4.34603	5.7816	5.45639	3.43738	4.15709	5.0436	4.80096	4.12768	4.37917	4.35322	4.73934	4.92157	4.39506	5.21671	3.77532	4.19546	5.10942	5.83362	4.27791	3.61797	3.88287	3.60318	4.61823	4.53881	6.09465	5.60437	5.53468	5.55501	4.33879	4.54829	4.02206	5.80862	5.14994	4.32177	5.21811	4.48466	5.74296	5.31433	5.41635	5.28783	6.61318
chr4	19575066	19651130	17412067	NM_025476 // Fam82b // family with sequence similarity 82, member B // 4 A3|4 // 66302	Fam82b	NM_025476	NM_025476 // RefSeq // Mus musculus family with sequence similarity 82, member B (Fam82		6.72652	6.44558	6.91448	6.48509	6.59541	6.45105	6.5726	7.23949	7.4195	6.83717	6.64556	6.6844	6.49632	6.90761	6.43176	6.5565	6.97372	6.7096	6.61046	6.72752	6.6432	6.82007	6.67228	7.04998	7.11952	7.03601	7.13896	7.12832	6.93103	7.03131	6.87944	6.66997	6.5038	7.01122	6.70017	7.17144	6.96805	6.67212	7.03669	6.80948	7.17508
chr4	8646964	8647547	17548332	XR_140622 // Gm8273 // predicted gene 8273 // 4 A1|4 // 666752	Gm8273	XR_140622	AK084737 // GenBank HTC // Mus musculus 13 days embryo heart cDNA, RIKEN full-length en		7.13192	7.32406	7.43292	8.03359	7.11809	7.31066	7.43545	7.25138	7.13939	7.06759	7.57352	7.5068	7.43411	7.50884	7.56491	7.40936	7.55188	6.88207	7.24274	7.04003	6.77998	7.4677	7.12851	6.90485	7.16419	6.92644	7.47979	7.04908	6.93258	7.09136	7.60877	7.21726	7.68503	7.39107	6.95695	7.63047	7.52993	7.43099	7.39587	7.10077	7.52545
chr4	12812706	12812812	17411905	---		---	ENSMUST00000083889 // ENSEMBL // ncrna:rRNA chromosome:NCBIM37:4:12739853:12739959:1 ge		4.33489	4.82909	4.38482	5.8314	4.09777	4.47017	4.35382	3.96318	4.089	4.56235	4.56661	4.22955	4.377	4.05325	3.80846	4.81326	4.35322	4.55433	4.10803	4.2672	4.31823	4.57584	4.42133	4.18187	4.30803	4.36383	4.15792	4.07237	4.74782	4.59691	5.05692	4.3756	4.68001	4.28629	4.50325	4.12302	5.19671	4.8311	3.83471	4.48503	4.397
chr4	46300007	46345515	17425010	ENSMUST00000095097 // Foxe1 // forkhead box E1 // 4 B1|4 21.5 cM // 110805	Foxe1	ENSMUST00000095097	ENSMUST00000095097 // ENSEMBL // cdna:known chromosome:NCBIM37:4:46356481:46359284:1 ge		5.6029	5.78477	5.96087	5.92803	5.94666	5.91013	5.90915	5.82671	5.4335	5.37334	5.37867	5.76323	5.83388	5.87657	5.82881	5.52216	5.73842	6.07722	5.95816	5.78869	5.50238	5.5429	5.58077	5.40886	5.76156	5.65509	5.93749	5.46677	5.78478	5.40086	5.50246	5.84071	5.57364	5.98573	5.7817	5.48601	6.12413	5.82184	5.53595	5.87233	5.45269
chr4	34743784	34756263	17423885	BC147519 // Gm136 // predicted gene 136 // 4 A5|4 // 214568 /// BC147522 // Gm136 // pr	Gm136	BC147519	BC147519 // GenBank // Mus musculus gene model 136, (NCBI), mRNA (cDNA clone MGC:182617		3.20065	3.58876	3.36318	3.4786	3.08228	3.69475	3.24894	3.37471	3.3115	3.50936	3.66345	3.64702	3.37749	3.59189	3.78796	3.24048	3.60238	3.45507	3.2197	3.4444	3.49184	3.39771	3.39287	3.19376	3.19285	3.44317	3.36607	3.26878	3.36929	3.64383	3.56751	3.60628	3.2258	3.23816	3.43131	3.55119	3.52208	3.72883	3.25558	3.27364	3.92419
chr4	43427019	43429134	17424596	NM_177377 // Fam166b // family with sequence similarity 166, member B // 4 A5|4 // 3298	Fam166b	NM_177377	NM_177377 // RefSeq // Mus musculus family with sequence similarity 166, member B (Fam1		4.71681	4.99316	5.09875	4.88281	5.12386	5.3928	4.84714	4.87559	4.86619	5.13765	5.28301	4.85998	5.20068	4.78541	4.82678	4.73627	4.98811	5.06426	5.02909	5.00598	4.83114	4.6859	5.09133	4.83571	4.84281	4.86502	4.74986	4.75345	5.07539	4.67793	5.04442	4.55239	5.2782	4.68087	5.05713	5.2544	4.91778	4.72965	4.72992	4.94354	4.88295
chr4	49535995	49549546	17425233	ENSMUST00000029987 // Aldob // aldolase B, fructose-bisphosphate // 4 B1|4 22.3 cM // 2	Aldob	ENSMUST00000029987	ENSMUST00000029987 // ENSEMBL // cdna:known chromosome:NCBIM37:4:49548867:49562418:-1 g		6.05107	5.6008	5.87703	5.50415	5.84682	5.889	5.89967	6.03008	6.04279	6.01964	6.16645	5.78202	5.93191	5.85931	5.81321	5.81806	6.14875	5.95757	5.59298	5.93388	5.85331	6.02675	5.67826	5.6598	5.87191	5.91595	6.08546	5.94405	5.89732	5.67104	5.70053	6.12793	6.00568	5.97488	6.22263	5.78969	6.06777	5.94595	5.96925	6.14164	5.9556
chr4	47008316	47010781	17425120	BC028561 // Gm568 // predicted gene 568 // 4 B1|4 // 230143	Gm568	BC028561	BC028561 // GenBank // Mus musculus gene model 568, (NCBI), mRNA (cDNA clone IMAGE:1380		7.20723	6.79088	7.1327	6.82666	6.91546	6.87999	7.00814	7.00602	6.72586	6.79099	7.01628	6.87642	7.15122	7.05872	6.99648	6.95535	7.02502	7.16002	7.10015	6.97578	6.87913	6.81762	7.02659	6.64576	7.00874	6.83764	6.98838	7.04758	6.95223	6.60262	6.89877	7.19505	7.04094	7.03599	7.37104	6.80428	7.08715	7.02151	7.08829	7.12401	7.15539
chr4	44531145	44711446	17424884	ENSMUST00000014174 // Pax5 // paired box gene 5 // 4 B1|4 20.7 cM // 18507 /// NM_00878	Pax5	ENSMUST00000014174	ENSMUST00000014174 // ENSEMBL // cdna:known chromosome:NCBIM37:4:44544017:44724318:-1 g		6.31272	5.67885	5.78279	6.30072	5.89844	5.91025	5.95732	5.87781	5.77165	5.77326	5.93654	5.91472	5.89974	6.12201	6.47762	7.62292	5.98411	6.48513	5.96807	5.83614	5.74692	5.72376	5.70815	5.7153	6.04086	5.89238	6.25828	5.7301	5.79085	5.74143	6.10682	5.76841	5.78016	6.04777	6.08988	5.762	6.31181	6.15824	5.44854	6.27313	5.71362
chr4	9267323	9269915	17423133	---		---	AK081058 // GenBank HTC // Mus musculus 10 days neonate cerebellum cDNA, RIKEN full-len		4.47887	4.82803	4.60462	4.51355	4.97687	4.57292	4.74963	4.84638	5.0169	4.58768	4.98015	4.4902	4.69106	4.70412	5.09084	4.44988	4.70633	4.71035	4.58551	4.67613	4.44828	4.14855	4.83203	4.51974	4.4565	4.27459	4.61834	4.44053	4.85828	4.66408	4.94255	4.62598	5.02673	4.54252	4.72005	4.71166	4.73243	4.66258	4.50764	4.63431	4.35553
chr4	37339661	37339720	17412719	---		---	ENSMUST00000157146 // ENSEMBL // ncrna:snRNA chromosome:NCBIM37:4:37286694:37286753:1 g		2.93744	3.18721	3.28415	3.98623	2.96	3.31075	3.04792	3.09902	3.02262	3.13901	3.99464	3.22002	4.1263	3.87436	3.22128	3.14178	3.66241	3.36433	2.88299	3.30745	3.27337	3.63196	3.14443	2.90268	3.08567	3.12376	4.36852	3.40564	3.09861	2.7379	3.08923	3.08326	3.37358	3.03005	4.72028	3.23811	5.14364	3.15714	3.31377	3.35526	3.19925
chr4	43030999	43032482	17413213	ENSMUST00000030169 // Stoml2 // stomatin (Epb7.2)-like 2 // 4|4 B1 // 66592 /// ENSMUST	Stoml2	ENSMUST00000030169	ENSMUST00000030169 // ENSEMBL // cdna:known chromosome:NCBIM37:4:43040562:43044582:-1 g		7.00791	6.71002	6.84343	6.80266	6.94489	6.89012	6.83126	6.95045	6.68424	6.85678	7.17412	6.66937	7.12454	6.88292	6.72133	6.85519	6.8197	6.8215	6.81693	6.62983	6.49073	6.74275	6.8459	6.42878	6.82423	6.6501	6.85906	6.75157	6.8671	6.69461	6.84812	6.71886	6.92298	6.83658	6.95863	6.64429	7.1898	7.04681	6.69204	6.63998	6.57982
chr4	42868003	42874234	17424483	NM_177785 // BC049635 // cDNA sequence BC049635 // 4 A5|4 // 277773 /// ENSMUST00000055	BC049635	NM_177785	NM_177785 // RefSeq // Mus musculus cDNA sequence BC049635 (BC049635), mRNA. // chr4 //		4.14019	4.78825	4.49459	5.46657	4.42962	5.28951	4.54928	4.3756	4.57515	4.65967	5.38552	4.57306	4.74166	4.4358	4.33391	4.62749	4.64095	4.54965	4.383	4.43925	4.48862	4.24796	4.49644	4.33601	4.33058	4.29549	4.29499	4.29252	4.69972	4.57276	4.4351	4.45572	4.93838	4.19473	4.35311	4.50316	4.7494	4.80372	4.48162	4.75497	4.75525
chr4	40682078	40703194	17424042	NM_025545 // Aptx // aprataxin // 4|4 B1 // 66408 /// NM_001025444 // Aptx // aprataxin	Aptx	NM_025545	NM_025545 // RefSeq // Mus musculus aprataxin (Aptx), transcript variant 1, mRNA. // ch		7.20201	7.35837	7.57366	7.61251	7.25018	7.11694	7.48344	7.08772	7.24213	6.90015	7.23376	7.3411	7.13873	7.34263	7.28697	7.632	7.25772	7.09859	7.40048	7.29689	6.92995	7.24675	7.10176	7.24033	7.48212	7.03851	7.46062	7.14933	7.32935	7.18882	7.49448	7.32203	7.43126	7.23773	7.14977	7.44353	7.56721	7.39617	7.47618	7.1386	7.53728
chr4	45234723	45243990	17424933	NR_040666 // 2900093L17Rik // RIKEN cDNA 2900093L17 gene // 4|4 // 78508	2900093L17Rik	NR_040666	NR_040666 // RefSeq // Mus musculus RIKEN cDNA 2900093L17 gene (2900093L17Rik), non-cod		4.23541	4.58548	4.49359	4.53598	4.57881	4.24824	4.67993	4.49018	3.93583	4.70245	4.3728	4.3304	4.17423	4.36615	4.02826	3.84364	3.98764	4.36467	3.91786	3.98272	4.45825	3.85092	4.45078	4.22857	3.91079	3.77342	4.40901	4.48058	4.18364	4.84557	4.12084	4.28365	4.27265	4.29442	4.66754	4.25605	4.16468	4.60052	4.01008	4.61914	4.02479
chr4	41291300	41314901	17424203	NM_026893 // Dcaf12 // DDB1 and CUL4 associated factor 12 // 4|4 B1 // 68970 /// ENSMUS	Dcaf12	NM_026893	NM_026893 // RefSeq // Mus musculus DDB1 and CUL4 associated factor 12 (Dcaf12), mRNA.		10.8323	10.8492	11.0367	10.7153	11.0012	10.9375	10.8261	10.7691	10.9023	10.8251	11.0425	10.7104	11.0541	10.827	10.2729	10.8089	10.9749	10.4456	10.7786	11.0584	11.0925	10.8891	10.7915	10.9604	10.9667	10.9557	11.0748	10.7129	10.9277	10.9337	10.8153	10.6996	10.941	10.8552	10.8472	10.9202	10.8339	11.0536	11.0487	10.9939	11.0366
chr4	47197487	47208459	17425147	---		---	ENSMUST00000153083 // ENSEMBL // cdna:known chromosome:NCBIM37:4:47210359:47221331:-1 g		5.79298	5.73863	5.75118	5.47971	5.94487	5.89151	6.15442	6.04061	5.75809	5.97625	6.19455	6.01392	5.90008	5.85739	5.82859	6.05761	5.92165	5.84587	5.92724	5.575	5.87855	5.80734	5.98253	5.79914	5.88945	6.29301	6.05658	5.74595	6.10627	5.87629	6.04191	6.12914	5.96665	5.66127	5.84345	5.83276	5.76189	6.07071	5.74381	6.04846	5.75635
chr4	7560688	7573801	17411626	NR_040645 // 8430436N08Rik // RIKEN cDNA 8430436N08 gene // 4|4 // 71510	8430436N08Rik	NR_040645	NR_040645 // RefSeq // Mus musculus RIKEN cDNA 8430436N08 gene (8430436N08Rik), non-cod		3.14359	3.44131	3.12224	3.82636	3.24614	3.45006	3.50421	3.28234	3.36549	3.54386	3.39876	3.32029	3.36363	3.30259	3.23051	3.29144	3.33117	3.38703	3.41282	3.43741	3.4023	3.36294	3.48714	3.42074	3.17723	3.57626	3.39532	3.21458	3.15068	3.10882	3.55459	3.3736	3.31491	3.43801	3.43152	3.1493	3.37709	3.37573	3.22671	3.42464	3.4077
chr4	45762377	45764223	17424968	NR_046068 // Gm12409 // predicted gene 12409 // 4 B1|4 // 100040567	Gm12409	NR_046068	NR_046068 // RefSeq // Mus musculus predicted gene 12409 (Gm12409), non-coding RNA. //		4.79545	4.88248	4.74581	4.64357	4.82822	4.75748	4.71308	4.7747	5.19664	4.83593	5.03901	5.04637	4.60011	4.75336	4.27141	4.4322	4.68515	4.93965	4.59847	4.5361	4.9099	4.71118	5.29087	4.50147	4.57322	4.86885	4.99086	4.79384	4.64847	5.52312	4.50112	4.72335	4.65776	4.57931	5.09475	4.70156	4.91897	4.99386	4.54627	4.77197	4.46131
chr4	43781365	43782327	17424813	NR_033638 // Olfr29-ps1 // olfactory receptor 29, pseudogene 1 // 4 B1|4 // 29848	Olfr29-ps1	NR_033638	NR_033638 // RefSeq // Mus musculus olfactory receptor 29, pseudogene 1 (Olfr29-ps1), n		3.90401	4.15128	3.8798	3.79529	4.14822	3.99409	3.68741	3.81179	3.67743	3.94688	4.02314	3.90448	3.9165	4.04596	4.06881	4.03025	3.88483	3.7042	4.04615	4.07	3.89704	3.96843	3.8487	3.79344	3.89148	3.60895	4.01967	3.87536	3.42111	3.80341	4.09425	3.95436	3.79567	3.59692	3.83803	3.8918	4.40285	4.00378	4.00201	4.22353	3.81352
chr4	47091909	47123070	17413852	NM_172693 // Galnt12 // UDP-N-acetyl-alpha-D-galactosamine:polypeptide N-acetylgalactos	Galnt12	NM_172693	NM_172693 // RefSeq // Mus musculus UDP-N-acetyl-alpha-D-galactosamine:polypeptide N-ac		6.5294	7.27038	7.26023	6.5468	6.76994	6.44305	6.76512	6.08472	6.17395	7.19865	6.47311	6.79543	6.07148	6.99153	6.36739	6.70234	6.88955	7.5511	6.60486	6.8799	6.45269	6.81186	6.74478	6.95475	6.93615	7.37967	6.99616	6.71053	6.825	6.23717	7.68248	7.28106	6.8388	6.60065	6.67484	6.69164	6.60909	6.87295	6.12326	6.72596	6.24284
chr4	19514490	19514779	17423523	---		---	ENSMUST00000158465 // ENSEMBL // ncrna:misc_RNA chromosome:NCBIM37:4:19441637:19441926:		5.0085	5.21096	4.93207	5.70691	5.17747	5.45003	5.57375	5.04551	5.12769	5.05589	5.41905	5.22343	5.42832	5.26795	5.33387	5.38608	5.11991	5.38186	5.47728	5.1194	4.75859	5.46556	5.02589	4.95774	5.2507	5.06021	5.06046	5.02584	5.26631	4.81891	5.38479	5.21313	5.76854	5.10739	5.44379	5.09953	5.28027	5.32279	5.17137	5.24753	5.01194
chr4	40458939	40459033	17424032	---		---	ENSMUST00000158960 // ENSEMBL // ncrna:snoRNA chromosome:NCBIM37:4:40405972:40406066:-1		3.80097	3.87545	4.22605	5.17445	3.92655	4.01089	3.88615	4.00218	4.09993	4.02057	4.072	4.14025	4.2621	4.18572	3.58238	4.38004	3.98641	4.04854	3.71593	4.11221	3.97394	3.97236	3.69562	3.72683	4.17718	4.01558	4.38122	4.00243	3.79673	4.22713	4.11335	4.13243	4.13804	4.19889	4.16817	4.2664	4.05803	4.12699	4.02554	4.10849	5.10452
chr4	41738493	41756157	17424319	ENSMUST00000059354 // Sigmar1 // sigma non-opioid intracellular receptor 1 // 4|4 A5-B2	Sigmar1	ENSMUST00000059354	ENSMUST00000059354 // ENSEMBL // cdna:known chromosome:NCBIM37:4:41685366:41688232:-1 g		8.10235	8.04696	8.13238	8.33136	7.99524	7.91259	8.14715	8.30328	8.20693	8.26491	7.61185	8.23628	7.89364	8.04043	7.56662	8.2487	8.31951	7.83744	7.97193	8.11209	8.06788	8.2309	8.14738	7.99534	8.33476	8.36469	8.10651	8.09443	8.15877	8.12107	7.97008	8.28739	7.95699	8.08005	7.72813	7.99835	7.76446	8.14796	8.07679	8.02792	8.04459
chr4	11122805	11126998	17411744	XR_107585 // Gm11827 // predicted gene 11827 // --- // 100503518 /// XR_107584 // Gm118	Gm11827	XR_107585	XR_107585 // RefSeq // PREDICTED: Mus musculus predicted gene 11827, transcript variant		5.37441	5.11375	5.30664	4.92822	5.15738	5.0136	4.95595	5.37312	4.97325	4.77698	5.26803	5.601	4.87737	5.05264	5.11922	5.16242	5.35252	5.16878	5.23062	4.73565	5.03965	4.86795	4.96655	4.41361	5.33691	4.91645	5.11244	5.0963	4.86782	5.03561	5.1196	5.35646	4.99269	5.04367	5.38015	5.05507	5.44639	5.00254	4.72575	4.88971	5.03405
chr4	38571667	38855483	17423966	---		---	AK085953 // GenBank HTC // Mus musculus 16 days neonate heart cDNA, RIKEN full-length e		3.71886	4.21104	3.97578	4.25812	4.11505	3.95127	3.93709	4.25169	4.06118	3.88375	4.17076	3.80835	3.91212	4.16716	3.95913	4.05877	4.15509	4.07422	3.84417	3.94094	4.0027	3.73191	3.90212	4.0108	3.76794	4.05688	4.10038	3.92157	4.26102	3.92985	4.32012	4.09397	3.72989	3.82054	3.82814	3.71701	4.26956	3.95282	3.52434	3.70478	3.84373
chr4	43017635	43025819	17424536	NM_020035 // Pigo // phosphatidylinositol glycan anchor biosynthesis, class O // 4|4 B1	Pigo	NM_020035	NM_020035 // RefSeq // Mus musculus phosphatidylinositol glycan anchor biosynthesis, cl		8.21347	8.27117	8.44256	8.62055	8.21025	8.26734	8.26786	8.23821	8.20302	8.50174	8.2081	8.36871	8.31106	8.36142	8.13875	8.62592	8.17438	8.44129	8.38504	8.2908	8.3476	8.39846	8.20274	8.32339	8.51244	8.59474	8.3627	8.03719	8.12985	8.14464	8.50139	8.30114	8.37708	8.14226	8.33655	8.40347	8.52877	8.2838	8.37586	8.46794	8.23715
chr4	51812483	51812647	17425278	NR_004412 // Rnu1b1 // U1b1 small nuclear RNA // 3 41.6 cM // 19844 /// NR_024200 // Rn	Rnu1b1	NR_004412	NR_004412 // RefSeq // Mus musculus U1b1 small nuclear RNA (Rnu1b1), small nuclear RNA.		9.21637	8.69042	7.84089	10.4548	8.90756	9.26461	8.44101	7.41059	7.61177	8.00656	8.86479	8.5666	9.85379	8.38673	11.3377	9.10611	7.95865	11.4178	8.822	8.28798	7.24852	8.29157	8.18062	7.4844	8.08533	8.25868	9.27961	8.77894	8.39013	6.87407	7.72012	7.46247	8.8405	8.41582	8.28744	8.24138	7.9121	8.24801	7.96225	9.13552	7.63226
chr4	19876838	19922605	17423577	ENSMUST00000029900 // Atp6v0d2 // ATPase, H+ transporting, lysosomal V0 subunit D2 // 4	Atp6v0d2	ENSMUST00000029900	ENSMUST00000029900 // ENSEMBL // cdna:known chromosome:NCBIM37:4:19803988:19849752:-1 g		5.79981	7.14831	5.28474	4.89925	8.41226	6.25168	5.79877	4.57276	4.93915	6.69647	5.5138	6.01603	5.89333	5.09772	5.9126	5.73389	5.42988	5.62052	6.93866	6.68284	5.3037	4.90243	6.56818	4.2482	7.41465	5.4492	5.63333	6.09569	5.10362	5.43083	7.82347	6.15992	5.80243	5.29433	5.96848	6.58331	7.431	6.45924	6.69015	4.66536	7.14096
chr4	45799022	45804608	17413674	NM_028270 // Aldh1b1 // aldehyde dehydrogenase 1 family, member B1 // 4|4 B2 // 72535 /	Aldh1b1	NM_028270	NM_028270 // RefSeq // Mus musculus aldehyde dehydrogenase 1 family, member B1 (Aldh1b1		5.9013	6.14562	5.44939	6.0547	6.69573	5.57998	5.82778	5.86617	5.49868	6.25234	5.9831	5.93828	5.98928	5.70991	5.78117	6.30397	5.94938	6.76175	6.40777	5.98814	5.52096	5.49512	6.13688	5.54324	6.6164	6.12596	6.67979	5.93573	6.01789	5.31277	5.70024	5.80157	5.86753	5.69052	6.17023	5.90013	6.19359	5.98098	6.86466	6.35746	5.86261
chr4	6365650	6408423	17411605	ENSMUST00000029912 // Sdcbp // syndecan binding protein // 4 A1|4 // 53378 /// NM_00109	Sdcbp	ENSMUST00000029912	ENSMUST00000029912 // ENSEMBL // cdna:known chromosome:NCBIM37:4:6292797:6323431:1 gene		8.7032	8.87374	9.10108	8.47634	8.77421	8.8241	9.09941	8.76634	9.21494	8.77246	8.97266	8.88943	9.00844	8.71724	8.53466	8.68032	8.89638	8.45261	8.85119	8.76341	9.16564	9.03648	8.63874	9.1275	8.91292	9.04398	8.99314	8.92962	8.86244	9.15634	8.94051	8.95036	9.35434	9.02712	8.66192	8.95244	8.63793	8.97325	8.90454	8.53168	8.8671
chr4	45848664	45887008	17413678	ENSMUST00000107783 // 1300002K09Rik // RIKEN cDNA 1300002K09 gene // 4 B1|4 // 74152 //	1300002K09Rik	ENSMUST00000107783	ENSMUST00000107783 // ENSEMBL // cdna:known chromosome:NCBIM37:4:45861536:45899880:1 ge		5.72658	5.93476	5.87532	6.12581	6.43834	5.9365	6.05762	6.24335	5.6476	5.68507	6.10929	5.67715	5.98166	6.19793	5.79494	5.84324	5.89493	6.33779	5.94069	5.62766	6.0541	5.86513	5.99292	5.57564	5.72661	6.01278	6.76895	5.75032	5.93427	5.63232	6.05157	6.12224	6.16748	6.02509	6.02903	5.63571	6.14045	5.94303	5.90625	6.09355	5.62317
chr4	19716732	19720199	17423572	---		---	ENSMUST00000124319 // ENSEMBL // havana:lincRNA chromosome:NCBIM37:4:19643879:19647033:		3.73229	3.66004	3.57169	3.68401	3.5449	3.56442	3.8293	3.56673	3.55395	3.587	3.71638	3.3746	3.74545	3.65298	3.50032	3.38071	3.69644	3.91027	3.66212	3.73579	3.65484	3.35029	3.64183	3.67425	3.48965	3.46872	3.52131	3.72736	3.67464	3.67837	3.72614	3.82224	3.9548	3.78344	3.70318	3.8718	4.09505	3.65525	3.63243	3.86044	3.53429
chr4	49512596	49521093	17425228	NM_178603 // Mrpl50 // mitochondrial ribosomal protein L50 // 4 B1|4 24.0 cM // 28028 /	Mrpl50	NM_178603	NM_178603 // RefSeq // Mus musculus mitochondrial ribosomal protein L50 (Mrpl50), nucle		8.90823	9.09668	8.99238	9.28885	8.90181	8.54499	9.29889	9.06518	8.76133	9.11213	8.5656	8.9513	8.41905	9.01542	8.78048	9.26466	9.13557	8.75105	8.75275	8.99663	9.0837	8.91066	8.90804	8.84194	9.48779	9.43566	9.15279	8.91365	9.4002	8.82176	9.02679	9.3527	8.85277	8.9675	8.78586	9.09966	8.94271	9.11187	9.10415	9.29181	9.2639
chr4	32559680	32571708	17423741	NM_001109661 // Bach2 // BTB and CNC homology 2 // 4 A4|4 // 12014 /// ENSMUST000001081	Bach2	NM_001109661	NM_001109661 // RefSeq // Mus musculus BTB and CNC homology 2 (Bach2), mRNA. // chr4 //		5.29925	5.15864	5.33253	5.23329	5.39461	5.2073	5.09033	5.4542	5.10926	5.00494	5.58458	5.25519	5.92217	5.29884	5.10174	4.78517	5.45604	5.14659	5.24867	5.14268	5.13371	5.43832	5.18812	5.33932	5.21983	5.19124	5.35538	5.23795	5.18723	5.23889	5.11889	5.53553	5.5236	5.36781	5.23255	4.92469	5.22722	5.44967	5.24333	5.31356	5.1966
chr4	44991242	45012412	17424907	NM_001163284 // Zbtb5 // zinc finger and BTB domain containing 5 // 4 B1|4 // 230119 //	Zbtb5	NM_001163284	NM_001163284 // RefSeq // Mus musculus zinc finger and BTB domain containing 5 (Zbtb5),		7.06976	7.38818	7.25252	7.03157	7.13904	7.1857	7.14381	6.84412	6.69637	7.05512	7.12974	7.0357	7.28662	7.00993	6.83303	7.457	7.40088	7.31321	7.42416	7.22734	6.8854	7.34312	7.20193	6.90456	7.28469	7.2407	7.46678	6.67951	7.0822	6.99709	7.42629	7.22033	7.41442	7.16525	7.0458	7.51092	7.29292	7.37406	7.46341	7.52821	7.14705
chr4	40720154	40722413	17424054	---		---	---		6.74163	7.17644	7.11688	6.60196	6.79472	6.31678	7.15028	6.57446	6.79766	6.44154	6.08443	7.19251	6.40933	6.60372	5.84083	7.15251	6.75419	6.27847	6.6825	6.97528	7.01018	6.64478	6.92716	7.33062	7.59462	7.26457	7.33128	6.81716	7.39973	6.74622	7.03984	7.00728	6.27234	6.75101	6.79833	7.28259	6.97486	6.78363	7.4657	6.78788	7.27644
chr4	34688559	34730206	17423867	NM_027041 // 1700003M02Rik // RIKEN cDNA 1700003M02 gene // 4 A5|4 // 69329 /// ENSMUST	1700003M02Rik	NM_027041	NM_027041 // RefSeq // Mus musculus RIKEN cDNA 1700003M02 gene (1700003M02Rik), mRNA. /		5.67329	5.45615	5.35675	5.53521	5.42285	5.25458	5.42656	5.39369	5.21972	5.27061	5.36045	5.43788	5.2576	5.13169	5.79071	5.30897	5.38367	5.70596	5.47083	5.19768	5.30582	5.40434	5.56307	5.024	5.38837	5.18952	5.2697	5.23272	5.11955	5.34518	5.77054	5.54759	5.25873	5.32699	5.52251	5.19014	5.28004	5.39431	5.23665	5.34559	5.03734
chr4	43492900	43495921	17413339	NM_001037913 // Ccdc107 // coiled-coil domain containing 107 // 4 B1|4 // 622404 /// EN	Ccdc107	NM_001037913	NM_001037913 // RefSeq // Mus musculus coiled-coil domain containing 107 (Ccdc107), mRN		6.73625	6.8202	6.91594	7.18712	6.96625	6.67526	6.73423	6.87545	6.82567	7.00684	6.93575	6.78112	6.8244	6.76913	7.18149	6.96684	6.89087	6.88076	6.95853	6.9652	6.53406	6.81165	6.70886	6.88721	6.59083	6.80744	7.01078	6.729	6.86587	6.57458	6.77591	6.3085	7.03219	6.73034	6.33717	6.71073	6.68286	6.98303	7.05196	6.98775	6.82161
chr4	25248586	25281821	17423674	NM_026194 // 1810074P20Rik // RIKEN cDNA 1810074P20 gene // 4 A3|4 // 67490 /// ENSMUST	1810074P20Rik	NM_026194	NM_026194 // RefSeq // Mus musculus RIKEN cDNA 1810074P20 gene (1810074P20Rik), mRNA. /		8.49515	8.80865	9.00196	8.7481	8.30318	8.76691	9.01951	10.2988	9.4049	8.9161	8.70529	8.9104	8.96526	9.08207	8.96342	8.94912	9.03011	8.65516	8.77417	8.86509	9.46809	9.36925	9.093	9.26816	9.02278	8.90023	9.00392	9.10519	8.8429	9.88882	9.18764	8.9316	8.67212	8.94071	8.61649	9.20435	8.88207	8.97945	8.72176	8.62062	9.13053
chr4	43983504	43985533	17413507	NM_001002787 // Ccin // calicin // 4 B1|4 // 442829 /// ENSMUST00000095107 // Ccin // c	Ccin	NM_001002787	NM_001002787 // RefSeq // Mus musculus calicin (Ccin), mRNA. // chr4 // 100 // 100 // 2		4.19776	4.18224	4.25048	4.43553	4.10529	4.40925	4.16866	4.30645	3.78719	4.01923	4.62774	4.15897	4.52329	4.15108	4.56116	4.46761	4.54691	4.53285	4.55568	4.16897	4.19746	4.23425	4.24251	4.04141	4.33395	4.10857	4.32129	4.3634	4.30712	4.22115	4.12733	4.03027	4.09604	4.09105	4.10024	4.38547	4.37887	4.45497	4.40989	4.53012	4.37487
chr4	20007938	20030785	17412092	NM_015767 // Ttpa // tocopherol (alpha) transfer protein // 4 A3|4 22.7 cM // 50500 ///	Ttpa	NM_015767	NM_015767 // RefSeq // Mus musculus tocopherol (alpha) transfer protein (Ttpa), mRNA. /		5.70795	5.75742	5.97419	5.5697	5.88302	5.19694	5.43095	5.34524	4.93976	5.54074	5.72603	6.09501	5.85682	5.84895	4.82046	5.54957	5.80226	5.87627	5.49107	5.7733	4.80711	5.65254	4.95544	4.92821	5.64899	5.06404	6.03539	5.28951	5.36772	5.14338	6.0647	5.40128	5.84134	5.59984	5.18287	5.85793	5.19874	5.97769	5.15312	4.86755	5.16145
chr4	42170845	42171335	17413057	---		---	ENSMUST00000165573 // ENSEMBL // cdna:known chromosome:NCBIM37:4:42041568:42042058:1 ge		5.42324	5.8254	5.38653	5.54491	5.60781	5.72094	5.3599	5.81708	5.27765	5.25722	6.01791	5.25213	5.90287	5.39868	5.68587	5.23618	5.63906	5.71492	5.72201	5.48908	5.74909	5.60743	5.55249	5.25886	5.32116	5.75209	5.49923	5.2546	5.53158	5.28449	5.57519	5.58581	5.56082	5.41704	5.52154	5.43092	5.53006	5.45323	5.24755	5.67198	5.11095
chr4	42668004	42668494	17413154	---		---	ENSMUST00000165573 // ENSEMBL // cdna:known chromosome:NCBIM37:4:42041568:42042058:1 ge		5.42324	5.8254	5.38653	5.54491	5.60781	5.72094	5.3599	5.81708	5.27765	5.25722	6.01791	5.25213	5.90287	5.39868	5.68587	5.23618	5.63906	5.71492	5.72201	5.48908	5.74909	5.60743	5.55249	5.25886	5.32116	5.75209	5.49923	5.2546	5.53158	5.28449	5.57519	5.58581	5.56082	5.41704	5.52154	5.43092	5.53006	5.45323	5.24755	5.67198	5.11095
chr4	43631539	43641533	17424768	---		---	ENSMUST00000137535 // ENSEMBL // cdna:known chromosome:NCBIM37:4:43644411:43654405:-1 g		6.63493	7.04358	6.78492	6.04796	6.32282	6.57337	7.04028	6.85902	6.30626	6.60079	6.72063	6.57289	6.57443	6.47067	6.73525	6.36996	6.65556	6.53144	6.78929	6.51141	6.25217	6.34048	6.68414	6.2607	6.53131	6.71692	6.70836	6.56955	6.6679	6.33851	6.77074	6.69324	6.57466	6.5635	6.33446	6.5503	7.23176	6.80657	7.0285	7.004	6.28552
chr4	43705628	43710231	17424807	ENSMUST00000107862 // Olfr71 // olfactory receptor 71 // 4 B1|4 // 56015 /// NM_019486	Olfr71	ENSMUST00000107862	ENSMUST00000107862 // ENSEMBL // cdna:known chromosome:NCBIM37:4:43718500:43723103:-1 g		5.36853	5.40986	5.43969	5.34003	5.59451	5.76551	5.61273	5.30307	5.16972	5.26391	5.84485	5.11422	5.61386	5.35237	5.52364	5.22648	5.45559	5.61318	5.42812	5.36477	5.47643	5.42873	5.25501	5.19865	5.37961	5.41224	5.39365	5.33521	5.35761	5.0931	5.31432	5.54735	5.45377	5.44683	5.7581	5.07284	5.47326	5.49006	5.48384	5.7339	5.27445
chr4	22396570	22396702	17412227	---		---	ENSMUST00000104373 // ENSEMBL // ncrna:snoRNA chromosome:NCBIM37:4:22323717:22323849:1		4.7534	5.13818	5.26463	5.3024	5.01148	4.72815	4.81052	5.05875	5.07018	5.87687	4.66113	5.4385	4.89204	4.86665	4.9175	5.17718	4.63516	5.10612	4.60669	4.7473	5.17247	5.25424	5.3965	5.17441	4.8419	4.82782	5.11122	5.00021	5.5024	5.30785	4.99436	5.06405	5.13636	4.55338	5.20907	4.21619	5.36178	4.60471	5.21809	5.1045	4.94501
chr4	43267159	43373831	17413269	NM_177195 // Atp8b5 // ATPase, class I, type 8B, member 5 // 4 A5|4 // 320571 /// ENSMU	Atp8b5	NM_177195	NM_177195 // RefSeq // Mus musculus ATPase, class I, type 8B, member 5 (Atp8b5), mRNA.		4.35278	4.63943	4.55868	4.40273	4.56502	4.71715	4.48427	5.19672	4.54541	3.93816	4.69761	4.34559	4.5319	4.18957	4.53193	4.58797	4.07471	4.70922	4.55215	4.49111	4.42008	4.48043	4.93518	4.46977	4.55176	4.29555	4.56502	4.3892	4.00363	4.90586	4.40084	4.34131	4.89461	4.5598	4.57043	4.02052	4.47498	4.3875	4.70813	4.68121	4.06061
chr4	43504428	43508747	17424651	NM_139305 // Car9 // carbonic anhydrase 9 // 4 B1|4 // 230099 /// ENSMUST00000030183 //	Car9	NM_139305	NM_139305 // RefSeq // Mus musculus carbonic anhydrase 9 (Car9), mRNA. // chr4 // 100 /		5.93168	5.90936	6.54744	6.58285	6.21432	5.56502	6.2388	6.81276	6.81175	6.40792	5.90877	6.12702	6.17635	6.01959	6.10109	5.75449	6.32596	6.18463	5.86059	6.44665	6.78231	5.91482	6.3419	6.373	6.58658	6.28187	6.09076	6.13767	6.31866	6.51079	6.14355	6.15292	5.96818	6.42217	5.58194	6.01509	6.14759	6.23444	6.18123	6.06551	5.84356
chr4	43032414	43046220	17424573	NM_001253353 // B230312A22Rik // RIKEN cDNA B230312A22 gene // 4 A5|4 // 230088 /// NM_	B230312A22Rik	NM_001253353	NM_001253353 // RefSeq // Mus musculus RIKEN cDNA B230312A22 gene (B230312A22Rik), tran		6.82023	6.88037	6.66881	6.50371	7.11386	7.09226	6.56922	7.42075	7.01015	6.5203	6.99644	6.5819	6.68981	6.5723	6.4722	6.86634	6.54858	7.18744	6.66742	6.86359	7.01969	6.98266	6.81297	6.76344	6.81672	6.73603	6.44917	6.6177	6.44793	6.88002	6.79466	6.70444	6.60091	6.848	6.80526	6.6247	6.94162	6.78099	6.55746	6.58908	6.99498
chr4	11999474	12009043	17423337	---		---	AK076817 // GenBank HTC // Mus musculus adult male testis cDNA, RIKEN full-length enric		3.92793	4.07606	4.06506	4.97692	4.72297	4.25173	4.18533	4.22247	4.11272	3.92254	4.16183	4.33817	4.1707	3.95259	4.20766	4.32676	4.46424	4.39247	4.10332	4.12897	4.26958	4.2698	4.13882	4.22316	4.15412	4.37849	4.03515	4.04732	4.1431	3.89355	3.99582	3.80329	4.02837	4.12142	4.18051	4.05576	4.30495	4.15395	4.1185	4.41738	4.12209
chr4	20118874	20778866	17423601	ENSMUST00000102998 // Nkain3 // Na+/K+ transporting ATPase interacting 3 // 4 A3|4 // 2	Nkain3	ENSMUST00000102998	ENSMUST00000102998 // ENSEMBL // cdna:known chromosome:NCBIM37:4:20170989:20706013:-1 g		6.36434	6.75088	7.49162	7.45678	7.11242	6.54502	6.45771	6.23874	5.63543	6.09085	7.05887	8.17502	7.21656	6.9231	6.98604	7.38656	6.21983	6.73297	6.2073	6.85341	6.17984	6.38901	6.16946	5.57155	6.26645	6.00494	6.97412	5.98795	6.70571	5.89404	6.76632	9.18972	7.25557	6.45085	6.79259	6.34493	6.52976	7.24492	6.18795	5.98215	6.96017
chr4	16122733	16163647	17423490	ENSMUST00000037035 // Ripk2 // receptor (TNFRSF)-interacting serine-threonine kinase 2	Ripk2	ENSMUST00000037035	ENSMUST00000037035 // ENSEMBL // cdna:known chromosome:NCBIM37:4:16049880:16090794:-1 g		8.24988	7.86969	7.93462	7.625	7.70836	7.99239	7.86044	8.20654	8.38483	7.8863	7.97639	7.32044	7.92094	7.51671	7.73839	7.86679	8.02104	7.76635	7.94872	8.08433	8.57153	8.37441	7.54924	8.7405	7.69101	7.97605	8.07246	7.78376	7.55428	8.36611	8.54116	7.99582	7.75978	8.0169	8.22415	8.24523	8.291	8.0773	7.94449	7.56509	7.89522
chr4	20041710	20066750	17412102	ENSMUST00000098242 // Ggh // gamma-glutamyl hydrolase // 4 A3|4 // 14590 /// NM_010281	Ggh	ENSMUST00000098242	ENSMUST00000098242 // ENSEMBL // cdna:known chromosome:NCBIM37:4:19969199:19993897:1 ge		7.75974	8.12291	7.99435	7.72669	7.90207	7.42773	8.21074	8.50721	8.57847	7.68429	7.89818	7.94416	7.72955	8.19064	7.27778	8.39287	7.95543	7.57867	7.55659	7.9358	8.25087	8.03392	7.32621	8.52257	7.6424	7.81308	7.99704	8.19393	8.15116	7.99329	8.23973	7.93175	8.1823	8.11406	8.34563	8.19368	7.41836	8.20754	7.23878	7.2813	8.36682
chr4	21847583	21876475	17412166	NM_025669 // Sfrs18 // serine/arginine-rich splicing factor 18 // 4 A3|4 // 66625 /// E	Sfrs18	NM_025669	NM_025669 // RefSeq // Mus musculus serine/arginine-rich splicing factor 18 (Sfrs18), m		8.7154	9.05561	9.12046	8.83248	9.0403	8.71937	9.03614	9.01802	9.13725	8.82985	9.09437	8.82045	8.87931	9.23759	9.03295	9.19281	9.00643	9.10007	9.05247	9.1365	9.31031	9.14601	8.95278	9.11205	9.3161	9.12671	9.45956	9.26037	9.04271	9.26584	9.60826	8.99587	9.05587	9.15184	8.93438	9.42417	9.32543	8.90424	9.17373	9.09956	9.33063
chr4	41114427	41124455	17424128	ENSMUST00000030138 // Nol6 // nucleolar protein family 6 (RNA-associated) // 4 A5|4 //	Nol6	ENSMUST00000030138	ENSMUST00000030138 // ENSEMBL // cdna:known chromosome:NCBIM37:4:41061460:41071488:-1 g		8.15805	8.26624	8.33012	7.95299	8.26655	8.25843	8.22701	8.20649	8.32168	8.57715	7.97573	7.84277	8.01473	8.07921	8.27124	8.53078	7.90901	8.09124	8.21999	8.3618	8.22186	7.91982	8.12467	8.57383	8.38461	8.35791	7.81369	7.97522	7.97396	8.0609	8.17431	8.43453	8.41994	8.2393	8.45206	8.16438	8.07421	8.29322	8.68803	8.44524	8.28723
chr4	34130854	34134800	17412640	---		---	ENSMUST00000152086 // ENSEMBL // havana:lincRNA chromosome:NCBIM37:4:34217829:34221775:		4.83321	4.8056	4.85826	5.11542	5.4826	5.11579	4.98658	5.01823	5.06427	5.09274	5.58327	4.79129	4.97446	4.89788	5.11498	4.3492	4.87056	5.26037	5.32041	4.88422	4.92077	4.96683	5.07855	5.12927	4.79053	5.02125	5.31946	4.9791	5.29625	5.01914	5.03407	5.05013	5.02283	4.95907	5.2762	4.65691	5.4942	4.96529	4.9768	4.56763	4.62455
chr4	18407349	18891842	17412033	---		---	ENSMUST00000133363 // ENSEMBL // cdna:known chromosome:NCBIM37:4:18334496:18818989:1 ge		3.42575	3.36038	3.60207	3.89942	3.6331	3.69949	3.89955	3.78783	3.26725	3.61443	3.67302	3.54165	3.54269	3.32093	3.60898	4.3589	3.47779	3.6781	3.47501	3.37864	3.47195	3.81693	3.61178	3.41857	3.45656	3.51543	3.55434	3.46302	3.70895	4.1328	3.69875	3.75721	3.50859	3.54455	3.70125	3.6854	3.56261	3.58778	3.61093	3.62407	3.55301
chr4	43820335	43821433	17424815	NM_019474 // Olfr156 // olfactory receptor 156 // 4 B1|4 // 29846 /// ENSMUST0000007946	Olfr156	NM_019474	NM_019474 // RefSeq // Mus musculus olfactory receptor 156 (Olfr156), mRNA. // chr4 //		4.98938	5.08167	5.06396	4.63566	5.20003	5.26884	5.12095	5.77536	5.41691	4.34856	5.36185	5.01066	5.0349	5.28474	4.60395	4.91235	5.69795	5.36854	4.8461	5.3977	5.26536	5.22976	5.0712	5.2442	5.19384	4.95771	5.01178	5.30429	4.98825	5.1021	5.23116	5.56437	5.4189	4.90072	5.48511	5.51095	5.56479	5.04591	5.13262	5.1886	4.88213
chr4	43482081	43483734	17424621	ENSMUST00000030180 // Sit1 // suppression inducing transmembrane adaptor 1 // 4 B1|4 //	Sit1	ENSMUST00000030180	ENSMUST00000030180 // ENSEMBL // cdna:known chromosome:NCBIM37:4:43494953:43496606:-1 g		4.67518	4.22602	4.62721	5.29247	4.91457	4.93109	4.38692	4.79478	4.38694	4.77849	4.43442	4.35072	4.4144	4.28861	4.5766	4.73541	4.70004	4.38856	4.4005	4.42663	4.51553	4.42781	4.53335	4.02411	4.08349	4.63912	4.38366	4.36425	4.21823	4.58072	4.47091	4.68955	4.42819	4.47562	4.75958	4.23444	4.68398	4.16373	4.17732	4.77394	3.98759
chr4	33062999	33095865	17412563	NM_008076 // Gabrr2 // gamma-aminobutyric acid (GABA) C receptor, subunit rho 2 // 4 A5	Gabrr2	NM_008076	NM_008076 // RefSeq // Mus musculus gamma-aminobutyric acid (GABA) C receptor, subunit		5.43665	6.11063	5.55865	5.29296	5.58877	5.74583	5.5154	5.46122	5.06566	5.29598	5.81141	5.49116	5.71863	5.57219	6.38157	5.01284	5.34121	5.74412	5.54643	5.67882	5.40958	5.38133	5.56892	5.34596	5.69975	5.42725	5.56158	5.43785	5.66954	5.10278	5.71349	5.52589	5.61379	5.47361	5.55466	5.70345	5.69388	5.80153	5.89204	6.01767	5.43819
chr4	11485958	11551143	17411786	NM_001081183 // 1110037F02Rik // RIKEN cDNA 1110037F02 gene // 4|4 A2 // 66185 /// ENSM	1110037F02Rik	NM_001081183	NM_001081183 // RefSeq // Mus musculus RIKEN cDNA 1110037F02 gene (1110037F02Rik), mRNA		8.54163	9.2938	8.98413	8.75527	9.0712	8.80823	9.18489	9.24556	9.03367	9.27372	8.88488	8.94342	9.17603	8.95261	8.58079	8.94222	8.98413	8.99685	8.97392	9.21665	9.14639	9.09173	9.05912	9.13304	9.2686	9.31101	9.057	8.84824	9.38827	8.96647	9.18585	9.00278	8.82064	8.96701	8.93803	9.23096	9.1662	8.91081	9.34348	9.29036	9.21817
chr4	44970576	44978319	17424904	---		---	ENSMUST00000150111 // ENSEMBL // cdna:known chromosome:NCBIM37:4:44980641:44983968:1 ge		4.80785	4.75729	5.08888	4.92606	4.9508	4.83469	4.55206	4.92678	4.82841	4.70777	4.96927	4.70387	4.87317	4.59045	4.88636	4.99027	4.84826	5.09244	4.93305	4.85328	4.54221	4.52029	5.02991	4.80575	4.75875	4.26387	4.92526	4.75739	5.1943	4.58851	4.64427	4.99372	4.76058	4.53217	4.92999	4.46457	5.07582	5.20764	5.05991	4.73327	4.55322
chr4	43046034	43053253	17413216	---		---	---		6.24924	5.783	5.86611	5.79841	5.97137	6.08191	5.92595	6.37897	6.16063	5.62575	5.82094	5.75122	5.40773	5.83734	5.65464	6.49619	5.83568	5.72819	5.96598	5.98681	6.34035	5.70503	6.22069	5.90858	5.94944	5.89277	5.97179	5.8172	5.41903	5.76796	6.05246	5.33693	6.3229	5.68404	6.22827	5.80786	6.21898	5.87465	5.75918	5.93675	5.86523
chr4	43875530	43944806	17413474	NM_016678 // Reck // reversion-inducing-cysteine-rich protein with kazal motifs // 4 B1	Reck	NM_016678	NM_016678 // RefSeq // Mus musculus reversion-inducing-cysteine-rich protein with kazal		7.66937	8.59743	7.90315	7.95573	7.9588	7.60649	8.16917	8.25487	7.73882	7.82334	7.7479	7.51843	7.84748	8.10609	8.47859	8.24784	7.97654	9.13117	8.05443	8.29019	7.9547	7.87073	8.43453	8.83838	8.4339	8.72792	8.43872	8.12264	8.03494	7.73585	7.91317	8.61955	8.17567	8.26112	8.24641	7.95533	8.18422	8.16754	8.23304	8.78173	8.06462
chr4	51968094	52051110	17425280	NR_040668 // C630028M04Rik // RIKEN cDNA C630028M04 gene // 4 B2|4 // 329844	C630028M04Rik	NR_040668	NR_040668 // RefSeq // Mus musculus RIKEN cDNA C630028M04 gene (C630028M04Rik), non-cod		3.342	3.61842	3.78192	3.72145	3.8874	3.48919	3.49869	3.6637	3.41429	4.11278	3.81955	3.3569	3.88501	3.46728	3.32155	3.42511	3.62975	3.56671	3.29428	3.5163	3.30763	3.29822	3.61293	3.25636	3.45548	3.44188	3.74507	3.51868	3.53912	3.64143	3.79159	3.86039	3.50083	3.5466	3.70568	3.4698	3.51216	3.53397	3.44825	3.761	3.64321
chr4	49289298	49289403	17414057	---		---	ENSMUST00000082848 // ENSEMBL // ncrna:snRNA chromosome:NCBIM37:4:49302170:49302275:1 g		5.81791	6.59184	6.2502	6.44462	6.70903	6.37615	6.78942	6.11109	6.48431	6.17086	6.10069	6.32644	5.65353	6.52131	6.41527	6.45467	6.68953	6.56496	5.59247	6.22013	6.49235	6.23182	6.11446	6.4535	6.78425	6.81022	6.6873	6.45263	6.48555	6.77109	6.59657	6.80552	6.84217	6.07293	7.09324	6.36162	7.03734	6.75332	7.20496	6.82429	6.48816
chr4	36668510	36668586	17423960	NR_030605 // Mir873 // microRNA 873 // 4|4 // 100124457	Mir873	NR_030605	NR_030605 // RefSeq // Mus musculus microRNA 873 (Mir873), microRNA. // chr4 // 100 //		3.1147	3.227	3.06152	3.75802	3.21938	3.28436	3.19758	3.15702	3.1703	3.18694	3.10409	3.16389	3.64364	3.49259	3.50768	3.41969	3.86372	2.99414	3.61701	3.24248	3.17526	3.34003	2.92078	3.12195	3.36591	3.33462	3.32576	3.13704	3.27001	3.13192	3.44108	3.65234	2.98117	3.24569	3.03517	3.26368	3.14177	3.48442	2.96949	3.0375	2.9865
chr4	40993695	40993758	17412846	NR_037277 // Mir3094 // microRNA 3094 // --- // 100526501	Mir3094	NR_037277	NR_037277 // RefSeq // Mus musculus microRNA 3094 (Mir3094), microRNA. // chr4 // 100 /		5.25742	5.32484	6.06023	4.00313	5.36063	4.45364	5.52794	5.64964	6.64594	5.24274	4.87438	5.19091	4.95057	5.99098	3.48251	4.50956	5.49466	5.21191	5.26697	5.53707	6.71485	5.2054	5.16847	5.77289	5.85321	6.23387	5.48125	5.85948	5.70123	5.77724	5.44676	5.90471	5.4655	5.8839	5.28362	5.58206	5.55689	5.32992	5.87208	5.4931	5.52546
chr4	43751859	43759464	17413466	NR_040667 // A630077J23Rik // RIKEN cDNA A630077J23 gene // 4 B1|4 // 319973	A630077J23Rik	NR_040667	NR_040667 // RefSeq // Mus musculus RIKEN cDNA A630077J23 gene (A630077J23Rik), non-cod		3.76471	3.84232	4.11878	4.06365	4.26043	3.87051	3.90883	3.97447	3.83766	4.63174	4.09499	3.84953	4.17345	4.38863	3.84631	3.56622	4.19545	4.01545	4.04901	4.04738	3.61216	3.80666	4.25033	4.09903	4.22449	4.12331	4.11108	4.4371	4.17128	3.79357	3.91715	4.2496	3.83008	4.2151	4.22201	4.13156	4.37062	4.01725	4.09756	4.08196	3.53182
chr4	49379840	49408151	17425202	NM_145368 // Acnat2 // acyl-coenzyme A amino acid N-acyltransferase 2 // 4 B1|4 // 2091	Acnat2	NM_145368	NM_145368 // RefSeq // Mus musculus acyl-coenzyme A amino acid N-acyltransferase 2 (Acn		4.04687	3.87817	4.16662	4.43748	4.03251	3.88514	3.68577	4.17636	3.8439	3.84462	3.90664	4.23404	3.77005	3.9599	3.22266	3.82539	4.19445	3.63108	3.96334	4.00769	4.0093	3.91375	3.88236	3.81286	3.61052	4.4526	4.25891	4.10167	4.03784	4.07168	3.62367	3.80613	3.84325	4.02562	3.86796	3.91509	3.63724	4.06559	3.92625	3.88368	3.90694
chr4	40313232	40317719	17412763	NR_040663 // 4930509K18Rik // RIKEN cDNA 4930509K18 gene // 4 A5|4 // 75819	4930509K18Rik	NR_040663	NR_040663 // RefSeq // Mus musculus RIKEN cDNA 4930509K18 gene (4930509K18Rik), non-cod		3.71677	3.76173	3.52685	3.68058	3.93697	4.19509	3.71723	3.83913	3.77479	3.57631	4.04012	3.79961	3.64553	3.76734	3.85897	3.70183	3.85085	3.93302	4.10687	3.96871	3.77922	3.89687	4.04312	3.46916	3.66726	3.72009	3.86425	3.89446	3.53857	3.68645	3.90248	3.77822	4.07685	3.71539	3.6678	3.6328	3.686	3.96114	3.91868	3.86474	3.67398
chr4	11199158	11254259	17423228	NM_001159595 // Ints8 // integrator complex subunit 8 // 4 A1|4 // 72656 /// NM_178112	Ints8	NM_001159595	NM_001159595 // RefSeq // Mus musculus integrator complex subunit 8 (Ints8), transcript		8.66903	8.80195	8.56663	8.39188	8.53651	8.69474	8.94435	8.9901	8.88876	8.69213	8.81819	8.80175	8.74472	8.76434	8.45026	8.8114	8.99479	8.44773	8.51769	8.93846	9.1575	9.17071	8.68679	8.93834	9.11864	9.02514	9.09788	8.79178	9.00171	9.19842	9.14128	8.78479	8.68874	8.97028	8.74153	9.27464	8.90795	8.78985	8.83431	8.40186	9.31582
chr4	41194313	41275144	17424163	NM_026872 // Ubap2 // ubiquitin-associated protein 2 // 4 A5|4 // 68926 /// ENSMUST0000	Ubap2	NM_026872	NM_026872 // RefSeq // Mus musculus ubiquitin-associated protein 2 (Ubap2), mRNA. // ch		11.3617	11.0555	11.1297	11.015	11.0951	11.0071	11.1137	11.0139	11.1051	11.053	10.9092	11.2123	11.0618	11.1989	11.1053	11.2502	11.0452	11.2358	10.9268	11.2135	11.1993	11.0129	11.065	11.2764	11.2821	11.211	11.0781	11.0851	10.9366	11.0671	11.0837	11.1023	10.9368	11.1245	11.036	11.2022	11.1817	11.0201	11.1178	11.1761	11.1616
chr4	11261315	11322137	17423265	ENSMUST00000084892 // Dpy19l4 // dpy-19-like 4 (C. elegans) // 4 A1|4 // 381510 /// NM_	Dpy19l4	ENSMUST00000084892	ENSMUST00000084892 // ENSEMBL // cdna:known chromosome:NCBIM37:4:11188462:11249284:-1 g		8.13691	8.68915	8.80423	8.6318	8.5342	8.45852	8.6735	8.84633	8.59308	8.46196	8.69016	8.6057	8.66115	8.6243	8.22755	8.86195	8.69796	8.52521	8.63421	8.60918	8.8084	8.79637	8.53315	8.70899	8.87051	8.64458	8.99938	8.92889	8.79561	9.06494	8.88475	8.97393	8.89106	8.92004	8.83341	8.85055	8.65794	8.49556	8.71511	8.65724	8.78514
chr4	12027505	12040894	17411881	NM_177861 // Tmem67 // transmembrane protein 67 // 4 A1|4 // 329795 /// ENSMUST00000050	Tmem67	NM_177861	NM_177861 // RefSeq // Mus musculus transmembrane protein 67 (Tmem67), mRNA. // chr4 //		3.88607	4.00036	3.7875	4.02581	3.97663	4.17297	3.75876	4.22473	3.60185	4.00734	3.97348	3.56668	4.02359	3.88534	3.94607	3.64768	3.86304	3.71765	3.95945	3.68308	3.91649	3.5931	3.86328	3.80706	3.7324	3.85997	4.00075	3.67511	3.70709	3.72932	4.01625	3.65624	3.84869	3.93511	3.71672	3.94035	4.08389	3.91248	3.89973	4.01314	4.06475
chr4	49632006	49656887	17414068	NM_001163263 // Rnf20 // ring finger protein 20 // 4 B1|4 // 109331 /// ENSMUST00000167	Rnf20	NM_001163263	NM_001163263 // RefSeq // Mus musculus ring finger protein 20 (Rnf20), transcript varia		8.5815	8.58024	8.66681	8.16192	8.28851	8.55422	8.63737	8.66273	8.64428	8.53289	8.40377	8.21838	8.59713	8.5901	8.90851	8.50833	8.50618	8.68616	8.48279	8.49718	8.78899	8.60355	8.35478	8.59297	8.71437	8.75804	8.76011	8.53803	8.56888	8.5586	8.76999	8.69736	8.69495	8.6202	8.24976	8.81604	8.75414	8.5649	8.76653	8.95226	8.76036
chr4	45715169	45716421	17413671	---		---	ENSMUST00000124989 // ENSEMBL // havana:lincRNA chromosome:NCBIM37:4:45728041:45729293:		4.85255	5.03692	5.03353	5.12701	4.96006	5.11599	5.15592	5.42755	5.41821	4.43599	5.26325	5.16404	5.25627	5.01418	5.10336	5.53189	5.04897	5.14188	4.90108	4.81382	5.16118	4.86234	4.98367	5.17039	5.12467	5.33375	5.01589	4.93114	5.30923	5.01294	5.00494	4.83586	4.97772	4.68366	5.02789	5.19391	5.16726	5.11064	4.95612	5.06166	5.07249
chr4	19519252	19570108	17423525	NM_027769 // Cpne3 // copine III // 4 A3|4 // 70568 /// ENSMUST00000029885 // Cpne3 //	Cpne3	NM_027769	NM_027769 // RefSeq // Mus musculus copine III (Cpne3), mRNA. // chr4 // 100 // 85 // 2		8.9587	9.1429	8.96661	9.01702	8.92833	9.1883	9.3628	9.60876	9.99704	8.91047	9.63163	8.70868	8.92354	8.66701	8.88196	9.00909	8.4656	8.51316	9.04361	9.27744	10.0534	9.42979	9.26383	9.88134	9.19005	8.97912	9.15291	9.33374	8.79828	9.96764	9.48003	9.18889	9.13602	9.0796	8.55194	9.59518	8.85132	8.85797	8.79021	8.8556	8.79047
chr4	5545238	5551223	17423047	---		---	AK030024 // GenBank HTC // Mus musculus adult male testis cDNA, RIKEN full-length enric		4.03804	4.12618	3.9426	3.84075	4.27087	3.98048	4.10769	4.3773	4.13057	3.94125	4.08016	4.07685	3.91119	3.9188	4.17164	3.88645	4.20372	4.18415	3.96782	3.94325	3.78006	4.09359	4.26662	3.73643	3.84858	4.00471	4.13466	3.86377	4.02999	4.35482	4.34347	4.27897	4.21102	4.08775	3.93735	3.94478	3.78915	4.08965	4.16192	4.11571	3.94097
chr4	11501456	11502839	17423314	---		---	ENSMUST00000141538 // ENSEMBL // cdna:known chromosome:NCBIM37:4:11428603:11429986:-1 g		5.24515	5.34916	5.24142	5.06989	5.34241	5.62717	5.41254	5.42527	5.41418	5.3588	5.88598	5.2795	5.67349	5.56064	5.05026	5.33792	5.61721	5.32026	5.52446	5.43281	5.39116	5.50474	5.3228	5.05545	5.33683	5.1383	5.4802	5.3793	5.45258	5.42002	5.1253	5.55953	5.36517	5.30438	5.33711	5.35543	5.84076	5.46808	5.55626	5.41396	5.31875
chr4	5632328	5642284	17411568	NR_038183 // 4930423M02Rik // RIKEN cDNA 4930423M02 gene // 4|4 // 73872	4930423M02Rik	NR_038183	NR_038183 // RefSeq // Mus musculus RIKEN cDNA 4930423M02 gene (4930423M02Rik), non-cod		3.3379	3.31441	3.34268	3.01954	3.33224	3.41937	3.45816	3.21032	3.27507	3.22199	3.33185	3.43405	3.32673	3.46498	3.15604	3.3389	3.3949	3.39328	3.37202	3.25779	3.23661	3.31719	3.3665	3.45037	3.44514	3.36143	3.38321	3.21502	3.09008	3.08052	3.3074	3.46628	3.44325	3.39394	3.3415	3.36404	3.50828	3.56686	3.32306	3.1718	3.35802
chr4	51540747	51541015	17414108	---		---	ENSMUST00000157333 // ENSEMBL // ncrna:misc_RNA chromosome:NCBIM37:4:51553619:51553887:		3.29112	3.24747	3.14845	3.42106	2.96272	3.06687	3.211	3.21371	3.3738	3.54614	3.47346	3.07865	3.07	3.2724	3.38896	3.16424	3.18184	3.12914	3.24921	2.85831	3.1004	3.14598	3.13773	2.91363	3.24849	3.04385	3.2938	3.44625	3.22565	3.11628	3.39698	3.17557	2.99314	3.31033	3.36391	3.54794	3.20024	3.18867	3.19672	3.23026	3.06996
chr4	36952966	36988032	17412705	AK081400 // Gm12371 // predicted gene 12371 // 4 A5|4 // 100042132 /// XR_107579 // Gm1	Gm12371	AK081400	AK081400 // GenBank HTC // Mus musculus 16 days embryo head cDNA, RIKEN full-length enr		4.47778	5.02561	4.80681	4.46931	4.4902	4.83565	4.13388	4.61964	4.57689	4.53238	3.99909	4.36949	4.74735	5.34137	5.35819	5.30087	5.10302	4.38216	4.35771	4.1779	4.48475	4.48166	4.11158	4.07982	4.23459	3.88673	4.32848	4.10323	4.37118	4.03024	4.84011	4.72166	5.01378	5.53878	4.61856	5.06179	4.46763	5.20652	4.43171	4.34785	5.07277
chr4	45316613	45342732	17424937	NM_025513 // Exosc3 // exosome component 3 // 4|4 B2 // 66362 /// ENSMUST00000030003 //	Exosc3	NM_025513	NM_025513 // RefSeq // Mus musculus exosome component 3 (Exosc3), mRNA. // chr4 // 100		7.25293	7.55646	7.6408	7.436	7.60608	7.1049	7.66134	7.98313	8.02649	7.65631	7.42643	7.32657	7.25401	7.40801	7.04201	7.29229	7.61922	7.50829	7.66497	7.43611	7.95696	7.6366	7.75557	7.7565	7.57952	7.55001	8.04593	7.65926	7.66097	7.83206	7.59768	7.50001	7.38955	7.62091	7.25562	7.75953	7.80051	7.70772	7.58067	7.72675	7.60524
chr4	41569775	41638158	17412883	NM_175138 // Dnaic1 // dynein, axonemal, intermediate chain 1 // 4 A5|4 // 68922 /// EN	Dnaic1	NM_175138	NM_175138 // RefSeq // Mus musculus dynein, axonemal, intermediate chain 1 (Dnaic1), mR		5.9561	5.89376	5.94296	6.67514	6.06656	6.21007	5.76083	5.88912	5.93584	5.76003	6.08902	6.20822	5.97096	5.94464	6.25712	6.01415	5.89111	5.87583	5.73674	5.8014	5.66413	5.98773	5.94785	5.74723	5.74372	5.78766	5.99296	5.77726	5.88771	6.02387	5.98391	5.94715	5.8721	5.95648	6.37071	6.05885	5.80521	5.76323	5.83969	5.76743	5.64135
chr4	14623620	14796060	17423422	NM_028499 // Lrrc69 // leucine rich repeat containing 69 // 4 A1|4 // 73314 /// ENSMUST	Lrrc69	NM_028499	NM_028499 // RefSeq // Mus musculus leucine rich repeat containing 69 (Lrrc69), mRNA. /		4.03951	4.4346	4.06908	4.16582	4.11413	3.92855	4.20192	4.14049	3.9427	4.03756	4.13312	3.89874	4.42644	3.81449	4.09045	3.56675	4.10442	4.2306	4.00709	3.79148	3.83288	4.09738	3.87058	3.77847	4.0144	4.15535	4.09421	3.90256	4.52724	3.81158	4.12219	4.05848	4.19753	4.00071	4.04019	3.9816	3.94796	4.44434	4.13592	4.12404	3.87157
chr4	43851565	43855463	17413470	NM_019473 // Olfr155 // olfactory receptor 155 // 4 B1|4 // 29845 /// ENSMUST0000009510	Olfr155	NM_019473	NM_019473 // RefSeq // Mus musculus olfactory receptor 155 (Olfr155), mRNA. // chr4 //		3.45212	3.90299	3.65232	4.82889	4.03236	3.97337	3.79817	3.91491	3.95818	4.31611	3.87053	4.0052	3.8433	3.82175	4.28615	4.04541	3.80125	4.19452	3.78852	3.98059	3.90806	3.80898	4.00847	3.8672	3.84946	3.96544	3.85317	3.69519	3.79296	4.16076	4.154	3.86051	3.75391	3.64384	3.71335	3.81802	3.88023	3.64011	3.94893	4.14924	4.1637
chr4	36756048	36756154	17412703	---		---	ENSMUST00000157218 // ENSEMBL // ncrna:snRNA chromosome:NCBIM37:4:36703081:36703187:1 g		2.95475	3.47318	3.1998	2.95077	3.15385	3.42106	3.51877	2.79934	2.99809	3.9548	3.29243	3.31745	3.4719	3.36521	3.10076	3.01335	3.30305	3.31854	3.60547	4.17979	3.18958	3.22758	3.45861	2.8796	3.51942	3.38431	3.8474	3.22421	3.12282	3.25592	3.39963	3.60642	3.79705	3.40374	3.38725	3.93527	3.56165	3.40004	3.07853	3.44985	3.3642
chr4	43583216	43584494	17424762	NM_172866 // Rgp1 // RGP1 retrograde golgi transport homolog (S. cerevisiae) // 4 B1|4	Rgp1	NM_172866	NM_172866 // RefSeq // Mus musculus RGP1 retrograde golgi transport homolog (S. cerevis		4.93471	5.22712	5.32463	5.10675	5.28733	5.66985	5.11389	5.3369	5.01547	5.31374	5.75988	5.12458	5.68443	4.94393	5.23369	4.48979	5.26505	4.92578	5.36315	5.12228	4.88192	5.10985	4.95275	5.30506	4.85409	4.99928	4.97226	5.04293	5.24166	4.77041	5.06998	5.33242	5.34442	5.04931	5.18171	5.1069	5.07892	5.1885	4.87174	5.3025	5.11514
chr4	48663514	48673502	17414032	NM_026509 // Murc // muscle-related coiled-coil protein // 4|4 B2 // 68016 /// ENSMUST0	Murc	NM_026509	NM_026509 // RefSeq // Mus musculus muscle-related coiled-coil protein (Murc), mRNA. //		7.52177	7.36776	6.86489	7.36968	6.8896	6.91409	6.89289	5.09708	5.67193	6.51567	6.77541	6.59872	7.23954	7.41025	6.84925	7.51082	6.9946	7.76623	6.79526	6.37842	5.73269	6.83822	7.14552	6.11724	6.74565	6.98933	6.82845	6.61234	7.00133	6.80581	6.70577	6.87396	7.36131	7.24039	7.10263	7.12071	7.12647	6.8734	6.55505	6.62003	6.91018
chr4	9283972	9287391	17423136	---		---	ENSMUST00000149848 // ENSEMBL // cdna:putative chromosome:NCBIM37:4:9211119:9214538:-1		4.13449	4.26063	4.25875	4.27234	4.27496	4.26215	4.17036	4.21463	4.11389	4.11145	4.34795	4.09512	4.41556	4.12258	4.27964	4.4654	4.19027	4.05827	4.43397	4.04534	4.10994	4.03503	4.31656	3.92887	4.12846	4.16206	4.14101	4.13746	4.19501	4.49903	4.13527	4.03081	4.04661	4.19444	4.22505	3.97198	4.33624	4.01574	4.27234	4.23676	3.83002
chr4	44121893	44124123	17413526	NR_040414 // Gm12504 // prothymosin alpha pseudogene // 4 B1|4 // 623796 /// NR_040414	Gm12504	NR_040414	NR_040414 // RefSeq // Mus musculus predicted pseudogene 12504 (Gm12504), non-coding RN		5.15568	5.10587	5.06262	4.88831	5.1232	5.53544	5.09441	5.10942	5.75235	5.15079	5.33282	5.02408	6.04101	5.13561	4.79745	4.85115	5.25466	5.2048	5.66717	5.03278	6.42954	5.55387	5.47676	5.8299	4.66614	4.88687	5.61849	5.19487	5.25002	6.0646	5.5121	5.34518	5.95101	4.91029	5.41956	5.6503	5.27912	5.16605	5.10082	5.21526	4.98952
chr4	11758147	11817905	17411848	NM_019753 // Cdh17 // cadherin 17 // 4|4 A2 // 12557 /// ENSMUST00000029871 // Cdh17 //	Cdh17	NM_019753	NM_019753 // RefSeq // Mus musculus cadherin 17 (Cdh17), mRNA. // chr4 // 100 // 94 //		4.68258	4.33764	4.48582	4.40727	4.33751	4.26441	4.26384	4.1117	5.08149	4.57884	4.23778	4.29867	4.21915	4.51262	4.52724	4.65746	4.45534	4.03403	4.32089	4.0285	4.97912	4.20336	4.61239	4.4418	4.12732	4.18883	4.09527	4.45161	4.1514	4.38342	4.3288	4.17647	3.96045	4.21901	4.24766	4.24054	4.43668	4.06565	4.3737	4.46194	4.21129
chr4	41303158	41303272	17412858	---		---	ENSMUST00000083939 // ENSEMBL // ncrna:rRNA chromosome:NCBIM37:4:41250191:41250305:1 ge		4.52762	4.71005	4.62594	5.82961	4.9584	4.56132	5.05389	4.762	4.47244	5.10166	4.7026	4.57749	4.67991	4.87085	5.84947	5.1061	4.85518	4.86383	4.34645	4.52613	4.43245	4.54557	4.77686	4.85093	4.68977	5.09331	4.48602	4.55437	4.51615	5.20635	4.27939	4.23388	4.68546	4.34964	4.59355	3.86869	4.82555	4.78837	4.99992	4.76944	5.27795
chr4	21767156	21837872	17412144	NM_152825 // Usp45 // ubiquitin specific petidase 45 // 4 A3|4 // 77593 /// ENSMUST0000	Usp45	NM_152825	NM_152825 // RefSeq // Mus musculus ubiquitin specific petidase 45 (Usp45), mRNA. // ch		7.59787	7.89012	7.11691	7.14802	7.92422	7.63772	8.14003	7.72382	7.93625	8.314	7.2656	7.64842	7.35848	7.34281	8.06144	7.72676	7.68409	8.30787	7.72076	8.12726	7.91873	7.76227	7.89673	8.10777	8.1695	8.40496	8.18282	8.15112	8.33664	8.00646	8.0733	8.12773	7.53858	7.77222	8.01448	8.06428	8.03119	7.87143	8.22448	8.16115	8.06069
chr4	43727198	43728639	17413458	ENSMUST00000095109 // Hrct1 // histidine rich carboxyl terminus 1 // 4 B1|4 // 10003978	Hrct1	ENSMUST00000095109	ENSMUST00000095109 // ENSEMBL // cdna:known chromosome:NCBIM37:4:43740070:43741511:1 ge		6.72556	6.96195	6.74173	6.97192	7.14204	6.84395	6.91764	6.80704	6.52741	6.62906	6.89497	6.83477	6.64404	6.79447	6.9121	6.71327	6.8717	7.11097	6.92747	6.91886	6.61994	6.88831	7.07743	6.68938	6.7091	6.73533	6.88705	6.74983	6.71878	6.76716	7.12778	7.02211	7.05072	6.91617	7.15114	6.56708	7.02918	6.83841	6.71361	7.13481	6.62592
chr4	6634164	6634295	17423105	---		---	ENSMUST00000104114 // ENSEMBL // ncrna:snoRNA chromosome:NCBIM37:4:6561311:6561442:-1 g		4.89215	4.6876	4.96293	5.16792	5.00348	4.71648	5.02319	4.75074	4.83725	4.9587	4.72142	4.86188	4.82394	5.164	4.14656	4.82835	5.23183	5.00999	5.36791	5.04059	5.07061	4.68513	5.1301	5.10618	4.76072	4.8297	5.4744	5.1927	4.39102	5.18013	5.00123	5.25002	4.86234	4.58168	5.35964	4.97306	5.50125	4.7971	5.10126	5.15847	5.4736
chr4	34962220	34966965	17412689	---		---	ENSMUST00000144419 // ENSEMBL // cdna:known chromosome:NCBIM37:4:34909469:34914214:1 ge		4.50539	4.53224	4.61182	5.0874	4.60838	4.67475	4.56422	4.47946	4.72339	4.81674	4.727	4.55746	4.66515	4.49362	4.60269	4.90369	4.60072	4.84426	4.5912	4.56156	4.60555	4.45347	4.55809	4.32635	4.49911	4.86205	4.39308	4.58527	4.39954	4.66835	4.71653	4.87153	4.76748	4.52765	4.60385	4.31946	5.0145	4.42881	4.68873	4.54953	4.71058
chr4	44967769	44971096	17413570	---		---	ENSMUST00000150111 // ENSEMBL // cdna:known chromosome:NCBIM37:4:44980641:44983968:1 ge		4.01191	4.05602	4.19868	3.82893	4.05062	4.16778	4.06711	4.22857	4.15697	3.93706	4.44406	3.87876	4.11437	4.10855	4.28445	4.0231	4.03461	4.10039	4.00618	4.13775	4.11771	4.17615	4.10759	3.91054	3.90236	3.98125	4.19681	4.05875	4.15574	4.26624	3.9526	4.37897	4.13436	4.09342	4.13257	4.18305	4.24061	4.19649	4.10542	4.20035	3.84246
chr4	43446462	43454628	17424608	NM_001110320 // Cd72 // CD72 antigen // 4 B1|4 22.5 cM // 12517 /// NM_007654 // Cd72 /	Cd72	NM_001110320	NM_001110320 // RefSeq // Mus musculus CD72 antigen (Cd72), transcript variant 1, mRNA.		6.65745	6.39732	6.67143	7.43816	8.18207	6.37812	6.20657	6.74886	7.12759	6.34527	6.36696	7.82567	7.35864	7.34021	5.47849	7.12867	6.91649	8.02182	6.94487	8.9655	7.20159	6.11551	6.10308	7.09579	6.34931	6.56272	7.9429	6.4399	6.65534	6.97269	8.2655	7.20667	7.32906	7.85156	6.65683	6.99066	7.43002	6.54726	6.18257	5.88657	6.24445
chr4	43002337	43010506	17424515	ENSMUST00000030165 // Fancg // Fanconi anemia, complementation group G // 4|4 B1 // 605	Fancg	ENSMUST00000030165	ENSMUST00000030165 // ENSEMBL // cdna:known chromosome:NCBIM37:4:43015215:43023227:-1 g		8.63794	8.76448	8.75087	8.2938	8.3042	8.64296	8.70311	7.78286	8.47794	8.47955	8.57219	8.25378	7.74396	9.03827	8.03067	9.17717	8.57204	8.09305	7.76111	8.91058	8.81575	8.09112	7.91937	8.75873	9.29577	8.4468	8.16055	8.49271	8.99704	8.22766	8.63043	8.43344	8.33448	8.94109	8.67632	8.73063	8.19172	8.88029	8.12587	8.57255	9.21868
chr4	26368406	26370277	17423724	---		---	ENSMUST00000084767 // ENSEMBL // cdna:known chromosome:NCBIM37:4:26295553:26297424:-1 g		4.83829	5.0028	4.78596	5.05508	4.81249	5.24996	4.79114	4.78568	4.94441	4.8981	5.2118	5.26329	4.76276	4.6829	5.41541	5.30805	4.57294	5.113	4.78468	4.58717	4.8965	4.9712	4.78767	4.84376	5.18648	4.90466	4.65677	4.81612	4.67819	5.07279	4.77176	4.60617	4.96667	4.66853	5.11093	4.21673	4.69063	4.65799	4.69795	4.86915	4.56016
chr4	39259631	39259794	17423972	---		---	ENSMUST00000083410 // ENSEMBL // ncrna:snRNA chromosome:NCBIM37:4:39206664:39206827:-1		6.10849	5.83127	5.67322	6.32482	5.91538	5.43604	5.84783	5.65871	5.55698	6.75771	6.27603	6.06319	6.22366	5.79718	5.75326	6.30903	5.63244	5.72577	5.33504	5.96263	6.18351	6.04398	6.10883	5.65305	5.9998	6.00649	6.58675	5.82767	5.54757	5.96219	5.97108	6.02667	6.20985	5.97055	6.17514	5.65154	5.72523	5.74765	5.94389	5.86629	5.80613
chr4	45890303	45950774	17413706	NM_198660 // E230008N13Rik // RIKEN cDNA E230008N13 gene // 4 B1|4 // 381522	E230008N13Rik	NM_198660	NM_198660 // RefSeq // Mus musculus RIKEN cDNA E230008N13 gene (E230008N13Rik), mRNA. /		5.2192	5.04389	5.20565	5.57473	5.15716	5.37403	5.29316	5.30053	4.82726	4.88202	5.58807	4.9833	5.30642	5.32012	5.62741	5.25261	5.02828	5.36075	5.00861	5.27809	5.25587	5.27489	5.18488	5.3261	5.16606	5.1069	5.12333	5.04227	5.09588	5.19796	5.15477	5.33804	5.17935	5.22584	5.36129	5.10829	5.20179	5.3165	5.13938	5.18307	5.14216
chr4	35706647	36951747	17423939	NM_001165999 // Lingo2 // leucine rich repeat and Ig domain containing 2 // 4 A5|4 // 2	Lingo2	NM_001165999	NM_001165999 // RefSeq // Mus musculus leucine rich repeat and Ig domain containing 2 (		7.22688	7.77474	7.42501	7.03146	7.49171	7.78315	7.45553	5.51175	5.34875	6.55868	6.23273	7.32423	7.93904	8.57912	8.03846	7.82932	8.51786	7.35729	7.12236	6.62408	5.29816	7.39581	5.18809	5.01167	7.26493	5.26613	7.04614	5.67743	6.01506	5.56836	7.88619	7.80943	8.15553	8.19065	7.45729	8.05292	6.46061	8.09368	5.63538	5.95394	7.9943
chr4	11928424	11928739	17411869	---		---	ENSMUST00000122569 // ENSEMBL // ncrna:misc_RNA chromosome:NCBIM37:4:11855571:11855886:		3.72768	4.07752	3.68899	3.96686	3.52501	3.68804	3.55833	4.03034	3.50625	3.55912	3.80738	3.46219	3.63902	3.66885	3.84939	3.83467	3.78072	3.73412	3.81907	3.5622	3.43023	3.82027	4.08821	3.68912	3.82796	3.64095	4.15141	3.36448	3.70202	3.52994	3.46854	3.64196	3.97047	3.75109	3.6918	3.86755	3.78485	3.95421	3.66564	3.83671	3.60445
chr4	42158116	42168604	17424389	NM_010550 // Il11ra2 // interleukin 11 receptor, alpha chain 2 // 4 A5|4 12.7 cM // 161	Il11ra2	NM_010550	NM_010550 // RefSeq // Mus musculus interleukin 11 receptor, alpha chain 2 (Il11ra2), m		7.31904	6.83007	6.93842	7.23127	7.31969	7.17876	7.06257	7.77178	7.3879	6.7605	7.38464	6.92114	7.52849	6.80825	6.90117	6.53323	6.74573	7.22757	7.48437	7.09341	7.15782	7.06371	7.08837	7.13377	6.48495	6.83445	6.79426	7.06641	6.77557	7.32605	6.70718	7.08238	7.46021	6.82803	6.90296	6.52132	6.81921	6.87888	6.5107	6.93247	6.67802
chr4	42655275	42665763	17424431	NM_010550 // Il11ra2 // interleukin 11 receptor, alpha chain 2 // 4 A5|4 12.7 cM // 161	Il11ra2	NM_010550	NM_010550 // RefSeq // Mus musculus interleukin 11 receptor, alpha chain 2 (Il11ra2), m		7.31904	6.83007	6.93842	7.23127	7.31969	7.17876	7.06257	7.77178	7.3879	6.7605	7.38464	6.92114	7.52849	6.80825	6.90117	6.53323	6.74573	7.22757	7.48437	7.09341	7.15782	7.06371	7.08837	7.13377	6.48495	6.83445	6.79426	7.06641	6.77557	7.32605	6.70718	7.08238	7.46021	6.82803	6.90296	6.52132	6.81921	6.87888	6.5107	6.93247	6.67802
chr4	9431961	9447199	17423141	---		---	ENSMUST00000155578 // ENSEMBL // cdna:known chromosome:NCBIM37:4:9359108:9374346:-1 gen		3.55851	3.70765	3.73579	4.14418	3.70486	4.07081	3.74104	3.97862	3.47992	3.82981	3.86699	3.91355	3.78764	4.04882	3.86818	3.89761	3.94063	4.02416	3.68066	4.06988	3.73638	3.59624	4.1614	3.89977	3.6012	3.59214	3.95352	3.6744	3.89959	3.58558	3.84566	4.04816	3.91181	3.88569	3.83591	3.56995	4.03502	3.99915	3.90131	3.94031	3.68695
chr4	25940365	25940470	17412292	---		---	ENSMUST00000157922 // ENSEMBL // ncrna:snRNA chromosome:NCBIM37:4:25867512:25867617:1 g		4.41547	4.92886	4.55179	5.21923	4.53642	4.97252	4.51918	4.7509	4.42971	4.86583	4.79092	4.34336	4.87621	4.73966	4.84507	4.75763	4.73127	4.84646	4.64183	4.7102	4.71429	4.69487	4.82887	4.69455	4.75377	4.5481	4.87364	4.71528	4.72489	4.80812	4.64289	4.86345	4.46977	4.62351	5.00601	4.26947	5.07315	4.71044	4.7477	4.71019	4.78349
chr4	35225204	35262222	17412696	ENSMUST00000130538 // 3110043O21Rik // RIKEN cDNA 3110043O21 gene // 4 A5|4 // 73205	3110043O21Rik	ENSMUST00000130538	ENSMUST00000130538 // ENSEMBL // cdna:known chromosome:NCBIM37:4:35165658:35173372:-1 g		3.72654	3.90158	3.69279	4.20328	3.60253	3.97653	3.87898	3.98837	3.8124	3.49498	4.04888	3.93678	4.03932	4.25989	3.96362	3.9847	3.87746	3.93742	3.83703	3.65898	3.55493	3.69369	3.89432	3.83508	3.9012	3.76572	3.70429	3.62657	3.92433	3.92759	3.67102	3.85857	3.85641	3.68532	3.95955	4.02256	4.17169	3.82252	3.98128	3.86098	4.07912
chr4	9844372	9862345	17411727	NM_013526 // Gdf6 // growth differentiation factor 6 // 4 A1|4 // 242316 /// ENSMUST000	Gdf6	NM_013526	NM_013526 // RefSeq // Mus musculus growth differentiation factor 6 (Gdf6), mRNA. // ch		4.96196	4.71697	4.9202	4.35009	5.07984	4.78753	4.7874	4.68036	5.47912	4.95863	4.59378	4.73187	4.57365	4.52806	4.73832	4.63738	4.65206	4.67064	4.69303	4.82634	4.64547	4.75026	4.7907	4.54608	4.70301	4.82315	4.73705	4.43476	4.50521	4.75621	4.65037	4.81191	4.95566	4.77612	4.6918	4.90446	4.63258	4.79688	4.87185	4.77202	4.53031
chr4	14502430	14621805	17423395	ENSMUST00000042221 // Slc26a7 // solute carrier family 26, member 7 // 4 A1|4 // 208890	Slc26a7	ENSMUST00000042221	ENSMUST00000042221 // ENSEMBL // cdna:known chromosome:NCBIM37:4:14429577:14548952:-1 g		4.96848	5.58749	4.78145	5.77267	5.1785	4.67599	4.84923	4.68653	4.84321	5.02315	4.52421	4.68432	5.40167	4.86199	5.05053	4.44577	4.54494	5.03671	5.53809	4.25881	4.33671	5.0268	4.33506	4.34211	4.71455	4.78794	4.90089	4.9752	4.60752	5.06063	5.74624	4.66139	5.08609	5.05251	4.77841	4.65038	5.24123	4.77124	4.77569	4.91078	4.59152
chr4	52970623	52971567	17414159	ENSMUST00000095084 // Olfr270 // olfactory receptor 270 // 4 B2-C2|4 // 258600 /// ENSM	Olfr270	ENSMUST00000095084	ENSMUST00000095084 // ENSEMBL // cdna:known chromosome:NCBIM37:4:52983495:52984439:1 ge		3.21215	3.1839	3.11719	4.68977	3.27977	2.99037	3.07889	3.51325	3.16403	3.46412	3.2404	3.12752	3.49057	3.02981	3.0008	3.29707	3.38652	3.43037	3.19919	3.17048	3.149	3.76667	3.0973	3.19848	3.27679	3.36538	3.62402	2.87291	3.42599	3.634	3.33352	3.08851	3.37394	3.13429	3.26442	3.01848	3.49253	3.25765	3.17813	3.55374	3.43169
chr4	48898593	48963237	17414040	---		---	AK048554 // GenBank HTC // Mus musculus 16 days embryo head cDNA, RIKEN full-length enr		4.21168	4.10247	4.29457	4.16524	4.30134	4.28129	3.95461	4.33508	4.0158	4.40996	4.48733	4.30229	4.38655	4.26823	4.13419	4.245	4.22402	4.33302	4.37689	4.35613	4.53166	4.17127	4.33208	3.91214	4.36212	4.54423	4.15093	4.10746	4.19625	4.25996	4.16641	4.63408	4.26224	4.20111	4.42011	4.2136	4.21137	4.06898	4.16539	4.22281	4.19162
chr4	30432112	30523783	17412330	AK076999 // Lasc1 // uncharacterized protein 4931422A14 // 4 A5|4 // 329814 /// AK07699	Lasc1	AK076999	AK076999 // GenBank HTC // Mus musculus adult male testis cDNA, RIKEN full-length enric		5.43119	5.34034	5.58036	5.48968	5.53931	5.20301	5.5916	5.47559	5.23209	5.77946	5.55668	5.4027	5.46109	5.26913	5.13792	5.03219	5.37691	5.34151	5.06631	5.47048	5.21209	5.27089	5.1225	5.10303	5.38352	5.50585	5.23167	5.31639	5.15125	5.14784	5.21344	5.50715	5.69847	5.5504	5.36359	5.27835	5.29019	5.42337	5.02989	5.5194	5.04364
chr4	25566660	25566822	17423699	---		---	ENSMUST00000083106 // ENSEMBL // ncrna:snRNA chromosome:NCBIM37:4:25493807:25493969:-1		3.29012	3.04984	3.3142	3.63995	3.48574	3.40302	3.31884	3.41917	3.28392	3.33897	3.75271	3.48882	3.2547	3.33851	2.99925	3.39935	3.34169	3.24806	3.18261	3.18216	3.55514	3.16796	3.40824	3.38274	3.42158	3.22594	3.3585	3.40076	3.17124	3.44229	3.34001	3.20058	3.56935	3.34412	3.55397	3.41386	3.52242	3.35521	3.38166	3.56472	3.17993
chr4	46343609	46346412	17413817	ENSMUST00000095097 // Foxe1 // forkhead box E1 // 4 B1|4 21.5 cM // 110805 /// NM_18329	Foxe1	ENSMUST00000095097	ENSMUST00000095097 // ENSEMBL // cdna:known chromosome:NCBIM37:4:46356481:46359284:1 ge		6.24936	6.23195	6.24419	6.67236	6.25951	6.62992	6.15214	6.24993	6.21377	6.30729	6.45249	6.33204	6.43087	6.10673	6.39976	6.22438	6.36297	6.29584	6.2259	6.40916	6.30598	6.29256	5.97363	6.03041	6.07845	6.37658	6.18495	6.0023	6.31305	6.06257	6.39984	6.27976	5.99314	6.29088	6.2965	6.31066	6.58428	6.21399	6.2459	6.25613	6.34465
chr4	52814604	52828269	17414152	NM_146858 // Olfr275 // olfactory receptor 275 // 4 B2-C2|4 // 258857 /// ENSMUST000000	Olfr275	NM_146858	NM_146858 // RefSeq // Mus musculus olfactory receptor 275 (Olfr275), mRNA. // chr4 //		4.42983	4.27919	4.46579	4.2446	4.55823	4.71229	4.50777	4.29115	4.37315	4.18489	4.95501	4.26274	4.56858	4.48289	4.62454	4.31158	4.23368	4.60721	4.45828	4.47473	4.22963	4.45638	4.29763	4.31228	4.33639	4.06209	4.39216	4.53356	4.45053	4.39013	4.73579	4.49388	4.34737	4.20967	4.41956	4.31482	4.65336	4.18232	4.35329	4.226	4.42391
chr4	40472180	40477168	17412767	ENSMUST00000049655 // Tmem215 // transmembrane protein 215 // 4 A5|4 // 320500 /// NM_1	Tmem215	ENSMUST00000049655	ENSMUST00000049655 // ENSEMBL // cdna:known chromosome:NCBIM37:4:40419213:40424201:1 ge		5.02098	4.98597	5.20553	4.92768	5.28542	4.99495	5.01653	5.32798	4.6921	4.88558	4.98445	4.97591	5.0905	4.85114	5.13652	4.78686	5.15213	5.08594	5.20104	5.18399	5.36836	4.85928	5.34241	5.01789	5.01153	4.6853	4.94494	4.93873	4.58733	4.78313	5.05304	5.00899	5.1741	5.12148	5.40968	4.78188	5.46553	4.79678	4.96294	5.10681	4.77774
chr4	11321944	11342953	17411779	---		---	AK133116 // GenBank HTC // Mus musculus adult male testis cDNA, RIKEN full-length enric		3.93147	4.4182	4.04844	3.95107	3.97618	4.20673	4.0431	4.23408	4.08047	4.27926	4.47709	3.98218	4.15148	4.17416	3.98197	3.91513	4.31692	4.23381	4.26962	3.99261	4.36782	4.10957	4.26812	3.98086	3.88991	3.73976	4.05131	3.8701	3.81909	4.1709	3.90568	4.25146	4.02899	4.11087	4.38741	4.33916	4.43368	4.32466	4.12988	4.1571	3.92007
chr4	15911567	15911634	17423461	---		---	ENSMUST00000157430 // ENSEMBL // ncrna:snoRNA chromosome:NCBIM37:4:15838714:15838781:-1		7.65289	8.06113	7.66811	7.20228	8.27064	8.37018	7.77792	7.77225	7.55037	7.97909	8.50669	7.53902	8.41279	7.84847	8.43088	7.45063	7.7935	8.49166	8.24235	8.00397	7.59634	7.94333	8.30317	7.45291	7.56942	7.71649	8.22489	7.56685	7.7646	7.49152	7.99786	8.19235	8.1657	7.52362	8.51678	7.94811	8.60412	7.63083	8.19149	8.32525	7.84956
chr4	9920990	9927832	17423191	U15647 // Naip3 // NLR family, apoptosis inhibitory protein 3 // 13 D1|13 54.0 cM // 66	Naip3	U15647	U15647 // GenBank // Mus musculus (ORF 1) and reverse transcriptase (ORF 2) genes, comp		3.71873	3.70898	3.7442	3.4902	3.67944	3.7004	3.69333	3.80135	3.96668	3.89015	3.9202	3.7566	3.577	3.70302	4.09209	3.59955	4.03769	3.60591	3.70834	3.46041	3.93407	3.98738	3.95348	3.59841	3.70358	3.9485	3.63759	3.72331	3.73586	3.63389	3.66723	4.08141	3.6445	3.33101	3.73326	3.83697	4.10499	3.7892	3.92881	3.8952	3.82417
chr4	5687677	5687802	17423049	---		---	ENSMUST00000104204 // ENSEMBL // ncrna:snoRNA chromosome:NCBIM37:4:5614824:5614949:-1 g		4.52112	4.21041	4.31943	3.92505	4.45559	4.72057	3.95343	4.20038	4.46731	4.13099	4.45558	4.4555	4.22859	4.62479	4.64121	3.78396	4.54077	4.89215	5.01425	4.17149	4.88259	4.88744	4.85409	4.64417	4.39268	4.35727	4.9353	4.90833	4.88115	4.13799	3.98337	4.4636	4.32701	4.61859	4.48232	3.97316	4.98578	4.00582	4.77944	4.73587	4.95429
chr4	43659622	43669141	17424792	BC119804 // 4930412F15Rik // RIKEN cDNA 4930412F15 gene // 4 B1|4 // 242408 /// ENSMUST	4930412F15Rik	BC119804	BC119804 // GenBank // Mus musculus RIKEN cDNA 4930412F15 gene, mRNA (cDNA clone MGC:14		5.02049	5.14952	5.10316	5.26759	4.73959	5.08984	4.99251	5.13958	4.73992	4.8529	4.75301	5.25085	5.09274	4.90631	5.68755	5.27085	4.97943	5.24443	5.3374	4.78462	4.67001	5.02215	5.40644	4.91323	5.18038	5.40424	5.39087	4.92427	5.12523	5.00719	5.01731	5.55594	5.10314	4.83662	5.17476	5.09703	5.34753	4.83845	5.34642	5.10142	5.32673
chr4	32596960	32602760	17423750	ENSMUST00000056517 // Gja10 // gap junction protein, alpha 10 // 4 A5|4 16.1 cM // 1461	Gja10	ENSMUST00000056517	ENSMUST00000056517 // ENSEMBL // cdna:known chromosome:NCBIM37:4:32687619:32689735:-1 g		3.22655	3.37363	3.4851	3.49378	3.25681	3.29862	3.2498	3.07378	3.13433	3.42708	3.36096	3.16312	3.33415	3.24782	3.47344	3.24446	3.36985	3.20849	3.15152	3.13601	3.46967	3.2559	3.17021	2.99912	3.17786	3.14476	3.45961	3.32355	3.38981	3.05685	3.26966	3.39818	3.36872	3.2878	3.0384	3.29036	3.13863	3.26342	3.18071	3.36502	3.54502
chr4	7820916	7821047	17411633	---		---	ENSMUST00000158542 // ENSEMBL // ncrna:snoRNA chromosome:NCBIM37:4:7748063:7748194:1 ge		3.57697	3.39542	3.77794	4.31668	3.22122	3.37442	3.60072	3.30413	3.25644	3.50147	3.56948	3.03551	3.54202	3.59181	2.95814	3.63898	3.51482	3.25113	3.11946	3.25863	3.0693	3.11252	3.19005	3.3418	3.27762	3.43107	3.42476	3.40874	3.4295	3.36886	3.22676	3.92083	3.14794	3.66372	3.23185	3.3501	3.22108	3.46661	3.32228	2.96183	3.56924
chr4	32800253	32802268	17412534	NM_175364 // Lyrm2 // LYR motif containing 2 // 4 A5|4 // 108755 /// ENSMUST00000062802	Lyrm2	NM_175364	NM_175364 // RefSeq // Mus musculus LYR motif containing 2 (Lyrm2), mRNA. // chr4 // 10		8.73629	8.78587	9.15141	8.56427	8.40535	8.44157	8.8735	8.30003	8.5884	8.24476	8.56863	9.06621	8.47913	9.11195	8.52146	9.02415	9.04087	8.22156	8.57194	8.52634	8.94912	8.83324	8.27789	8.7558	9.1137	8.6926	9.19792	8.72661	9.034	8.54231	9.18296	8.74472	8.76475	9.02094	8.3158	8.89181	8.92667	9.28958	9.2158	8.61015	8.86986
chr4	41712033	41713534	17424293	NM_027278 // 2810432D09Rik // RIKEN cDNA 2810432D09 gene // 4 B1|4 // 69961 /// ENSMUST	2810432D09Rik	NM_027278	NM_027278 // RefSeq // Mus musculus RIKEN cDNA 2810432D09 gene (2810432D09Rik), mRNA. /		7.64786	7.71901	7.75947	8.05431	7.43074	7.83033	7.36811	7.36278	7.33489	7.72324	7.88301	7.46279	7.93538	7.70677	7.84854	7.6867	7.68695	7.34325	7.54371	7.91161	7.21659	7.75457	6.9496	7.68825	7.69908	7.71675	7.63342	7.32742	7.92008	7.24907	7.66893	7.27871	7.53708	7.52307	7.27929	7.79579	7.1495	7.95046	7.57326	7.44873	7.51086
chr4	44607491	44607568	17424902	NR_039580 // Mir5120 // microRNA 5120 // 4|4 23.56 cM // 100628590 /// NR_039580 // Mir	Mir5120	NR_039580	NR_039580 // RefSeq // Mus musculus microRNA 5120 (Mir5120), microRNA. // chr4 // 100 /		6.31301	6.77597	6.60624	5.64042	6.17146	6.35254	6.21675	6.55922	6.38697	6.06419	7.09158	6.33116	6.57942	6.81432	6.23794	5.97639	6.72014	6.29848	5.88242	6.60816	6.18626	6.55322	6.98128	5.94622	6.72394	6.06967	6.99442	6.33302	6.36825	6.01375	6.5902	6.58105	6.46763	6.63883	6.24438	6.50142	6.01567	6.01739	6.52641	6.62284	6.11414
chr4	45018583	45036565	17413591	ENSMUST00000133157 // Polr1e // polymerase (RNA) I polypeptide E // 4|4 B2 // 64424 ///	Polr1e	ENSMUST00000133157	ENSMUST00000133157 // ENSEMBL // cdna:known chromosome:NCBIM37:4:45031455:45046564:1 ge		6.66409	6.77421	6.68051	6.62263	6.51253	6.43058	6.85709	6.25111	6.76512	7.07073	6.54929	6.65113	6.62966	6.81095	6.84711	6.9362	6.94633	6.74429	6.61891	6.83786	6.66761	6.74223	6.62128	6.88323	6.93165	6.73185	6.89665	6.56005	7.00127	6.4511	6.87443	6.27165	6.76544	6.6585	6.61829	6.98157	6.79872	6.50961	7.11515	6.53895	6.47325
chr4	9770585	9823411	17411716	NR_030693 // 4930412C18Rik // RIKEN cDNA 4930412C18 gene // 4 A1|4 // 320152	4930412C18Rik	NR_030693	NR_030693 // RefSeq // Mus musculus RIKEN cDNA 4930412C18 gene (4930412C18Rik), non-cod		5.64801	5.54784	5.7777	5.75008	5.89113	5.85555	5.95606	6.2431	6.17449	5.77665	5.93664	5.97863	5.74888	5.71376	5.54476	5.83068	6.02203	5.68939	5.77947	5.79596	6.50344	5.5766	5.82761	6.09703	5.63342	6.0063	5.79427	5.86278	5.74072	6.16984	5.56556	5.35631	5.86645	5.46371	5.73937	5.52848	5.76913	5.61542	5.90546	5.77391	5.84257
chr4	41638144	41640324	17424276	NM_027147 // Enho // energy homeostasis associated // 4 A5|4 // 69638 /// BC021944 // E	Enho	NM_027147	NM_027147 // RefSeq // Mus musculus energy homeostasis associated (Enho), mRNA. // chr4		7.61452	7.44699	7.39967	7.45009	7.31969	7.62778	7.24199	7.30604	6.92216	7.39309	7.50773	7.29987	7.58337	7.42095	7.70728	7.6843	7.44197	7.56841	7.64352	7.37963	7.17876	7.63848	7.26052	7.18915	7.34543	7.23823	7.05317	7.36436	7.14003	7.1791	7.70632	7.29559	7.80391	7.18197	7.71262	7.58734	7.184	7.58605	7.51827	7.46543	7.49605
chr4	19280850	19510623	17412047	NM_013927 // Cngb3 // cyclic nucleotide gated channel beta 3 // 4 A3|4 // 30952 /// ENS	Cngb3	NM_013927	NM_013927 // RefSeq // Mus musculus cyclic nucleotide gated channel beta 3 (Cngb3), mRN		4.15194	4.30145	4.31775	4.45457	4.32597	4.29939	4.31775	4.33702	4.60454	4.52699	4.25583	4.54019	4.17981	4.33292	4.619	4.51111	4.20701	4.44262	4.30371	4.28266	4.19599	4.39937	4.37433	4.37837	4.23246	4.22359	4.33257	4.32853	4.42856	4.46347	4.35269	4.19114	4.24279	4.14479	4.29029	4.26794	4.38798	4.32814	4.5019	4.28331	4.15221
chr4	48279760	48431954	17413978	NM_010569 // Invs // inversin // 4 B|4 16.6 cM // 16348 /// ENSMUST00000030029 // Invs	Invs	NM_010569	NM_010569 // RefSeq // Mus musculus inversin (Invs), mRNA. // chr4 // 100 // 73 // 16 /		6.90336	6.55476	6.75554	6.63842	6.89808	6.98575	6.98633	7.54715	7.74209	6.31269	6.82385	6.93265	6.58328	6.59766	7.22616	6.90653	6.56514	6.74859	6.47224	6.7802	7.40065	7.17913	6.7816	7.28681	7.07674	6.96513	6.55454	6.68161	6.71043	7.5441	6.91699	6.48061	6.81732	6.62089	6.57189	6.91856	6.71561	6.36918	6.23273	6.39523	6.9705
chr4	34893779	34907374	17412681	NM_009889 // Cga // glycoprotein hormones, alpha subunit // 4 A5|4 10.5 cM // 12640 ///	Cga	NM_009889	NM_009889 // RefSeq // Mus musculus glycoprotein hormones, alpha subunit (Cga), mRNA. /		4.94674	4.75088	5.19683	4.84864	5.05963	4.87956	4.80978	5.17884	5.15141	4.75506	5.20369	4.97341	4.84864	4.94931	4.65121	4.85158	4.65106	4.84921	4.94145	4.67658	4.75798	5.14845	4.79405	4.72982	4.88476	4.81782	5.03057	4.63883	4.99735	4.95974	5.05779	5.23676	4.89159	4.91333	5.0688	5.14745	4.95961	4.91753	4.74119	4.87886	5.0734
chr4	43562332	43567060	17413369	ENSMUST00000102944 // Creb3 // cAMP responsive element binding protein 3 // 4 B1|4 20.5	Creb3	ENSMUST00000102944	ENSMUST00000102944 // ENSEMBL // cdna:known chromosome:NCBIM37:4:43575204:43579932:1 ge		8.64471	8.5306	8.57555	8.52767	8.26384	8.61601	8.58081	8.99564	8.77912	8.6586	8.47727	8.39797	8.40164	8.18112	8.41314	8.7943	8.40764	8.44212	8.57702	8.69274	8.84063	8.42562	8.46676	8.80156	8.68049	8.8065	8.30626	8.29212	8.39531	8.7117	8.47194	8.27843	8.55743	8.55676	8.28972	8.55876	8.4028	8.55313	8.55177	8.71369	8.88074
chr4	43834752	43836517	17424818	NM_019475 // Olfr157 // olfactory receptor 157 // 4 B1|4 // 100040268 /// ENSMUST000000	Olfr157	NM_019475	NM_019475 // RefSeq // Mus musculus olfactory receptor 157 (Olfr157), mRNA. // chr4 //		3.91896	4.1493	3.91275	3.91585	4.32046	4.23616	3.98127	4.25457	4.2388	4.33494	4.00533	4.00923	4.08154	3.84523	3.97778	4.16352	3.96134	4.16944	3.7763	4.0532	3.75947	4.0466	4.02061	3.76527	4.09765	4.16704	4.03856	3.86509	4.06889	3.94079	4.09571	3.99595	4.51828	3.82552	4.51968	3.82214	4.21361	3.95173	4.31164	4.29131	3.74601
chr4	20343706	20347818	17412115	---		---	ENSMUST00000141819 // ENSEMBL // cdna:known chromosome:NCBIM37:4:20270853:20274965:1 ge		4.76684	4.73875	5.13222	5.16147	4.75334	4.87894	4.74117	5.11198	4.75888	4.38594	4.81058	4.83085	5.3857	4.91964	5.30508	4.55821	4.98582	4.84662	4.88374	4.82286	4.75119	4.84785	4.94159	4.61211	4.67526	4.80417	4.85353	4.87232	4.659	4.8021	4.72949	4.77513	4.98947	4.45287	5.03911	4.7458	4.41983	4.80453	4.66303	4.97888	4.48901
chr4	15957925	15992589	17411981	ENSMUST00000029879 // Nbn // nibrin // 4|4 A // 27354 /// NM_013752 // Nbn // nibrin //	Nbn	ENSMUST00000029879	ENSMUST00000029879 // ENSEMBL // cdna:known chromosome:NCBIM37:4:15885072:15919736:1 ge		8.03549	8.01471	8.28139	8.09333	8.16959	8.34853	8.2999	8.44352	8.81294	8.34278	8.49004	8.21396	8.36219	8.41113	8.59005	8.27533	8.34165	7.85056	8.20077	8.4508	8.9666	8.40722	8.06314	8.79591	8.41998	8.14109	8.32815	8.21257	8.51186	8.75549	8.38844	8.42099	7.91621	8.33867	7.75338	8.46663	8.30145	8.18072	8.71429	8.14309	8.44987
chr4	41699989	41769474	17412913	NM_001172054 // Il11ra1 // interleukin 11 receptor, alpha chain 1 // 4 A5|4 12.7 cM //	Il11ra1	NM_001172054	NM_001172054 // RefSeq // Mus musculus interleukin 11 receptor, alpha chain 1 (Il11ra1)		7.17763	7.44396	7.4526	6.62616	7.32057	7.45034	7.20141	7.76988	7.27028	7.37114	7.61621	7.19786	7.37319	7.39731	6.74288	7.26497	7.31482	7.04779	7.37389	7.48577	7.33114	7.31646	7.39251	6.94586	7.18104	7.26027	6.6488	7.42868	7.40951	7.12515	7.01465	6.97201	7.51794	7.14669	7.32889	6.79843	7.3976	7.16216	7.04039	7.10178	7.44537
chr4	39398045	39450249	17423974	---		---	ENSMUST00000169881 // ENSEMBL // cdna:known chromosome:NCBIM37:4:39345078:39397282:-1 g		4.31111	4.64847	4.35313	4.76378	4.44202	4.62406	4.59306	4.70536	4.4286	4.15819	4.82728	4.40337	4.68103	4.40959	4.33859	4.37837	4.57232	4.59875	4.74142	4.59686	4.55398	4.30201	4.31613	4.32218	4.30184	4.5365	4.15168	4.44416	4.26002	4.51025	4.5942	4.74971	4.61333	4.51525	4.58022	4.42357	4.81188	4.45482	4.36731	4.74451	4.6866
chr4	43651335	43653594	17424771	ENSMUST00000107870 // Spag8 // sperm associated antigen 8 // 4 B1|4 // 433700 /// NM_00	Spag8	ENSMUST00000107870	ENSMUST00000107870 // ENSEMBL // cdna:known chromosome:NCBIM37:4:43664548:43666466:-1 g		5.67978	5.38629	5.66088	4.96704	5.40501	5.41209	5.46361	5.57547	5.54672	5.68922	5.50162	5.20302	5.24774	5.56467	4.90955	5.21798	5.49649	5.31856	5.53932	5.2771	5.32285	5.42117	5.30572	5.0991	5.39656	5.45191	5.44964	5.1658	5.71864	5.25829	5.25813	5.79751	5.22505	5.70925	5.10865	5.36725	5.77494	5.47973	5.44268	5.60925	5.18227
chr4	46393989	46413506	17425028	ENSMUST00000107764 // Hemgn // hemogen // 4 B1|4 // 93966 /// NM_053149 // Hemgn // hem	Hemgn	ENSMUST00000107764	ENSMUST00000107764 // ENSEMBL // cdna:known chromosome:NCBIM37:4:46406861:46417108:-1 g		5.28275	5.54311	5.36743	4.90905	5.35572	5.51284	5.79053	5.29264	5.13052	5.3911	5.39006	5.78589	5.52651	5.31097	5.53636	5.53365	5.51259	5.6098	5.54756	5.76229	5.55272	5.35982	5.54546	5.22381	5.62741	5.42243	5.54132	5.41735	5.45506	5.4175	5.64913	5.52935	5.51178	5.39474	5.71917	5.19162	5.54854	5.48536	5.61033	5.86556	5.84727
chr4	43770050	43771009	17424811	NM_019476 // Olfr159 // olfactory receptor 159 // 4 B1|4 // 29849 /// ENSMUST0000005393	Olfr159	NM_019476	NM_019476 // RefSeq // Mus musculus olfactory receptor 159 (Olfr159), mRNA. // chr4 //		3.17126	3.31403	3.34885	4.16488	3.44364	3.46125	3.35185	3.31127	3.57453	3.32232	3.33681	3.26563	3.51296	3.63563	3.41189	3.42954	3.01865	3.79719	3.28796	3.3137	3.04281	2.92826	3.59256	3.29854	3.30958	3.25587	3.47304	3.30174	3.74157	3.37072	3.351	3.78176	3.38039	3.33447	3.54074	3.60665	3.43998	3.289	3.49628	3.36273	3.17883
chr4	16464876	16509323	17412009	---		---	ENSMUST00000141571 // ENSEMBL // havana:lincRNA chromosome:NCBIM37:4:16392023:16436470:		3.96942	4.18682	4.07077	4.68164	4.11864	4.18305	4.06738	4.19326	4.05203	4.44095	4.64136	4.31265	4.0459	3.97672	4.18123	4.18127	3.99841	4.15762	3.94268	4.15978	4.23772	4.1164	4.30707	4.13023	4.0738	4.09551	4.03709	4.02657	4.01775	4.53854	4.10184	4.57983	4.20693	4.00184	4.04911	4.02699	4.33361	3.94572	4.2135	4.27208	3.97306
chr4	40948407	40965303	17412801	NM_029814 // Chmp5 // charged multivesicular body protein 5 // 4 A5|4 // 76959 /// ENSM	Chmp5	NM_029814	NM_029814 // RefSeq // Mus musculus charged multivesicular body protein 5 (Chmp5), mRNA		10.8705	10.7441	10.7127	10.4892	10.6115	10.5552	10.8581	10.8609	10.9416	10.6426	10.8026	10.7564	10.675	10.8939	10.3827	10.7181	10.7993	10.5151	10.5694	10.7182	10.9901	10.8981	10.8465	10.7197	10.8289	10.9048	11.1125	10.8789	10.8624	10.8592	10.9447	10.5012	10.8824	10.815	10.5829	10.8801	10.7008	10.8322	10.783	10.6684	10.885
chr4	8456166	8456498	17548330	ENSMUST00000167743 // Ube4b // ubiquitination factor E4B, UFD2 homolog (S. cerevisiae)	Ube4b	ENSMUST00000167743	ENSMUST00000118311 // ENSEMBL // cdna:pseudogene chromosome:NCBIM37:4:8383313:8383645:-		9.42535	9.10087	9.20589	9.12142	9.46195	8.84628	8.81947	9.31403	9.27611	9.03859	9.26864	9.10057	9.33332	8.8563	9.29899	8.41336	9.21278	8.96412	9.12517	8.99244	9.22527	9.19422	9.14481	9.06801	8.81767	9.02084	9.20721	9.26821	9.2784	9.15682	9.01573	8.77198	9.49735	8.92007	9.18418	9.20944	8.81951	9.23759	9.73189	9.2761	8.62168
chr4	14079809	14079940	17423390	---		---	ENSMUST00000104513 // ENSEMBL // ncrna:snoRNA chromosome:NCBIM37:4:14006956:14007087:-1		6.43212	6.50299	6.31658	5.46711	6.55885	6.75584	6.30261	6.25971	6.1267	6.31476	6.87847	6.33855	6.88566	6.37192	6.34834	6.28173	6.41193	6.57515	6.56254	6.41366	6.81157	6.27272	6.90977	6.29276	6.4373	6.40272	6.42296	6.14402	6.21209	6.21922	6.35812	6.79116	6.60567	6.38871	6.96636	6.38579	6.94492	6.39647	6.48965	6.74668	5.98557
chr4	37249403	37332515	17412708	---		---	AK029761 // GenBank HTC // Mus musculus adult male testis cDNA, RIKEN full-length enric		3.51136	3.5385	3.65465	3.6804	3.41985	3.36487	3.458	3.09292	3.23571	3.17803	3.5041	3.43153	3.4138	3.50107	3.51174	3.37272	3.76434	3.37994	3.28965	3.24168	3.37273	3.697	3.52332	3.18889	3.32769	3.36558	3.35693	3.37902	3.3667	3.3228	3.37747	3.20687	3.37513	3.54518	3.27815	3.28161	3.1102	3.28383	3.41239	3.54346	3.15762
chr4	16861689	16861794	17423505	---		---	ENSMUST00000082685 // ENSEMBL // ncrna:snRNA chromosome:NCBIM37:4:16788836:16788941:-1		6.01273	5.50072	6.36132	6.00021	6.79193	5.86678	5.65608	6.15306	5.87903	5.51147	5.63443	5.91551	5.74798	5.77805	7.01655	5.90023	5.62324	6.49349	6.01451	6.42077	5.10628	6.28963	5.82553	5.37383	5.04788	5.87678	5.85523	5.31578	5.52561	5.95399	6.1847	5.64277	5.85724	5.75961	5.73145	5.19153	5.58514	5.85453	5.91824	6.0228	5.48129
chr4	14864076	14915260	17411939	NM_028264 // Tmem55a // transmembrane protein 55A // 4 A1-A2|4 // 72519 /// ENSMUST0000	Tmem55a	NM_028264	NM_028264 // RefSeq // Mus musculus transmembrane protein 55A (Tmem55a), mRNA. // chr4		8.08185	8.70264	8.15912	8.09917	8.30049	8.58695	8.66013	8.88347	8.88579	8.01631	8.72883	8.53393	7.93365	8.43304	8.17291	8.55146	8.42299	7.29037	8.05167	8.57171	8.87161	8.90977	8.26854	8.81958	8.48588	8.59381	8.25826	8.15823	8.85998	8.9818	8.73154	8.3849	8.11991	8.73477	8.17268	8.23977	8.17597	8.47421	8.1698	7.92513	8.8573
chr4	45184875	45285936	17413615	ENSMUST00000107804 // Frmpd1 // FERM and PDZ domain containing 1 // 4 B1|4 // 666060 //	Frmpd1	ENSMUST00000107804	ENSMUST00000107804 // ENSEMBL // cdna:known chromosome:NCBIM37:4:45216797:45298808:1 ge		5.32158	4.91315	5.18688	5.22578	5.40789	5.2625	5.20083	5.22043	5.14562	5.07203	5.29523	5.19275	5.22282	5.06021	5.46344	5.35213	5.36253	5.48418	5.15123	4.94053	5.30198	5.02201	5.17294	5.11912	5.22323	5.19497	5.27253	5.00519	4.9929	4.76466	5.0582	5.41739	5.18243	5.19802	5.26474	4.9985	5.18057	5.22577	4.91568	5.18865	5.08251
chr4	13919954	13995193	17423386	AK086332 // D930021N14 // uncharacterized protein D930021N14 // 4 A1|4 // 329797	D930021N14	AK086332	AK086332 // GenBank HTC // Mus musculus 15 days embryo head cDNA, RIKEN full-length enr		3.52276	3.99457	3.52318	4.00609	3.526	3.78541	3.81719	3.76482	3.37009	3.95457	4.05254	3.67984	3.78362	3.4614	3.78868	3.8015	3.86298	3.94909	3.96794	3.75002	3.81198	3.59822	3.80145	3.63843	3.80838	3.55211	3.74714	3.56352	3.77084	3.72232	3.59184	3.95097	3.88055	3.42801	3.72337	3.81961	3.83431	3.64626	3.80126	3.74067	3.72521
chr4	19818725	19842218	17412085	NM_028746 // Slc7a13 // solute carrier family 7, (cationic amino acid transporter, y+ s	Slc7a13	NM_028746	NM_028746 // RefSeq // Mus musculus solute carrier family 7, (cationic amino acid trans		4.19791	4.27604	4.34806	4.49978	4.29166	4.13595	4.22565	4.26134	3.90619	4.00264	4.26985	4.24759	4.05863	4.22122	4.69967	3.88217	4.13052	4.0635	3.99872	3.94025	4.14621	4.24162	4.23849	4.0437	4.24635	4.24642	4.50885	4.0267	3.85296	4.38932	4.28895	4.28376	4.3642	3.88806	4.54094	4.25284	4.45622	4.1175	4.10193	4.16231	3.94096
chr4	40936398	40948294	17424094	NM_009736 // Bag1 // BCL2-associated athanogene 1 // 4|4 B1 // 12017 /// NM_001171739 /	Bag1	NM_009736	NM_009736 // RefSeq // Mus musculus BCL2-associated athanogene 1 (Bag1), transcript var		8.52724	8.47045	8.72849	8.88574	8.61745	8.46055	8.62022	8.72458	8.82454	8.7763	8.62449	8.4618	8.45515	9.12864	8.81577	8.72407	8.56272	8.44387	8.63437	8.77004	8.83292	8.87019	8.32937	8.75106	8.64944	8.46002	8.87319	8.78098	8.64749	8.56488	8.85022	8.48002	8.72029	8.70451	8.31627	8.69884	8.66934	8.55789	8.80284	8.51482	8.63587
chr4	41723836	41731142	17424309	NM_001017362 // Arid3c // AT rich interactive domain 3C (BRIGHT-like) // 4 A5|4 // 5506	Arid3c	NM_001017362	NM_001017362 // RefSeq // Mus musculus AT rich interactive domain 3C (BRIGHT-like) (Ari		6.07577	6.04291	5.88565	5.84566	6.25949	6.12693	6.22138	7.23315	5.8936	6.33444	6.27574	6.10082	6.17841	6.17599	5.85925	6.23119	6.23679	6.56193	6.11331	5.94841	6.33491	6.08293	6.19795	5.7359	5.85288	6.17238	6.17828	5.95297	5.97788	5.7925	6.16112	6.21209	6.35328	6.01723	6.23218	5.97421	6.0673	6.31041	6.29506	6.34784	5.90956
chr4	51799920	51800352	17414112	---		---	ENSMUST00000158329 // ENSEMBL // ncrna:misc_RNA chromosome:NCBIM37:4:51812792:51813224:		4.4149	4.679	4.47863	4.64683	4.70364	4.75278	4.64544	4.88027	4.80619	5.04186	4.15157	4.14772	4.63545	4.55062	4.85938	4.7082	4.6013	4.63571	4.74103	4.97992	4.69068	4.69727	4.76832	4.49163	4.57889	5.10019	4.8455	4.72299	4.65003	4.74461	4.95688	4.80754	4.63892	4.681	4.82929	4.81964	4.9708	4.26178	4.60963	4.90502	4.30561
chr4	28814297	28815076	17423732	---		---	ENSMUST00000153669 // ENSEMBL // cdna:known chromosome:NCBIM37:4:28741447:28742226:-1 g		4.18742	4.0558	4.02163	4.34039	3.97666	4.11703	4.08845	3.7828	3.93244	4.26714	4.03247	3.89639	3.95066	4.0179	4.18168	4.21186	4.065	4.21443	3.71197	3.88553	4.01521	3.88949	3.98238	3.84218	4.17211	4.14233	4.19932	3.99101	4.07529	3.97312	3.92141	4.11142	3.95709	4.05982	3.93919	3.98218	3.9751	3.71491	4.16933	4.2137	3.45967
chr4	41203057	41203133	17424199	---		---	ENSMUST00000158640 // ENSEMBL // ncrna:snoRNA chromosome:NCBIM37:4:41150090:41150166:-1		8.01197	8.23206	8.6242	7.7135	8.8695	8.00918	8.37302	8.40236	8.84715	8.2577	8.15324	8.28454	8.41403	8.78498	8.0006	7.38373	8.63048	8.5078	8.42775	8.39821	8.70816	8.23705	8.29557	8.5181	8.7303	8.76277	8.73708	8.72038	8.44049	8.64027	8.40601	8.37132	8.53442	8.36409	8.68979	8.36329	8.95751	8.33862	8.5988	8.91702	8.33083
chr4	43730034	43734534	17413463	BC147345 // 5430416O09Rik // RIKEN cDNA 5430416O09 gene // 4 B1|4 // 71406 /// NR_03335	5430416O09Rik	BC147345	BC147345 // GenBank // Mus musculus RIKEN cDNA 5430416O09 gene, mRNA (cDNA clone MGC:18		4.73338	4.58332	4.32507	4.81581	4.75668	4.7059	4.63267	4.60813	4.33462	4.61872	4.6986	4.49161	4.91808	4.49075	4.52549	4.22675	4.51798	4.74039	4.49399	4.53467	4.60042	4.50381	4.87536	4.45784	4.41109	4.30782	4.46012	4.43802	4.49804	4.05799	4.37069	4.51141	4.60326	4.50897	4.64698	4.6247	4.92997	4.6168	4.47836	4.94397	4.42091
chr4	45639936	45642304	17413662	AK044089 // Gm12408 // predicted gene 12408 // 4 B1|4 // 100040557 /// XR_106262 // Gm1	Gm12408	AK044089	AK044089 // GenBank HTC // Mus musculus 10 days neonate cortex cDNA, RIKEN full-length		5.74364	5.46861	5.61188	5.03326	5.64916	5.83584	5.6568	6.02106	5.88171	5.86682	5.89254	5.93344	5.70302	5.72295	5.67385	5.71923	5.40874	5.58554	5.51048	5.71871	5.74305	5.88755	5.48651	5.60024	5.58646	5.62436	5.77935	5.846	5.59582	5.50555	5.98054	5.85946	5.57188	5.81459	5.79719	6.00105	5.96364	5.77017	5.65048	5.6434	5.53402
chr4	6265612	6275633	17423051	NM_007824 // Cyp7a1 // cytochrome P450, family 7, subfamily a, polypeptide 1 // 4 A1|4	Cyp7a1	NM_007824	NM_007824 // RefSeq // Mus musculus cytochrome P450, family 7, subfamily a, polypeptide		3.68846	3.33459	3.52799	4.35914	3.54682	3.41284	3.57546	3.58039	3.49505	3.73728	3.8152	3.69624	3.53258	3.49692	3.3682	3.48486	3.57562	3.46349	3.57372	3.52447	3.34837	3.472	3.47499	3.63177	3.63172	3.72948	3.67081	3.54564	3.60629	3.60061	3.53718	3.55235	3.3793	3.57027	3.51304	3.4196	3.68349	3.45435	3.55069	3.61898	3.50782
chr4	9669279	9669350	17411714	ENSMUST00000108339 // Asph // aspartate-beta-hydroxylase // 4 A1|4 // 65973 /// ENSMUST	Asph	ENSMUST00000108339	ENSMUST00000108339 // ENSEMBL // cdna:known chromosome:NCBIM37:4:9376226:9596491:-1 gen		6.57545	6.62705	6.79399	6.30247	7.02134	6.64659	6.64995	7.16499	6.20475	6.31681	7.05097	6.76948	6.83702	6.64542	6.64738	6.35546	6.87279	7.07259	6.91104	6.21687	6.38029	6.76748	6.86836	6.64668	6.28853	6.28142	6.44318	6.40831	6.49932	6.43826	6.54295	6.37731	6.92839	6.44113	7.08962	6.51987	6.66937	6.45829	6.89961	7.02902	6.14464
chr4	30664596	30855744	17412335	NR_040655 // 4930556G01Rik // RIKEN cDNA 4930556G01 gene // 4|4 // 75332	4930556G01Rik	NR_040655	NR_040655 // RefSeq // Mus musculus RIKEN cDNA 4930556G01 gene (4930556G01Rik), non-cod		3.35206	3.35088	3.31242	4.01577	3.33645	3.16286	3.54921	3.39026	3.14077	3.3499	3.27914	3.32309	3.3427	3.30298	3.45767	3.51284	3.2574	3.52031	3.28747	3.2139	3.22588	3.36744	3.3424	3.14833	3.24541	3.28958	3.26594	3.17328	3.28032	3.18955	3.25096	3.38139	3.24132	3.23993	3.26422	3.47935	3.34602	3.43148	3.30866	3.33025	3.41099
chr4	15917240	15945507	17423463	NM_026172 // Decr1 // 2,4-dienoyl CoA reductase 1, mitochondrial // 4 A2|4 // 67460 ///	Decr1	NM_026172	NM_026172 // RefSeq // Mus musculus 2,4-dienoyl CoA reductase 1, mitochondrial (Decr1),		7.87861	8.41538	7.91023	7.67586	8.04195	8.04947	8.29536	8.32714	8.46705	8.30425	8.43746	7.85775	7.99373	7.87094	7.86235	8.17536	7.89051	7.74727	8.09558	8.37074	8.29404	8.33029	8.16892	8.36101	8.05237	8.25091	8.02543	7.99272	8.01895	8.46228	7.73947	8.16667	7.52624	8.03334	7.56149	7.733	7.72636	7.84471	8.03856	8.17722	7.94103
chr4	43136499	43136628	17424592	---		---	ENSMUST00000104364 // ENSEMBL // ncrna:snoRNA chromosome:NCBIM37:4:43149371:43149500:-1		3.8063	3.85947	3.92683	4.78853	4.03416	4.24584	4.05719	4.07584	3.85592	3.9662	3.76135	3.56306	3.93459	4.00154	5.02494	4.30309	3.77121	4.77509	3.72649	3.7912	4.05199	3.93249	4.41769	4.01048	3.94599	4.16043	4.17556	4.07668	4.17483	3.88354	3.74918	4.02429	4.41333	3.77099	4.07564	3.96273	4.06383	3.68631	4.32148	4.46095	4.38585
chr4	39450293	39451780	17412723	BC116915 // 1700009N14Rik // RIKEN cDNA 1700009N14 gene // 4 A5|4 // 75471 /// BC116917	1700009N14Rik	BC116915	BC116915 // GenBank // Mus musculus RIKEN cDNA 1700009N14 gene, mRNA (cDNA clone MGC:15		3.54525	3.41752	3.70287	4.05191	3.75811	3.4774	3.47454	3.5588	3.44622	3.62563	3.66337	3.64381	3.64611	3.36962	3.37127	3.57403	3.57245	3.49113	3.33584	3.33123	3.51709	3.41625	3.67076	3.55242	3.1173	3.80974	3.34653	3.25909	3.54009	3.47035	3.35413	3.97048	3.21078	3.71327	3.59184	3.47726	3.9679	3.54887	3.38996	3.88715	3.42421
chr4	33303569	33310137	17423799	---		---	AK038279 // GenBank HTC // Mus musculus 16 days neonate thymus cDNA, RIKEN full-length		5.84069	5.60521	5.587	5.17973	5.67922	5.73122	5.7185	5.51949	5.40213	5.40523	5.55349	5.61585	5.79994	5.55854	5.678	5.57863	5.53506	5.46639	5.61652	5.3836	5.61328	5.90302	5.57428	5.45484	5.66186	5.60396	5.86127	5.43414	5.62125	5.74809	5.41668	5.24046	6.16255	5.5132	5.81013	5.27014	5.61108	5.71969	5.58074	5.68795	5.7806
chr4	14809498	14826587	17423433	NM_152812 // Otud6b // OTU domain containing 6B // 4 A1|4 // 72201 /// ENSMUST000001172	Otud6b	NM_152812	NM_152812 // RefSeq // Mus musculus OTU domain containing 6B (Otud6b), mRNA. // chr4 //		9.19229	9.45845	9.10579	9.10041	9.37981	9.18006	9.31749	9.37387	9.31531	9.28179	9.11907	8.88439	9.17061	9.39647	9.01077	9.48219	9.20896	8.72148	9.05906	9.40136	8.99997	9.18133	8.96483	9.16568	9.26279	9.28428	9.07609	9.3971	9.70789	8.86897	9.26125	9.32876	9.35696	9.48689	9.57974	9.19431	9.08313	9.22341	9.18234	9.27483	9.57283
chr4	41312091	41312198	17424215	AK083369 // Dcaf12 // DDB1 and CUL4 associated factor 12 // 4|4 B1 // 68970 /// AK01794	Dcaf12	AK083369	AK083369 // GenBank HTC // Mus musculus 2 days neonate thymus thymic cells cDNA, RIKEN		6.32546	7.05644	7.18849	5.49928	6.57494	6.25254	7.19554	7.05275	7.83464	7.47958	6.78324	6.67324	6.7056	6.89207	5.74167	6.50377	7.11445	6.39196	6.6608	6.89744	8.4884	6.90605	6.57332	7.87442	7.48904	7.40875	7.3828	6.75811	7.02102	7.38165	6.87913	7.4441	7.13547	6.86861	6.37149	6.98076	6.7198	6.94958	7.31265	6.75904	7.21431
chr4	52989284	53001162	17414161	NM_028529 // Nipsnap3a // nipsnap homolog 3A (C. elegans) // 4 B2|4 // 73398 /// ENSMUS	Nipsnap3a	NM_028529	NM_028529 // RefSeq // Mus musculus nipsnap homolog 3A (C. elegans) (Nipsnap3a), mRNA.		3.74983	3.8272	4.17381	3.7192	3.73708	3.94793	3.68596	3.78291	3.51473	3.64916	3.89479	3.69827	3.85918	3.71294	3.68153	3.98648	3.68083	3.5995	3.83063	3.7004	3.76963	3.63731	3.83578	3.85256	3.52173	3.86529	3.96388	3.71235	3.71023	4.15674	3.6383	3.70395	3.74366	3.75627	3.83383	3.99597	3.89095	3.93249	3.71154	3.76386	3.72064
chr4	36645373	36645453	17423958	NR_030545 // Mir876 // microRNA 876 // 4|4 // 100124458	Mir876	NR_030545	NR_030545 // RefSeq // Mus musculus microRNA 876 (Mir876), microRNA. // chr4 // 100 //		3.8696	4.17471	3.632	3.83542	4.87821	4.3723	3.37737	2.5855	2.53389	3.12528	2.78622	3.54376	5.53921	5.97824	3.03935	4.40345	6.13424	2.96383	3.33555	2.97812	2.40386	3.89933	2.63663	2.51325	3.18813	2.58608	3.52947	2.84635	2.72742	2.36634	4.40211	4.80557	5.08228	5.8622	4.67829	4.75565	3.19792	4.17726	2.76908	2.72731	4.98789
chr4	45105208	45108114	17424928	NM_001099675 // Tomm5 // translocase of outer mitochondrial membrane 5 homolog (yeast)	Tomm5	NM_001099675	NM_001099675 // RefSeq // Mus musculus translocase of outer mitochondrial membrane 5 ho		5.11413	5.59479	5.78062	7.16893	5.73475	5.45914	5.3638	5.96395	5.62121	5.48714	5.3316	4.98266	5.09682	5.47187	4.92544	6.06667	5.69977	4.83797	5.58714	5.29439	5.90752	5.4158	5.81133	5.6834	5.9757	5.53866	5.55424	5.35042	6.37152	5.71521	5.52447	5.32776	5.62531	5.52197	4.78347	5.92512	5.30993	5.70983	5.74718	5.75646	5.80965
chr4	40143081	40199009	17412730	NM_007386 // Aco1 // aconitase 1 // 4 A5|4 20.9 cM // 11428 /// ENSMUST00000102973 // A	Aco1	NM_007386	NM_007386 // RefSeq // Mus musculus aconitase 1 (Aco1), mRNA. // chr4 // 100 // 87 // 2		8.93425	9.11691	9.1922	9.26287	9.18782	8.95081	9.05037	8.98346	9.28573	8.6354	9.21109	9.01054	8.95667	9.22196	9.14619	9.52618	9.05898	8.94466	9.11004	9.41445	9.31169	9.39899	9.08148	9.48691	9.37663	9.12709	9.30024	8.75423	9.02847	9.24836	9.30015	9.33835	9.21966	9.18369	9.14101	9.38646	8.99685	9.17647	9.12253	9.18048	9.10868
chr4	31174909	31175012	17423737	---		---	ENSMUST00000083119 // ENSEMBL // ncrna:snRNA chromosome:NCBIM37:4:31102059:31102162:-1		4.79968	4.97841	4.97403	5.74646	5.09198	4.34831	5.08348	5.01658	4.97286	4.69035	4.95251	4.822	5.05519	4.8716	5.22525	5.3222	5.03406	5.2649	5.03308	4.93683	4.91938	4.44644	5.36117	4.6311	4.57115	4.33965	4.88964	5.10173	4.89176	4.64187	4.99647	5.07899	5.12781	4.75271	4.81235	5.34623	5.18121	4.83092	4.43629	5.37939	5.2823
chr4	43506966	43513729	17413352	ENSMUST00000030183 // Car9 // carbonic anhydrase 9 // 4 B1|4 // 230099 /// NM_139305 //	Car9	ENSMUST00000030183	ENSMUST00000030183 // ENSEMBL // cdna:known chromosome:NCBIM37:4:43519838:43526601:1 ge		4.61566	4.88352	4.87658	5.49041	6.54008	4.74272	4.9405	5.07942	4.94412	6.73285	4.89741	4.90339	5.1669	4.77868	4.75821	5.0616	4.6734	5.24213	6.35812	7.19811	4.9409	4.67329	4.79426	4.58215	4.80414	5.03135	4.54427	4.71435	4.72546	4.65783	5.40241	4.72507	5.34816	4.71882	4.52261	4.7027	4.97023	4.54351	5.18472	5.21463	4.5424
chr4	46155347	46196311	17424998	NM_011728 // Xpa // xeroderma pigmentosum, complementation group A // 4 C2|4 21.5 cM //	Xpa	NM_011728	NM_011728 // RefSeq // Mus musculus xeroderma pigmentosum, complementation group A (Xpa		6.14501	7.42532	6.86121	6.62678	6.60959	6.58212	6.98397	6.50385	6.60596	7.15843	6.85618	6.56522	6.48784	6.43638	6.92276	6.4495	6.64378	6.89832	6.87496	6.61384	6.35263	6.50406	6.95372	6.75821	6.70971	7.06777	6.63476	7.21938	6.44015	6.91697	6.53826	7.11959	6.81612	6.34619	6.72321	6.43151	6.62159	6.92598	6.64982	7.53158	6.56695
chr4	43692686	43692817	17413456	---		---	ENSMUST00000158322 // ENSEMBL // ncrna:rRNA chromosome:NCBIM37:4:43705558:43705689:1 ge		4.06175	4.69703	4.12529	5.20359	4.442	4.14671	3.91888	4.22307	3.75316	3.96709	3.98592	4.17952	4.25869	4.26319	4.42845	4.78337	3.82946	4.94453	4.51214	4.62281	3.88282	4.13667	4.21206	4.12541	4.30825	4.32021	4.45263	4.27625	3.64635	3.82213	4.79839	3.99525	4.42639	4.2486	4.6211	4.48975	4.6646	4.58729	4.79714	4.73904	4.36532
chr4	20032846	20041564	17423597	AK143554 // 4930598A11Rik // RIKEN cDNA 4930598A11 gene // 4|4 // 117170	4930598A11Rik	AK143554	AK143554 // GenBank HTC // Mus musculus 6 days neonate spleen cDNA, RIKEN full-length e		4.57867	4.77074	4.83255	4.76311	4.83387	4.59317	4.61342	4.7656	4.77139	4.98188	4.75334	4.71577	4.94234	4.77538	4.79077	4.75467	4.7202	4.63374	4.7356	4.58566	4.86493	4.8704	4.59102	4.75653	4.72348	4.85831	5.09192	4.56709	4.76272	4.96742	4.96591	5.0553	4.79711	4.75366	4.81495	4.74042	4.85791	4.88119	4.66039	4.63407	4.7422
chr4	6686353	6990799	17423107	ENSMUST00000039987 // Tox // thymocyte selection-associated high mobility group box //	Tox	ENSMUST00000039987	ENSMUST00000039987 // ENSEMBL // cdna:known chromosome:NCBIM37:4:6613500:6917946:-1 gen		9.25712	6.81686	8.33399	8.09388	7.18897	8.01363	6.52146	7.6096	6.22115	6.34686	7.77745	6.62757	8.44428	7.43928	7.10659	9.07142	8.21825	9.34052	7.40202	6.03209	6.29986	7.66277	6.30106	6.55752	7.74965	6.63066	7.43191	8.13683	5.97779	6.57177	7.12404	8.19284	8.51607	8.69241	9.27386	8.24389	7.99125	8.7279	5.87409	7.47367	6.97292
chr4	10479962	10797811	17423193	NR_045185 // 1700123O12Rik // RIKEN cDNA 1700123O12 gene // 4 A1|4 // 73624	1700123O12Rik	NR_045185	NR_045185 // RefSeq // Mus musculus RIKEN cDNA 1700123O12 gene (1700123O12Rik), non-cod		4.14979	4.03902	3.88488	3.75837	4.38651	3.84954	4.14112	4.02654	3.87473	4.52242	4.02476	4.07356	3.99393	4.06418	3.89687	3.88642	4.05977	3.84641	4.01403	3.87651	3.79376	3.8004	4.20735	3.92906	3.80176	3.92896	4.16676	3.98637	4.26576	3.93614	3.79904	4.13098	3.88316	3.78881	3.97653	4.20475	3.8805	3.9195	4.21262	4.04602	3.76596
chr4	46114746	46138694	17424980	NM_173033 // Tstd2 // thiosulfate sulfurtransferase (rhodanese)-like domain containing	Tstd2	NM_173033	NM_173033 // RefSeq // Mus musculus thiosulfate sulfurtransferase (rhodanese)-like doma		7.95641	7.8734	8.25446	8.69936	7.96194	8.02279	8.0211	8.04639	8.20745	7.80377	7.9963	8.1904	7.97021	8.05415	7.36503	8.42321	8.27933	7.64758	7.96216	8.2917	8.23171	8.1192	7.92878	8.39364	8.27043	8.07374	8.27594	7.76754	8.19926	8.10919	8.29687	7.74399	8.20189	8.11061	7.46403	8.22276	7.97153	8.2739	8.36441	7.78483	7.94915
chr4	40482840	40525548	17424034	NR_040644 // 4933428C19Rik // RIKEN cDNA 4933428C19 gene // 4|4 // 71293 /// NR_040644	4933428C19Rik	NR_040644	NR_040644 // RefSeq // Mus musculus RIKEN cDNA 4933428C19 gene (4933428C19Rik), non-cod		3.54901	3.24989	3.61961	3.84526	3.34288	3.33412	3.54467	3.56814	3.58034	3.57296	3.50569	3.53015	3.52626	3.25874	3.82231	3.39443	3.53395	3.38583	3.25408	3.3598	3.39786	3.38319	3.20672	3.215	3.34069	3.33556	3.24607	3.20092	3.52058	3.77362	3.21614	3.35259	3.215	3.40363	3.51368	3.63902	3.56232	3.79229	3.55585	3.55537	3.60999
chr4	34663257	34687438	17423854	NM_011895 // Slc35a1 // solute carrier family 35 (CMP-sialic acid transporter), member	Slc35a1	NM_011895	NM_011895 // RefSeq // Mus musculus solute carrier family 35 (CMP-sialic acid transport		7.42157	7.74565	7.90076	7.45943	7.46767	7.77038	8.13375	8.15001	8.36444	7.54901	7.60863	8.04727	7.62106	8.1054	7.67734	8.0175	7.7281	7.3717	8.03616	7.80534	8.15869	8.01311	7.9017	8.48976	8.2074	8.15051	8.34308	8.01817	8.18843	8.20899	8.12758	7.75523	7.79402	7.81923	7.88779	8.23653	8.04252	7.70444	8.20572	7.73619	8.24216
chr4	35152055	35154050	17412692	NM_199157 // Ifnk // interferon kappa // 4 A5|4 // 387510 /// ENSMUST00000058595 // Ifn	Ifnk	NM_199157	NM_199157 // RefSeq // Mus musculus interferon kappa (Ifnk), mRNA. // chr4 // 100 // 10		4.0794	4.02313	4.27918	4.14239	3.99245	4.1199	4.07669	4.58824	4.43166	3.86921	4.40756	3.85137	4.11359	4.01863	4.15783	4.41083	4.14359	4.2431	4.02275	4.24854	4.02235	4.41527	4.07784	4.20289	4.00028	4.12721	3.98002	4.01512	4.18298	4.27004	4.59747	4.04612	5.09627	3.99366	4.16929	4.50052	3.98399	4.00607	4.09284	4.0385	4.16556
chr4	21270075	21270430	17412119	---		---	ENSMUST00000157448 // ENSEMBL // ncrna:misc_RNA chromosome:NCBIM37:4:21197222:21197577:		4.67926	4.79585	4.80021	5.61259	4.8175	5.04705	4.7733	4.86862	5.05738	5.15924	4.86112	4.71158	4.7245	4.79471	5.10737	4.74475	4.93557	4.82433	4.64847	4.84039	4.96891	4.96666	4.88972	4.7201	4.79907	5.04597	4.7869	4.5198	4.60641	4.80272	4.97493	4.76911	4.70489	4.97013	4.75988	4.73883	5.14496	4.65702	4.57881	4.63703	4.91608
chr4	11980669	11988471	17411878	---		---	BC027654 // GenBank // Mus musculus cDNA clone IMAGE:1068626. // chr4 // 100 // 100 //		5.99796	6.78934	6.44513	5.481	5.57533	5.18999	5.63997	5.51044	6.23405	6.16161	5.67303	6.12257	5.90608	6.07574	4.62173	6.41112	6.22868	5.56875	5.57505	5.93661	6.10559	5.94428	6.07198	6.37355	6.46799	5.84035	6.34598	6.95645	6.47494	6.18859	6.51691	6.48451	5.54753	6.10761	5.90022	6.48467	6.22713	5.96726	6.38664	6.20455	7.01584
chr4	26635820	26705449	17423728	NR_040656 // 4930548K13Rik // RIKEN cDNA 4930548K13 gene // 4|4 // 75360 /// NR_040656	4930548K13Rik	NR_040656	NR_040656 // RefSeq // Mus musculus RIKEN cDNA 4930548K13 gene (4930548K13Rik), non-cod		4.65434	5.05861	4.88384	5.32963	5.06137	4.92185	4.78082	4.73157	4.63031	5.17607	4.85552	4.84583	4.84383	4.68941	4.6698	4.78932	4.87014	4.553	4.76136	4.74211	4.58058	4.84677	4.64557	4.67246	4.65294	4.92563	4.97904	4.96155	4.85147	4.81537	4.60892	4.58621	4.79834	4.73499	4.64301	4.61205	4.72781	4.80956	4.8369	4.74817	4.73437
chr4	22928167	22938435	17423635	AK006362 // 1700025O08Rik // RIKEN cDNA 1700025O08 gene // 4 A3|4 // 69984	1700025O08Rik	AK006362	AK006362 // GenBank HTC // Mus musculus adult male testis cDNA, RIKEN full-length enric		4.65775	4.6363	4.57987	4.95243	4.80841	4.77323	4.53332	4.59476	4.68732	4.68205	4.72409	4.2398	4.43327	4.94593	4.38379	4.51829	4.54622	4.79514	4.60436	4.74253	4.56561	4.80075	4.81009	4.60042	4.5143	4.83365	4.72546	4.46706	4.73814	4.33972	4.81595	4.63302	4.91649	4.48056	5.04951	4.6969	5.13339	4.61927	4.66279	4.86508	4.68933
chr4	40970906	41025993	17412813	NM_023739 // Nfx1 // nuclear transcription factor, X-box binding 1 // 4 B1|4 19.9 cM //	Nfx1	NM_023739	NM_023739 // RefSeq // Mus musculus nuclear transcription factor, X-box binding 1 (Nfx1		8.88044	9.07386	9.26859	9.12313	9.19071	8.86328	9.20796	9.32853	9.35111	9.09001	8.97731	8.95267	9.05293	9.17142	8.85264	9.32934	9.08705	9.0791	9.08486	9.11789	9.28497	9.17964	9.09058	9.20506	9.24597	9.33146	9.13407	8.93938	9.34636	9.25693	9.23518	9.08652	9.04049	9.08348	8.86352	9.1171	8.88082	9.11199	9.18503	9.30994	9.0143
chr4	43695000	43700807	17424802	NM_019485 // Olfr70 // olfactory receptor 70 // 4 B1|4 // 56014 /// ENSMUST00000055545	Olfr70	NM_019485	NM_019485 // RefSeq // Mus musculus olfactory receptor 70 (Olfr70), mRNA. // chr4 // 10		6.16649	6.53631	6.48915	7.06465	6.58749	6.67404	6.64165	6.66683	6.40445	6.34761	6.56366	6.57759	6.67838	6.39404	6.47548	6.40293	6.56063	6.39355	6.5172	6.49098	6.33867	6.61485	6.61878	6.31706	6.66411	6.57193	6.6584	6.45131	6.4574	6.66864	6.71715	6.50064	6.41152	6.49649	6.57249	6.53039	6.75839	6.60442	6.63784	6.70503	6.17696
chr4	10987330	10988192	17548292	XR_140624 // Gm2401 // predicted gene 2401 // 4 A1|4 // 100039746	Gm2401	XR_140624	XR_140624 // RefSeq // PREDICTED: Mus musculus predicted gene 2401 (Gm2401), miscRNA. /		4.56862	4.8377	4.76812	5.22846	4.84259	4.80141	4.74192	4.81957	4.81146	5.02193	4.99111	4.83341	5.00407	4.60086	4.69952	4.89893	5.03362	4.95534	4.78657	4.9363	4.74191	4.77993	4.71919	4.67862	4.88784	4.87194	4.93804	4.88296	4.84115	4.87951	4.79641	4.70281	4.9491	4.70428	4.86121	4.91192	4.80821	4.73295	4.61717	4.46491	4.87004
chr4	10988662	11007927	17423209	NM_175175 // Plekhf2 // pleckstrin homology domain containing, family F (with FYVE doma	Plekhf2	NM_175175	NM_175175 // RefSeq // Mus musculus pleckstrin homology domain containing, family F (wi		7.48097	7.53061	7.24995	7.64832	7.44871	7.41309	7.47663	7.40458	6.96382	7.35186	7.66262	7.28307	7.46087	7.3796	7.3632	7.55403	7.61572	7.49442	7.54988	7.68464	7.30217	7.53313	7.51482	7.43413	7.32601	7.23804	7.66949	7.16425	7.36438	7.44502	7.70429	7.74099	7.65665	7.45352	7.27651	7.58312	6.94449	7.25211	7.01948	7.06613	7.26277
chr4	33132521	33163588	17412579	ENSMUST00000029947 // Gabrr1 // gamma-aminobutyric acid (GABA) C receptor, subunit rho	Gabrr1	ENSMUST00000029947	ENSMUST00000029947 // ENSEMBL // cdna:known chromosome:NCBIM37:4:33219496:33250563:1 ge		4.65023	5.79173	5.94828	5.64019	5.26228	4.66088	5.0538	4.31703	4.22174	5.08296	4.41098	4.65645	4.96092	4.91602	5.26742	5.33538	5.03372	5.19215	4.62152	4.88422	4.14379	4.59722	5.05749	4.74435	5.31044	4.90406	4.72527	5.12848	5.06101	4.47775	4.49728	4.99573	4.50313	4.7652	4.72577	4.69922	5.13982	4.91169	4.79983	5.02007	4.47789
chr4	19979445	20005739	17423591	NR_040768 // 4930480G23Rik // RIKEN cDNA 4930480G23 gene // 4|4 // 74988	4930480G23Rik	NR_040768	NR_040768 // RefSeq // Mus musculus RIKEN cDNA 4930480G23 gene (4930480G23Rik), non-cod		4.19261	4.15625	4.43938	3.83387	4.3504	4.34793	4.18196	4.51854	4.32205	4.13499	4.31825	4.07262	4.33121	4.22901	4.16252	4.34307	4.32664	4.2817	4.13499	4.28204	4.37809	4.29266	4.28687	4.20535	4.11737	4.05211	4.23141	4.15171	3.97943	4.01508	4.10815	4.48204	4.31448	4.27186	4.21058	4.45617	4.39135	4.22929	3.97465	4.13785	3.9917
chr4	42969946	42974325	17413206	NM_026088 // 1700022I11Rik // RIKEN cDNA 1700022I11 gene // 4 B1|4 // 67317 /// ENSMUST	1700022I11Rik	NM_026088	NM_026088 // RefSeq // Mus musculus RIKEN cDNA 1700022I11 gene (1700022I11Rik), mRNA. /		4.77931	5.00311	4.51239	5.39437	4.87302	5.21458	4.8179	4.92421	4.82454	4.92996	5.02023	4.95865	4.69123	4.39328	4.70382	4.90866	4.72711	4.98947	4.83309	4.57884	4.48925	4.72792	4.80726	5.00045	4.71548	4.5355	4.59083	4.6341	4.95101	4.45675	4.78198	5.18447	5.03429	4.67587	4.66547	4.99817	5.36307	4.79866	4.81274	5.12677	4.78481
chr4	29068079	29088811	17412323	---		---	ENSMUST00000154813 // ENSEMBL // havana:lincRNA chromosome:NCBIM37:4:28995229:29015961:		3.73381	4.27857	4.03258	4.30763	3.97278	4.20465	4.04113	4.29395	4.01176	4.02352	4.08696	3.96922	4.19815	4.01936	3.93567	3.81614	4.02642	3.71062	4.07949	3.80746	3.89132	3.98785	3.95436	4.00837	4.28893	3.92047	3.79971	3.83814	4.26338	4.0201	4.07041	4.15087	4.07783	3.87829	3.95953	3.94234	3.92278	3.8924	3.96218	3.90462	3.99262
chr4	53205066	53217857	17425355	AK015122 // 4930412L05Rik // RIKEN cDNA 4930412L05 gene // 4 B2|4 // 73941 /// AK141187	4930412L05Rik	AK015122	AK015122 // GenBank HTC // Mus musculus adult male testis cDNA, RIKEN full-length enric		4.01707	4.58922	4.44177	4.54203	4.56232	4.39618	4.46224	4.37433	3.96709	4.50554	4.26878	4.23348	3.96555	4.58051	4.21971	3.74364	4.36274	4.784	4.26402	4.08559	4.15308	4.40133	4.4479	4.11791	4.4186	4.34808	4.3985	4.60912	3.89722	4.193	4.53255	4.42673	4.19534	3.94001	4.4063	4.07666	4.48806	4.15396	4.28256	4.7734	3.96379
[truncated: 88 more columns]
