# Supplementary material for: A Systems Genetics Approach Identifies CXCL14, ITGAX, and LPCAT2 as Novel Aggressive Prostate Cancer Susceptibility Genes
Source: PLoS Genet. 2014 Nov 20;10(11):e1004809. doi: 10.1371/journal.pgen.1004809 (PMC4238980; doi:10.1371/journal.pgen.1004809)
Supplement: Table S12 — Correlation analysis for the microarray expression level of transcripts located within the chromosome 17 seminal vesicle tumor burden QTL with seminal vesicle tumor burden. (XLSX) [file pgen.1004809.s017.xlsx]

## Sheet: SVTB Chr 17
Chromosome	Start	Stop	ID				ID		N183	N185	N187	N197	N259	N265	N266	N275	N293	N294	N314	N329	N340	N343	N369	N371	N372	N380	N566	N574	N582	N583	N585	N586	N590	N591	N592	N596	N609	N614	N615	N618	N619	N637	N641	N649	N655	N662	N663	N803	N812
							Seminal Vesicles Wt (g)		3.15	5.6	0.76	0.4	0.1	0.4	0.1	1.7	2.73	0.1	0.2	1.3	0.2	2.68	0.2	0.91	1.63	2.32	0.4	2.01	1.45	0.3	0.6	3.19	1.23	0.2	0.2	0.5	0.3	3.22	0.51	1.2	0.4	0.4	0.6	0.3	0.8	0.56	0.34	1	1.1
chr17	34931253	34937297	17336811	NM_010893 // Neu1 // neuraminidase 1 // 17 B1|17 18.93 cM // 18010 /// ENSMUST000000072	Neu1	NM_010893	NM_010893 // RefSeq // Mus musculus neuraminidase 1 (Neu1), mRNA. // chr17 // 100 // 10		8.10249	8.06589	7.77825	7.83751	7.75482	7.6706	7.31741	9.20575	8.67502	7.37369	7.56263	7.58713	7.54963	7.91499	7.6626	7.62284	7.44324	8.11285	7.50426	7.87578	8.57165	7.66685	7.93666	8.36653	7.27286	7.38228	7.03125	7.53684	7.6704	8.41943	7.32555	7.13087	7.58026	7.69339	7.39405	7.33461	6.87868	7.21433	7.38253	7.15452	7.38302
chr17	6978860	6998193	17332956	NM_026611 // Rnaset2b // ribonuclease T2B // 17|17 // 68195 /// ENSMUST00000089119 // R	Rnaset2b	NM_026611	NM_026611 // RefSeq // Mus musculus ribonuclease T2B (Rnaset2b), mRNA. // chr17 // 100		10.906	10.6215	10.2355	10.1814	10.2887	9.72055	9.8524	11.3159	11.6218	10.362	9.59602	10.3658	9.45752	10.6991	9.61716	10.2483	10.5169	10.5401	9.86068	10.6224	11.667	10.0077	10.699	11.6829	10.3839	9.53012	10.0933	10.9829	9.75262	11.408	10.2075	10.4651	9.84418	10.9606	9.79951	9.83408	9.82535	9.80555	10.306	10.0773	10.1249
chr17	26941452	26970645	17335017	---		---	ENSMUST00000081285 // ENSEMBL // cdna:known chromosome:NCBIM37:17:27094363:27107590:1 g		7.58737	8.15382	8.27682	8.58486	8.54692	8.96879	8.4699	7.03471	6.5567	8.5124	8.63757	8.39647	8.60214	8.18657	9.97109	8.54067	8.47218	8.68592	8.65517	8.50035	6.74089	8.49885	7.56694	6.94131	8.67187	8.76743	8.03401	8.20706	8.54871	6.56695	8.60314	8.41006	8.54406	8.5022	8.51305	8.78004	8.60023	8.2999	8.62884	8.5426	8.73909
chr17	8128591	8147832	17340720	NM_001083938 // Rnaset2a // ribonuclease T2A // 17 B2|17 // 100037283 /// ENSMUST000000	Rnaset2a	NM_001083938	NM_001083938 // RefSeq // Mus musculus ribonuclease T2A (Rnaset2a), mRNA. // chr17 // 1		10.9519	10.6099	10.2414	10.1634	10.3162	9.71632	9.838	11.3771	11.5566	10.3499	9.58477	10.367	9.43813	10.7122	9.52404	10.2377	10.5184	10.5201	9.74487	10.6228	11.7686	9.95312	10.7001	11.7548	10.4484	9.47195	10.1133	11.0081	9.81427	11.4432	10.2489	10.4425	9.91234	10.9563	9.78109	9.83408	9.71088	9.76718	10.3017	10.0371	10.1256
chr17	28769307	28778704	17335383	NM_011950 // Mapk13 // mitogen-activated protein kinase 13 // 17|17 A3-B // 26415 /// E	Mapk13	NM_011950	NM_011950 // RefSeq // Mus musculus mitogen-activated protein kinase 13 (Mapk13), mRNA.		9.25	6.19955	5.73947	5.03053	5.66631	5.70852	5.4688	8.48719	9.8209	5.55698	6.01994	5.46642	5.5748	6.32445	5.4743	7.98994	5.82565	8.44099	5.61451	5.81296	9.71809	5.77306	7.41278	9.61735	6.94812	5.7707	6.04535	7.23131	5.24992	9.22006	5.64276	5.80151	5.58818	6.0491	7.42503	5.54221	5.80618	5.65926	5.61087	5.45047	5.58204
chr17	14279506	14404790	17333465	NM_022315 // Smoc2 // SPARC related modular calcium binding 2 // 17 A2|17 10.0 cM // 64	Smoc2	NM_022315	NM_022315 // RefSeq // Mus musculus SPARC related modular calcium binding 2 (Smoc2), mR		9.6668	7.82674	7.00682	6.43513	6.65479	6.40555	7.65331	10.0096	9.86432	7.71519	6.63116	7.4117	6.6756	7.93375	6.98851	8.34453	6.43647	8.45332	7.32808	6.74214	8.91645	6.65078	8.10382	8.93826	7.43287	7.30768	5.86166	7.81899	8.22209	9.28644	6.53549	6.47901	6.60077	8.14796	7.58392	6.48599	6.56698	6.29531	6.27138	6.66267	6.39147
chr17	24639282	24650305	17341963	NM_023055 // Slc9a3r2 // solute carrier family 9 (sodium/hydrogen exchanger), member 3	Slc9a3r2	NM_023055	NM_023055 // RefSeq // Mus musculus solute carrier family 9 (sodium/hydrogen exchanger)		8.6987	8.28926	7.98863	7.98198	7.72348	8.08861	8.06768	9.61788	9.70838	8.25952	7.81164	8.42539	7.9922	8.35254	7.68124	8.29781	8.47685	8.10783	7.90165	8.14145	9.84231	8.20862	8.97765	10.1827	8.17115	8.32699	7.95797	8.49128	8.19046	9.92241	7.93068	7.98919	7.89111	8.71618	7.98117	7.62632	8.0253	7.84072	8.37327	8.07826	8.3333
chr17	24897506	24936977	17342065	NM_013931 // Mapk8ip3 // mitogen-activated protein kinase 8 interacting protein 3 // 17	Mapk8ip3	NM_013931	NM_013931 // RefSeq // Mus musculus mitogen-activated protein kinase 8 interacting prot		9.96134	10.1791	10.2887	10.3149	10.1872	10.5801	10.3606	9.00782	8.96427	10.1497	10.3993	10.3769	10.2229	10.1321	10.8498	10.5236	10.5695	10.2786	10.4462	10.2933	8.9862	10.4393	9.94221	8.79899	10.2219	10.375	9.96212	10.0789	10.1647	8.95107	10.217	10.1108	10.2172	10.4478	10.2119	10.3929	10.1638	10.3854	10.2441	10.2922	10.3267
chr17	6904681	6948721	17340631	NM_001083945 // Rsph3b // radial spoke 3B homolog (Chlamydomonas) // 17 A1|17 // 100037	Rsph3b	NM_001083945	NM_001083945 // RefSeq // Mus musculus radial spoke 3B homolog (Chlamydomonas) (Rsph3b)		7.23538	7.75909	7.35696	6.96105	7.38993	6.86079	7.10912	7.66115	7.92041	6.9851	7.10907	7.65119	7.2647	7.19743	7.86625	7.3455	7.26408	7.16421	7.02595	6.97966	7.60248	7.37168	7.37414	7.97132	7.27538	7.00163	6.8625	7.255	7.17594	7.89886	6.97114	7.07813	6.79672	7.52255	7.44665	6.88909	6.71106	7.23688	7.11958	7.15596	7.14563
chr17	24736642	24742778	17334419	NM_013759 // Sepx1 // selenoprotein X 1 // 17 A3.3|17 10.0 cM // 27361 /// BC090646 //	Sepx1	NM_013759	NM_013759 // RefSeq // Mus musculus selenoprotein X 1 (Sepx1), mRNA. // chr17 // 100 //		8.3052	7.65599	7.40389	7.23161	7.63525	6.96896	7.30918	8.57267	8.88793	7.82388	7.02676	7.21991	6.0701	7.27992	7.92309	7.56491	7.75181	7.58461	7.23975	7.25492	8.30233	7.20695	7.68972	8.43387	7.32923	7.0941	6.60325	7.63704	7.26604	8.95777	7.22544	7.44168	6.90537	7.69967	7.54905	6.98802	6.72035	6.91153	7.38757	7.05119	7.30574
chr17	25809085	25821265	17334782	NM_001164225 // Fbxl16 // F-box and leucine-rich repeat protein 16 // 17 A3.3|17 // 214	Fbxl16	NM_001164225	NM_001164225 // RefSeq // Mus musculus F-box and leucine-rich repeat protein 16 (Fbxl16		7.47548	8.40108	8.15475	8.40571	8.0324	8.6907	8.26398	5.21414	5.42296	8.12224	8.36533	8.44834	8.48567	8.13492	8.40997	8.57114	8.67619	8.29358	8.43219	8.29021	5.83197	8.41169	7.86832	5.45798	8.27478	8.5345	7.98957	7.97155	8.27939	5.67772	8.17699	8.19366	8.33161	8.27308	8.35032	8.45641	8.20737	8.41785	8.2396	8.44565	8.57179
chr17	33915899	33929290	17336228	ENSMUST00000025161 // Tapbp // TAP binding protein // 17 B1|17 18.41 cM // 21356 /// NM	Tapbp	ENSMUST00000025161	ENSMUST00000025161 // ENSEMBL // cdna:known chromosome:NCBIM37:17:34056277:34066233:1 g		9.2126	8.65118	8.21072	8.56547	8.62298	8.51588	7.81953	10.1502	10.6165	7.91867	8.62663	8.4731	7.93534	8.36701	8.24979	8.37931	8.38073	8.40264	8.36924	8.73816	10.7438	8.61255	9.01399	10.7724	7.99097	8.05317	7.6661	8.62244	7.95483	10.3778	8.16951	8.36313	8.3662	8.71286	8.73123	8.18678	7.83428	7.7595	8.05604	8.25607	7.76371
chr17	27714352	27728951	17342770	ENSMUST00000114870 // Spdef // SAM pointed domain containing ets transcription factor /	Spdef	ENSMUST00000114870	ENSMUST00000114870 // ENSEMBL // cdna:known chromosome:NCBIM37:17:27851297:27865895:-1		6.82624	6.30463	6.12587	5.39071	6.33867	6.27807	6.15497	7.76867	8.30835	5.93182	6.65466	6.05534	6.5124	6.6026	6.62493	6.01771	6.34021	6.36575	6.38404	6.11581	8.07209	5.97028	6.78038	8.44971	6.21223	6.13672	6.1822	6.34152	6.23575	7.4555	6.10138	6.35988	6.35229	6.0607	6.39912	5.9403	6.24036	6.25586	6.06013	6.88341	6.08806
chr17	32120820	32166880	17343299	ENSMUST00000087723 // Notch3 // notch 3 // 17 B1|17 20.0 cM // 18131 /// NM_008716 // N	Notch3	ENSMUST00000087723	ENSMUST00000087723 // ENSEMBL // cdna:known chromosome:NCBIM37:17:32257765:32303825:-1		7.45734	7.06611	6.09716	5.46618	6.84317	6.9465	6.2425	7.49632	7.34168	6.37424	6.24207	6.73614	6.65942	6.66354	6.41111	6.49569	6.33626	7.53048	6.87474	6.963	7.60976	6.62957	7.55826	7.81994	6.60614	6.30665	6.43859	6.44576	6.48958	7.20518	6.79906	6.55885	6.17924	6.9903	6.43822	6.40792	6.92981	6.20894	6.75767	6.54199	6.61498
chr17	27751232	27820558	17342785	NM_001033279 // D17Wsu92e // DNA segment, Chr 17, Wayne State University 92, expressed	D17Wsu92e	NM_001033279	NM_001033279 // RefSeq // Mus musculus DNA segment, Chr 17, Wayne State University 92,		9.37009	9.08188	8.81592	8.92532	8.85521	8.96144	8.82964	9.98571	9.79307	8.74944	8.68226	8.70749	8.71522	8.95154	8.89787	8.83729	9.34611	8.86564	8.81447	8.83164	9.88726	8.7683	9.14856	9.71098	8.97631	9.09325	8.87818	9.01464	8.76209	9.62556	8.88415	8.51947	8.78802	9.09306	8.99617	8.89332	8.696	8.84324	8.84579	8.84192	8.92028
chr17	34914466	34930436	17336788	NM_023557 // Slc44a4 // solute carrier family 44, member 4 // 17|17 B2 // 70129 /// ENS	Slc44a4	NM_023557	NM_023557 // RefSeq // Mus musculus solute carrier family 44, member 4 (Slc44a4), mRNA.		6.91087	5.21704	4.77893	4.87495	5.07136	5.02847	5.35954	10.1864	9.37991	4.75908	5.09934	4.79331	5.12574	5.91062	5.23642	6.2935	4.97151	5.31003	4.90948	4.77367	9.43837	4.9743	7.257	9.54507	5.09007	5.17702	5.05216	6.57874	4.71303	8.95817	4.88512	4.7021	5.02271	5.38459	5.85666	4.79576	4.83404	4.71283	4.88817	4.94024	4.91796
chr17	27057304	27122223	17335060	NM_080553 // Itpr3 // inositol 1,4,5-triphosphate receptor 3 // 17 A3.3|17 19.0 cM // 1	Itpr3	NM_080553	NM_080553 // RefSeq // Mus musculus inositol 1,4,5-triphosphate receptor 3 (Itpr3), mRN		7.51931	6.43731	6.36285	6.33574	6.36729	6.6032	6.30492	8.37255	8.7243	7.1666	6.38201	6.39341	6.11522	6.63412	6.39082	6.34212	6.04705	6.73281	6.1766	6.88016	8.62642	5.97096	7.70863	8.79753	6.49951	6.29867	5.77722	6.87053	6.16811	8.18519	6.1739	6.97424	6.07097	6.96107	5.97772	5.99549	6.11232	5.90841	5.95711	6.24119	5.84904
chr17	24488783	24508909	17334275	NM_027937 // Caskin1 // CASK interacting protein 1 // 17 A3.3|17 // 268932 /// ENSMUST0	Caskin1	NM_027937	NM_027937 // RefSeq // Mus musculus CASK interacting protein 1 (Caskin1), mRNA. // chr1		8.32276	9.03162	8.85202	9.00965	9.25489	9.25203	8.82178	6.52729	6.34917	9.41451	8.91974	9.32422	8.91164	8.85377	9.52773	8.96635	9.11623	9.00704	8.94234	9.13729	6.72457	9.26652	8.62698	6.81277	8.87629	9.09681	8.46702	8.63538	8.87395	6.54355	8.81296	8.73562	8.88446	8.99575	9.0183	8.86216	8.70639	8.72323	9.13499	9.4476	9.25856
chr17	28575718	28583593	17335357	NM_026571 // Lhfpl5 // lipoma HMGIC fusion partner-like 5 // 17 B1|17 13.2 cM // 328789	Lhfpl5	NM_026571	NM_026571 // RefSeq // Mus musculus lipoma HMGIC fusion partner-like 5 (Lhfpl5), mRNA.		6.43494	8.32433	8.72914	8.22448	7.04589	7.91904	8.03331	4.39215	4.45579	8.04932	8.0824	8.51709	7.74603	8.14766	7.44995	8.95484	8.88897	7.36529	8.28134	8.56246	4.51997	8.57924	7.26316	4.94375	8.71992	8.25704	8.39068	8.15415	8.44771	4.97099	8.73327	8.4424	8.83288	8.28057	8.26989	8.37051	8.22258	8.26533	8.68019	7.9949	8.57307
chr17	6738041	6782784	17340609	ENSMUST00000064234 // Ezr // ezrin // 17 A1|17 // 22350 /// NM_009510 // Ezr // ezrin /	Ezr	ENSMUST00000064234	ENSMUST00000064234 // ENSEMBL // cdna:known chromosome:NCBIM37:17:6942390:6987133:-1 ge		10.4296	9.3653	9.04856	9.21655	9.05606	9.4349	9.16009	11.4585	11.4179	9.26638	8.92652	9.22925	9.31844	9.64525	9.01707	9.69221	9.78109	9.2995	9.07922	8.9232	10.9266	8.75148	10.7091	11.0217	9.1179	9.19931	8.46794	10.117	8.67477	11.3643	8.99135	9.1333	8.98428	9.47967	9.23272	8.71483	8.79997	8.51152	8.51222	8.79684	8.19962
chr17	35743323	35764191	17344441	---		---	ENSMUST00000174630 // ENSEMBL // havana:lincRNA chromosome:NCBIM37:17:35880268:35901136		4.5558	4.47618	4.22954	4.33738	4.0252	4.34351	4.61594	4.96275	5.2359	4.48681	4.14742	4.09502	3.96294	4.405	3.85588	4.20622	4.33633	4.38527	4.77536	4.43463	5.08819	3.77509	4.18748	4.44931	4.16571	4.21037	4.36952	4.55042	3.7585	5.20445	4.29374	4.42561	3.96452	4.20249	4.16842	4.44835	4.13739	4.1379	3.75623	4.10515	4.02335
chr17	24685092	24689955	17341979	NM_011522 // Syngr3 // synaptogyrin 3 // 17 A3.3|17 // 20974 /// ENSMUST00000007236 //	Syngr3	NM_011522	NM_011522 // RefSeq // Mus musculus synaptogyrin 3 (Syngr3), mRNA. // chr17 // 100 // 8		8.72617	9.26456	9.73117	9.3384	8.92821	9.43608	9.32733	7.56202	7.77835	9.41606	9.27407	10.1734	9.2328	9.29914	8.64816	9.97517	10.4436	8.42629	9.28529	9.45485	7.42665	9.7941	8.99157	7.73839	9.83261	9.6384	9.09204	9.084	9.57565	7.79522	9.36011	9.66582	9.6798	9.6794	9.71984	9.27023	9.58268	9.67986	9.59621	9.18817	9.73961
chr17	12648874	12675838	17340831	NM_009202 // Slc22a1 // solute carrier family 22 (organic cation transporter), member 1	Slc22a1	NM_009202	NM_009202 // RefSeq // Mus musculus solute carrier family 22 (organic cation transporte		9.38989	5.2834	5.44091	5.12641	5.64656	5.65664	5.48562	11.0472	11.0568	5.62307	5.64381	5.89433	5.49621	7.62906	5.98956	6.58396	5.48946	6.06754	5.75987	5.32938	10.3339	5.66428	8.80144	9.92379	6.38611	5.83334	5.66752	7.90209	5.23396	11.2066	5.54108	5.66901	5.57355	5.50632	6.54552	5.98308	5.9142	5.56133	5.81083	6.16945	5.15686
chr17	24203831	24209387	17341758	NM_010947 // Ntn3 // netrin 3 // 17 A3.3|17 // 18209 /// ENSMUST00000024931 // Ntn3 //	Ntn3	NM_010947	NM_010947 // RefSeq // Mus musculus netrin 3 (Ntn3), mRNA. // chr17 // 100 // 100 // 21		5.84071	6.77694	6.41491	7.18816	6.48511	6.83279	6.86141	6.15161	5.57819	6.62551	6.6402	6.84686	6.73152	6.30826	6.04682	6.78738	7.16524	6.06761	6.90895	6.81062	5.43438	6.88022	6.24396	6.23161	6.67756	6.87176	6.83873	6.50876	7.06618	5.69403	6.89518	6.91401	6.85259	6.73732	6.6382	6.78468	6.75846	6.94017	6.63081	6.48596	6.7927
chr17	25748613	25754327	17342340	NM_018857 // Msln // mesothelin // 17 A3.3|17 // 56047 /// ENSMUST00000075884 // Msln /	Msln	NM_018857	NM_018857 // RefSeq // Mus musculus mesothelin (Msln), mRNA. // chr17 // 100 // 100 //		7.52075	6.04802	5.26695	5.41558	5.75577	5.53027	5.67871	5.81448	7.13376	5.09475	5.26924	5.42183	5.25525	5.34191	5.38352	5.43537	5.11865	5.96656	5.32328	5.20353	6.16026	5.14531	6.75125	5.73139	5.44245	5.37125	5.31828	5.79289	5.1599	5.7361	5.33428	5.33651	5.57187	5.51237	5.3811	5.27065	5.50734	5.0641	5.43961	5.43713	4.81414
chr17	33996012	34000333	17343710	NM_001001892 // H2-K1 // histocompatibility 2, K1, K region // 17 B1|17 18.44 cM // 149	H2-K1	NM_001001892	NM_001001892 // RefSeq // Mus musculus histocompatibility 2, K1, K region (H2-K1), tran		11.2055	9.30322	9.27611	9.05747	9.69121	9.19148	8.41717	9.51056	11.6445	9.28456	9.11159	9.0769	8.91307	10.29	9.96897	9.46735	9.26257	9.05399	9.27985	10.1589	11.9996	9.3626	10.4386	12.1698	9.00156	8.79129	9.15315	9.88701	8.85474	11.9031	9.22818	9.7701	9.08819	10.2096	9.02859	9.48422	8.69429	8.25856	9.05417	8.47301	8.42589
chr17	23660523	23668621	17334080	NM_153784 // Ccdc64b // coiled-coil domain containing 64B // 17 A3.3|17 // 212733 /// E	Ccdc64b	NM_153784	NM_153784 // RefSeq // Mus musculus coiled-coil domain containing 64B (Ccdc64b), mRNA.		6.72065	6.23001	6.10979	6.35504	6.05309	6.61882	6.09227	6.86878	7.38276	6.16291	6.23452	6.05164	6.20268	6.05456	6.30715	6.62977	6.21499	6.07027	5.9838	6.09313	7.29631	6.22776	6.25917	7.6626	6.05103	5.96437	6.17254	5.91513	6.05942	7.40636	6.12563	6.14492	6.10542	5.89097	6.0147	6.25467	6.26525	6.23556	6.14887	5.917	5.66268
chr17	5492600	5753891	17332766	NM_146073 // Zdhhc14 // zinc finger, DHHC domain containing 14 // 17 A1|17 // 224454 //	Zdhhc14	NM_146073	NM_146073 // RefSeq // Mus musculus zinc finger, DHHC domain containing 14 (Zdhhc14), m		9.11685	8.71145	8.8849	9.13999	8.4378	8.37263	8.61632	8.96417	9.43273	8.13263	7.66922	8.20085	8.13919	9.15781	7.95025	8.93984	9.18253	9.08448	8.80569	8.47012	9.50563	8.60048	8.82993	9.66331	8.87933	8.80097	8.00887	8.74674	8.69139	9.37506	8.86686	8.97596	8.41398	9.04287	8.64319	8.45266	8.29749	8.59077	8.17012	8.73173	8.20779
chr17	34143307	34151553	17336414	ENSMUST00000041982 // H2-DMb2 // histocompatibility 2, class II, locus Mb2 // 17 B1|17	H2-DMb2	ENSMUST00000041982	ENSMUST00000041982 // ENSEMBL // cdna:known chromosome:NCBIM37:17:34282258:34288498:1 g		5.77834	5.41385	5.09791	5.38363	5.06848	5.18572	5.07615	6.22242	6.07101	5.41186	4.93106	5.2908	5.0349	5.69388	4.96718	5.31454	5.32658	5.42458	4.99442	5.12616	5.28124	4.76506	5.24951	5.61144	5.75116	4.61633	5.36519	5.03457	5.16595	6.14278	5.36456	5.3598	5.00184	5.64286	5.20202	4.82913	5.58838	5.10384	4.86427	5.38283	5.01512
chr17	24426683	24439316	17334253	NM_010023 // Eci1 // enoyl-Coenzyme A delta isomerase 1 // 17 A3.3|17 // 13177 /// ENSM	Eci1	NM_010023	NM_010023 // RefSeq // Mus musculus enoyl-Coenzyme A delta isomerase 1 (Eci1), nuclear		9.41912	9.05531	8.70076	8.89229	8.67638	8.5581	8.73195	9.49928	10.1998	8.78584	9.20142	8.84034	8.73295	8.64976	9.087	8.90469	9.14341	8.57993	8.6764	8.91911	9.86532	9.06925	8.93307	10.0557	8.53746	8.60036	8.81975	8.64035	8.83835	9.97298	8.59365	8.59504	9.06844	8.94096	8.99847	8.8353	8.22407	8.39388	8.51926	8.60486	8.3831
chr17	35865593	35875596	17337276	NM_175242 // Ppp1r18 // protein phosphatase 1, regulatory subunit 18 // 17 B1|17 // 764	Ppp1r18	NM_175242	NM_175242 // RefSeq // Mus musculus protein phosphatase 1, regulatory subunit 18 (Ppp1r		6.91512	7.61923	7.22115	7.39583	7.56529	7.65484	7.5308	6.43407	6.59978	7.69395	7.56282	7.51705	7.44727	7.15253	7.84565	7.26667	7.50553	7.30665	7.47709	7.55464	6.30086	7.49111	7.15207	6.18955	7.19655	7.63022	7.19172	7.19607	7.28999	5.95829	7.14132	7.22236	7.44803	7.54537	7.11091	7.64348	7.24708	7.076	7.26024	7.325	7.50532
chr17	26211822	26244242	17342625	ENSMUST00000114988 // Itfg3 // integrin alpha FG-GAP repeat containing 3 // 17 A3.3|17	Itfg3	ENSMUST00000114988	ENSMUST00000114988 // ENSEMBL // cdna:known chromosome:NCBIM37:17:26348767:26381168:-1		8.10199	8.1256	7.27337	7.35065	8.2466	7.22994	7.2838	9.14566	9.02407	6.84328	7.18217	7.53404	6.78516	7.64958	6.86164	7.78575	7.63112	7.12515	7.69253	7.88922	8.92552	7.882	8.30274	8.9857	7.78124	7.32281	8.0161	7.83721	7.26328	8.74263	7.71207	7.53675	7.3692	8.34393	7.39772	7.43475	7.10185	6.95082	7.39292	6.64512	7.41409
chr17	31125306	31129646	17343164	ENSMUST00000024827 // Tff3 // trefoil factor 3, intestinal // 17 A3.3|17 17.0 cM // 217	Tff3	ENSMUST00000024827	ENSMUST00000024827 // ENSEMBL // cdna:known chromosome:NCBIM37:17:31262251:31266591:-1		5.72558	5.12391	5.34187	5.3565	5.3361	5.40924	5.24691	5.85603	9.41888	5.39654	5.72624	5.3629	5.643	5.84782	5.50904	5.4209	5.0692	5.21256	5.05577	5.18274	9.32857	5.16121	5.49114	9.57478	5.49402	5.32573	5.07672	5.18964	5.49486	5.77683	5.36219	5.47329	5.32669	5.20566	5.39316	5.29605	5.5044	5.34334	5.10324	5.65416	5.20345
chr17	12770631	12770882	17333318	---		---	ENSMUST00000158900 // ENSEMBL // ncrna:misc_RNA chromosome:NCBIM37:17:12963497:12963748		7.46933	6.51084	6.34562	5.32774	7.61418	6.47724	6.68334	8.86893	9.71874	6.44225	6.94045	6.09103	5.7868	7.20855	7.04989	5.42122	7.83861	6.98311	6.67279	6.67377	9.28396	7.65386	7.9307	9.1401	6.81849	6.72148	6.32604	7.5955	7.21107	9.44941	6.25043	6.79497	5.7787	6.71962	6.45859	6.797	6.72484	5.36607	6.95612	6.66255	5.91855
chr17	5841346	5931946	17332783	ENSMUST00000002436 // Snx9 // sorting nexin 9 // 17 A1|17 3.3 cM // 66616 /// NM_025664	Snx9	ENSMUST00000002436	ENSMUST00000002436 // ENSEMBL // cdna:known chromosome:NCBIM37:17:5841346:5931946:1 gen		8.43047	8.27073	8.34939	8.25516	7.99242	8.18335	8.13069	9.43804	9.30085	8.03443	8.07752	8.06434	8.18216	8.76149	8.55226	8.37276	8.59472	8.37089	7.71709	8.31637	9.18491	8.26953	8.62097	9.40373	8.49718	8.30145	8.00649	8.26811	8.0281	8.99575	8.15147	9.03371	7.88618	9.42844	7.67145	8.10559	8.13377	8.06197	7.99081	8.14207	8.06169
chr17	8311102	8327442	17333092	NM_134114 // Sft2d1 // SFT2 domain containing 1 // 17 A1|17 // 106489 /// ENSMUST000001	Sft2d1	NM_134114	NM_134114 // RefSeq // Mus musculus SFT2 domain containing 1 (Sft2d1), mRNA. // chr17 /		8.59916	8.63592	8.32453	8.14467	8.47171	8.18032	8.31385	9.2476	9.28108	8.29894	8.2369	8.63758	8.23026	8.57684	8.28486	8.55771	8.98341	8.23269	8.51966	8.64256	9.41785	8.57091	8.6935	9.64814	8.54012	8.26401	8.37284	8.72747	8.65213	9.26438	8.42254	8.10642	8.41333	8.65687	8.72158	8.42274	8.67909	8.63596	8.52408	8.40362	8.57706
chr17	33524196	33553782	17336086	NM_172619 // Adamts10 // a disintegrin-like and metallopeptidase (reprolysin type) with	Adamts10	NM_172619	NM_172619 // RefSeq // Mus musculus a disintegrin-like and metallopeptidase (reprolysin		7.94976	8.79225	8.7887	8.98741	8.9263	8.72181	8.72435	7.14183	7.16089	8.47243	9.26503	9.02859	8.85966	9.00259	9.79202	8.70281	9.40822	9.1707	8.61248	8.88738	7.48171	9.249	8.26816	8.22636	8.53482	8.83585	8.533	8.68325	8.7032	6.56254	8.77713	8.83569	8.88443	9.08492	8.59982	9.16821	8.79401	8.88029	8.62228	8.93912	8.92304
chr17	35059035	35062099	17336906	NM_001190449 // Ddah2 // dimethylarginine dimethylaminohydrolase 2 // 17 B1|17 // 51793	Ddah2	NM_001190449	NM_001190449 // RefSeq // Mus musculus dimethylarginine dimethylaminohydrolase 2 (Ddah2		8.52477	9.20929	9.00491	9.11382	8.86444	8.83065	9.22111	7.47466	7.79171	8.87479	9.10332	9.26209	8.86695	8.2182	8.54841	9.27795	8.85311	8.42143	9.23389	8.97238	7.63918	9.30973	8.11735	8.3059	8.67547	9.29525	9.02958	8.52548	9.29493	7.37756	8.82162	8.00318	9.39343	8.88163	8.91771	9.11736	8.82177	9.09238	9.48441	9.30965	8.80571
chr17	31255019	31277356	17343196	NM_025290 // Rsph1 // radial spoke head 1 homolog (Chlamydomonas) // 17 A3.3|17 13.25 c	Rsph1	NM_025290	NM_025290 // RefSeq // Mus musculus radial spoke head 1 homolog (Chlamydomonas) (Rsph1)		6.30648	7.00273	6.5909	6.85117	6.14491	7.74221	7.31609	6.08628	5.36164	7.23521	7.64639	8.4199	6.99423	6.09297	8.14989	7.03977	6.3083	6.48078	7.22401	6.89189	6.05534	7.06175	6.11182	5.74735	6.98214	7.10955	6.08425	6.91004	6.4725	6.0773	8.01793	7.0881	6.53123	6.82378	8.56975	7.56425	7.1837	6.63493	6.18293	6.18913	7.0064
chr17	24440087	24443105	17341843	ENSMUST00000119932 // Dnase1l2 // deoxyribonuclease 1-like 2 // 17 A3.3|17 // 66705 ///	Dnase1l2	ENSMUST00000119932	ENSMUST00000119932 // ENSEMBL // cdna:known chromosome:NCBIM37:17:24577510:24580029:-1		7.96137	6.51207	6.51831	6.17672	6.65484	6.49782	6.49674	7.39608	9.12434	6.08851	6.58554	6.55556	6.77139	7.00795	6.50479	7.17157	7.09857	6.71465	6.70683	6.9623	8.36949	7.07686	7.01733	8.72647	6.732	6.48609	7.05336	6.63647	6.67015	9.01043	7.12853	6.61459	6.3134	7.11746	6.59362	6.98552	6.66647	6.50539	6.49449	6.59649	6.90179
chr17	32796989	32809919	17343469	NM_183177 // Zfp811 // zinc finger protein 811 // 17 B1|17 // 240063 /// NM_001267583 /	Zfp811	NM_183177	NM_183177 // RefSeq // Mus musculus zinc finger protein 811 (Zfp811), transcript varian		5.96377	6.81212	6.61987	6.73391	5.79996	6.99049	6.96657	4.58593	4.15754	6.22244	6.77395	6.62316	6.61498	7.02826	6.91408	7.0137	7.01589	6.88097	6.58052	6.6242	4.25776	6.19365	6.20594	4.47098	7.04566	7.03746	6.82881	6.86697	7.36968	3.78204	6.44018	6.64408	7.07764	7.00264	5.44839	6.6634	6.8032	7.19431	6.90777	6.92031	7.11887
chr17	34839226	34850210	17344034	NM_021337 // Skiv2l // superkiller viralicidic activity 2-like (S. cerevisiae) // 17 B1	Skiv2l	NM_021337	NM_021337 // RefSeq // Mus musculus superkiller viralicidic activity 2-like (S. cerevis		8.91887	8.65607	8.57474	8.5201	8.71365	8.79703	8.53593	9.22382	9.47235	8.86053	8.59254	8.62994	8.60428	8.61664	9.00698	8.47737	8.7119	9.12221	8.55694	8.63785	9.19469	8.57411	8.75578	9.37494	8.62284	8.74215	8.23019	8.51324	8.35784	9.17565	8.47444	8.47605	8.74273	8.79813	8.94404	8.67311	8.56564	8.63808	8.49845	8.78763	8.40056
chr17	26561489	26656934	17334932	NM_026170 // Ergic1 // endoplasmic reticulum-golgi intermediate compartment (ERGIC) 1 /	Ergic1	NM_026170	NM_026170 // RefSeq // Mus musculus endoplasmic reticulum-golgi intermediate compartmen		10.1722	9.98991	9.66837	9.85824	9.65248	9.39172	9.75399	10.8935	10.6389	9.82907	9.27015	9.4698	9.45544	9.87839	9.75047	9.9923	9.85246	9.54542	9.68328	9.94417	10.5913	9.71302	9.98813	10.7246	9.85673	9.8234	9.56665	9.89876	9.92988	10.5944	9.68849	9.66262	9.78212	10.0027	9.44719	9.6187	9.53805	9.55008	10.1936	9.96857	9.48761
chr17	32924688	32947402	17343505	ENSMUST00000075253 // Cyp4f13 // cytochrome P450, family 4, subfamily f, polypeptide 13	Cyp4f13	ENSMUST00000075253	ENSMUST00000075253 // ENSEMBL // cdna:known chromosome:NCBIM37:17:33061633:33084347:-1		7.61519	7.34008	7.62312	7.16076	7.62307	6.73188	6.73081	8.88354	8.62315	7.10573	7.0678	8.05596	7.14132	7.35665	7.44261	7.43119	6.8988	7.74572	7.06429	7.48134	8.58739	7.08246	7.81837	8.71747	7.47293	6.92208	7.60008	7.72053	6.69706	8.66407	7.3251	7.42296	7.07169	7.51108	7.8576	7.11857	6.58819	7.12766	7.07126	7.18897	6.90754
chr17	25958370	25985796	17342544	ENSMUST00000041641 // Solh // small optic lobes homolog (Drosophila) // 17|17 A3 // 508	Solh	ENSMUST00000041641	ENSMUST00000041641 // ENSEMBL // cdna:known chromosome:NCBIM37:17:26095315:26122741:-1		7.65173	6.94496	7.01808	6.92413	7.20962	7.00635	7.24514	8.29569	7.916	7.15054	6.88331	6.79319	6.63941	7.32863	7.54499	7.21766	7.3574	7.62048	6.85268	7.11303	7.8614	6.86021	7.3691	7.84558	7.42714	7.2498	7.04372	7.21653	7.21665	7.63717	6.76447	7.04199	6.91928	7.46707	7.30711	6.94839	7.16688	7.04915	7.13155	7.07612	6.97486
chr17	29461896	29491925	17343057	NM_008842 // Pim1 // proviral integration site 1 // 17 A3.3|17 16.4 cM // 18712 /// ENS	Pim1	NM_008842	NM_008842 // RefSeq // Mus musculus proviral integration site 1 (Pim1), mRNA. // chr17		4.60676	5.0519	5.44779	5.43609	5.04075	5.615	5.05221	4.94377	4.63803	5.08897	5.53486	4.87545	5.39899	5.10234	5.46871	5.12863	4.80628	5.22514	5.3564	5.27897	5.03973	5.51351	5.29184	4.88911	4.84989	5.1192	5.34038	4.85518	5.42688	4.57522	5.05299	5.12585	5.3856	4.75599	5.39799	5.18554	4.91549	4.79384	5.26569	5.1004	4.93449
chr17	26917091	26932579	17334983	NM_053173 // Kifc5b // kinesin family member C5B // 17 A3.3|17 // 16580 /// ENSMUST0000	Kifc5b	NM_053173	NM_053173 // RefSeq // Mus musculus kinesin family member C5B (Kifc5b), mRNA. // chr17		7.17017	7.39021	7.73941	7.99532	7.46714	7.42133	7.73521	5.99726	6.00115	7.19614	7.85354	7.65155	7.64216	7.54996	7.84189	7.39198	7.88299	7.48835	7.76676	7.68098	6.56322	7.2253	7.03257	6.398	7.66092	7.72272	7.78148	7.30009	7.51825	5.68431	7.74583	7.44068	7.80515	7.59676	7.383	7.84041	7.73831	7.82676	7.45935	7.83378	7.1297
chr17	12942890	12960747	17340967	ENSMUST00000007005 // Acat2 // acetyl-Coenzyme A acetyltransferase 2 // 17 A2-A3|17 7.5	Acat2	ENSMUST00000007005	ENSMUST00000007005 // ENSEMBL // cdna:known chromosome:NCBIM37:17:13135756:13153613:-1		8.76173	8.69406	8.79328	9.20667	8.72016	8.90452	9.32319	8.30514	8.10464	8.91298	8.69402	9.26545	8.82679	8.95654	8.50458	9.22782	9.62385	8.51737	8.82501	8.98115	8.19704	8.95609	8.7138	8.44034	9.16972	9.16034	9.26395	8.84207	9.31835	8.37905	9.01271	8.87252	8.91081	9.11151	8.45122	9.24936	9.0368	9.15857	8.93746	8.80046	9.05288
chr17	10319919	10321141	17333186	U44941 // Qk // quaking // 17 A1|17 5.9 cM // 19317 /// U44941 // Qk // quaking // 17 A	Qk	U44941	U44941 // GenBank // Mus musculus quaking type II (QKII) mRNA, complete cds. // chr17 /		6.4365	6.83613	7.2564	6.44132	6.80616	6.23164	7.07321	5.54167	4.85642	6.59431	6.54167	6.8588	6.55274	6.77705	5.32462	6.23253	7.53401	6.32994	6.65687	6.67346	5.1975	7.33171	6.20982	5.64772	7.32	6.85999	7.07777	6.83057	7.41892	4.54583	7.18039	6.5447	6.26853	7.30139	7.03902	7.53561	7.04152	6.92152	7.04635	6.82518	7.61796
chr17	24155833	24163766	17341712	ENSMUST00000040735 // Amdhd2 // amidohydrolase domain containing 2 // 17 A3.3|17 // 245	Amdhd2	ENSMUST00000040735	ENSMUST00000040735 // ENSEMBL // cdna:known chromosome:NCBIM37:17:24292800:24300733:-1		7.10239	7.2624	7.04382	6.57479	6.95805	7.02264	6.91973	7.29005	7.4868	6.83829	7.37732	6.73363	6.96426	6.82745	7.15209	6.88162	7.00053	7.06488	7.02472	7.00656	7.20098	7.09766	6.91576	7.53187	6.71449	6.95669	6.81906	6.77285	6.80294	7.14032	6.78	6.79826	7.03143	6.93103	6.93351	6.87299	6.79198	6.68648	7.12334	6.87902	6.66124
chr17	10324602	10329312	17333188	NR_045461 // 1700110C19Rik // RIKEN cDNA 1700110C19 gene // 17 A1|17 // 76634	1700110C19Rik	NR_045461	NR_045461 // RefSeq // Mus musculus RIKEN cDNA 1700110C19 gene (1700110C19Rik), non-cod		5.57813	5.35371	5.98818	5.22014	5.86864	5.4079	5.42004	5.37282	5.06824	5.08555	5.42722	5.65974	5.48322	5.74833	5.50105	5.55614	5.98907	5.411	5.36791	5.58858	4.99565	5.86035	5.05262	5.12596	5.61921	5.95814	5.56779	5.85741	6.1813	4.70099	5.69802	5.26742	5.19344	5.88243	5.95687	5.97181	6.00823	5.58367	5.40097	5.40662	5.99518
chr17	6356796	6583118	17340532	NM_031395 // Sytl3 // synaptotagmin-like 3 // 17|17 A1 // 83672 /// ENSMUST00000097430	Sytl3	NM_031395	NM_031395 // RefSeq // Mus musculus synaptotagmin-like 3 (Sytl3), transcript variant 1,		8.02952	7.05958	6.58086	6.96428	6.58949	7.20335	6.70697	8.73595	8.43875	6.42263	7.20417	6.81327	6.77776	6.95377	7.5653	7.14787	6.72318	7.21762	6.67889	6.61075	8.30517	6.87455	7.60924	8.28214	7.0068	6.70118	6.23695	7.63487	6.59529	9.06616	6.83955	6.79712	6.51803	6.77411	7.00175	6.8508	6.5998	6.57751	6.19985	6.42076	6.70802
chr17	6106437	6251128	17332860	NM_054040 // Tulp4 // tubby like protein 4 // 17 A1|17 3.2 cM // 68842 /// ENSMUST00000	Tulp4	NM_054040	NM_054040 // RefSeq // Mus musculus tubby like protein 4 (Tulp4), transcript variant 1,		9.38166	9.46508	9.41155	9.71168	9.416	9.7696	9.71609	8.66945	8.59619	9.29812	9.63402	9.64776	9.54994	9.61984	9.44757	9.90027	10.0071	9.25766	9.54098	9.52633	8.59343	9.58665	9.21365	8.76779	9.65749	9.55119	9.44325	9.28509	9.5396	8.5201	9.6987	9.4922	9.68465	9.89148	9.46482	9.63547	9.56404	9.63141	9.24453	9.24419	9.81006
chr17	32800567	32800730	17343474	---		---	ENSMUST00000104150 // ENSEMBL // ncrna:snRNA chromosome:NCBIM37:17:32937512:32937675:-1		6.0584	7.31771	6.90284	6.46157	6.06818	6.43282	7.01326	4.72631	4.35968	6.69703	6.60139	6.41359	6.48572	6.90618	5.73659	6.59554	7.15632	6.82422	6.56718	6.63754	4.76401	6.6826	6.03595	3.8382	7.33439	7.39223	6.85216	6.48254	7.13338	4.61919	7.02853	6.96808	6.7365	7.01772	5.15983	6.84049	6.69247	6.87902	6.79004	7.28921	7.11125
chr17	12118704	12219645	17333222	NM_026644 // Agpat4 // 1-acylglycerol-3-phosphate O-acyltransferase 4 (lysophosphatidic	Agpat4	NM_026644	NM_026644 // RefSeq // Mus musculus 1-acylglycerol-3-phosphate O-acyltransferase 4 (lys		7.0249	7.11674	7.01277	7.25389	7.40259	7.20592	7.13468	5.90755	5.79534	7.13485	7.1379	6.85906	6.81974	7.09833	7.32582	7.32595	7.5957	7.37413	7.73322	7.74417	6.06438	7.45452	6.9661	6.03427	7.65992	7.39753	7.59228	7.05307	7.31445	5.62894	7.31742	6.97795	7.72037	6.93535	7.42387	7.44726	7.36869	7.06485	7.41757	7.66071	7.25464
chr17	34613350	34615971	17343882	NM_152922 // Egfl8 // EGF-like domain 8 // 17 B1|17 18.8 cM // 81701 /// ENSMUST0000001	Egfl8	NM_152922	NM_152922 // RefSeq // Mus musculus EGF-like domain 8 (Egfl8), mRNA. // chr17 // 100 //		7.15761	6.65682	6.65275	6.79637	6.7311	6.30371	6.79797	6.95387	7.24698	6.94119	6.4277	6.27292	6.16551	6.71996	6.6923	6.40345	6.75143	7.52841	6.37404	6.73389	7.33844	6.45212	6.71149	7.18445	6.65441	6.68268	6.97198	6.60324	6.75907	7.26572	6.52782	6.47729	6.37562	6.75133	7.10345	6.85184	6.27508	6.78967	6.70384	6.7605	6.37403
chr17	12752777	12753713	17547988	XR_141809 // Gm19270 // predicted gene, 19270 // --- // 100502594	Gm19270	XR_141809	XR_141809 // RefSeq // PREDICTED: Mus musculus predicted gene, 19270 (Gm19270), miscRNA		8.30185	7.55697	7.26056	7.23052	8.08462	7.49685	7.3618	9.48288	9.83231	7.299	7.5861	7.32145	7.13787	7.98491	7.07893	6.83947	8.69431	7.43201	7.63099	7.54795	9.80443	7.93326	8.5997	9.40019	7.54996	7.62485	7.33749	8.30479	7.90036	9.87797	7.32374	7.66936	7.01919	7.47807	7.57833	7.44362	7.60501	6.67882	7.68852	7.43149	6.74441
chr17	6040571	6079741	17340502	NM_001111017 // Serac1 // serine active site containing 1 // 17 A1|17 3.3 cM // 321007	Serac1	NM_001111017	NM_001111017 // RefSeq // Mus musculus serine active site containing 1 (Serac1), transc		7.54817	7.95021	8.06304	7.93238	7.9251	8.4408	8.09447	7.1459	7.54872	7.98267	8.25245	8.09506	8.03867	8.0462	8.60253	8.37498	8.60415	8.34978	8.11666	8.23698	7.53648	8.34424	7.69135	7.80227	8.23675	8.03912	8.10519	7.80496	8.05307	7.60052	8.21487	8.2142	8.08385	8.28875	7.76924	8.06845	7.95948	8.02933	8.09148	8.1106	8.33541
chr17	7926000	7934897	17333023	NM_145968 // Tagap // T cell activation Rho GTPase activating protein // 17 A1|17 // 72	Tagap	NM_145968	NM_145968 // RefSeq // Mus musculus T cell activation Rho GTPase activating protein (Ta		6.77816	6.69265	6.3522	6.69747	6.4063	6.49093	6.27678	9.94888	8.7962	6.75135	6.6181	6.78891	6.26342	7.5013	6.07916	6.58436	6.711	6.51327	6.61174	7.08844	8.24093	6.72249	7.92928	8.76537	6.29528	6.2315	6.37082	7.09978	6.42658	9.19608	6.69064	6.67573	6.45353	7.92993	6.73772	6.14275	6.39633	6.2858	6.1731	6.32728	6.12425
chr17	23668618	23673882	17341521	NM_001008425 // Thoc6 // THO complex 6 homolog (Drosophila) // 17 A3.3|17 // 386612 ///	Thoc6	NM_001008425	NM_001008425 // RefSeq // Mus musculus THO complex 6 homolog (Drosophila) (Thoc6), mRNA		8.35518	7.78043	8.90012	9.02875	8.5877	8.27365	8.51858	7.8062	8.13192	8.41602	8.39997	8.75896	8.65722	8.42727	8.35235	9.06622	9.2396	7.98169	8.74112	8.63849	7.93315	8.87688	7.82582	8.2974	8.53561	8.65602	9.10683	7.71125	8.78179	7.89678	8.95461	8.01949	8.77176	8.85159	8.12736	9.04753	8.59201	8.56698	9.09752	8.30345	8.77899
chr17	28331671	28350805	17342829	NM_001098226 // Tead3 // TEA domain family member 3 // 17 A3.3|17 8.5 cM // 21678 /// N	Tead3	NM_001098226	NM_001098226 // RefSeq // Mus musculus TEA domain family member 3 (Tead3), transcript v		7.39232	7.14866	6.67051	7.56405	7.10348	7.19391	6.91113	8.29639	8.18953	6.78974	7.08307	6.75542	7.30533	6.93396	7.88764	7.24365	6.93665	7.56463	7.07593	7.08898	8.16637	6.6687	7.37582	8.22771	7.05524	6.59586	7.00459	6.8866	6.13106	7.66041	7.67198	7.25713	7.33621	7.24166	6.90939	6.91928	7.14091	6.77175	6.48188	6.53792	6.71871
chr17	24528476	24528553	17334302	---		---	ENSMUST00000176215 // ENSEMBL // cdna:known chromosome:NCBIM37:17:24665212:24665688:1 g		6.22175	6.75592	6.21677	7.08658	7.28241	6.81017	7.28768	6.13798	7.12075	7.7354	7.40101	6.66858	7.65222	6.45584	8.25065	7.23795	7.61468	6.22004	7.28786	7.24935	6.75948	6.76289	6.83703	7.74288	6.97673	7.42557	7.71599	6.95515	7.31361	7.19671	7.38505	6.78116	7.3152	7.07745	5.57667	7.39172	7.28629	7.78667	7.6284	6.65609	6.64969
chr17	35397067	35397351	17337118	NR_051981 // H2-Q5 // histocompatibility 2, Q region locus 5 // 17 B1|17 19.17 cM // 15	H2-Q5	NR_051981	ENSMUST00000040240 // ENSEMBL // cdna:pseudogene chromosome:NCBIM37:17:35531071:3553453		7.01316	6.05859	6.68683	5.55974	6.46163	6.15717	6.20826	6.40079	7.61763	6.82395	5.93837	6.62007	5.58774	6.5919	6.855	5.62435	6.4187	6.17295	6.06407	7.04567	8.16146	6.22022	6.59474	7.91278	5.85767	6.30617	5.92115	6.56134	6.55328	7.40398	6.17527	6.76041	6.20459	6.41523	6.41588	6.14472	5.24167	5.77655	6.07206	6.03117	5.89669
chr17	24352023	24410201	17334205	NM_013855 // Abca3 // ATP-binding cassette, sub-family A (ABC1), member 3 // 17 A3.3|17	Abca3	NM_013855	NM_013855 // RefSeq // Mus musculus ATP-binding cassette, sub-family A (ABC1), member 3		8.91773	8.9599	8.24642	8.16542	8.17693	8.79527	8.76434	9.59893	9.75415	8.48819	8.76563	8.52169	8.52565	8.69978	9.02515	8.98038	8.87247	9.19277	8.71801	9.02698	9.83394	8.79571	8.82881	9.96156	8.71287	9.00763	8.39205	8.65423	8.55175	9.54294	8.3635	8.5796	8.69375	8.69882	8.54861	8.7191	8.42378	8.53764	8.35898	8.80486	8.54362
chr17	12682406	12769706	17340845	NM_010515 // Igf2r // insulin-like growth factor 2 receptor // 17 A-C|17 7.35 cM // 160	Igf2r	NM_010515	NM_010515 // RefSeq // Mus musculus insulin-like growth factor 2 receptor (Igf2r), mRNA		8.46702	8.17778	7.76389	7.74055	8.32532	8.31127	7.88907	9.32025	9.95179	7.75131	7.89578	8.12621	8.1298	8.05915	8.10262	8.04991	7.80013	8.13201	8.26957	8.24107	9.93025	8.15576	8.62288	10.0789	7.8442	8.05105	7.60532	8.15441	7.67628	9.85595	8.1236	7.41361	7.65178	8.55995	7.99489	8.24042	7.82364	7.47186	7.90175	7.46997	7.54854
chr17	6646606	6655939	17340599	NR_033520 // Tmem181b-ps // transmembrane protein 181B, pseudogene // 17 A1|17 // 54712	Tmem181b-ps	NR_033520	NR_033520 // RefSeq // Mus musculus transmembrane protein 181B, pseudogene (Tmem181b-ps		8.83746	8.13307	8.56918	9.23056	8.51249	8.3384	8.27756	6.7513	6.97658	8.0456	8.62498	8.30404	8.78895	8.33469	8.68729	9.2809	8.23256	8.19718	8.42017	8.23423	7.38926	8.77189	7.60026	7.5364	8.6242	8.32254	8.67261	8.0822	8.8195	6.56086	8.37823	8.13813	8.59251	8.4644	7.5396	8.57232	8.30504	8.42366	8.53629	8.53411	8.85645
chr17	5941280	6044290	17332804	NM_001113353 // Synj2 // synaptojanin 2 // 17 A2-A3.1|17 3.3 cM // 20975 /// ENSMUST000	Synj2	NM_001113353	NM_001113353 // RefSeq // Mus musculus synaptojanin 2 (Synj2), transcript variant 1, mR		7.30197	6.61709	7.05327	6.57713	5.90646	7.02801	6.11117	8.24069	8.62399	6.70986	6.74609	7.02639	6.39094	6.90607	6.61938	6.98606	6.43353	6.47922	6.43007	6.61471	8.55476	6.76226	7.21753	8.45685	6.17024	5.87462	5.5883	7.42407	6.11817	8.77519	6.30541	7.00247	5.96559	6.85563	5.74826	6.13109	5.6751	5.5888	5.91199	6.2408	5.82164
chr17	33875666	33890661	17343652	NM_001195298 // Kifc1 // kinesin family member C1 // 17 B1|17 18.38 cM // 100502766 ///	Kifc1	NM_001195298	NM_001195298 // RefSeq // Mus musculus kinesin family member C1 (Kifc1), mRNA. // chr17		7.05325	7.68975	7.51511	7.83545	7.41677	7.46427	7.81131	5.95206	5.95215	7.80199	7.89042	7.41695	7.83655	7.65631	8.40745	7.44657	7.8968	7.4492	7.61563	7.48516	6.29547	7.40031	6.71611	6.35563	7.35914	7.53709	7.67742	7.24017	7.36834	6.31239	7.77847	7.57577	8.23407	7.34613	7.12037	7.82815	7.32064	7.8934	7.56239	7.97021	7.18058
chr17	4851698	4854482	17340482	AK016314 // 4930579D07Rik // RIKEN cDNA 4930579D07 gene // --- // 75934 /// XR_107032 /	4930579D07Rik	AK016314	AK016314 // GenBank HTC // Mus musculus adult male testis cDNA, RIKEN full-length enric		4.32328	4.44756	4.24527	4.27885	4.51882	4.15875	4.32842	4.65434	4.894	4.68544	4.53163	4.54888	4.3974	4.30893	4.85473	4.02652	4.20489	4.42839	4.41221	4.48028	4.97814	4.39012	4.47163	4.76092	4.10937	4.32075	4.41731	4.11595	4.38198	4.73328	4.35243	4.47625	4.33626	4.1952	4.35962	4.47109	4.53437	4.33586	4.35317	4.69301	4.42463
chr17	25579174	25662826	17334697	NM_029624 // Lmf1 // lipase maturation factor 1 // 17 A3.3|17 11.5 cM // 76483 /// ENSM	Lmf1	NM_029624	NM_029624 // RefSeq // Mus musculus lipase maturation factor 1 (Lmf1), transcript varia		8.74165	8.66182	8.68361	8.70777	8.53814	8.55567	8.47949	9.14111	8.78808	8.40746	8.37379	8.77948	8.1066	8.57168	8.53736	9.09392	9.04253	8.82808	8.39326	8.86417	8.63825	8.52596	8.57418	8.55226	8.60896	8.40963	8.02798	8.38161	8.53117	9.0242	8.50446	8.66457	8.40171	8.95029	8.41169	8.48162	8.25534	8.38806	8.25032	8.24373	8.6395
chr17	15543079	15564340	17341214	NM_144809 // Prdm9 // PR domain containing 9 // 17 A2|17 // 213389 /// ENSMUST000001679	Prdm9	NM_144809	NM_144809 // RefSeq // Mus musculus PR domain containing 9 (Prdm9), mRNA. // chr17 // 1		7.21306	5.72539	5.61337	6.18572	6.54077	5.74827	5.93518	7.42863	8.31335	6.92985	5.74561	5.69141	6.24739	6.34184	6.42325	6.71239	5.80933	6.46437	6.27416	6.10776	8.07468	5.76235	6.71357	8.51723	6.39753	6.51091	7.24872	6.66519	6.23346	7.94597	5.38101	5.51978	5.93238	6.08302	6.58127	5.531	6.55737	6.26235	6.36472	5.99829	6.30001
chr17	26199183	26201369	17342617	NM_008113 // Arhgdig // Rho GDP dissociation inhibitor (GDI) gamma // 17 A3.3|17 // 145	Arhgdig	NM_008113	NM_008113 // RefSeq // Mus musculus Rho GDP dissociation inhibitor (GDI) gamma (Arhgdig		6.7759	7.87007	7.68791	7.67173	7.61035	7.87733	7.81282	6.19705	5.9473	8.31104	6.87717	8.41584	7.10213	6.78269	7.14963	8.0668	8.58178	7.80446	8.23263	8.17697	5.98484	7.61882	7.86908	5.93413	7.78879	8.89844	7.32287	7.676	8.91997	6.29676	7.75886	7.63881	8.04996	7.55179	7.54597	7.33129	8.39084	7.9495	9.44456	8.93454	7.59879
chr17	27019810	27029009	17342676	ENSMUST00000078691 // Bak1 // BCL2-antagonist/killer 1 // 17|17 B // 12018 /// NM_00752	Bak1	ENSMUST00000078691	ENSMUST00000078691 // ENSEMBL // cdna:known chromosome:NCBIM37:17:27156755:27165954:-1		7.51303	7.68059	7.34265	7.44374	7.88903	7.40253	7.37359	7.99772	7.99626	7.25223	7.34541	7.32959	7.32511	7.62583	7.50829	7.65893	7.75101	7.57116	7.63154	7.71069	7.92311	7.46577	7.32753	8.11419	7.47436	7.41287	7.28761	7.22354	7.35819	7.46596	7.21445	7.5357	7.71382	7.90305	7.34584	7.28561	7.32432	7.61432	7.28552	7.40473	7.34166
chr17	33239507	33255145	17343552	NM_029952 // Zfp955a // zinc finger protein 955A // 17 B1|17 // 77652 /// ENSMUST000000	Zfp955a	NM_029952	NM_029952 // RefSeq // Mus musculus zinc finger protein 955A (Zfp955a), mRNA. // chr17		6.61456	6.39721	7.32125	7.21059	6.55191	6.82044	6.99497	6.61827	6.76151	6.75692	6.98457	7.07216	6.99107	7.09229	5.84262	5.78349	7.94696	6.11693	6.92549	7.25315	6.67718	7.12232	6.31761	6.74211	7.17271	7.21103	7.80928	7.17889	7.62585	6.04532	7.17398	7.18074	7.23162	7.7492	6.74125	7.13493	6.47723	7.6799	7.26976	6.94872	7.42504
chr17	35480139	35480728	17337152	ENSMUST00000040279 // H2-Q10 // histocompatibility 2, Q region locus 10 // 17 B1|17 19.	H2-Q10	ENSMUST00000040279	ENSMUST00000174425 // ENSEMBL // havana:lincRNA chromosome:NCBIM37:17:35617084:35617673		7.10796	7.48522	7.50826	4.92319	8.14079	6.38242	6.23245	8.34531	9.15032	6.20033	5.99435	7.0605	5.73783	8.37664	7.04155	5.57218	7.11592	7.16863	6.814	6.7155	8.3615	6.22873	7.18836	7.53933	6.01894	6.49135	6.53872	8.44311	6.65072	8.7277	6.63416	8.14322	6.30655	8.42243	8.16603	6.60664	6.87917	6.73464	6.95315	5.94037	6.75674
chr17	31647082	31658754	17343251	NM_001163769 // U2af1 // U2 small nuclear ribonucleoprotein auxiliary factor (U2AF) 1 /	U2af1	NM_001163769	NM_001163769 // RefSeq // Mus musculus U2 small nuclear ribonucleoprotein auxiliary fac		9.71707	10.0652	10.0353	10.1748	9.88974	10.069	9.92936	9.35979	9.64476	10.2039	10.0892	9.93993	10.1324	10.2754	10.2548	10.0267	10.3046	9.38268	10.1228	10.1772	9.27297	10.0075	9.7958	9.66075	9.77199	9.80766	10.1449	10.0052	10.3064	9.38561	10.2076	10.3594	10.1505	10.2735	9.70221	10.2176	10.2964	9.93609	10.3643	9.93683	9.95669
chr17	12962739	12963193	17547990	XR_141809 // Gm19270 // predicted gene, 19270 // --- // 100502594 /// XR_141809 // Gm19	Gm19270	XR_141809	ENSMUST00000143477 // ENSEMBL // cdna:known chromosome:NCBIM37:5:101232929:101233488:1		7.6797	7.70464	8.06036	7.70835	7.52673	7.71303	7.91632	7.4058	7.55933	7.94953	7.71623	8.03797	8.04598	8.02861	7.9213	7.61981	8.19845	7.73401	7.89141	7.77011	7.49178	8.03787	7.49784	7.35827	8.193	8.05465	8.11394	7.67681	8.34247	6.9214	7.89331	7.723	7.74197	7.99683	8.30541	7.99518	8.02979	8.0213	8.27338	7.81804	8.10909
chr17	23575844	23599487	17341498	NM_011747 // Zfp13 // zinc finger protein 13 // 17 A3.3|17 // 22654 /// ENSMUST00000057	Zfp13	NM_011747	NM_011747 // RefSeq // Mus musculus zinc finger protein 13 (Zfp13), mRNA. // chr17 // 1		8.13517	8.58796	8.52856	8.68997	8.38326	8.39281	8.54039	7.67583	7.39602	8.20433	8.43908	8.27611	8.41936	8.56098	8.49417	8.32458	8.74538	8.15737	8.50241	8.41122	7.56821	8.45255	8.20203	7.92823	8.64832	8.67449	8.54357	8.14058	8.56064	7.51362	8.40556	8.54946	8.19812	8.69629	8.44038	8.30787	8.49433	8.72273	8.40124	8.87447	8.5268
chr17	28522381	28523148	17342887	XR_107053 // Gm20109 // predicted gene, 20109 // --- // 100504201	Gm20109	XR_107053	AK146407 // GenBank HTC // Mus musculus CRL-1722 L5178Y-R cDNA, RIKEN full-length enric		4.01076	4.36052	4.26145	4.59661	4.07383	4.75475	4.42118	4.14433	4.14954	4.44777	4.65029	4.45916	4.51172	4.3706	4.5893	4.31713	4.45232	4.18674	4.44937	4.3589	4.19075	4.30152	4.26837	4.15441	4.42414	4.50217	4.22855	4.0849	4.51387	4.31414	4.2988	4.51683	4.37631	4.37662	4.56745	4.29358	4.49962	4.21641	4.48628	4.35649	4.48599
chr17	34263209	34269418	17336494	NM_207105 // H2-Ab1 // histocompatibility 2, class II antigen A, beta 1 // 17 B1|17 18.	H2-Ab1	NM_207105	NM_207105 // RefSeq // Mus musculus histocompatibility 2, class II antigen A, beta 1 (H		9.43988	7.28073	7.84423	7.85974	7.55412	6.59346	6.50639	8.72784	9.96351	6.76197	6.08937	7.61029	6.33774	9.31004	6.50232	6.96196	7.42394	7.52494	6.80323	7.50626	9.62071	6.93327	7.65089	7.48502	7.26173	7.71827	6.49099	7.78354	8.32033	9.31686	7.72162	7.51519	7.55008	9.71115	8.84257	6.34314	6.14902	6.32681	6.44617	7.06328	6.79221
chr17	34181987	34187764	17343789	ENSMUST00000076602 // Psmb9 // proteasome (prosome, macropain) subunit, beta type 9 (la	Psmb9	ENSMUST00000076602	ENSMUST00000076602 // ENSEMBL // cdna:known chromosome:NCBIM37:17:34318932:34324697:-1		6.99261	6.1131	5.89133	6.29427	6.32071	6.32444	6.12856	7.30499	7.72739	5.50047	6.68502	6.78581	6.02589	6.34709	7.00912	6.85272	6.09974	5.85546	5.80609	7.20312	8.27389	6.49134	6.228	8.67385	5.84579	5.66195	5.86247	7.05048	6.30307	7.93045	5.84414	6.79417	6.06822	6.59226	5.92004	6.28998	5.97115	5.68779	5.55011	5.94339	5.63406
chr17	7738568	7827302	17340673	NM_001081416 // Fndc1 // fibronectin type III domain containing 1 // 17 A1|17 // 68655	Fndc1	NM_001081416	NM_001081416 // RefSeq // Mus musculus fibronectin type III domain containing 1 (Fndc1)		7.20148	6.55742	5.80003	6.56873	6.17602	6.6451	6.14921	7.03091	8.19581	6.3362	6.00457	6.30111	5.55528	7.00529	6.46605	6.86649	5.69174	6.55896	7.10576	7.0844	7.2009	6.17737	6.67885	6.73301	5.92182	6.39024	5.93285	6.29665	5.94983	7.19656	6.52925	6.54662	6.3875	7.74554	6.0776	6.10757	6.37051	6.0608	5.92329	6.50373	6.34841
chr17	24727829	24736149	17334406	NM_001163945 // Rpl3l // ribosomal protein L3-like // 17 A3.3|17 // 66211 /// ENSMUST00	Rpl3l	NM_001163945	NM_001163945 // RefSeq // Mus musculus ribosomal protein L3-like (Rpl3l), transcript va		6.95956	4.80294	4.7392	4.66929	4.71407	4.99672	4.88206	4.79558	4.736	4.56015	4.90709	4.74114	4.8824	4.80125	4.73613	4.67575	4.65423	4.78133	4.6962	4.57365	4.444	4.65864	5.62853	4.26581	4.71229	4.52563	4.73463	5.0101	4.92224	6.43692	4.92301	4.72084	4.85933	4.45036	4.71071	4.61151	4.67741	4.69426	4.63637	4.84545	4.69153
chr17	23741199	23745829	17341595	NM_028416 // Kremen2 // kringle containing transmembrane protein 2 // 17 A3.3|17 // 730	Kremen2	NM_028416	NM_028416 // RefSeq // Mus musculus kringle containing transmembrane protein 2 (Kremen2		6.39409	6.37527	6.69001	6.81606	6.65378	7.01213	6.68688	6.4597	6.10788	6.61743	6.5849	6.70799	6.65631	6.68492	6.75898	6.6173	6.71839	6.59873	6.61259	6.94152	6.19658	6.61961	6.65681	6.40998	6.3816	6.4313	6.81283	6.58555	6.38041	6.30694	6.73142	6.42608	6.56241	6.68443	6.47628	6.68496	6.98625	6.59156	6.89206	6.68907	6.81745
chr17	26113316	26123254	17334846	NM_021793 // Tmem8 // transmembrane protein 8 (five membrane-spanning domains) // 17|17	Tmem8	NM_021793	NM_021793 // RefSeq // Mus musculus transmembrane protein 8 (five membrane-spanning dom		7.2158	6.09155	5.92825	5.51158	6.93087	6.03874	6.11257	6.69749	7.69251	5.97044	5.45334	6.57223	5.93963	6.19757	5.81298	6.79158	6.56263	7.18168	6.12866	6.96082	7.63317	5.01858	6.69095	7.95764	6.29331	6.59658	5.82247	6.40851	6.35351	7.49166	5.95548	5.92399	5.81152	6.47793	5.87183	5.5617	5.85288	6.00574	6.329	6.17701	5.8833
chr17	24528251	24528744	17334299	NR_045289 // 2610019E17Rik // RIKEN cDNA 2610019E17 gene // 17|17 // 75614	2610019E17Rik	NR_045289	NR_045289 // RefSeq // Mus musculus RIKEN cDNA 2610019E17 gene (2610019E17Rik), non-cod		8.03713	8.19544	8.09039	9.01929	8.47152	7.84971	8.65774	8.15038	8.37693	9.08508	8.01635	8.32574	8.65213	8.09632	8.58658	8.63073	9.16065	8.12597	8.735	8.5234	7.97648	8.265	8.41532	8.31563	8.56828	8.54153	8.79162	8.68903	9.01253	8.05784	8.31755	8.34636	8.45589	8.62608	8.52019	8.75773	8.73147	8.48027	9.26242	8.50274	8.33654
chr17	24222549	24251409	17341781	NM_007634 // Ccnf // cyclin F // 17 A3.3|17 10.4 cM // 12449 /// ENSMUST00000073425 //	Ccnf	NM_007634	NM_007634 // RefSeq // Mus musculus cyclin F (Ccnf), mRNA. // chr17 // 100 // 63 // 29		8.64693	8.74071	9.04096	9.16119	8.98522	8.9995	9.28461	7.3714	7.97736	9.0196	8.96959	9.1739	8.86474	9.16737	8.86399	9.09692	9.6704	8.9859	9.09607	9.31001	8.10771	8.91141	8.62083	8.64549	9.47144	9.30605	9.18246	8.73565	9.23955	7.67824	9.28368	8.71013	8.79577	9.3769	8.96395	9.55459	9.11667	9.3373	9.1084	9.01082	9.27002
chr17	33759992	33761870	17336172	NM_008997 // Rab11b // RAB11B, member RAS oncogene family // 17 B1|17 18.3 cM // 19326	Rab11b	NM_008997	NM_008997 // RefSeq // Mus musculus RAB11B, member RAS oncogene family (Rab11b), mRNA.		5.58328	5.95756	5.4961	5.57354	5.43571	5.06537	5.03668	5.60564	6.05692	5.45196	5.42751	5.02867	5.59069	5.23407	5.91005	5.42972	5.26956	5.71748	5.5048	5.55567	5.96848	5.16984	5.27127	5.78552	5.27022	5.54576	5.22943	5.48499	4.90663	6.13009	5.29427	5.35203	5.7259	5.31353	5.23558	5.35019	5.19879	5.22982	5.99155	5.60377	4.73068
chr17	12915701	12925067	17333323	ENSMUST00000151287 // Tcp1 // t-complex protein 1 // 17 A3-B|17 7.5 cM // 21454 /// NM_	Tcp1	ENSMUST00000151287	ENSMUST00000151287 // ENSEMBL // cdna:known chromosome:NCBIM37:17:13109248:13117933:1 g		10.6905	10.9453	11.0471	11.1689	10.9166	10.938	11.117	10.4473	10.632	11.0784	10.9409	11.0309	11.0904	10.8916	10.7382	11.1251	11.2873	10.7198	10.9964	11.0731	10.8129	10.9758	10.8763	10.7079	11.013	11.0161	11.0532	10.6997	11.2895	10.4811	11.0755	10.8382	11.1591	11.2003	10.9617	11.1718	10.9037	11.0356	11.2145	11.2036	10.9385
chr17	29318882	29329413	17335506	ENSMUST00000114701 // Pi16 // peptidase inhibitor 16 // 17|17 B1 // 74116 /// NM_023734	Pi16	ENSMUST00000114701	ENSMUST00000114701 // ENSEMBL // cdna:known chromosome:NCBIM37:17:29455827:29466358:1 g		6.911	7.21983	5.93544	6.09643	5.61807	6.00791	6.26047	7.27125	8.0758	5.39668	5.81745	6.45685	5.40176	6.74577	5.50891	6.22926	5.44449	6.84714	5.95677	5.90049	6.85575	5.52285	6.68571	5.43413	5.59921	6.39489	5.18553	6.98106	5.6754	7.40969	5.4082	5.62764	6.14837	8.42262	6.23236	5.19101	5.53167	5.18143	5.35818	5.74892	5.3337
chr17	28174315	28177391	17342827	ENSMUST00000043503 // Scube3 // signal peptide, CUB domain, EGF-like 3 // 17 A3.3|17 //	Scube3	ENSMUST00000043503	ENSMUST00000043503 // ENSEMBL // cdna:known chromosome:NCBIM37:17:28279261:28311797:1 g		7.92897	7.443	8.34725	8.44442	7.63725	7.93065	7.76789	7.1201	7.10106	7.64844	8.39727	8.63651	7.58155	7.83809	6.71294	8.1642	8.59756	6.39767	7.95671	7.71971	7.13221	8.14758	7.13433	7.71969	8.12409	8.38306	8.0136	7.77411	7.7701	7.04145	8.24243	7.7387	7.40213	8.39271	7.42382	7.87325	8.23479	7.99808	7.69854	7.3554	8.32826
chr17	35199381	35202007	17344309	NM_013693 // Tnf // tumor necrosis factor // 17 B1|17 19.06 cM // 21926 /// ENSMUST0000	Tnf	NM_013693	NM_013693 // RefSeq // Mus musculus tumor necrosis factor (Tnf), mRNA. // chr17 // 100		5.9291	5.56951	5.41922	5.88197	5.97675	5.576	5.34133	6.15544	6.05091	5.53074	5.59452	5.64978	5.64048	5.65281	5.66508	5.90072	5.62682	5.37367	5.40206	5.85908	5.84689	5.47674	5.67963	6.16861	5.47243	5.3844	5.49755	5.44219	5.46382	5.96519	5.482	5.43098	5.54684	5.67038	5.68019	5.18901	5.36873	5.36043	5.41635	5.41701	5.35492
chr17	6673458	6738044	17332932	NM_183368 // Sytl3 // synaptotagmin-like 3 // 17|17 A1 // 83672 /// NM_183370 // Sytl3	Sytl3	NM_183368	NM_183368 // RefSeq // Mus musculus synaptotagmin-like 3 (Sytl3), transcript variant 3,		6.4389	5.49427	5.41824	5.4286	5.45099	5.49707	5.35091	6.65308	6.70129	4.99787	5.95211	5.54127	5.43431	5.52178	5.87002	5.69093	5.05115	5.93759	5.08918	4.8156	6.79623	5.24711	6.32734	6.36617	5.44061	5.21483	5.33072	5.87419	5.37727	6.69061	5.38511	5.4527	5.54018	5.14201	5.5496	5.39721	5.19405	5.45423	5.36356	5.63678	4.87399
chr17	35262730	35398839	17337065	ENSMUST00000074806 // H2-Q2 // histocompatibility 2, Q region locus 2 // 17 B1|17 19.15	H2-Q2	ENSMUST00000074806	ENSMUST00000074806 // ENSEMBL // cdna:known chromosome:NCBIM37:17:35479187:35482739:1 g		6.43687	5.99254	5.97036	6.2061	5.98756	6.13164	5.82288	6.48656	7.02197	6.26378	6.01729	5.97477	6.07831	6.46905	6.61059	6.32607	6.21598	6.20732	6.22659	6.32787	7.57688	6.02211	6.33054	7.41743	6.26145	5.91826	6.08999	6.48415	5.96731	6.94018	6.0293	6.65368	6.1136	6.19199	6.06858	5.97644	6.0601	5.8079	5.84738	6.04438	5.79218
chr17	35025959	35028016	17344150	NM_023893 // Ng23 // Ng23 protein // 17 B1|17 // 78376 /// ENSMUST00000040151 // Ng23 /	Ng23	NM_023893	NM_023893 // RefSeq // Mus musculus Ng23 protein (Ng23), transcript variant 1, mRNA. //		6.62622	7.58604	7.15075	6.91875	7.26888	7.24499	7.50061	6.72276	7.05007	7.36595	7.31378	7.66167	7.34443	6.6854	7.53349	7.33526	6.32535	7.05259	7.17114	6.93894	7.05541	7.34201	6.99243	6.55257	7.34596	7.67868	6.70301	7.24266	7.57045	6.72021	7.01739	7.58171	7.55847	6.65409	7.39216	8.3084	6.93085	7.04379	8.59225	7.95782	6.30889
chr17	34269331	34287827	17343813	ENSMUST00000040655 // H2-Aa // histocompatibility 2, class II antigen A, alpha // 17 B1	H2-Aa	ENSMUST00000040655	ENSMUST00000040655 // ENSEMBL // cdna:known chromosome:NCBIM37:17:34419689:34424772:-1		7.77753	6.29142	6.53128	6.79117	6.11225	5.5486	5.75173	7.03693	8.52295	6.07594	4.79643	6.51059	5.64271	8.20711	5.62204	6.28081	6.49944	5.98578	5.83181	6.61469	8.23681	5.86096	7.0631	6.8839	6.12293	6.56093	5.85956	6.3122	7.04763	8.32856	7.07718	6.78849	6.41559	8.35182	6.52799	5.2172	5.17768	4.74529	5.45731	5.84631	5.48061
chr17	34670535	34719815	17336681	NM_031176 // Tnxb // tenascin XB // 17 B1|17 18.74 cM // 81877 /// ENSMUST00000168533 /	Tnxb	NM_031176	NM_031176 // RefSeq // Mus musculus tenascin XB (Tnxb), mRNA. // chr17 // 100 // 82 //		7.12321	6.00251	5.54559	5.66682	5.589	5.69289	5.66832	6.70946	7.0496	5.28863	5.63605	5.58357	5.68515	6.06821	6.02007	5.75849	5.65774	5.55768	5.45212	5.58037	6.27351	5.47408	6.42645	5.84256	5.72223	5.62559	5.46281	6.5657	5.42244	6.9739	5.61979	6.04179	5.62256	6.24261	5.71981	5.57048	5.57228	5.60972	5.54309	5.87905	5.60979
chr17	24175431	24205562	17341743	NM_001163852 // Tbc1d24 // TBC1 domain family, member 24 // 17 A3.3|17 // 224617 /// EN	Tbc1d24	NM_001163852	NM_001163852 // RefSeq // Mus musculus TBC1 domain family, member 24 (Tbc1d24), transcr		7.67144	7.92234	8.03281	8.27449	8.24151	8.1208	8.22334	7.89285	7.70361	8.0723	8.0319	8.15005	8.04831	8.25266	7.9775	8.68126	8.8776	8.16263	8.43476	8.13507	8.02711	8.16659	7.94482	8.48073	8.15196	8.29414	8.2509	8.53068	8.42998	8.02282	8.21157	7.78184	8.22596	8.25228	8.57048	8.37307	8.48205	8.47798	8.13222	8.14525	8.5538
chr17	32036100	32062865	17335902	ENSMUST00000081339 // Rrp1b // ribosomal RNA processing 1 homolog B (S. cerevisiae) //	Rrp1b	ENSMUST00000081339	ENSMUST00000081339 // ENSEMBL // cdna:known chromosome:NCBIM37:17:32173045:32199810:1 g		7.56315	7.88785	8.03033	7.84768	7.92124	7.67204	8.28869	7.56224	7.61356	8.67399	7.55129	8.04802	7.78873	7.96436	8.07687	8.12502	8.48782	7.73399	7.99952	8.0563	7.35193	7.7723	8.02868	7.56274	8.34665	8.49592	8.00503	7.92555	8.31648	7.4312	7.93932	7.95517	7.74315	8.13498	7.97546	8.20715	8.24077	8.00995	8.31875	8.38422	8.0214
chr17	12876034	12877842	17333320	NM_030726 // Mrgprh // MAS-related GPR, member H // 17 A1|17 // 80978 /// ENSMUST000000	Mrgprh	NM_030726	NM_030726 // RefSeq // Mus musculus MAS-related GPR, member H (Mrgprh), mRNA. // chr17		4.92827	4.63138	4.38603	4.38746	4.45616	4.50912	4.51411	4.75599	4.5335	4.64401	4.66311	4.60457	4.44837	4.84632	4.40092	4.54796	4.57659	4.7471	4.94443	4.45408	4.40254	4.13493	4.50272	4.61912	4.44167	4.51752	4.58457	4.47578	5.02848	5.33967	4.50241	4.55289	4.4735	4.52991	4.51903	4.51597	4.63576	4.59346	4.69442	4.28099	4.55727
chr17	10206471	10319380	17340756	NM_021881 // Qk // quaking // 17 A1|17 5.9 cM // 19317 /// ENSMUST00000042296 // Qk //	Qk	NM_021881	NM_021881 // RefSeq // Mus musculus quaking (Qk), transcript variant 3, mRNA. // chr17		9.42884	9.58109	9.79557	9.55015	10.1259	10.0163	9.58646	9.16089	8.64904	9.72363	10.2279	9.50921	9.78148	9.94003	9.6976	9.40173	10.18	9.65329	9.53006	10.0452	8.81667	10.1344	9.9436	9.08934	9.71693	9.28987	9.26101	9.62754	9.81682	8.9153	9.84357	9.92073	9.5813	10.3417	9.56291	9.84728	9.66861	9.31801	9.49357	9.5082	10.0897
chr17	35833920	35838306	17344444	NM_011655 // Tubb5 // tubulin, beta 5 class I // 17 B1|17 // 22154 /// ENSMUST000000015	Tubb5	NM_011655	NM_011655 // RefSeq // Mus musculus tubulin, beta 5 class I (Tubb5), mRNA. // chr17 //		12.6915	12.8804	12.7555	12.964	12.6825	12.846	12.8454	11.5473	12.0458	12.82	12.7957	12.7594	12.8595	12.7871	12.6701	12.8641	12.8415	12.7305	12.8471	12.7831	11.9374	12.7989	12.6153	12.323	12.7751	12.8827	12.7823	12.6575	12.8046	11.8244	12.7754	12.6959	12.9952	12.7205	12.7028	12.8455	12.6662	12.8796	12.7432	12.9106	12.6081
chr17	31059604	31059731	17335788	---		---	ENSMUST00000158997 // ENSEMBL // ncrna:rRNA chromosome:NCBIM37:17:31196549:31196676:1 g		4.40355	4.5071	5.18586	4.87804	4.76869	4.74145	5.36094	4.45743	4.90607	5.13118	5.29248	5.01523	4.78911	5.15292	4.36773	5.36412	5.23002	4.85012	5.35128	5.04945	5.32802	4.75949	4.99814	4.74254	4.953	5.3758	5.72882	5.32167	4.78824	3.74773	5.55657	5.54912	5.57987	5.10901	5.11387	4.91718	5.41227	5.39959	4.70025	4.81962	5.03907
chr17	21567046	21588697	17333946	NM_001002008 // Zfp948 // zinc finger protein 948 // 17 A3.2|17 // 381066 /// ENSMUST00	Zfp948	NM_001002008	NM_001002008 // RefSeq // Mus musculus zinc finger protein 948 (Zfp948), mRNA. // chr17		9.79342	10.2369	10.329	9.78479	10.1727	9.84808	10.1484	8.93784	9.1815	10.5351	9.98103	10.1044	10.1873	10.1828	10.269	9.67634	10.6136	10.3077	10.1901	9.93325	9.16054	10.0733	9.71054	9.30854	10.0817	10.196	9.96697	9.95896	10.066	8.87391	9.86833	10.356	10.0889	10.1866	10.1945	9.98729	10.1354	9.9707	10.1821	10.3712	10.0491
chr17	27579382	27623465	17342750	NM_019837 // Nudt3 // nudix (nucleotide diphosphate linked moiety X)-type motif 3 // 17	Nudt3	NM_019837	NM_019837 // RefSeq // Mus musculus nudix (nucleotide diphosphate linked moiety X)-type		10.0677	10.2001	10.3553	10.4171	9.83574	10.2301	10.1534	9.61475	9.43484	10.105	10.3742	10.3039	10.2604	10.2135	10.0053	10.337	10.5676	9.88298	10.2894	10.2682	9.53248	10.3912	9.9585	9.64515	10.155	10.0756	9.98468	9.8912	10.0355	9.26546	10.298	9.91206	10.3158	10.3817	9.91049	10.2312	9.94772	10.4636	10.1292	10.1447	10.2097
chr17	24038144	24045954	17334192	NM_175440 // Prss27 // protease, serine, 27 // 17 A3.3|17 10.6 cM // 213171 /// ENSMUST	Prss27	NM_175440	NM_175440 // RefSeq // Mus musculus protease, serine, 27 (Prss27), mRNA. // chr17 // 10		6.5309	6.21581	6.04537	5.59162	5.88782	5.91711	5.89229	6.39992	7.73939	5.8677	6.1252	5.86439	6.06801	5.8688	6.3236	5.89865	6.04766	5.91723	5.51318	6.05455	7.16349	6.09484	6.64389	6.81085	5.85195	5.59949	6.18323	6.00716	5.84643	6.93567	5.89899	6.41553	5.92645	6.66225	6.40008	5.75513	5.79149	5.82379	5.5679	6.16913	5.9382
chr17	33819027	33824562	17343643	ENSMUST00000087342 // Rps28 // ribosomal protein S28 // 17 B1|17 // 54127 /// ENSMUST00	Rps28	ENSMUST00000087342	ENSMUST00000087342 // ENSEMBL // cdna:known chromosome:NCBIM37:17:33959981:33961507:-1		6.26576	6.01065	6.74373	6.08681	6.47547	6.10044	6.59282	6.01474	6.2565	6.5098	6.44101	6.40596	6.3565	6.31157	6.65952	6.36719	6.87757	6.12235	6.69589	6.56672	6.3311	6.28462	6.05364	6.38964	6.31023	6.68662	6.80959	6.27981	6.57545	6.03006	6.58935	6.34867	6.57316	6.6616	6.2907	6.68078	6.57807	6.67064	6.74488	6.37001	6.17124
chr17	25718926	25727419	17342308	ENSMUST00000048054 // Chtf18 // CTF18, chromosome transmission fidelity factor 18 // 17	Chtf18	ENSMUST00000048054	ENSMUST00000048054 // ENSEMBL // cdna:known chromosome:NCBIM37:17:25855871:25864364:-1		7.90882	8.01583	8.21859	8.07368	8.34276	8.37337	8.19881	6.61277	7.49933	8.31292	8.40312	8.56463	8.22696	7.9162	8.49607	8.32043	8.32478	8.33758	8.2515	8.14585	7.74132	8.17444	7.64108	7.98703	8.11607	8.51023	8.15582	7.68103	8.24813	7.04337	8.26279	7.72861	8.25633	8.40716	7.81136	8.23527	7.91203	8.25649	8.09181	8.19539	8.12347
chr17	6270475	6305783	17332893	NM_001033178 // Tmem181a // transmembrane protein 181A // 17 A1|17 // 77106 /// ENSMUST	Tmem181a	NM_001033178	NM_001033178 // RefSeq // Mus musculus transmembrane protein 181A (Tmem181a), mRNA. //		10.6802	10.9258	11.0035	10.9428	10.8541	11.3116	10.9835	10.054	10.5582	10.9605	11.3564	11.1939	11.3149	10.9375	11.1887	11.0123	11.3496	11.0105	11.3823	10.9122	10.6631	11.1022	10.6734	10.7524	10.9719	10.845	11.0844	10.5847	10.8862	10.6706	11.5011	11.1091	11.2639	11.0735	10.0356	11.2532	11.2701	11.0715	10.8993	10.7461	10.812
chr17	29660595	29705979	17335579	ENSMUST00000024816 // Ftsjd2 // FtsJ methyltransferase domain containing 2 // 17 A3.3|1	Ftsjd2	ENSMUST00000024816	ENSMUST00000024816 // ENSEMBL // cdna:known chromosome:NCBIM37:17:29797540:29842924:1 g		8.82387	9.02788	9.01573	8.59297	8.6898	8.73204	8.85635	8.95874	9.10608	8.73855	8.84357	8.84628	8.7962	8.71029	8.93049	9.00938	9.0358	8.85049	8.97951	8.88613	9.35912	8.80676	8.82496	9.46424	8.85709	8.95935	8.79996	8.69033	8.76414	8.99113	8.90645	8.9587	8.864	9.03269	9.06982	8.98168	8.82652	8.85605	8.78605	8.96996	8.66021
chr17	23771841	23777763	17334123	---		---	ENSMUST00000147774 // ENSEMBL // cdna:known chromosome:NCBIM37:17:23908808:23914730:1 g		4.68072	4.93307	4.87736	4.88753	4.80696	5.13912	5.13433	4.5533	4.25225	5.12891	4.88661	5.26429	4.83932	4.84487	5.1305	4.43412	5.06736	4.72867	4.88478	4.71771	4.20467	4.86775	4.83262	3.86608	4.91405	4.90185	5.23547	4.90549	4.87065	4.41258	4.93211	5.1473	4.88489	5.03554	4.81534	4.8866	5.22467	5.10573	4.98158	5.07444	4.62298
chr17	28207778	28228608	17335281	NM_027185 // Def6 // differentially expressed in FDCP 6 // 17 A3.3|17 // 23853 /// ENSM	Def6	NM_027185	NM_027185 // RefSeq // Mus musculus differentially expressed in FDCP 6 (Def6), mRNA. //		6.46666	6.94586	6.59832	7.02667	6.14679	6.95861	6.51723	7.40855	7.37641	6.44239	6.98857	6.78015	6.09537	6.61171	7.12854	6.42629	7.09578	6.2074	6.22165	6.86078	7.35755	6.59683	6.41079	7.65203	6.50722	5.93066	5.96021	6.33573	5.84323	6.9635	6.38348	7.07665	6.59712	6.76785	6.50132	6.29903	6.44653	6.05111	6.21859	5.89956	6.59174
chr17	6798383	6827990	17340626	XR_141765 // LOC100862483 // uncharacterized LOC100862483 // --- // 100862483	LOC100862483	XR_141765	AK037830 // GenBank HTC // Mus musculus 16 days neonate thymus cDNA, RIKEN full-length		6.0739	6.94208	6.80019	6.60493	6.3902	6.60822	6.54601	6.24103	5.93236	6.66148	6.92007	6.46052	6.63411	6.22585	6.52084	7.0944	6.74575	6.46993	6.63061	6.50204	5.86028	6.84817	6.21209	6.08224	6.57728	6.73674	6.6742	6.41646	6.4738	5.9323	6.77196	6.5969	6.74575	6.49092	7.16403	6.8085	6.88461	6.76002	6.7966	6.74181	7.09607
chr17	34187553	34197225	17336432	NM_013683 // Tap1 // transporter 1, ATP-binding cassette, sub-family B (MDR/TAP) // 17	Tap1	NM_013683	NM_013683 // RefSeq // Mus musculus transporter 1, ATP-binding cassette, sub-family B (		8.88629	8.25241	8.29664	8.43789	8.09648	8.3854	7.66274	9.27802	10.0054	8.12646	8.73395	8.6196	8.28562	8.61471	8.94597	8.86581	8.4418	8.20262	7.69854	8.9368	10.6809	8.54477	8.38031	10.8465	7.75063	8.06387	7.68399	9.01922	8.03171	9.95717	7.35879	9.20529	7.69049	8.8707	7.65138	8.48333	7.46821	7.70063	7.25751	7.70804	6.9612
chr17	33329342	33358878	17343559	ENSMUST00000054072 // Zfp81 // zinc finger protein 81 // 17 B1|17 // 224694 /// NM_2075	Zfp81	ENSMUST00000054072	ENSMUST00000054072 // ENSEMBL // cdna:known chromosome:NCBIM37:17:33466287:33495823:-1		8.02683	8.6118	9.01054	8.75942	8.47427	8.20871	8.93447	6.72904	7.14031	8.47794	8.43362	8.67141	8.44869	8.94253	7.73452	8.41074	9.49908	8.06225	8.57961	9.04963	7.38887	8.65946	8.17121	7.56479	9.13698	8.81036	9.01114	8.3784	9.39732	7.47312	8.86847	8.48004	8.86119	9.19543	8.58672	9.19207	8.72598	8.97902	9.25533	8.92829	9.37764
chr17	8165501	8196804	17333050	ENSMUST00000097419 // Fgfr1op // Fgfr1 oncogene partner // 17 A1|17 // 75296 /// NM_001	Fgfr1op	ENSMUST00000097419	ENSMUST00000097419 // ENSEMBL // cdna:known chromosome:NCBIM37:17:8358366:8389669:1 gen		7.12982	7.88315	8.04913	7.36332	7.75543	7.8288	7.9434	7.23567	7.5493	8.42354	7.95126	8.45099	8.04453	7.80754	8.43359	7.7956	8.3742	7.80537	8.16088	7.85235	7.85514	7.89014	7.59415	7.87586	7.78716	8.01071	8.11144	7.72105	7.94249	7.5088	8.43808	7.74073	8.16835	8.06557	7.85619	8.22413	7.9575	8.15433	7.73796	7.64827	8.50552
chr17	32536558	32551798	17335966	ENSMUST00000169591 // Cyp4f16 // cytochrome P450, family 4, subfamily f, polypeptide 16	Cyp4f16	ENSMUST00000169591	ENSMUST00000169591 // ENSEMBL // cdna:known chromosome:NCBIM37:17:32673503:32688743:1 g		6.27132	6.73399	6.66039	6.33155	6.0434	6.29241	6.13978	6.40053	7.26946	6.63611	6.48567	6.14598	6.1754	6.74116	6.57495	6.08213	6.68325	6.89388	6.21221	6.43731	6.90208	6.43772	6.30696	6.75573	6.05621	6.12938	6.54522	6.44427	5.9376	6.91415	6.32172	6.67507	6.10873	6.74556	5.43185	6.18836	6.04507	6.06251	6.43374	6.2309	6.62298
chr17	30624354	30875264	17335628	NM_013811 // Dnahc8 // dynein, axonemal, heavy chain 8 // 17 A3.3|17 // 13417 /// ENSMU	Dnahc8	NM_013811	NM_013811 // RefSeq // Mus musculus dynein, axonemal, heavy chain 8 (Dnahc8), mRNA. //		5.21681	4.83117	4.89493	5.22297	5.38717	6.8787	6.64797	5.81404	4.97795	5.84206	6.31314	5.84519	5.72406	5.26937	7.30976	6.45293	5.29748	5.37373	6.00382	5.78092	6.13115	5.25262	5.14723	6.68092	5.35059	5.28707	5.02805	5.83713	6.58305	5.06036	6.27317	5.16389	5.12015	5.17909	5.6916	6.50378	5.46463	5.39266	4.95079	5.05307	5.08152
chr17	29032660	29043372	17335459	NR_036613 // Srsf3 // serine/arginine-rich splicing factor 3 // 17 A3.3|17 11.0 cM // 2	Srsf3	NR_036613	NR_036613 // RefSeq // Mus musculus serine/arginine-rich splicing factor 3 (Srsf3), tra		10.3985	10.2953	10.4795	10.6551	10.3587	10.3099	10.5858	9.79061	10.1583	10.5101	10.4251	10.579	10.5365	10.5964	10.3979	10.3872	11.014	10.2854	10.6546	10.519	9.95414	10.5509	10.3245	10.3868	10.5779	10.4718	10.7173	10.6156	10.5295	10.195	10.6479	10.5391	10.6688	10.7209	10.5928	10.5681	10.6485	10.5814	10.4513	10.6396	10.723
chr17	6601671	6609679	17332923	NM_001199948 // Dynlt1f // dynein light chain Tctex-type 1F // 17 A1|17 // 100040531 //	Dynlt1f	NM_001199948	NM_001199948 // RefSeq // Mus musculus dynein light chain Tctex-type 1F (Dynlt1f), tran		11.0437	11.1512	11.0841	11.1878	10.9508	11.0453	11.1294	10.2288	10.7096	10.8561	11.1035	11.1796	10.9965	11.1098	10.9968	11.2194	11.3097	11.0348	10.9788	10.8583	10.4997	11.017	10.847	11.0076	11.1002	11.0729	11.2143	11.0909	11.1446	10.6409	11.0959	11.2141	11.1313	11.1382	10.7831	11.1245	11.0908	11.2859	11.1681	11.1548	11.2186
chr17	32390659	32403583	17343426	NM_178785 // Rasal3 // RAS protein activator like 3 // 17 B1|17 // 320484 /// ENSMUST00	Rasal3	NM_178785	NM_178785 // RefSeq // Mus musculus RAS protein activator like 3 (Rasal3), mRNA. // chr		6.09342	5.88374	5.84841	6.00635	5.77942	5.62408	5.80499	6.04619	6.05955	5.69255	5.78302	5.81656	5.66337	5.72314	5.73444	5.51071	5.8511	6.03219	5.60099	6.01166	5.9553	5.62609	5.93203	6.2095	5.81001	5.72548	5.56493	5.76276	5.77187	5.94645	5.9669	5.90019	5.74626	5.96475	6.06271	5.83627	5.49579	5.61055	5.52345	5.74378	5.43312
chr17	35135178	35147322	17336987	NM_057171 // Bag6 // BCL2-associated athanogene 6 // 17 B1|17 19.03 cM // 224727 /// NM	Bag6	NM_057171	NM_057171 // RefSeq // Mus musculus BCL2-associated athanogene 6 (Bag6), transcript var		9.92676	9.9788	9.95294	9.99509	10.1245	10.2159	9.93571	9.53151	9.51621	10.1403	9.95242	10.1833	10.0808	9.95506	10.1908	10.0033	10.1304	10.085	10.0205	9.98477	9.63488	9.91721	9.7802	9.68649	9.96114	10.0588	9.91027	9.63284	9.78258	9.38262	9.94484	9.859	10.0617	10.1362	9.99524	10.1755	10.0041	10.1164	10.0524	10.1513	9.9638
chr17	23673608	23675524	17334091	ENSMUST00000024697 // Hcfc1r1 // host cell factor C1 regulator 1 (XPO1-dependent) // 17	Hcfc1r1	ENSMUST00000024697	ENSMUST00000024697 // ENSEMBL // cdna:known chromosome:NCBIM37:17:23810575:23812491:1 g		8.03447	7.63684	7.68713	7.54459	7.74979	7.56215	7.43533	8.40024	8.36162	7.72565	7.47997	7.78722	7.4465	7.48628	8.03254	7.85589	7.92903	7.46201	7.68373	7.89324	8.16044	7.76749	7.67061	8.18044	7.68501	7.69348	7.50184	7.74071	7.39384	7.92356	7.54615	7.41349	7.75413	7.56607	7.89553	7.73531	7.19506	7.62875	7.64329	7.78841	7.47726
chr17	32950961	32965716	17343521	NR_033585 // Cyp4f41-ps // cytochrome P450, family 4, subfamily f, polypeptide 41 pseud	Cyp4f41-ps	NR_033585	NR_033585 // RefSeq // Mus musculus cytochrome P450, family 4, subfamily f, polypeptide		4.43231	4.40686	4.37341	4.78502	4.51228	4.30997	4.43279	4.44715	5.02047	4.16024	4.08501	4.30592	4.11483	4.13322	4.6886	4.10851	4.32138	4.24394	4.22899	4.53288	5.16572	4.2129	4.47908	4.85938	4.25644	4.00726	4.08807	3.99113	4.34693	4.79657	4.21606	4.10135	4.27584	4.57344	4.15204	3.88891	4.54823	4.35704	4.22979	4.48727	4.53288
chr17	34153072	34160229	17336422	ENSMUST00000114232 // H2-DMb1 // histocompatibility 2, class II, locus Mb1 // 17 B1|17	H2-DMb1	ENSMUST00000114232	ENSMUST00000114232 // ENSEMBL // cdna:known chromosome:NCBIM37:17:34290017:34297168:1 g		4.56447	4.62266	4.47219	4.53714	4.38614	4.51981	4.52754	4.8573	5.11284	4.27029	4.74142	4.38591	4.41737	4.53035	4.67067	4.6078	4.66227	4.55407	4.40904	4.69497	4.73631	4.04667	4.26847	4.68103	4.39456	4.28097	4.64705	4.62258	4.56326	4.74434	4.54493	4.7054	4.41092	4.47574	4.31644	4.46888	4.25887	4.3592	4.05169	4.30217	4.58862
chr17	21423227	21435640	17333913	ENSMUST00000165230 // Zfp54 // zinc finger protein 54 // 17 A3.2|17 9.9 cM // 22712 ///	Zfp54	ENSMUST00000165230	ENSMUST00000165230 // ENSEMBL // cdna:known chromosome:NCBIM37:17:21560191:21572604:1 g		5.82827	5.36932	5.91853	5.33329	5.50719	4.91116	5.4807	6.10734	6.30127	5.84293	5.51217	6.24292	4.9187	6.08134	4.97224	5.65117	6.04811	5.70131	5.35378	6.2109	6.78769	5.71178	5.4974	6.79379	6.85401	5.11834	6.23942	5.88375	5.88794	6.48685	6.16293	5.52336	5.09531	6.15065	5.33897	5.83782	5.79077	5.68039	5.75724	5.281	5.96008
chr17	34823993	34836945	17344021	ENSMUST00000077477 // Stk19 // serine/threonine kinase 19 // 17 B1|17 // 54402 /// NM_0	Stk19	ENSMUST00000077477	ENSMUST00000077477 // ENSEMBL // cdna:known chromosome:NCBIM37:17:34960938:34973890:-1		7.85743	8.0525	7.7313	7.79022	7.72433	7.75182	7.5581	7.80403	7.95093	7.88049	7.76988	7.69649	7.72152	7.50356	7.96005	7.7258	7.93632	7.89649	7.77744	7.92117	7.94242	7.75104	7.60889	7.94286	7.59295	7.81944	7.62837	7.50056	7.84053	7.81166	7.84838	7.59277	7.9024	7.70447	7.58086	7.81054	7.67299	7.69929	8.06891	8.15884	7.49181
chr17	35439155	35443773	17337133	NM_010394 // H2-Q7 // histocompatibility 2, Q region locus 7 // 17 B1|17 19.19 cM // 15	H2-Q7	NM_010394	NM_010394 // RefSeq // Mus musculus histocompatibility 2, Q region locus 7 (H2-Q7), tra		7.6074	5.6812	6.40123	7.0618	6.34031	6.56189	5.71269	6.59298	7.78998	5.7751	6.25263	7.13084	6.11479	6.3841	7.84422	6.66217	6.20262	6.8006	5.87101	7.46633	9.2868	6.60003	6.40244	9.43656	6.15262	5.54809	5.89395	6.68216	6.86664	8.56106	6.02404	6.95822	6.6912	7.09861	5.84698	6.37465	6.16959	5.70863	5.50476	5.54867	5.77026
chr17	35397479	35397595	17337120	NM_010394 // H2-Q7 // histocompatibility 2, Q region locus 7 // 17 B1|17 19.19 cM // 15	H2-Q7	NM_010394	NM_010394 // RefSeq // Mus musculus histocompatibility 2, Q region locus 7 (H2-Q7), tra		10.4891	8.9049	9.43649	8.8737	9.73478	9.20679	8.4144	9.35977	10.7771	9.12165	9.14125	9.61374	8.98549	9.61326	10.4532	9.09816	9.27089	9.40089	9.19866	9.99128	11.7056	9.73358	9.94921	11.3349	8.26336	8.70765	8.81273	9.62606	9.24333	10.8857	8.70352	9.8512	9.15929	9.61147	7.99525	9.33966	8.42139	8.55363	8.36623	8.83026	8.03796
chr17	6439002	6490378	17340548	NR_033520 // Tmem181b-ps // transmembrane protein 181B, pseudogene // 17 A1|17 // 54712	Tmem181b-ps	NR_033520	NR_033520 // RefSeq // Mus musculus transmembrane protein 181B, pseudogene (Tmem181b-ps		9.43184	9.27238	9.76709	9.23532	9.65662	9.88541	9.38979	8.42751	8.67313	8.91699	10.1524	10.4229	9.81542	10.0987	8.41004	9.68908	10.4454	9.34068	10.0451	9.56686	9.09943	9.58087	8.8615	9.05377	9.89854	9.68859	10.3394	9.79431	9.94563	8.817	10.2555	10.1015	10.1788	9.90249	6.8757	10.1661	10.6075	10.134	9.26741	9.39377	9.77604
chr17	35000907	35016329	17336838	NM_011690 // Vars // valyl-tRNA synthetase // 17 B1|17 19.02 cM // 22321 /// ENSMUST000	Vars	NM_011690	NM_011690 // RefSeq // Mus musculus valyl-tRNA synthetase (Vars), nuclear gene encoding		8.99899	9.1876	9.02203	8.83584	9.07384	8.92346	8.78293	8.31556	9.62735	9.3381	8.80074	8.60911	9.18675	8.72067	9.61756	8.76055	9.18342	9.33597	8.97258	9.15549	9.23985	9.0103	8.92628	9.48214	8.45056	8.86533	8.31883	8.29589	9.00387	9.03837	8.59034	8.30059	9.04123	8.83904	9.11336	9.11724	8.60522	8.76924	9.32881	9.35277	8.46596
chr17	23173869	23193252	17341455	NM_009555 // Zfp40 // zinc finger protein 40 // 17 A3.3|17 10.05 cM // 22700 /// ENSMUS	Zfp40	NM_009555	NM_009555 // RefSeq // Mus musculus zinc finger protein 40 (Zfp40), mRNA. // chr17 // 1		7.03652	7.48263	7.87147	6.82128	7.39277	6.93288	7.90157	6.7942	6.34631	6.96077	6.82489	7.76908	6.80141	7.65469	5.94112	7.96407	8.73898	6.84163	7.29068	7.94776	6.1113	7.62795	6.94607	6.5285	8.02252	7.74412	7.8074	7.11015	7.73407	6.38226	7.86802	7.00568	7.1647	8.11494	6.8264	7.74687	7.54068	7.70472	7.87491	7.74499	8.43794
chr17	24715839	24718057	17342018	NM_026205 // Rnf151 // ring finger protein 151 // 17 A3.3|17 // 67504 /// ENSMUST000000	Rnf151	NM_026205	NM_026205 // RefSeq // Mus musculus ring finger protein 151 (Rnf151), mRNA. // chr17 //		5.53828	5.68862	5.71431	5.27721	5.69301	5.59245	6.1092	5.23004	5.19846	5.77154	5.70602	5.54821	5.94649	5.70217	5.3593	5.57772	6.07869	5.6129	5.28993	5.6735	5.28541	5.71711	5.34787	5.48323	5.79986	5.73866	5.95338	5.18539	5.83252	4.98737	5.48451	5.55665	5.51232	5.76188	5.72636	5.88948	5.83352	5.79101	5.69144	5.3468	5.48269
chr17	6147419	6147540	17332891	---		---	ENSMUST00000104601 // ENSEMBL // ncrna:rRNA chromosome:NCBIM37:17:6147419:6147540:1 gen		7.77935	8.43841	8.86691	8.21294	8.65538	8.58251	8.84989	7.24496	7.93004	8.38837	8.87543	8.76175	8.73948	8.98394	6.05702	8.70525	9.13085	7.3785	8.67331	8.21468	8.2404	9.00834	8.1969	7.96806	9.2813	9.06905	9.13675	8.53815	8.89215	8.39865	9.37962	8.40914	8.49383	9.40076	8.97757	9.04221	9.30852	8.58238	8.59635	8.24408	9.07501
chr17	23917458	23919441	17334178	NM_001077633 // Dcpp3 // demilune cell and parotid protein 3 // 17 A3.3|17 // 620253 //	Dcpp3	NM_001077633	NM_001077633 // RefSeq // Mus musculus demilune cell and parotid protein 3 (Dcpp3), mRN		7.42445	5.72455	6.22293	4.93994	6.03332	6.13399	6.18447	6.58161	6.35681	5.99495	6.20453	6.50028	5.76848	6.22708	6.25162	6.61789	6.51389	6.52545	5.6022	6.17964	6.62552	6.2071	6.39174	6.1262	6.37272	5.63317	6.47076	6.23007	5.93289	8.2958	5.94059	6.29987	6.57614	6.10067	6.48606	6.01535	6.33911	6.15981	6.02973	6.3987	6.13472
chr17	30622441	30626905	17343153	NR_045287 // 1700097N02Rik // RIKEN cDNA 1700097N02 gene // 17 A3.3|17 // 67522	1700097N02Rik	NR_045287	NR_045287 // RefSeq // Mus musculus RIKEN cDNA 1700097N02 gene (1700097N02Rik), non-cod		7.09381	7.0746	7.12908	7.55213	7.32081	7.4862	7.47713	7.04212	6.73857	7.0694	7.71684	7.11128	7.42676	7.04764	7.5827	7.1665	7.29051	7.03994	7.36205	6.90518	6.5431	6.75339	7.11882	7.02729	6.86323	6.9654	7.0747	7.31298	7.39925	7.1743	7.36932	7.00203	7.07155	7.02734	7.29307	7.38228	7.18473	7.12864	7.09036	6.89938	6.75127
chr17	8525372	8986648	17333133	NM_011866 // Pde10a // phosphodiesterase 10A // 17 A1|17 // 23984 /// ENSMUST0000008908	Pde10a	NM_011866	NM_011866 // RefSeq // Mus musculus phosphodiesterase 10A (Pde10a), mRNA. // chr17 // 1		6.57101	7.93546	7.76235	7.51184	7.96385	7.46959	7.73187	6.11798	6.16871	8.48185	7.36495	7.54965	7.33104	8.16173	8.55522	7.58271	8.7157	7.69475	7.87842	7.91492	6.17939	7.7153	8.09494	5.95983	8.0284	8.51244	6.57376	8.20586	8.47831	5.74853	7.17398	7.97239	7.03273	8.51986	7.9355	6.54324	7.33427	7.34462	7.73741	8.43196	8.33235
chr17	26081211	26090329	17342581	ENSMUST00000040907 // Decr2 // 2-4-dienoyl-Coenzyme A reductase 2, peroxisomal // 17 B1	Decr2	ENSMUST00000040907	ENSMUST00000040907 // ENSEMBL // cdna:known chromosome:NCBIM37:17:26218156:26227245:-1		9.5156	9.00874	9.20698	9.25619	8.65969	8.66051	8.82952	10.3204	10.2789	8.84052	8.72271	9.14454	8.21022	9.14361	8.42144	9.63051	9.58096	8.3219	8.73573	9.03499	10.1651	8.89236	9.2639	10.1944	9.46236	9.23501	9.21543	9.22425	9.24208	10.3059	9.04737	9.17948	9.0302	9.4546	7.70586	8.77863	8.84608	8.99724	8.89093	8.53383	8.89523
chr17	34952013	34952075	17344122	---		---	ENSMUST00000174039 // ENSEMBL // cdna:known chromosome:NCBIM37:17:35087187:35089379:-1		9.17429	9.45124	9.01577	10.0981	9.80421	9.316	9.38541	8.14925	8.67899	9.49421	9.36862	9.47398	9.67394	9.23881	10.085	9.58699	9.64271	9.5234	9.79103	9.41429	8.76876	9.29688	9.46599	8.90176	8.95957	9.37938	9.43905	9.32182	9.31757	8.99522	9.46948	8.72243	9.6822	9.28428	9.25243	9.52342	9.67834	9.40514	9.77171	9.37983	9.24091
chr17	28951950	28969549	17335441	NM_025888 // Kctd20 // potassium channel tetramerisation domain containing 20 // 17 A3.	Kctd20	NM_025888	NM_025888 // RefSeq // Mus musculus potassium channel tetramerisation domain containing		8.96937	9.14327	9.12397	8.97215	8.84995	9.21335	8.96585	8.29959	8.25723	8.94095	9.18454	9.00476	9.3313	8.90076	9.05207	9.12005	9.62856	8.90791	9.38944	9.08617	8.60312	8.94799	8.78556	8.6031	8.90488	8.70798	9.05253	8.67498	8.82123	8.21559	9.32088	8.76384	9.35265	9.23678	9.13216	9.35928	8.90572	9.32921	8.99562	9.02588	9.05989
chr17	10456216	10493055	17333192	---		---	ENSMUST00000159422 // ENSEMBL // cdna:known chromosome:NCBIM37:17:10649088:10666625:1 g		4.40197	4.56296	4.18754	4.04601	4.4041	4.10273	4.31051	4.24576	4.24874	4.10025	4.14802	4.64564	4.18677	4.37708	4.23277	3.73728	4.18725	4.11363	4.15682	4.27162	4.23981	4.2269	4.42301	4.2144	4.08775	4.08463	4.25134	4.14337	4.57172	4.4938	4.24524	4.25743	4.22878	4.30738	4.27228	4.04693	4.14298	4.2339	4.21173	4.7047	4.08936
chr17	17843326	17855188	17341269	NM_008215 // Has1 // hyaluronan synthase1 // 17 A3.2|17 10.0 cM // 15116 /// ENSMUST000	Has1	NM_008215	NM_008215 // RefSeq // Mus musculus hyaluronan synthase1 (Has1), mRNA. // chr17 // 100		5.42919	5.98496	5.56893	5.53409	6.42817	6.62831	7.50612	5.42762	5.24786	7.78329	6.41992	5.75486	6.46595	6.29796	5.89349	5.36962	5.68869	5.82939	7.08494	6.75688	5.49903	6.54025	6.29455	5.27081	6.05033	7.05732	6.51148	6.03685	7.34086	5.8761	5.74969	6.33295	6.25766	5.68985	5.87608	5.50854	5.50646	5.54708	5.65231	6.29899	5.59609
chr17	35834802	35836045	17548000	NM_011655 // Tubb5 // tubulin, beta 5 class I // 17 B1|17 // 22154 /// ENSMUST000000015	Tubb5	NM_011655	NM_011655 // RefSeq // Mus musculus tubulin, beta 5 class I (Tubb5), mRNA. // chr17 //		7.53327	7.08639	8.03992	7.84169	7.52023	8.47241	7.63967	6.27948	6.69797	7.6365	8.66892	7.07901	8.9684	7.4032	7.97223	7.57761	7.81947	7.33032	8.16081	7.74049	6.80819	7.82585	7.00154	6.95539	7.73695	7.66146	7.45028	6.81321	8.17549	6.48535	7.81067	7.50101	8.1918	7.4312	7.35896	7.71709	7.13991	7.81201	6.78946	7.91246	7.50599
chr17	25242659	25256364	17342182	NM_001163270 // Baiap3 // BAI1-associated protein 3 // 17 A3.3|17 // 545192 /// ENSMUST	Baiap3	NM_001163270	NM_001163270 // RefSeq // Mus musculus BAI1-associated protein 3 (Baiap3), mRNA. // chr		7.18767	7.25344	6.86824	7.22367	6.9821	8.17778	7.00987	6.77192	6.30206	6.70739	7.99872	8.04481	7.34741	6.71354	8.7468	7.01857	6.82135	6.92704	7.12648	7.03868	6.32011	7.75158	6.70607	6.6987	6.20097	6.30403	6.70005	6.59866	6.66812	6.54356	7.20216	7.873	7.08343	6.95454	6.94856	6.92977	6.78688	6.7401	6.55668	6.48283	7.001
chr17	33949912	33951488	17343688	NM_019420 // B3galt4 // UDP-Gal:betaGlcNAc beta 1,3-galactosyltransferase, polypeptide	B3galt4	NM_019420	NM_019420 // RefSeq // Mus musculus UDP-Gal:betaGlcNAc beta 1,3-galactosyltransferase,		6.26215	6.04027	6.08838	5.98793	6.16093	6.17909	5.79041	6.28932	6.6088	5.78733	6.12361	5.83395	6.08231	6.13353	5.74994	5.80899	6.35113	5.81329	6.16718	6.02544	6.30778	5.72357	6.04519	6.50006	5.5114	5.92221	5.58675	5.99117	6.15168	6.30467	5.9025	5.84868	6.00849	5.88095	5.8775	6.12975	5.89535	5.99127	5.97388	6.11395	5.87711
chr17	27122663	27133916	17342689	NM_026063 // 2900010M23Rik // RIKEN cDNA 2900010M23 gene // 17|17 B1 // 67267 /// ENSMU	2900010M23Rik	NM_026063	NM_026063 // RefSeq // Mus musculus RIKEN cDNA 2900010M23 gene (2900010M23Rik), mRNA. /		9.73038	9.01701	9.18465	10.1299	8.92864	9.45653	9.17107	8.54546	8.51779	9.04507	9.34777	9.58095	8.87669	9.15078	9.02928	9.47647	9.81123	8.87948	9.24692	9.33567	8.40972	9.56685	8.99307	8.63713	9.22233	9.12154	9.31097	9.17107	9.38763	8.25702	9.21718	8.77893	9.83292	9.29023	9.27298	9.18258	9.19907	9.26469	9.22842	8.9046	9.08243
chr17	12419972	12507704	17340817	NM_011395 // Slc22a3 // solute carrier family 22 (organic cation transporter), member 3	Slc22a3	NM_011395	NM_011395 // RefSeq // Mus musculus solute carrier family 22 (organic cation transporte		6.04228	5.72105	5.47928	4.93382	5.32381	5.45639	5.25279	5.93013	5.6825	5.34796	5.59591	5.48297	5.34885	6.43042	5.40132	4.92108	5.51612	6.13324	5.23175	5.24524	5.35298	5.44599	6.57002	5.02035	5.37074	5.90284	5.23062	5.2483	5.13743	5.8492	5.31803	5.55883	5.52383	5.79311	5.24308	5.2339	5.55981	5.2156	5.3806	5.24624	5.17559
chr17	23679365	23682446	17334097	NM_018777 // Cldn6 // claudin 6 // 17 A3.3|17 // 54419 /// ENSMUST00000024699 // Cldn6	Cldn6	NM_018777	NM_018777 // RefSeq // Mus musculus claudin 6 (Cldn6), mRNA. // chr17 // 100 // 100 //		7.18586	4.95905	4.9627	5.01114	5.02243	4.88653	4.81224	5.0861	5.1252	4.67875	4.66618	4.92285	4.86349	4.86053	4.98507	6.12936	4.64775	5.91466	4.94207	4.79286	4.86795	4.43775	5.16171	4.88758	5.54922	4.91516	5.09517	4.67256	4.93392	5.24334	5.03291	4.75478	4.86706	4.84949	5.35026	4.79718	5.22299	4.82932	4.91547	4.96501	4.59988
chr17	25057702	25081181	17342133	ENSMUST00000024984 // Tmem204 // transmembrane protein 204 // 17 A3.3|17 // 407831 ///	Tmem204	ENSMUST00000024984	ENSMUST00000024984 // ENSEMBL // cdna:known chromosome:NCBIM37:17:25194647:25218126:-1		6.17459	5.85633	5.80651	6.22247	6.25385	5.81871	6.10909	6.60195	6.52944	5.94652	5.70242	6.26426	6.03875	5.93159	5.93641	6.01657	5.98528	5.95256	5.77575	6.00749	6.06541	6.00946	6.48637	6.44819	5.83932	5.95102	5.95834	6.27403	5.98084	6.29274	6.21918	6.01782	6.05143	6.17804	6.04114	5.7254	6.0033	6.10954	5.99108	5.92193	5.75808
chr17	25565892	25570686	17342298	NM_011447 // Sox8 // SRY-box containing gene 8 // 17 A3.3|17 8.0 cM // 20681 /// ENSMUS	Sox8	NM_011447	NM_011447 // RefSeq // Mus musculus SRY-box containing gene 8 (Sox8), mRNA. // chr17 //		6.36656	6.50488	6.37554	6.25449	6.67454	6.93863	7.73827	6.57562	6.12529	7.10155	6.50192	6.9679	6.6441	6.15578	7.0446	7.07708	6.30185	6.47907	6.70132	6.89757	6.18042	6.55681	6.90812	6.4893	6.52611	6.38365	6.24078	6.40484	7.6703	6.17764	6.17053	6.82438	6.50421	6.76514	6.65375	6.40314	6.3971	6.47949	6.20974	6.28649	7.5026
chr17	25374285	25433783	17342249	NM_021415 // Cacna1h // calcium channel, voltage-dependent, T type, alpha 1H subunit //	Cacna1h	NM_021415	NM_021415 // RefSeq // Mus musculus calcium channel, voltage-dependent, T type, alpha 1		6.51462	9.01953	7.54662	7.75601	8.65079	8.34671	8.9901	6.30595	6.35539	9.94735	7.26193	8.17058	7.90511	7.82519	8.17993	8.13298	7.46024	8.86879	8.6173	8.70584	6.08541	7.62752	9.09283	6.04269	8.93782	8.71624	6.49936	8.85786	9.15914	5.79648	7.45581	8.14394	7.1481	8.11384	8.03224	6.658	7.86699	6.69277	8.714	8.98961	7.7548
chr17	34952240	34952309	17344124	---		---	AF357376 // GenBank // Mus musculus clone MBII-308 C/D box snoRNA, partial sequence. //		11.5815	11.4775	10.763	12.367	12.0419	11.8499	11.3712	10.4875	10.9547	11.6333	11.8437	11.4415	11.9674	11.3232	12.0751	11.8219	10.9746	11.5163	11.8137	11.52	11.2802	11.7058	11.4035	11.2995	11.3146	11.417	11.4524	11.3583	11.2083	11.3857	11.5772	11.0816	11.9322	11.2043	10.5999	11.4624	11.4392	11.5622	11.4614	11.345	11.0415
chr17	25844734	25861515	17342438	NM_001163766 // Wdr90 // WD repeat domain 90 // 17 A3.3|17 // 106618 /// ENSMUST0000007	Wdr90	NM_001163766	NM_001163766 // RefSeq // Mus musculus WD repeat domain 90 (Wdr90), mRNA. // chr17 // 1		8.53166	8.73048	8.50293	8.53734	8.89957	8.93779	8.66512	7.41737	8.27141	9.09046	9.05258	8.62419	8.7441	8.483	9.68151	8.40406	8.66331	9.16143	8.90576	8.79105	8.44254	8.7171	8.22258	8.63811	8.74231	9.25178	8.58355	8.32353	8.64167	7.95084	8.81554	8.43169	8.85854	8.77795	8.79479	8.85318	8.90081	8.64657	8.8196	9.17758	8.62864
chr17	6314199	6493180	17332912	---		---	BC125250 // GenBank // Mus musculus cDNA clone IMAGE:40061117. // chr17 // 100 // 67 //		3.16608	3.60017	3.54902	3.68847	3.07001	4.3409	3.43658	3.10221	3.20745	3.35641	4.3174	3.29498	4.35838	3.26707	3.72757	3.3024	3.61575	3.50794	3.70084	3.44589	3.13256	3.89931	3.13837	3.12551	3.00949	3.3322	3.45707	3.25569	3.54078	2.94729	3.22462	3.11593	3.92707	3.08625	3.42609	3.56991	3.52762	3.36915	3.61841	3.43984	3.61615
chr17	17830719	17843009	17333709	NM_001162909 // Ncrna00085 // non-protein coding RNA 85 // 17 A3.2|17 // 75202 /// ENSM	Ncrna00085	NM_001162909	NM_001162909 // RefSeq // Mus musculus non-protein coding RNA 85 (Ncrna00085), mRNA. //		7.03436	7.74966	7.53967	7.65206	7.93028	7.89137	7.67451	7.83109	7.24448	7.58006	7.90895	7.88425	7.81992	7.76794	7.54853	7.61304	7.9221	7.4716	7.83266	7.53763	7.23542	7.88956	7.51668	7.28132	7.54654	7.59255	7.92729	7.71136	7.70374	7.32048	7.62997	7.98892	7.58644	7.74849	7.60823	7.48839	7.82292	7.42707	7.21557	7.40566	7.59804
chr17	31295483	31350709	17335818	NM_001242427 // Slc37a1 // solute carrier family 37 (glycerol-3-phosphate transporter),	Slc37a1	NM_001242427	NM_001242427 // RefSeq // Mus musculus solute carrier family 37 (glycerol-3-phosphate t		8.30683	7.3639	7.7631	8.15442	7.09744	8.12772	7.72354	9.86897	8.44034	7.86543	7.55114	8.35334	7.5911	8.09301	7.97457	8.60997	8.24617	8.16914	7.58788	7.41984	9.09292	7.48165	8.06946	9.28549	7.79045	7.03155	6.75415	8.42073	6.89832	8.82257	7.98223	7.37911	7.41984	8.17256	8.85041	7.71151	7.45163	7.76846	6.73488	6.59617	7.97087
chr17	32810144	32821697	17336031	NM_177359 // Zfp799 // zinc finger protein 799 // 17 B1|17 // 240064 /// ENSMUST0000007	Zfp799	NM_177359	NM_177359 // RefSeq // Mus musculus zinc finger protein 799 (Zfp799), mRNA. // chr17 //		5.02961	5.28179	5.61937	5.80568	4.81603	5.31047	5.3558	4.54777	4.78835	5.1126	4.99586	5.27817	5.56514	5.16468	4.42577	5.59235	5.64814	4.96154	5.47417	5.19631	4.26343	5.33366	4.83895	4.44291	5.23598	5.45753	5.44461	5.21884	5.32766	4.43764	5.26688	5.19356	6.01591	5.45427	4.65002	5.23403	5.19034	5.37656	5.43645	5.26525	5.62552
chr17	35071348	35078065	17344200	ENSMUST00000007259 // Ly6g6d // lymphocyte antigen 6 complex, locus G6D // 17 B1|17 //	Ly6g6d	ENSMUST00000007259	ENSMUST00000007259 // ENSEMBL // cdna:known chromosome:NCBIM37:17:35208388:35211445:-1		5.57562	5.6825	5.355	5.84904	5.51502	5.55085	5.35785	6.2439	5.76516	5.77547	5.42167	5.38599	5.19311	5.44588	5.59514	5.34724	5.47567	5.32922	5.24633	5.1828	5.68399	5.05217	5.53376	5.61249	5.41322	5.31304	5.41501	5.48959	5.30101	5.71193	5.37513	5.33067	5.36205	5.35802	5.30207	5.34289	5.24779	5.54291	5.21812	5.74528	5.62169
chr17	33089310	33110705	17336052	NM_001024950 // Zfp563 // zinc finger protein 563 // 17 B1|17 // 240068 /// ENSMUST0000	Zfp563	NM_001024950	NM_001024950 // RefSeq // Mus musculus zinc finger protein 563 (Zfp563), mRNA. // chr17		6.7003	7.04521	7.11765	7.15838	6.95816	6.86011	7.06284	6.48908	6.50164	6.8192	6.67867	7.14934	6.79286	7.25573	6.59516	7.51215	7.38732	6.81258	6.76044	7.16127	6.44937	6.85175	6.34273	6.68817	7.41509	7.31475	7.26763	7.02626	7.33298	6.71373	7.20227	6.93335	6.97424	7.53202	6.8972	7.3281	7.1832	7.39096	7.26157	7.11794	7.69808
chr17	34996736	35001664	17344140	BC027314 // D17H6S56E-5 // DNA segment, Chr 17, human D6S56E 5 // 17 B1|17 19.0 cM // 1	D17H6S56E-5	BC027314	BC027314 // GenBank // Mus musculus DNA segment, Chr 17, human D6S56E 5, mRNA (cDNA clo		9.45158	9.12307	9.23425	9.32745	9.26358	9.02105	9.33236	7.513	10.7985	9.31167	8.98808	8.9139	9.125	9.08881	8.77852	9.45889	9.35257	9.26276	8.96394	9.13217	10.479	9.27102	9.34599	10.5881	8.98241	9.39665	9.15558	8.73227	8.96898	10.0891	9.20524	9.03057	8.98483	9.2571	8.97877	9.16423	9.00675	8.96085	9.02079	9.06942	8.84025
chr17	12923833	12940402	17340953	ENSMUST00000043923 // Acat3 // acetyl-Coenzyme A acetyltransferase 3 // 17 A1|17 7.55 c	Acat3	ENSMUST00000043923	ENSMUST00000043923 // ENSEMBL // cdna:known chromosome:NCBIM37:17:13116699:13133268:-1		3.64933	3.91408	4.22561	4.46007	4.33897	4.20888	4.48869	4.16942	4.28328	5.28815	4.18457	3.56555	4.4185	4.15109	4.03817	4.24103	4.15538	4.32569	4.29118	4.20676	3.90977	3.97917	4.21166	3.68941	4.23776	3.97311	4.18502	4.10391	4.32146	3.83694	3.9869	3.90445	4.51942	3.88655	4.12576	4.16313	3.99317	4.22957	4.20831	4.35799	3.73487
chr17	29827956	29970087	17343088	NM_001081160 // Mdga1 // MAM domain containing glycosylphosphatidylinositol anchor 1 //	Mdga1	NM_001081160	NM_001081160 // RefSeq // Mus musculus MAM domain containing glycosylphosphatidylinosit		7.29003	7.48906	7.74024	7.8111	7.2176	7.19999	6.9819	5.66317	5.82417	7.09037	7.52876	7.46221	6.89835	7.66348	7.70039	7.89403	7.81361	7.41347	7.77184	7.07763	5.92984	6.68182	6.91636	5.90567	7.32475	7.33124	7.69498	6.95096	6.50519	5.50717	7.75977	7.94342	7.79134	7.62727	8.57898	7.20871	7.76586	7.64694	6.86336	7.67879	7.51464
chr17	35121455	35124815	17336970	NM_001128597 // Gpank1 // G patch domain and ankyrin repeats 1 // 17 B1|17 19.02 cM //	Gpank1	NM_001128597	NM_001128597 // RefSeq // Mus musculus G patch domain and ankyrin repeats 1 (Gpank1), t		6.4689	6.1307	6.72758	5.96346	6.41209	6.04974	6.57918	6.1682	6.06219	6.47424	6.34678	6.86566	6.34621	6.62145	6.30362	6.6049	6.98471	6.38158	6.29434	6.37393	6.35219	6.46436	6.30681	6.29762	6.46839	6.78156	6.56397	6.28456	6.7927	5.75932	6.39918	6.41943	6.63523	6.94874	6.2919	6.78545	5.63737	6.67538	6.25765	6.61204	6.47638
chr17	12741311	12860122	17333307	NR_027784 // Airn // antisense Igf2r RNA // 17 A1|17 8.66 cM // 104103 /// NR_027772 //	Airn	NR_027784	NR_027784 // RefSeq // Mus musculus antisense Igf2r RNA (Airn), transcript variant 4, n		7.16603	6.99197	6.87442	6.80447	7.18848	6.92051	7.15378	7.43246	8.26506	6.99846	7.26427	6.69718	6.58768	6.96986	6.98692	6.70774	7.92576	7.09534	7.09615	6.78489	7.67181	7.37196	7.26491	8.40506	7.11864	7.23378	6.92813	7.28465	7.17918	8.31456	6.72518	7.60255	6.84288	6.75053	7.02632	6.99552	6.97355	6.7199	7.36488	7.21145	6.54167
chr17	24527795	24533747	17341905	NM_177375 // Rab26 // RAB26, member RAS oncogene family // 17 A3.3|17 // 328778 /// ENS	Rab26	NM_177375	NM_177375 // RefSeq // Mus musculus RAB26, member RAS oncogene family (Rab26), mRNA. //		6.71922	5.82129	6.20312	6.1194	6.3329	6.48408	6.45187	6.41712	6.57975	6.54433	7.00675	6.62495	6.27194	6.09508	6.75675	6.52474	6.36192	5.80988	6.35926	6.32509	6.27402	6.4482	6.08918	6.39768	6.15191	6.17528	5.97282	6.24694	6.49013	6.77332	5.95241	6.14108	6.12821	6.10865	6.16204	6.13295	6.36	6.13114	7.64139	6.20391	5.8434
chr17	29490812	29495476	17335540	ENSMUST00000024811 // Pim1 // proviral integration site 1 // 17 A3.3|17 16.4 cM // 1871	Pim1	ENSMUST00000024811	ENSMUST00000024811 // ENSEMBL // cdna:known chromosome:NCBIM37:17:29627757:29632390:1 g		9.21731	9.53554	9.79	9.92679	9.35294	9.57883	9.63907	7.5613	8.5127	10.6202	9.41364	9.44057	9.95959	9.28304	9.29737	9.46312	10.1166	9.21644	9.80275	9.75891	8.24397	9.25806	9.29056	8.51712	8.97774	9.22081	9.33583	9.00903	9.08111	8.13163	9.51613	9.07783	10.0789	9.52495	9.91607	9.53721	9.01346	9.71857	8.70169	9.32449	9.33913
chr17	35823230	35832791	17337232	ENSMUST00000001569 // Flot1 // flotillin 1 // 17 B1|17 // 14251 /// NM_008027 // Flot1	Flot1	ENSMUST00000001569	ENSMUST00000001569 // ENSEMBL // cdna:known chromosome:NCBIM37:17:35960175:35969736:1 g		8.81027	9.31453	8.85669	8.74597	8.85778	9.17798	8.98313	8.98	9.17418	8.98681	9.16759	9.39978	8.80019	8.841	9.05477	9.28781	9.37201	8.45638	9.17395	9.07705	8.9763	9.3368	9.07915	8.83615	9.02168	9.10506	8.73148	9.26345	8.69787	8.94035	9.14899	8.85735	9.27203	8.99366	8.91217	9.20393	8.77896	9.08635	9.09977	8.62884	9.11396
chr17	26414965	26446349	17334922	NM_001081656 // Neurl1b // neuralized homolog 1b (Drosophila) // 17 A3.3|17 // 240055 /	Neurl1b	NM_001081656	NM_001081656 // RefSeq // Mus musculus neuralized homolog 1b (Drosophila) (Neurl1b), mR		9.68652	10.1075	9.90178	10.4027	9.90079	10.3827	10.0555	7.17367	8.10978	9.97868	10.446	10.3844	10.0664	10.1444	10.1493	10.0115	10.2283	10.2477	10.1808	10.061	8.68826	10.2551	8.93813	8.74275	9.9424	9.77047	9.81802	9.35932	9.61434	8.00011	10.5302	9.94097	10.3973	9.88082	10.3423	11.068	10.0912	9.62266	9.82896	10.0952	9.21622
chr17	25240170	25242799	17334625	NM_026676 // 0610007P22Rik // RIKEN cDNA 0610007P22 gene // 17 A3.3|17 // 68327 /// NM_	0610007P22Rik	NM_026676	NM_026676 // RefSeq // Mus musculus RIKEN cDNA 0610007P22 gene (0610007P22Rik), transcr		7.55975	7.84313	8.01096	8.24978	7.75543	7.72433	7.94941	7.29964	7.2434	7.84651	8.09683	7.84123	7.89511	7.7865	8.21976	8.06994	8.38683	7.80149	7.94627	7.93281	6.98763	7.98852	7.32673	7.32747	7.45018	7.92907	7.78944	7.4253	7.78706	6.91473	7.87222	7.57054	8.12557	7.97081	7.60119	7.91435	7.69162	7.98106	7.98167	7.94206	7.80566
chr17	28399095	28517524	17342868	ENSMUST00000114792 // Fkbp5 // FK506 binding protein 5 // 17 A3.3|17 13.0 cM // 14229 /	Fkbp5	ENSMUST00000114792	ENSMUST00000114792 // ENSEMBL // cdna:known chromosome:NCBIM37:17:28536042:28654469:-1		8.39789	8.12563	8.16996	7.85843	7.76993	8.31098	8.0161	9.19014	9.72314	8.15972	8.40293	8.10982	8.26224	8.22198	8.4024	7.94567	8.49749	7.91881	8.0843	7.84443	8.95978	8.05162	8.43486	8.52986	7.9958	7.75182	7.94374	8.1901	7.79285	9.18461	8.24158	8.86956	8.38356	8.53444	8.22938	8.31625	8.13691	7.91239	8.30594	7.8616	7.90227
chr17	6610103	6621334	17340584	NR_028305 // Tmem181c-ps // transmembrane protein 181C, pseudogene // 17 A1|17 // 10004	Tmem181c-ps	NR_028305	NR_028305 // RefSeq // Mus musculus transmembrane protein 181C, pseudogene (Tmem181c-ps		7.81734	7.91116	7.89376	8.53056	7.67926	8.02764	7.08519	7.11775	7.45585	7.28224	8.58987	8.25433	8.14384	7.72475	7.58613	7.73225	8.39036	7.72633	8.16158	7.39115	7.68128	8.12036	7.07074	7.6991	7.82821	8.00387	8.22229	8.04445	7.65515	7.85917	8.67422	8.10638	8.41063	7.74221	7.23264	8.42954	8.72023	8.24253	7.35305	7.73394	7.69275
chr17	34020792	34024680	17343724	NM_009066 // Ring1 // ring finger protein 1 // 17 B1|17 // 19763 /// ENSMUST00000025183	Ring1	NM_009066	NM_009066 // RefSeq // Mus musculus ring finger protein 1 (Ring1), mRNA. // chr17 // 10		7.14081	6.93717	6.76134	6.97914	6.82056	7.11804	6.86682	7.75514	7.80981	7.07654	7.04103	6.95966	6.84828	6.67787	7.26593	7.23251	6.77017	6.86682	6.92039	6.81067	7.50155	6.86282	6.99879	7.72221	6.68323	6.91491	6.91956	6.82521	6.89969	7.60566	6.98304	6.48617	6.8983	6.8045	6.94505	7.14026	6.73673	7.04699	7.03912	7.05984	6.74904
chr17	25570811	25575043	17334694	NR_045176 // 2810468N07Rik // RIKEN cDNA 2810468N07 gene // 17|17 // 72834	2810468N07Rik	NR_045176	NR_045176 // RefSeq // Mus musculus RIKEN cDNA 2810468N07 gene (2810468N07Rik), non-cod		6.53853	7.45995	7.30331	7.16792	7.06517	7.26671	7.77422	5.76964	5.23323	6.58471	7.23535	8.01581	6.76975	7.14363	7.61863	8.16025	7.9394	7.36731	6.72831	7.44689	5.60697	7.62996	6.98549	6.11436	7.61193	6.48459	6.6357	7.20828	7.71821	5.31838	7.06378	8.0432	7.46235	7.38314	7.82849	7.08147	6.55555	7.16478	6.10266	6.36711	8.05998
chr17	23556769	23558313	17334062	---		---	ENSMUST00000170602 // ENSEMBL // ensembl_lincrna:lincRNA chromosome:NCBIM37:17:23693736		5.04335	5.51594	4.8734	5.29944	5.24952	5.48239	5.00266	5.11684	5.11365	5.09121	5.39886	5.16641	5.13379	5.38261	5.04943	4.60838	5.12844	4.96007	5.51434	5.33918	5.29182	4.97479	5.27716	5.38079	5.27757	4.81455	5.20256	5.20661	5.11026	5.2332	5.27426	5.08111	5.07752	4.96478	4.96867	5.13105	4.92706	5.34438	5.06706	5.01425	5.24898
chr17	31564773	31607693	17335878	NR_027493 // Pknox1 // Pbx/knotted 1 homeobox // 17 18.0 cM|17 B-C // 18771 /// ENSMUST	Pknox1	NR_027493	NR_027493 // RefSeq // Mus musculus Pbx/knotted 1 homeobox (Pknox1), transcript variant		8.06455	8.03229	8.04944	8.57625	7.88048	8.84738	8.16498	7.8263	7.87847	7.86221	8.32815	8.57718	8.44482	8.0729	9.27812	8.05236	8.15132	8.09349	8.26753	8.53864	7.98701	8.83401	7.83469	8.19698	8.61838	8.08505	8.10459	7.88805	8.42766	7.20991	8.45962	8.49614	8.26158	8.08489	8.27136	8.51996	8.46156	8.08648	8.67375	8.38593	8.11939
chr17	25274124	25275528	17334636	NR_027452 // Gm17801 // predicted gene, 17801 // 17|17 // 100272221	Gm17801	NR_027452	NR_027452 // RefSeq // Mus musculus predicted gene, 17801 (Gm17801), non-coding RNA. //		5.26191	5.15664	5.24755	4.49619	5.25437	5.06761	5.08663	5.1116	5.47076	5.15779	5.19904	5.27306	5.39585	5.30214	4.86362	4.75729	5.66877	5.25083	5.17692	4.91285	5.35544	5.2194	4.77618	5.52657	4.91188	5.20951	5.23465	5.19285	5.08388	5.43369	5.13798	5.11297	5.04428	5.21636	5.20846	5.16192	5.37109	5.12125	5.16047	5.2203	5.08957
chr17	25834465	25837157	17342403	NM_144816 // Rhbdl1 // rhomboid, veinlet-like 1 (Drosophila) // 17 A3.3|17 11.6 cM // 2	Rhbdl1	NM_144816	NM_144816 // RefSeq // Mus musculus rhomboid, veinlet-like 1 (Drosophila) (Rhbdl1), mRN		6.90058	7.28312	6.60073	7.15789	6.65244	7.11723	6.99876	6.77338	6.39625	6.9302	6.78226	7.41557	6.78451	6.90365	7.29622	7.23582	7.30912	7.55168	6.76936	6.85115	6.68087	7.29552	6.78652	6.49976	7.33549	7.62554	6.54464	7.12561	7.12359	6.0845	7.05596	7.17723	7.21512	7.16241	6.98461	7.0341	6.90087	6.85791	7.23673	7.27427	6.70832
chr17	10840384	12063361	17333206	NM_016694 // Park2 // Parkinson disease (autosomal recessive, juvenile) 2, parkin // 17	Park2	NM_016694	NM_016694 // RefSeq // Mus musculus Parkinson disease (autosomal recessive, juvenile) 2		6.70189	6.54947	6.00064	5.55267	6.0977	6.27556	6.13459	7.72318	6.64137	6.17229	6.37212	6.36589	6.14426	6.2767	7.19906	6.13722	6.40316	7.18389	6.39503	6.05325	6.28368	6.5361	6.46732	6.99279	6.17031	6.49292	5.74601	6.63199	5.93452	7.4233	6.25012	6.30959	6.04094	6.27238	6.47895	6.43208	6.73762	6.42166	5.78812	6.35459	6.07188
chr17	35246969	35249784	17548027	NM_019693 // Ddx39b // DEAD (Asp-Glu-Ala-Asp) box polypeptide 39B // 17 B1|17 19.12 cM	Ddx39b	NM_019693	NM_019693 // RefSeq // Mus musculus DEAD (Asp-Glu-Ala-Asp) box polypeptide 39B (Ddx39b)		7.27248	7.34454	7.80582	7.98156	8.00965	8.58966	7.39497	7.12854	7.23236	7.62743	9.01208	7.5026	9.28333	7.19452	8.23233	7.47328	7.89994	7.43675	8.94371	7.61089	7.24151	8.11006	7.44051	7.3522	6.90163	7.39469	7.89293	7.26037	7.69631	7.26559	7.70365	7.05657	8.82012	7.1077	7.38258	7.62989	7.95604	7.703	7.77496	7.55563	7.31887
chr17	35879778	35892670	17337285	NM_026987 // Dhx16 // DEAH (Asp-Glu-Ala-His) box polypeptide 16 // 17|17 B3 // 69192 //	Dhx16	NM_026987	NM_026987 // RefSeq // Mus musculus DEAH (Asp-Glu-Ala-His) box polypeptide 16 (Dhx16),		8.68541	8.79598	8.60914	8.85403	8.71802	8.80978	8.66545	9.1152	9.3056	8.8504	8.60829	8.78002	8.79676	8.62858	9.11705	9.02878	9.06503	8.65687	8.77867	8.92627	9.40176	8.69832	8.97204	9.19761	8.60487	8.50897	8.80723	8.44663	8.45419	9.13827	8.94215	8.2392	8.65302	8.96823	8.20658	8.89519	8.6314	8.73559	8.75422	8.93595	8.60663
chr17	29360914	29379553	17335519	NM_001159538 // Fgd2 // FYVE, RhoGEF and PH domain containing 2 // 17 A3.3|17 15.26 cM	Fgd2	NM_001159538	NM_001159538 // RefSeq // Mus musculus FYVE, RhoGEF and PH domain containing 2 (Fgd2),		6.87742	6.22607	6.4761	6.57846	6.51233	6.57532	6.33558	6.65794	6.76232	6.29592	6.59582	6.91731	6.19359	6.66223	6.49113	6.4107	6.40481	7.20987	6.23286	6.76988	6.73322	6.16729	6.4043	6.54792	6.55302	6.17922	6.34134	6.69399	6.5846	6.56684	6.3362	6.57378	6.32022	6.8837	7.00903	6.22309	6.78319	6.12414	6.32769	6.25989	6.31923
chr17	21690212	21692213	17333962	NR_045766 // Gm10509 // zinc finger protein 51 pseudogene // 17 A3.2 // 100310809 /// N	Gm10509	NR_045766	NR_045766 // RefSeq // Mus musculus predicted gene 10509 (Gm10509), non-coding RNA. //		3.2418	3.47647	3.9291	2.79622	3.40608	3.79357	3.5605	2.7132	3.78478	3.33961	3.44499	3.82133	4.02431	4.15378	3.39086	3.28002	4.60743	3.69132	3.48395	3.65822	3.34521	3.66003	2.83441	3.37794	3.87171	3.92969	4.23911	4.09934	4.03692	3.43548	4.30861	3.95391	3.9234	4.21468	4.04282	4.12778	3.43966	4.15239	4.32816	3.59144	4.22896
chr17	22144359	22166190	17341392	ENSMUST00000080249 // Zfp947 // zinc finger protein 947 // 17 A3.3|17 // 210853 /// NM_	Zfp947	ENSMUST00000080249	ENSMUST00000080249 // ENSEMBL // cdna:known chromosome:NCBIM37:17:22281326:22303157:-1		4.05859	3.99776	3.83381	3.8508	4.07621	3.76035	4.1245	3.75904	4.01284	3.87647	3.69338	3.67883	3.57893	3.87437	3.49141	4.83079	4.85947	4.00968	3.95678	4.37049	3.79261	3.66553	3.99255	4.72875	3.79235	4.00123	5.04619	4.31489	4.34999	3.94621	3.88523	4.04451	3.88985	3.82669	3.74297	3.65398	4.3157	3.82208	4.29117	3.79896	4.00726
chr17	35394099	35395632	17337110	NR_051981 // H2-Q5 // histocompatibility 2, Q region locus 5 // 17 B1|17 19.17 cM // 15	H2-Q5	NR_051981	NR_051981 // RefSeq // Mus musculus histocompatibility 2, Q region locus 5 (H2-Q5), non		6.23675	4.65105	6.13085	5.53659	5.24952	5.55115	4.73715	4.86365	7.7186	5.25151	5.47037	6.57816	4.9962	6.10644	7.57911	5.17208	4.91726	5.7142	5.15911	6.74445	8.07545	6.2348	5.01619	7.98036	4.32616	4.98876	4.67031	4.80552	6.24805	6.97183	4.23502	6.34077	5.32341	5.93734	4.2488	6.10748	4.09126	4.65502	4.51161	4.70884	4.26034
chr17	34305867	34316674	17336502	NM_010382 // H2-Eb1 // histocompatibility 2, class II antigen E beta // 17 B1|17 18.66	H2-Eb1	NM_010382	NM_010382 // RefSeq // Mus musculus histocompatibility 2, class II antigen E beta (H2-E		8.51428	6.87703	7.34893	7.60358	6.99117	6.84156	6.96933	8.49909	8.64542	6.85409	6.5808	7.12624	6.9157	8.02603	6.65996	7.17267	7.24772	6.90452	6.76525	7.01565	8.32301	6.92884	7.37783	7.15081	7.11368	7.13002	6.84827	7.44259	7.76321	8.28603	7.40547	7.04196	7.15486	8.75353	6.31112	6.52215	6.62986	6.67419	6.5479	6.79284	6.46461
chr17	32804867	32804977	17343476	---		---	ENSMUST00000158078 // ENSEMBL // ncrna:rRNA chromosome:NCBIM37:17:32941812:32941922:-1		6.58007	7.34189	6.95304	5.47121	6.69777	7.52965	6.92274	5.35801	4.98548	6.84806	7.17938	6.68442	7.14779	7.19513	6.8828	4.97598	6.63035	7.37478	6.38075	7.11709	5.26268	7.34338	6.24941	4.75177	7.00989	7.48559	6.99907	6.5831	7.2473	5.63228	6.66029	7.57274	6.94905	7.27678	7.13725	6.87285	7.27431	6.92324	7.46567	7.29234	7.14697
chr17	35122738	35126440	17344238	NM_032460 // Gpank1 // G patch domain and ankyrin repeats 1 // 17 B1|17 19.02 cM // 818	Gpank1	NM_032460	NM_032460 // RefSeq // Mus musculus G patch domain and ankyrin repeats 1 (Gpank1), tran		6.2339	6.01023	6.14892	6.45683	5.74162	6.29018	5.92705	5.84153	6.09942	6.00718	6.25782	5.9822	5.93122	5.87144	6.2815	5.86851	6.0969	5.94491	5.97721	5.7996	6.01972	5.76654	5.89233	6.23818	5.8029	6.00482	6.07956	6.04589	5.92031	6.14573	5.84094	5.73407	6.15615	6.14114	5.88875	5.78672	6.05497	5.78928	6.02419	5.769	5.87487
chr17	26252910	26285506	17334904	NR_037906 // Luc7l // Luc7 homolog (S. cerevisiae)-like // 17 B1|17 11.8 cM // 66978 //	Luc7l	NR_037906	NR_037906 // RefSeq // Mus musculus Luc7 homolog (S. cerevisiae)-like (Luc7l), transcri		9.85852	10.1225	10.39	10.1423	10.0387	9.85564	10.2128	9.39373	9.66423	10.2543	10.1132	10.1784	10.156	10.1328	9.9937	10.2138	10.7731	9.9625	10.3217	10.2696	9.78547	10.0203	9.99299	9.78289	10.2837	10.43	10.5103	9.9591	10.1095	9.86959	10.439	10.2561	10.5707	10.4683	10.2057	10.4498	10.4248	10.2184	10.1374	10.1827	10.238
chr17	35859653	35866886	17344453	NM_175242 // Ppp1r18 // protein phosphatase 1, regulatory subunit 18 // 17 B1|17 // 764	Ppp1r18	NM_175242	NM_175242 // RefSeq // Mus musculus protein phosphatase 1, regulatory subunit 18 (Ppp1r		4.8273	5.6398	5.73587	5.96255	4.96087	5.6814	5.51304	5.18548	5.3585	6.13714	6.05194	6.13297	5.66952	5.56115	5.55338	5.66111	5.8444	5.24199	5.67823	5.49933	4.88054	5.59852	5.46912	5.34462	5.60644	5.55733	5.52555	5.53034	5.52903	4.94405	5.73122	5.87131	5.55868	5.82808	5.1985	6.02556	5.52112	5.89334	5.52534	5.39981	5.49454
chr17	32817204	32830248	17343478	NM_177359 // Zfp799 // zinc finger protein 799 // 17 B1|17 // 240064 /// ENSMUST0000007	Zfp799	NM_177359	NM_177359 // RefSeq // Mus musculus zinc finger protein 799 (Zfp799), mRNA. // chr17 //		7.54662	7.85958	8.20881	7.65679	7.41588	7.55552	7.97021	7.29288	7.15986	7.76202	7.37526	7.84982	7.51848	8.05225	7.59393	8.0327	8.39162	7.80359	7.8971	7.88911	7.23878	7.82644	7.80287	7.48588	8.22098	8.1434	8.43513	7.8474	8.02857	7.19979	8.18683	7.91626	8.26719	8.31384	7.6587	7.84199	8.15404	8.35101	7.73627	8.13628	8.36781
chr17	26505592	26506077	17547994	XR_141817 // LOC100862171 // uncharacterized LOC100862171 // --- // 100862171	LOC100862171	XR_141817	XR_141817 // RefSeq // PREDICTED: Mus musculus uncharacterized LOC100862171 (LOC1008621		3.94511	4.53093	4.1428	5.44526	4.58193	5.65787	4.59874	4.33215	4.22963	5.03256	6.79206	4.34969	7.35578	4.21986	4.63765	4.73411	4.45069	4.37501	5.39265	4.63296	4.2159	4.96319	4.52883	4.14019	4.05173	4.56358	4.50898	4.1799	4.34009	4.44267	4.78821	4.07975	6.49003	4.52889	4.37981	4.44081	4.52849	5.03228	4.6182	4.50539	3.97705
chr17	12301036	12301175	17333262	---		---	ENSMUST00000104288 // ENSEMBL // ncrna:snoRNA chromosome:NCBIM37:17:12493902:12494041:1		3.15083	3.16658	3.11662	3.87664	3.23334	3.57405	3.28946	3.10386	3.04829	3.28103	3.67662	3.33591	3.3289	3.06437	3.2267	3.42763	3.52651	3.55067	3.56414	3.40397	3.25864	3.58746	3.34054	3.24315	3.09189	3.1445	3.64164	3.3998	3.3462	3.12643	3.49369	3.48209	3.72567	3.15644	3.72174	3.81927	3.57649	3.33722	3.54448	3.35909	3.17765
chr17	34135182	34139101	17336407	ENSMUST00000042121 // H2-DMa // histocompatibility 2, class II, locus DMa // 17 B1|17 1	H2-DMa	ENSMUST00000042121	ENSMUST00000042121 // ENSEMBL // cdna:known chromosome:NCBIM37:17:34272127:34276046:1 g		7.01546	6.31286	6.38115	6.22872	6.60775	6.44047	6.42325	7.38775	7.23238	6.15009	6.27984	6.81597	6.28203	6.86192	6.0328	6.57531	6.43952	6.46021	6.11066	6.71112	7.05449	6.47204	6.65559	6.60518	6.51716	6.35273	6.53863	6.44607	6.37747	7.18305	6.61039	6.53055	6.28417	7.03753	6.92019	6.27417	6.67432	6.36806	6.60644	6.07839	6.37013
chr17	23682584	23684026	17341547	NM_020293 // Cldn9 // claudin 9 // 17 A3.3|17 // 56863 /// ENSMUST00000085989 // Cldn9	Cldn9	NM_020293	NM_020293 // RefSeq // Mus musculus claudin 9 (Cldn9), mRNA. // chr17 // 100 // 100 //		7.57962	4.79139	4.79997	5.05282	4.84942	4.65551	4.95319	4.93472	4.51046	4.76681	4.30999	4.78048	4.57935	4.77996	4.73716	5.55031	4.85359	5.31569	5.10254	4.63294	4.82619	4.69911	4.91294	4.48428	4.68119	4.71256	4.87211	4.78169	4.63928	4.89813	4.57613	4.81264	5.00452	4.54592	5.07256	4.61197	4.7126	4.78018	4.51734	4.68646	4.68039
chr17	14818672	14934661	17341106	ENSMUST00000170386 // Wdr27 // WD repeat domain 27 // 17 A2|17 // 71682 /// NM_175173 /	Wdr27	ENSMUST00000170386	ENSMUST00000170386 // ENSEMBL // cdna:known chromosome:NCBIM37:17:14966338:15071658:-1		4.8902	4.58553	4.56772	4.98335	4.95063	4.63002	4.68101	5.32381	4.88929	4.74336	5.03107	4.62031	4.68994	4.54822	4.84387	4.68718	4.71013	4.60247	4.64831	4.68142	4.61205	4.52718	4.73678	5.03283	4.46455	4.41708	4.40402	4.57956	4.823	5.07389	4.45192	4.56711	4.75762	4.62765	4.83816	4.46644	4.64973	4.7374	4.36724	4.69541	4.19166
chr17	35947154	35953317	17337342	NR_028278 // Gm8801 // protein phosphatase 1, regulatory subunit 10 pseudogene // 17 B1	Gm8801	NR_028278	NR_028278 // RefSeq // Mus musculus predicted gene 8801 (Gm8801), non-coding RNA. // ch		7.19317	7.36857	7.46134	7.46598	7.43448	7.54258	7.37575	7.34988	6.90449	7.20666	7.59381	7.29193	7.7894	7.41928	7.50192	7.2156	7.51081	7.53549	7.50526	7.37986	7.5251	7.45004	7.23607	7.19682	7.39253	7.35178	7.38497	7.39378	7.204	7.14038	7.25805	7.42344	7.65798	7.41287	7.9416	7.36611	7.7011	7.54858	7.11539	7.56782	7.44445
chr17	34950950	34951017	17344120	NR_028527 // Snord52 // small nucleolar RNA, C/D box 52 // 17|17 // 100217427	Snord52	NR_028527	NR_028527 // RefSeq // Mus musculus small nucleolar RNA, C/D box 52 (Snord52), small nu		6.35057	6.80117	6.64117	7.45491	7.17014	6.54567	6.85209	5.50858	6.78159	7.22423	6.71636	6.49393	6.77876	6.48431	7.18567	6.81159	7.30945	6.60395	6.86261	6.41858	6.59519	6.73195	6.22293	6.54958	6.15984	6.89855	6.86309	6.33231	7.027	5.73425	6.6471	5.99438	6.8441	7.1427	6.35929	6.91363	6.61433	7.02467	7.46041	7.1276	6.50603
chr17	12318853	12327250	17333264	NR_045290 // 4732491K20Rik // RIKEN cDNA 4732491K20 gene // 17 A1|17 // 224523	4732491K20Rik	NR_045290	NR_045290 // RefSeq // Mus musculus RIKEN cDNA 4732491K20 gene (4732491K20Rik), non-cod		7.19402	8.07048	7.78181	7.67217	7.25854	7.22824	7.69479	7.39149	6.91707	7.45757	7.66221	7.99138	7.35326	7.46642	7.22647	8.12434	8.06424	7.93534	7.59867	7.42234	6.81182	7.48849	7.48588	7.03813	7.82459	8.11111	7.81963	7.86699	7.7934	6.87463	7.48648	8.10682	7.5975	7.52768	8.02937	7.37116	7.82831	7.85111	8.05645	7.92708	8.06316
chr17	26933127	26937890	17335000	NM_009343 // Phf1 // PHD finger protein 1 // 17 A3.3|17 15.15 cM // 21652 /// ENSMUST00	Phf1	NM_009343	NM_009343 // RefSeq // Mus musculus PHD finger protein 1 (Phf1), mRNA. // chr17 // 100		8.13199	7.98841	7.80496	7.78083	8.13615	7.80719	7.5364	8.78676	8.36399	7.83738	7.85311	8.07196	7.86998	7.86962	8.38181	7.91615	8.04753	8.29413	7.85463	7.98116	8.35028	8.05227	8.00532	8.29029	8.0002	7.85971	7.42343	8.00327	7.55036	8.24612	7.85682	7.67662	7.95286	7.97697	8.24142	7.90505	7.76418	7.92083	7.85507	8.02614	7.82945
chr17	33016863	33033402	17343527	NM_028543 // Zfp763 // zinc finger protein 763 // 17 B1|17 // 73451 /// ENSMUST00000087	Zfp763	NM_028543	NM_028543 // RefSeq // Mus musculus zinc finger protein 763 (Zfp763), mRNA. // chr17 //		6.88999	7.47192	7.89625	6.48594	7.11257	7.2569	7.67582	5.67916	6.5194	6.91658	7.27518	7.14169	7.42715	7.80078	6.97718	7.60024	7.96595	7.24448	7.40523	7.72776	6.67059	7.69949	6.85447	6.72488	7.97876	7.71531	8.05003	7.44486	8.12203	6.73967	7.73149	7.08075	7.62377	8.06785	7.04887	8.05217	7.63542	8.03014	7.9169	7.56474	8.37735
chr17	25989036	26069409	17342559	NM_001162869 // Rab11fip3 // RAB11 family interacting protein 3 (class II) // 17 A3.3|1	Rab11fip3	NM_001162869	NM_001162869 // RefSeq // Mus musculus RAB11 family interacting protein 3 (class II) (R		8.63739	7.85407	8.10748	8.48505	8.10316	8.02035	7.97388	8.11283	8.33431	7.78919	8.12741	7.79651	8.01054	8.24047	8.483	8.39672	8.46463	8.62773	8.04198	8.12246	8.52613	8.22783	7.92052	8.2872	8.13967	8.14114	8.08441	7.85254	7.90642	7.9982	8.15303	8.0695	8.0128	8.31562	8.11373	7.86035	8.07211	8.04841	8.13372	8.2141	8.44586
chr17	33824591	33838316	17336190	NM_023202 // Ndufa7 // NADH dehydrogenase (ubiquinone) 1 alpha subcomplex, 7 (B14.5a) /	Ndufa7	NM_023202	NM_023202 // RefSeq // Mus musculus NADH dehydrogenase (ubiquinone) 1 alpha subcomplex,		8.71833	8.42345	8.22319	9.02586	8.24553	8.10729	8.14248	8.48954	8.67542	8.25224	8.03058	8.1987	8.12149	8.31338	8.62253	8.56586	8.58199	7.96647	8.59908	8.38796	8.4487	8.3359	8.16955	8.46432	8.07464	8.37435	8.42401	8.31504	8.34863	8.4943	8.12383	8.06047	8.40144	8.20133	7.96833	8.33092	8.03661	8.37365	8.44721	8.43447	8.28405
chr17	3326573	3519397	17332695	NM_011878 // Tiam2 // T cell lymphoma invasion and metastasis 2 // 17 A1|17 4.0 cM // 2	Tiam2	NM_011878	NM_011878 // RefSeq // Mus musculus T cell lymphoma invasion and metastasis 2 (Tiam2),		5.69489	5.28081	5.70954	5.24487	5.0582	5.95742	5.45821	8.88048	6.27624	5.20135	5.7764	6.3688	5.76653	5.1203	6.23252	5.88831	5.52762	5.5438	5.61474	5.42547	6.11722	6.30688	5.69514	6.50851	4.86784	4.88328	4.69512	5.45763	5.14546	6.13958	5.08169	5.44303	5.07341	5.53761	4.88951	5.11726	4.96185	5.03267	4.78888	4.77519	5.32005
chr17	25823627	25828730	17334790	NM_173741 // Wdr24 // WD repeat domain 24 // 17 A3.3|17 // 268933 /// ENSMUST0000002683	Wdr24	NM_173741	NM_173741 // RefSeq // Mus musculus WD repeat domain 24 (Wdr24), mRNA. // chr17 // 100		6.72904	6.74814	6.74199	6.64228	6.81468	6.67833	6.74952	7.05069	7.22247	6.70941	6.5976	6.76221	6.79067	6.62874	6.99147	7.01809	7.2464	6.79775	6.673	6.87781	6.87837	6.87831	6.70972	7.14747	6.74556	6.66122	6.53267	6.59208	6.85762	6.95137	6.91429	6.58835	6.80975	6.76878	6.80485	6.86121	6.47692	6.88211	6.78869	6.9028	6.65136
chr17	25234312	25240116	17342167	NM_172529 // Gnptg // N-acetylglucosamine-1-phosphotransferase, gamma subunit // 17 A3.	Gnptg	NM_172529	NM_172529 // RefSeq // Mus musculus N-acetylglucosamine-1-phosphotransferase, gamma sub		9.94439	9.82758	9.95226	9.94553	9.51713	9.67969	9.78184	9.64005	8.81462	9.88269	9.89695	10.0135	9.73433	9.71791	10.0231	9.74885	10.092	9.88929	9.76309	9.88692	8.79666	10.1	9.32135	9.03618	9.67413	9.82064	9.59003	9.39384	9.763	9.21627	9.64679	9.60007	9.82293	9.8759	9.47268	9.85561	9.39408	9.76061	9.8174	9.91723	9.71195
chr17	35379617	35384674	17337100	NM_001143689 // H2-Q4 // histocompatibility 2, Q region locus 4 // 17 B1|17 19.16 cM //	H2-Q4	NM_001143689	NM_001143689 // RefSeq // Mus musculus histocompatibility 2, Q region locus 4 (H2-Q4),		9.01358	8.75875	9.11732	8.73392	8.84072	8.79332	8.57475	9.25122	10.2642	9.38313	8.83761	9.3357	8.74935	9.1094	10.0143	9.27665	9.31934	8.77795	8.5779	9.51687	10.4636	8.86314	9.09374	10.7696	8.25503	8.93228	9.14524	9.59921	8.95117	10.3722	8.47092	9.84606	8.86568	9.73255	7.23187	9.28157	7.93646	8.51715	7.97488	8.53523	7.65383
chr17	21650611	21664966	17333955	NM_001166497 // 3110052M02Rik // RIKEN cDNA 3110052M02 gene // 17 A3.2|17 // 73229	3110052M02Rik	NM_001166497	NM_001166497 // RefSeq // Mus musculus RIKEN cDNA 3110052M02 gene (3110052M02Rik), mRNA		6.91345	6.74678	7.06843	6.87313	7.04802	6.78585	6.90807	6.64337	6.68737	6.81193	6.59133	7.0586	6.50296	7.08822	6.44067	6.69727	7.37195	6.50193	6.97162	6.80793	6.70331	7.04195	6.68465	6.82229	7.00719	6.50037	6.86207	7.06885	7.09494	6.41911	7.0161	6.56317	6.85243	6.98263	7.22515	7.25056	7.45883	6.87553	6.99721	6.94032	6.86799
chr17	34981854	34985891	17336829	NM_030597 // Lsm2 // LSM2 homolog, U6 small nuclear RNA associated (S. cerevisiae) // 1	Lsm2	NM_030597	NM_030597 // RefSeq // Mus musculus LSM2 homolog, U6 small nuclear RNA associated (S. c		8.57679	8.36743	8.76145	8.67388	8.36503	8.5748	8.62971	7.54217	8.03611	8.56034	8.62322	8.68188	8.64301	8.63331	8.7082	8.83172	9.31598	7.97002	8.55896	8.70799	8.37295	8.61353	8.33208	8.35488	8.65875	8.67097	8.73365	8.3362	8.67378	7.72819	8.73981	8.47108	8.84204	8.95717	8.52997	8.85364	8.59081	8.67307	8.96385	8.80979	8.36313
chr17	27856490	27900040	17335177	NM_001080769 // Uhrf1bp1 // UHRF1 (ICBP90) binding protein 1 // 17 A3.3|17 // 224648 //	Uhrf1bp1	NM_001080769	NM_001080769 // RefSeq // Mus musculus UHRF1 (ICBP90) binding protein 1 (Uhrf1bp1), mRN		7.57021	7.93704	7.6027	7.65222	7.46344	7.68649	7.35734	8.24024	8.14297	7.64926	7.64865	7.34125	7.64355	7.52246	7.90012	7.47637	7.89101	7.73939	7.8802	7.74999	8.08159	7.65183	7.34606	7.97485	7.74389	7.65319	7.57957	7.35558	7.40211	7.94131	7.35145	7.18635	7.82279	7.75731	8.0456	7.7031	7.73084	7.64971	8.08342	7.92866	7.75099
chr17	24657330	24658425	17341975	NM_001099664 // Npw // neuropeptide W // 17 A3.3|17 // 381073 /// ENSMUST00000095544 //	Npw	NM_001099664	NM_001099664 // RefSeq // Mus musculus neuropeptide W (Npw), mRNA. // chr17 // 100 // 1		6.87331	6.48043	6.53382	6.26914	6.36568	6.57375	6.73194	6.94379	6.87215	6.95811	6.33732	7.20319	6.67825	6.7607	6.65174	6.43735	6.5878	6.59981	6.4804	6.59886	7.02528	6.62014	6.4556	6.96911	6.59864	6.57731	6.54914	6.8834	6.51535	6.70923	6.64884	6.6593	6.30141	6.54272	6.47232	6.60813	6.52047	6.80565	6.69206	6.54434	6.59352
chr17	29332072	29347904	17343035	NM_019880 // Mtch1 // mitochondrial carrier homolog 1 (C. elegans) // 17 A3.3|17 // 564	Mtch1	NM_019880	NM_019880 // RefSeq // Mus musculus mitochondrial carrier homolog 1 (C. elegans) (Mtch1		11.064	11.1617	11.0798	11.17	10.8511	11.3339	11.0301	10.5116	10.7804	10.9914	11.4751	11.2733	11.1283	11.1731	10.8151	11.1118	11.4935	10.9495	11.1382	11.1433	10.933	11.2476	10.7918	11.0031	11.1069	11.1117	10.9166	10.8338	11.1058	10.5862	11.0199	11.0156	11.2558	11.2304	10.7914	11.1753	10.9754	11.204	10.761	10.8202	11.0439
chr17	23941996	23950180	17334184	NM_011321 // Sbp // spermine binding protein // 17 A3.3|17 // 20234 /// ENSMUST00000024	Sbp	NM_011321	NM_011321 // RefSeq // Mus musculus spermine binding protein (Sbp), mRNA. // chr17 // 1		10.8604	5.73132	6.42532	6.09469	5.63149	5.72721	5.95993	6.27409	6.46435	5.89444	5.81548	5.8561	5.70921	5.95076	6.03374	8.52587	5.9812	6.39868	5.80255	6.0342	6.01901	5.98172	6.18275	6.11213	5.59046	6.0153	5.72533	5.77788	6.08919	11.6534	6.15685	6.37927	5.99413	5.89864	5.9315	6.0822	6.02406	6.26312	5.94921	6.0061	5.82322
chr17	33685692	33718677	17343602	NM_145486 // March2 // membrane-associated ring finger (C3HC4) 2 // 17 B1|17 // 224703	2009-03-01	NM_145486	NM_145486 // RefSeq // Mus musculus membrane-associated ring finger (C3HC4) 2 (March2),		8.30166	8.38105	7.67901	8.15228	8.50583	7.81854	7.92541	8.53408	8.12416	7.6877	7.85976	7.92469	7.56738	7.6943	7.89926	8.21903	8.12047	8.03379	8.08448	8.13178	8.07694	7.96637	7.96177	8.33402	7.96935	8.01795	7.8824	7.78229	7.64805	7.95641	7.95361	8.0188	7.93062	7.9273	7.89216	7.91726	7.9111	7.93749	8.19246	7.9691	7.76947
chr17	35194439	35196320	17337024	NM_008518 // Ltb // lymphotoxin B // 17 B1|17 19.06 cM // 16994 /// ENSMUST00000025262	Ltb	NM_008518	NM_008518 // RefSeq // Mus musculus lymphotoxin B (Ltb), mRNA. // chr17 // 100 // 100 /		5.81948	5.93691	5.85422	5.75534	5.80147	6.27351	5.91709	6.4068	5.99056	5.48714	6.2189	6.07274	5.94118	6.04273	5.97322	5.81637	5.98899	6.1134	6.21701	5.943	6.17013	5.99666	5.88076	6.41843	5.88016	5.97659	5.77042	5.81511	6.00028	6.20736	6.02812	5.96631	5.97687	5.75467	6.37717	5.55062	6.21051	6.02344	5.9789	6.05592	5.81449
chr17	24696234	24700530	17334381	ENSMUST00000126319 // Tbl3 // transducin (beta)-like 3 // 17 A3.3|17 // 213773 /// NM_0	Tbl3	ENSMUST00000126319	ENSMUST00000126319 // ENSEMBL // cdna:known chromosome:NCBIM37:17:24834894:24844605:-1		6.68499	6.56946	6.31892	6.65246	6.53074	6.29346	6.54234	7.05593	7.14874	6.67068	6.11743	6.68915	6.42891	6.32242	6.64331	6.59554	6.78442	6.29949	6.38495	6.63896	7.58913	6.44314	6.73519	8.21976	6.43716	6.47895	6.56251	6.74842	6.30014	6.9999	6.72259	6.24669	6.73979	6.41349	6.79153	6.24943	6.71147	6.85723	6.60411	6.56509	6.3045
chr17	17830352	17830444	17333707	NR_029730 // Mirlet7e // microRNA let7e // 17|17 // 387248	Mirlet7e	NR_029730	NR_029730 // RefSeq // Mus musculus microRNA let7e (Mirlet7e), microRNA. // chr17 // 10		4.60062	4.70008	5.14766	4.646	5.25087	5.76252	5.00189	4.9813	4.71648	5.32553	5.32166	5.31498	5.69893	4.72411	5.58515	4.21305	5.50902	4.61084	5.56596	4.53352	4.41212	5.14937	4.92048	4.70939	4.51184	5.04161	5.24804	4.78429	4.835	4.95744	5.27494	5.32464	5.12266	4.99456	4.75385	5.01032	5.321	4.7297	5.07376	4.32484	5.01541
chr17	34203527	34216321	17336458	ENSMUST00000025197 // Tap2 // transporter 2, ATP-binding cassette, sub-family B (MDR/TA	Tap2	ENSMUST00000025197	ENSMUST00000025197 // ENSEMBL // cdna:known chromosome:NCBIM37:17:34340472:34353266:1 g		7.16601	6.89729	7.20413	6.92168	6.90995	7.43252	6.32881	8.19144	8.12745	7.05777	7.54378	7.89202	7.49599	7.32358	7.46128	7.02195	7.40473	6.65347	6.61129	7.51939	8.81488	7.41863	7.17778	8.81671	6.28628	6.44656	6.77419	7.31548	6.48103	8.31844	6.20481	8.09057	6.61982	7.6613	6.49197	6.84165	6.11777	6.3279	6.57094	6.5943	6.21038
chr17	26676396	26699647	17334948	NM_025272 // Atp6v0e // ATPase, H+ transporting, lysosomal V0 subunit E // 17 A3.3|17 /	Atp6v0e	NM_025272	NM_025272 // RefSeq // Mus musculus ATPase, H+ transporting, lysosomal V0 subunit E (At		10.0445	10.0729	9.34489	9.79923	10.1432	9.76634	9.97134	10.0659	10.1658	9.95732	9.89619	9.64348	9.48793	9.53372	9.44774	9.74738	9.72313	9.52753	9.9385	10.1617	10.2293	9.9898	9.85978	10.1458	9.8982	9.64151	9.76852	9.73887	9.97721	10.0804	10.0835	9.4129	9.85559	9.83208	9.84695	9.89403	9.38065	9.11702	9.8785	9.92123	9.27209
chr17	34837019	34839233	17336725	ENSMUST00000046244 // Dom3z // DOM-3 homolog Z (C. elegans) // 17 B1|17 // 112403 /// N	Dom3z	ENSMUST00000046244	ENSMUST00000046244 // ENSEMBL // cdna:known chromosome:NCBIM37:17:34973964:34976178:1 g		8.18157	7.92044	7.74402	8.07579	7.87094	7.86743	7.8509	8.28798	8.54877	7.96798	8.03393	7.92126	8.11303	7.88356	7.99773	7.89156	8.32833	8.0079	7.87978	7.92792	8.12971	8.11464	7.881	8.33874	7.76943	8.10569	7.77066	7.72961	8.01475	8.10805	7.8258	7.61807	7.97794	7.8043	8.0521	7.92436	7.70425	7.9468	8.05406	8.13422	7.97584
chr17	22424222	22456689	17334009	NM_198003 // Zfp946 // zinc finger protein 946 // 17 A3.3|17 // 74149 /// ENSMUST000001	Zfp946	NM_198003	NM_198003 // RefSeq // Mus musculus zinc finger protein 946 (Zfp946), mRNA. // chr17 //		7.85477	7.57132	8.48652	8.05755	8.12772	7.84057	8.17004	6.79112	7.45877	7.74236	7.86272	8.50303	7.72405	8.46822	7.48237	7.80144	8.8433	7.5574	7.76887	8.02518	7.7603	8.09884	7.29982	7.58191	8.1262	7.9317	8.419	7.78242	8.3016	7.64495	8.39672	7.9709	8.20837	8.51872	8.18544	8.48137	8.13038	8.18364	8.24806	7.56105	8.46981
chr17	6430073	6436296	17332915	NM_009342 // Dynlt1b // dynein light chain Tctex-type 1D // 17 A1|17 3.1 cM // 21648 //	Dynlt1b	NM_009342	NM_009342 // RefSeq // Mus musculus dynein light chain Tctex-type 1D (Dynlt1b), mRNA. /		11.9128	11.9208	11.8066	11.9239	11.7609	11.8055	11.8633	11.2878	11.4712	11.738	11.8418	11.9564	11.7173	11.8908	11.7953	11.8178	12.128	11.8005	11.7364	11.6679	11.2369	11.7482	11.6578	11.753	11.8723	11.9087	11.9426	11.8959	11.8986	11.4374	11.8592	11.9818	11.9302	11.8407	11.5203	11.8113	11.8423	12.0252	11.9026	11.8863	11.906
chr17	21528194	21535878	17341361	AK033993 // 9330136K24Rik // RIKEN cDNA 9330136K24 gene // 17|17 // 319870	9330136K24Rik	AK033993	AK033993 // GenBank HTC // Mus musculus adult male diencephalon cDNA, RIKEN full-length		4.65191	5.17029	5.23646	4.50468	4.44724	4.64349	4.76687	4.91792	4.44678	4.7049	4.92157	5.17787	4.77125	5.15556	4.8036	4.56243	5.3027	4.60551	4.70566	4.97649	4.83011	4.76612	4.78337	4.86386	5.39535	5.34135	5.56007	5.18477	5.06251	4.13787	5.01844	4.72047	4.92997	4.70871	4.7068	5.21174	5.15983	5.15895	4.81408	4.89011	4.7273
chr17	35892677	35897431	17344456	ENSMUST00000148721 // 2310061I04Rik // RIKEN cDNA 2310061I04 gene // 17 B1|17 // 69662	2310061I04Rik	ENSMUST00000148721	ENSMUST00000148721 // ENSEMBL // cdna:known chromosome:NCBIM37:17:36029622:36034376:-1		7.67681	8.19677	7.89292	7.6741	7.59548	7.73938	7.68611	7.62315	7.94521	8.00003	7.70855	7.95336	7.99226	7.64692	8.26722	7.34772	8.29082	8.00421	7.73867	7.95108	7.69087	7.89698	7.64498	7.70714	7.42536	7.91237	7.43242	7.44573	8.09546	7.50119	7.6976	7.86186	7.89895	8.01345	7.80638	7.84371	7.56224	7.85185	8.23691	7.98391	7.78884
chr17	28587648	28622521	17342897	ENSMUST00000130643 // Srpk1 // serine/arginine-rich protein specific kinase 1 // 17 A3.	Srpk1	ENSMUST00000130643	ENSMUST00000130643 // ENSEMBL // cdna:known chromosome:NCBIM37:17:28724593:28759466:-1		10.2405	10.2817	10.331	10.2321	10.1735	10.2969	10.4251	9.81157	10.1373	10.3438	10.2438	10.501	10.3882	10.3692	10.5418	10.4535	10.7641	10.4733	10.2145	10.2913	10.1404	10.3087	10.1545	10.1346	10.4303	10.3795	10.4064	10.18	10.5821	10.0633	10.4647	10.2887	10.4121	10.7082	10.4724	10.4934	10.5401	10.4198	10.4347	10.4524	10.2788
chr17	35681567	35704621	17344405	NM_007584 // Ddr1 // discoidin domain receptor family, member 1 // 17 C|17 21.5 cM // 1	Ddr1	NM_007584	NM_007584 // RefSeq // Mus musculus discoidin domain receptor family, member 1 (Ddr1),		8.97042	8.68886	8.75664	9.0505	8.60936	9.00836	8.81817	9.19213	9.14989	8.03754	8.40793	8.66309	8.73112	8.94035	8.77173	8.68999	8.89816	8.75659	8.80343	8.6998	9.42965	8.72141	8.63908	9.09534	8.60042	8.73626	8.51294	8.69497	7.96591	8.81799	8.95471	8.12386	8.70201	8.95722	8.75623	8.86204	8.66459	9.05439	8.21295	8.29072	8.78248
chr17	33773750	33781575	17343628	ENSMUST00000002360 // Angptl4 // angiopoietin-like 4 // 17 B1|17 // 57875 /// NM_020581	Angptl4	ENSMUST00000002360	ENSMUST00000002360 // ENSEMBL // cdna:known chromosome:NCBIM37:17:33910695:33918520:-1		5.51913	6.59296	6.87022	5.66565	7.63557	5.82897	5.79837	5.97933	6.43193	5.55347	5.48197	6.01302	6.38355	6.19233	5.92723	5.56485	5.97551	6.46376	6.85855	7.05357	6.4551	5.66706	6.36101	6.61303	5.54113	5.83765	5.69823	5.92315	5.50623	6.16994	6.42093	5.52821	6.40357	5.90263	5.60964	6.05254	5.99636	5.86708	6.19785	6.33693	5.75404
chr17	35049966	35058749	17336896	ENSMUST00000007257 // Clic1 // chloride intracellular channel 1 // 17 B1|17 19.0 cM //	Clic1	ENSMUST00000007257	ENSMUST00000007257 // ENSEMBL // cdna:known chromosome:NCBIM37:17:35186911:35195694:1 g		9.76643	9.91014	10.0184	10.2267	10.0579	10.1561	10.2209	9.2917	10.0808	10.512	9.97349	9.9673	10.029	9.37509	10.5225	9.94717	9.53539	9.99396	10.217	10.042	9.97648	10.0126	9.6097	10.016	9.70835	10.1813	9.53282	9.75339	10.1127	9.37457	9.6678	9.68967	10.0413	9.87064	9.9896	10.0562	9.49535	9.56107	9.98289	10.1741	9.43462
chr17	22689771	22689941	17334028	AB010339 // Gm9805 // predicted gene 9805 // 17 A3.3|17 // 194612 /// AB010339 // Gm980	Gm9805	AB010339	AB010339 // GenBank // Mus musculus mRNA for mszf58, partial cds. // chr17 // 92 // 100		5.02938	2.71534	3.85386	3.85594	3.61244	2.76322	4.20134	2.78688	2.62743	3.52923	3.09604	3.0868	3.76929	2.59953	3.92513	3.04643	5.31407	3.85517	4.57146	4.26054	2.83853	3.09988	2.68111	2.42202	3.42107	2.70845	6.23555	5.28411	5.98677	2.66851	4.73472	2.72126	2.54108	2.8032	2.67157	5.01301	4.53639	4.50958	4.95807	3.32413	3.03123
chr17	31386234	31476310	17335842	NM_008804 // Pde9a // phosphodiesterase 9A // 17 B1|17 // 18585 /// NM_001163748 // Pde	Pde9a	NM_008804	NM_008804 // RefSeq // Mus musculus phosphodiesterase 9A (Pde9a), transcript variant 1,		8.69751	8.48688	8.05168	7.7593	6.59158	7.65474	7.6845	9.07811	9.41863	7.23522	8.03756	8.54771	8.75011	8.08907	8.15333	9.49183	9.80645	8.55197	7.38059	7.46918	9.04458	7.99152	8.72582	9.67322	8.60879	6.68433	6.76	8.82767	8.88857	9.72269	7.43242	8.08686	7.30634	8.70398	9.98732	6.44287	7.7891	9.07003	7.55961	7.43925	9.16424
chr17	22995714	22997792	17334037	AB540949 // Vmn2r113 // vomeronasal 2, receptor 113 // 17 A3.3|17 // 434701 /// ENSMUST	Vmn2r113	AB540949	AB540949 // GenBank // Mus musculus domesticus V2Rp7 mRNA for vomeronasal 2 receptor p7		3.18512	3.14501	3.29124	4.21941	3.21642	3.10029	3.25633	3.42715	2.99438	3.59628	3.25728	3.21339	3.24609	3.09027	3.4299	3.22002	3.11902	3.10934	3.21428	3.1047	3.1386	3.1914	3.40887	3.11937	3.12265	3.04906	3.24005	3.35836	3.30159	3.24012	3.06445	3.57621	3.26106	3.15757	3.32389	3.16983	3.29571	3.22762	3.06287	3.24673	3.64106
chr17	23064374	23066470	17334042	AB540949 // Vmn2r113 // vomeronasal 2, receptor 113 // 17 A3.3|17 // 434701 /// ENSMUST	Vmn2r113	AB540949	AB540949 // GenBank // Mus musculus domesticus V2Rp7 mRNA for vomeronasal 2 receptor p7		3.18512	3.14501	3.29124	4.21941	3.21642	3.10029	3.25633	3.42715	2.99438	3.59628	3.25728	3.21339	3.24609	3.09027	3.4299	3.22002	3.11902	3.10934	3.21428	3.1047	3.1386	3.1914	3.40887	3.11937	3.12265	3.04906	3.24005	3.35836	3.30159	3.24012	3.06445	3.57621	3.26106	3.15757	3.32389	3.16983	3.29571	3.22762	3.06287	3.24673	3.64106
chr17	25794571	25797136	17342386	NM_133719 // Metrn // meteorin, glial cell differentiation regulator // 17 A3.3|17 // 7	Metrn	NM_133719	NM_133719 // RefSeq // Mus musculus meteorin, glial cell differentiation regulator (Met		7.10092	8.45262	7.60572	8.17159	7.81536	8.55384	7.38629	6.96566	6.98362	7.17103	8.61612	8.67659	7.94178	7.20165	8.23589	7.38021	7.28746	6.96193	7.6939	7.48493	6.88851	8.05676	7.36219	7.20565	7.21105	7.07982	6.93118	6.77328	7.61444	6.66259	7.62957	7.68932	8.08395	7.1846	7.22118	8.15034	6.67028	7.1942	6.63116	6.67285	7.69474
chr17	25926424	25944510	17342509	ENSMUST00000026823 // Pigq // phosphatidylinositol glycan anchor biosynthesis, class Q	Pigq	ENSMUST00000026823	ENSMUST00000026823 // ENSEMBL // cdna:known chromosome:NCBIM37:17:26063373:26078993:-1		9.58958	9.28084	9.30225	9.1598	9.6472	9.35205	9.2977	9.95768	9.69412	9.17731	9.09724	9.39022	9.01318	9.55705	9.05999	9.60641	9.57535	9.07777	9.08339	9.37978	9.50927	9.16712	9.49574	9.73267	9.61955	9.29775	8.88192	9.29826	9.30801	9.15664	9.24011	9.37496	9.1864	9.69113	9.57109	9.21888	9.19635	9.38817	9.36304	9.19729	9.00889
chr17	33938821	33940343	17343678	ENSMUST00000025163 // H2-Ke2 // H2-K region expressed gene 2 // 17 B1|17 18.41 cM // 14	H2-Ke2	ENSMUST00000025163	ENSMUST00000025163 // ENSEMBL // cdna:known chromosome:NCBIM37:17:34075766:34077288:-1		8.7774	8.6559	9.02029	8.78963	8.59964	8.36022	8.62972	8.19422	8.2331	8.73601	8.41108	9.09974	8.45851	8.82336	8.79033	8.66389	9.26033	8.40978	8.70131	8.85409	8.23806	8.55338	8.28245	8.524	8.22883	8.67702	8.89562	8.55278	8.82559	7.93448	8.91899	8.52653	8.65477	8.99153	8.4506	8.91851	8.88419	8.80289	9.10309	9.2038	8.7189
chr17	32183770	32189549	17343334	NM_001033163 // Ephx3 // epoxide hydrolase 3 // 17 B1|17 // 71932 /// ENSMUST0000008772	Ephx3	NM_001033163	NM_001033163 // RefSeq // Mus musculus epoxide hydrolase 3 (Ephx3), mRNA. // chr17 // 1		6.26375	6.15712	5.88264	6.51055	6.34609	6.124	6.26689	5.85286	5.65889	5.89287	6.13269	6.32173	6.69579	6.18915	6.27067	6.4553	6.32135	6.16057	6.2159	6.65372	6.02772	5.88999	6.16226	5.5766	6.66385	6.30585	6.57767	5.82038	6.00306	5.64905	6.37441	6.25023	6.06942	6.59076	6.03243	6.24129	6.64176	6.25752	5.91966	5.74832	6.28427
chr17	21707741	21725636	17333966	NM_001008501 // Zfp760 // zinc finger protein 760 // 17 A3.2-A3.3|17 // 240034 /// ENSM	Zfp760	NM_001008501	NM_001008501 // RefSeq // Mus musculus zinc finger protein 760 (Zfp760), mRNA. // chr17		8.62169	8.88796	9.2225	8.15576	8.63926	8.40359	9.24955	7.71635	8.20533	8.86919	8.77827	9.04774	8.9896	9.18796	7.18317	9.35366	9.06035	8.3818	8.0905	9.17884	8.47029	8.89293	8.45241	8.94656	8.87063	9.1383	9.58611	8.7877	9.29567	8.54306	9.4736	9.08969	9.01568	9.34423	9.0902	9.44821	9.46313	9.34349	9.28161	9.05326	9.47069
chr17	35470089	35474563	17337142	ENSMUST00000174525 // H2-Q10 // histocompatibility 2, Q region locus 10 // 17 B1|17 19.	H2-Q10	ENSMUST00000174525	ENSMUST00000174525 // ENSEMBL // cdna:known chromosome:NCBIM37:17:35607034:35611508:1 g		4.67545	4.0859	4.54728	4.00806	4.56081	4.66544	4.32755	4.94101	5.11077	4.13871	4.32424	4.5617	4.26872	4.77201	4.98175	4.48143	4.439	4.4741	4.6803	4.63945	5.53281	4.46324	4.28266	5.25211	4.4668	4.47211	4.51141	4.46098	4.36485	5.35179	4.42034	4.59981	4.61631	4.6184	4.27509	4.50089	4.85715	4.3571	4.13351	4.19475	4.04743
chr17	21383748	21399265	17333906	NM_172486 // Zfp677 // zinc finger protein 677 // 17 A3.2|17 // 210503 /// ENSMUST00000	Zfp677	NM_172486	NM_172486 // RefSeq // Mus musculus zinc finger protein 677 (Zfp677), mRNA. // chr17 //		4.05003	3.24522	4.31636	4.28491	4.00384	3.33031	3.49142	4.07459	4.94114	3.32593	3.21524	4.54739	3.71536	4.55698	3.11311	4.01182	4.5226	3.37531	3.87797	4.7406	4.83461	3.99402	3.83983	4.88701	4.52699	3.35942	4.679	4.14397	3.76562	4.93867	4.88046	3.98624	3.71049	4.69667	3.89786	4.46667	4.2862	4.17733	4.13487	3.64158	3.72666
chr17	34616662	34628510	17343897	ENSMUST00000169067 // Ppt2 // palmitoyl-protein thioesterase 2 // 17 B1|17 18.9 cM // 5	Ppt2	ENSMUST00000169067	ENSMUST00000169067 // ENSEMBL // cdna:known chromosome:NCBIM37:17:34754174:34764470:-1		7.94121	7.585	7.52012	7.96145	7.51576	7.66866	7.57523	8.24511	8.09893	7.76317	7.46772	7.58244	7.71958	7.65662	7.77087	7.82645	7.96766	8.12007	7.1962	7.77134	8.01624	7.44891	7.71331	8.1414	7.87668	7.81732	7.45247	7.44333	7.40081	8.18464	7.35128	7.53577	7.05463	8.02818	7.58391	7.66143	7.23011	7.72973	7.27313	7.65162	7.64439
chr17	12966796	12992546	17340983	NM_001113533 // Wtap // Wilms' tumour 1-associating protein // 17 A1|17 // 60532 /// EN	Wtap	NM_001113533	NM_001113533 // RefSeq // Mus musculus Wilms' tumour 1-associating protein (Wtap), tran		9.04768	9.3017	9.12379	8.8219	9.10689	9.15294	9.35208	9.00472	8.81143	9.34861	9.10869	9.41901	9.2728	9.39994	9.11365	9.3509	9.77633	9.11797	9.23533	9.2602	9.22059	9.08575	9.16253	9.11084	9.41831	9.3197	9.71085	9.56589	9.33689	9.25137	9.37222	9.35168	9.4163	9.59108	9.25604	9.5036	9.5969	9.28355	9.36619	9.37978	9.43567
chr17	27909340	28062637	17335204	NM_181413 // Anks1 // ankyrin repeat and SAM domain containing 1 // 17 A3.3|17 // 22465	Anks1	NM_181413	NM_181413 // RefSeq // Mus musculus ankyrin repeat and SAM domain containing 1 (Anks1),		8.33636	7.75749	7.82633	8.21184	7.92061	8.09033	7.84225	8.26693	8.45166	7.9471	7.98046	7.8566	8.07476	7.98302	8.67715	8.13521	8.39213	8.17962	8.13291	8.05996	8.50975	7.84016	8.00773	8.48436	7.90094	7.88439	7.99698	7.66818	7.69275	8.19051	8.0919	7.57553	7.81349	8.2991	7.85252	8.06452	7.87787	7.97689	8.22305	8.02447	8.02999
chr17	12919585	12919722	17333342	ENSMUST00000129632 // Tcp1 // t-complex protein 1 // 17 A3-B|17 7.5 cM // 21454 /// ENS	Tcp1	ENSMUST00000129632	ENSMUST00000129632 // ENSEMBL // cdna:known chromosome:NCBIM37:17:13109315:13117428:1 g		5.71286	6.03386	6.58681	4.97508	6.19863	5.23974	6.35229	5.13359	5.94712	6.25685	5.98257	6.19044	6.10823	6.14462	6.27404	4.65392	6.76518	5.95226	6.16287	5.9683	6.24837	6.15023	5.74193	5.91056	5.99134	6.24308	6.58529	6.25773	5.86486	5.14473	6.29419	6.22331	7.13014	6.57788	6.00764	6.53735	6.2563	6.25068	6.67263	6.22514	6.18182
chr17	35772450	35780687	17337224	NR_045459 // 4833427F10Rik // RIKEN cDNA 4833427F10 gene // 17|17 // 74601	4833427F10Rik	NR_045459	NR_045459 // RefSeq // Mus musculus RIKEN cDNA 4833427F10 gene (4833427F10Rik), non-cod		5.60077	5.39943	5.83067	5.21656	5.48138	5.74252	5.43945	6.06776	6.71587	5.17206	5.8207	5.69444	5.5482	5.76363	5.48958	5.32731	5.6096	5.61009	5.29378	5.36838	5.94968	5.52266	5.54786	5.59119	5.64612	5.42704	5.81606	5.44251	5.39326	6.22389	5.35563	5.57059	5.71525	5.9617	5.61214	5.19275	5.75504	5.55402	5.8056	5.93299	5.45679
chr17	35116195	35122053	17344221	NM_009975 // Csnk2b // casein kinase 2, beta polypeptide // 17 B1|17 19.02 cM // 13001	Csnk2b	NM_009975	NM_009975 // RefSeq // Mus musculus casein kinase 2, beta polypeptide (Csnk2b), mRNA. /		10.321	10.5425	10.6303	10.446	10.5147	10.4995	10.5511	10.3893	10.3605	10.5712	10.3893	10.6429	10.549	10.4694	10.539	10.3782	10.9614	10.2048	10.7027	10.4276	10.1638	10.6453	10.4312	10.3195	10.3096	10.5035	10.5177	10.462	10.566	10.222	10.4135	10.3067	10.5641	10.6187	10.3147	10.5914	10.3708	10.5677	10.5654	10.7154	10.28
chr17	15041612	15064232	17333521	NM_001034891 // 2210404J11Rik // RIKEN cDNA 2210404J11 gene // 17 A2|17 // 381062 /// E	2210404J11Rik	NM_001034891	NM_001034891 // RefSeq // Mus musculus RIKEN cDNA 2210404J11 gene (2210404J11Rik), tran		7.14232	7.43514	7.49753	7.01044	7.33285	6.88354	7.53694	7.3769	7.41395	7.57944	7.22689	7.38955	7.31501	7.36711	7.36908	7.75411	7.47131	7.01288	7.24314	7.25471	7.13585	7.30805	7.61798	7.3032	7.39632	7.5878	7.34976	7.58549	7.5387	7.51872	7.62654	7.58802	7.51726	7.47253	7.56697	7.77358	7.68063	7.51716	7.27082	7.40264	7.77132
chr17	23752798	23771591	17341608	NM_153791 // Flywch1 // FLYWCH-type zinc finger 1 // 17 A3.3|17 // 224613 /// ENSMUST00	Flywch1	NM_153791	NM_153791 // RefSeq // Mus musculus FLYWCH-type zinc finger 1 (Flywch1), mRNA. // chr17		8.1082	8.47893	8.27593	7.76103	7.88822	8.15883	8.26095	7.47284	7.69342	8.36946	8.10753	8.25212	8.24678	8.11869	8.51225	8.15166	8.86163	8.183	8.19166	8.33893	7.45494	8.25513	7.87207	7.8473	7.86946	8.30893	8.08826	7.7951	7.88678	7.57545	8.0259	8.09345	8.24161	8.03794	8.26129	8.07872	7.92689	8.45319	8.25976	8.28319	8.53438
chr17	34956429	34959238	17344126	NM_010478 // Hspa1b // heat shock protein 1B // 17 B1|17 18.9 cM // 15511 /// ENSMUST00	Hspa1b	NM_010478	NM_010478 // RefSeq // Mus musculus heat shock protein 1B (Hspa1b), mRNA. // chr17 // 1		8.79056	7.91383	7.86818	6.8823	9.37335	7.80113	7.72286	11.0022	10.1819	7.73292	7.25654	7.90486	7.85841	7.7586	9.39754	6.65809	6.82789	5.77802	8.82984	10.7362	11.9229	8.727	9.566	9.08377	7.87135	6.64204	6.67074	8.52793	7.41803	10.0642	8.15677	6.65	7.58289	9.12927	7.11139	8.59504	6.42892	5.79418	7.6229	7.21617	7.39557
chr17	13760539	13906150	17333418	ENSMUST00000139666 // Mllt4 // myeloid/lymphoid or mixed-lineage leukemia (trithorax ho	Mllt4	ENSMUST00000139666	ENSMUST00000139666 // ENSEMBL // cdna:known chromosome:NCBIM37:17:13897555:14043157:1 g		9.65464	9.84318	9.83887	9.51989	9.67228	9.57579	9.58484	9.53324	9.86903	9.58362	9.65988	9.64006	9.62474	9.70637	9.82733	9.99962	10.3298	10.2688	9.67684	9.92543	10.3529	10.1034	9.87471	9.95491	9.78293	9.62178	9.57469	9.6658	9.75798	9.76178	9.66388	9.59567	9.7071	10.0955	10.0474	9.51561	9.71662	9.4818	9.67899	9.54063	9.92037
chr17	20945311	20965916	17333854	ENSMUST00000007708 // Ppp2r1a // protein phosphatase 2 (formerly 2A), regulatory subuni	Ppp2r1a	ENSMUST00000007708	ENSMUST00000007708 // ENSEMBL // cdna:known chromosome:NCBIM37:17:21082275:21102880:1 g		11.5067	11.7292	11.7492	11.66	11.456	11.8267	11.664	11.3512	11.2549	11.6625	11.5852	11.7109	11.6239	11.5412	11.3099	11.7864	11.9674	11.4363	11.8169	11.6247	11.2737	11.5923	11.5459	11.4093	11.614	11.7418	11.4479	11.438	11.5358	11.2381	11.5456	11.4231	11.7596	11.7999	11.6744	11.6195	11.4624	11.7412	11.5203	11.865	11.6784
chr17	6310544	6317474	17340524	NM_001199948 // Dynlt1f // dynein light chain Tctex-type 1F // 17 A1|17 // 100040531 //	Dynlt1f	NM_001199948	NM_001199948 // RefSeq // Mus musculus dynein light chain Tctex-type 1F (Dynlt1f), tran		12.4148	12.3841	12.3275	12.3905	12.1947	12.3144	12.4026	11.8031	11.9927	12.2486	12.346	12.395	12.2128	12.4103	12.3843	12.2895	12.5522	12.391	12.2114	12.1742	11.9042	12.2349	12.1635	12.2532	12.415	12.3906	12.4043	12.3565	12.4268	11.9163	12.3285	12.4771	12.4039	12.3758	12.089	12.2528	12.2672	12.5209	12.3796	12.377	12.3923
chr17	34862602	34898452	17344086	NM_013484 // C2 // complement component 2 (within H-2S) // 17 B1|17 18.86 cM // 12263 /	C2	NM_013484	NM_013484 // RefSeq // Mus musculus complement component 2 (within H-2S) (C2), mRNA. //		5.21037	4.64331	4.74048	4.26669	4.66402	4.59065	4.78796	5.96234	6.21982	5.02813	4.30656	5.20851	4.81751	4.73738	5.2589	4.60191	4.82777	5.0266	4.84423	5.34974	6.39861	4.40693	5.40398	5.88533	4.63931	4.6361	5.00466	5.49846	4.77736	5.71046	5.30387	4.8141	4.69986	5.53203	4.64894	4.13267	4.75027	4.48156	4.39133	4.52766	4.35049
chr17	29250803	29264158	17343026	ENSMUST00000024802 // Ppil1 // peptidylprolyl isomerase (cyclophilin)-like 1 // 17 A3.3	Ppil1	ENSMUST00000024802	ENSMUST00000024802 // ENSEMBL // cdna:known chromosome:NCBIM37:17:29387748:29401103:-1		7.66012	8.21985	8.19562	8.90902	7.66639	8.11862	8.00212	6.95459	7.6555	8.20398	8.2063	7.86639	8.43477	8.20282	8.31794	8.63713	8.51614	7.92403	8.20837	8.06713	7.6632	8.19691	7.53575	8.00278	7.86217	7.97876	8.2675	7.76885	8.35564	7.42734	8.1877	7.62896	8.2233	8.17917	7.65048	8.26984	8.11097	8.21274	8.17495	8.18085	8.25273
chr17	31494322	31519974	17343207	ENSMUST00000171171 // Wdr4 // WD repeat domain 4 // 17 B1|17 // 57773 /// NM_021322 //	Wdr4	ENSMUST00000171171	ENSMUST00000171171 // ENSEMBL // cdna:known chromosome:NCBIM37:17:31631268:31649696:-1		6.44708	6.82896	6.80321	6.97094	6.64235	6.78334	6.58363	6.78201	6.61992	6.62366	6.76368	6.95666	6.85624	6.50964	6.7524	7.03731	7.28755	6.59518	7.05635	6.74382	6.86755	6.95149	6.65852	7.09677	6.87139	6.72009	6.85768	6.68073	6.81475	6.84722	7.05376	6.68182	7.11902	6.93332	6.44347	7.01786	6.93608	6.85689	6.95066	6.96868	7.02348
chr17	31057694	31117984	17335770	NM_009593 // Abcg1 // ATP-binding cassette, sub-family G (WHITE), member 1 // 17|17 //	Abcg1	NM_009593	NM_009593 // RefSeq // Mus musculus ATP-binding cassette, sub-family G (WHITE), member		8.75184	7.91801	8.37708	8.68045	8.87095	8.65017	8.61336	7.46714	7.82786	8.81359	8.23812	8.4866	8.75546	8.38132	8.03553	8.74435	8.83693	9.06812	8.7484	8.84799	8.69551	7.99512	8.51098	8.48	8.52047	8.26661	8.71054	8.52846	8.01232	7.33748	9.16896	8.52735	9.09284	8.6696	9.48695	8.35327	8.50561	8.85467	7.31954	8.03917	8.4345
chr17	35247175	35247250	17337063	---		---	ENSMUST00000083339 // ENSEMBL // ncrna:snoRNA chromosome:NCBIM37:17:35384120:35384195:1		6.87001	7.14923	6.43497	7.51917	7.38684	7.38032	6.92443	6.22227	7.02258	6.95809	7.24986	7.02324	8.01209	6.84682	7.67114	6.87042	7.05655	6.65861	7.01625	6.78386	7.16835	7.31329	6.96078	6.84175	7.00811	6.81737	7.32101	7.30355	6.68528	8.26125	7.14498	6.94389	7.76581	6.90388	6.58089	6.98037	7.29058	7.09324	7.86515	7.074	6.80949
chr17	3532554	3533213	17332728	NM_001101560 // Cldn20 // claudin 20 // 17 A1|17 // 621628 /// ENSMUST00000168560 // Cl	Cldn20	NM_001101560	NM_001101560 // RefSeq // Mus musculus claudin 20 (Cldn20), mRNA. // chr17 // 100 // 10		4.16479	4.4055	4.5142	4.78245	4.60603	4.08562	4.23695	4.79442	4.55585	4.30343	4.17479	4.32599	4.34022	4.46292	4.29256	4.47957	4.20303	4.25859	4.37824	3.9508	4.17425	4.11244	4.33611	4.414	4.25579	4.38133	4.25919	4.18155	4.28819	4.46797	4.01204	4.68365	4.3495	4.19899	4.41076	4.04573	4.00175	4.27809	4.02755	4.27969	4.16446
chr17	28523257	28525370	17335340	BC096647 // E230001N04Rik // RIKEN cDNA E230001N04 gene // 17 A3.3|17 // 320187	E230001N04Rik	BC096647	BC096647 // GenBank // Mus musculus RIKEN cDNA E230001N04 gene, mRNA (cDNA clone IMAGE:		5.59239	5.45233	5.60005	5.53516	5.13756	5.75358	5.26305	5.9295	6.72531	5.78314	5.52042	5.61936	5.48189	5.43787	5.39208	5.08185	5.70627	5.26533	5.22001	5.3193	6.51896	5.42641	6.00828	6.55506	5.53737	5.46238	5.32694	5.4666	5.50302	6.15027	5.59255	5.32934	5.3184	5.81014	6.1017	5.32678	5.12365	5.43618	5.23325	5.47285	5.1482
chr17	29156521	29237797	17342999	NM_153166 // Cpne5 // copine V // 17 A3.3|17 // 240058 /// ENSMUST00000024805 // Cpne5	Cpne5	NM_153166	NM_153166 // RefSeq // Mus musculus copine V (Cpne5), mRNA. // chr17 // 100 // 86 // 12		6.52327	7.16276	7.47733	7.73411	6.17991	8.13336	6.54596	5.6509	5.81055	7.38242	7.7752	8.32707	7.49063	7.61226	8.18918	7.83134	8.26182	7.25097	7.38282	7.53231	5.38075	8.0615	6.40409	6.4127	6.65018	7.24348	5.91465	6.70481	7.28209	7.34728	7.63888	8.3628	7.47644	7.77871	7.38385	6.63617	7.35473	7.12418	5.92928	6.00826	8.40838
chr17	25926421	25927372	17334833	NM_011822 // Pigq // phosphatidylinositol glycan anchor biosynthesis, class Q // 17|17	Pigq	NM_011822	NM_011822 // RefSeq // Mus musculus phosphatidylinositol glycan anchor biosynthesis, cl		4.61709	4.91073	4.90679	5.63941	4.94439	5.20697	5.13307	5.01711	4.87607	5.19348	5.59913	5.17521	5.50042	4.78236	4.80821	5.65014	5.10883	4.7164	4.86546	4.6075	4.78757	5.0659	4.77385	5.18872	4.63696	5.05617	5.15972	4.71298	5.14558	4.55177	4.81952	4.59107	5.29867	4.92759	4.88135	5.20233	4.82438	5.18721	5.16852	4.87262	4.70922
chr17	32685627	32703352	17336013	NM_134127 // Cyp4f15 // cytochrome P450, family 4, subfamily f, polypeptide 15 // 17 B1	Cyp4f15	NM_134127	NM_134127 // RefSeq // Mus musculus cytochrome P450, family 4, subfamily f, polypeptide		4.76049	5.90979	4.48951	3.92786	4.81038	4.44112	4.75033	7.26908	5.94788	4.52786	4.79167	4.5083	4.50012	4.58263	4.62362	4.63081	4.68434	4.65252	3.94739	4.52613	4.3191	4.37431	5.57667	4.60114	4.21993	4.02904	4.60959	4.99005	4.70738	4.22703	4.41583	5.09361	4.43211	6.43665	4.48553	4.44976	4.78197	4.26695	4.47024	4.21867	4.24889
chr17	33905135	33906675	17336209	BC027672 // BC033916 // cDNA sequence BC033916 // 17 B1|17 // 474160 /// BC027672 // BC	BC033916	BC027672	BC027672 // GenBank // Mus musculus cDNA sequence BC033916, mRNA (cDNA clone IMAGE:1265		3.93287	3.64706	3.91552	4.3167	3.85604	4.39627	3.90503	3.89704	4.03443	4.17558	4.71412	4.04697	3.9112	4.05018	4.40931	3.74999	4.02329	4.12939	4.18416	3.75455	3.9373	3.84137	3.98912	3.69307	4.13873	4.19846	4.10629	3.78105	4.21541	3.80796	4.10618	3.77219	3.88731	3.88499	4.02023	4.14653	3.86635	3.73678	3.73473	4.20807	3.68919
chr17	35916566	35932283	17337314	ENSMUST00000087211 // Ppp1r10 // protein phosphatase 1, regulatory subunit 10 // 17 B1|	Ppp1r10	ENSMUST00000087211	ENSMUST00000087211 // ENSEMBL // cdna:known chromosome:NCBIM37:17:36053511:36069217:1 g		8.74518	8.64723	8.46656	8.63668	8.67634	8.55152	8.5215	8.57575	8.78069	8.35997	8.18844	8.71389	8.83745	8.78745	8.8285	8.65978	8.70841	8.60536	8.4671	8.52128	8.98052	8.45755	8.68699	8.87929	8.71378	8.59533	8.34103	8.47605	8.63157	8.69662	8.48521	8.38043	8.06483	8.76244	8.64129	8.56423	8.62825	8.66334	8.77341	8.61876	8.72277
chr17	31912668	31913323	17547996	XR_141823 // LOC100862610 // uncharacterized LOC100862610 // --- // 100862610	LOC100862610	XR_141823	AK081434 // GenBank HTC // Mus musculus 16 days embryo head cDNA, RIKEN full-length enr		5.78112	5.56712	4.93269	5.72226	4.99105	5.23744	5.3366	5.84423	6.12761	5.39047	5.25004	5.11263	4.99177	5.11645	5.11144	5.48224	5.12444	5.28177	4.96058	5.11126	5.46876	4.94151	7.03487	5.52376	5.23087	4.85748	5.01772	5.73485	4.7309	5.57283	5.00079	5.30562	5.09796	5.53128	5.4078	4.82604	4.91456	4.97911	5.09893	5.30022	4.945
chr17	33289544	33304689	17336077	NM_001142957 // Zfp955b // zinc finger protein 955B // 17 B1|17 // 100043468	Zfp955b	NM_001142957	NM_001142957 // RefSeq // Mus musculus zinc finger protein 955B (Zfp955b), mRNA. // chr		9.12623	9.61853	9.73615	9.83267	9.48956	9.51717	9.66483	9.04424	9.15418	9.48912	9.96707	9.73929	9.78991	9.55359	8.0473	9.51644	10.1965	9.43722	9.76576	9.69782	9.29358	9.70904	9.21262	9.22329	9.71419	9.83277	10.0472	9.59001	10.0948	9.47396	9.74368	9.73113	9.60876	10.0617	8.70507	9.58826	9.49485	9.76465	9.73564	9.68148	10.019
chr17	26505590	26508519	17342642	ENSMUST00000025025 // Dusp1 // dual specificity phosphatase 1 // 17 A2-C|17 13.0 cM //	Dusp1	ENSMUST00000025025	ENSMUST00000025025 // ENSEMBL // cdna:known chromosome:NCBIM37:17:26642535:26645464:-1		8.099	8.6524	8.00114	8.2566	8.22615	8.17278	8.57888	7.60687	7.81343	8.87461	8.30761	8.33132	8.34559	7.739	8.7043	7.89766	8.18278	8.72866	8.45691	8.28089	7.16637	8.19039	8.48296	7.20468	7.99497	8.96356	7.82482	8.1855	7.9479	7.28534	8.03592	8.83251	8.78233	8.20807	8.5115	8.20284	8.00218	8.69007	8.14998	8.79149	8.08962
chr17	7945614	7979824	17333036	ENSMUST00000097423 // Rsph3a // radial spoke 3A homolog (Chlamydomonas) // 17 A1|17 //	Rsph3a	ENSMUST00000097423	ENSMUST00000097423 // ENSEMBL // cdna:known chromosome:NCBIM37:17:8138518:8172689:1 gen		8.38016	8.02167	8.36352	7.86625	8.20581	8.02039	8.08505	8.13425	8.05614	7.76885	8.20182	8.72355	8.20361	7.97647	6.96872	8.1371	8.91195	8.09981	8.18802	8.26197	7.97333	8.2657	8.18106	8.08019	8.5565	8.56613	8.40619	8.50178	8.44305	8.10964	8.53128	8.06759	8.49018	8.63101	7.0298	8.49195	8.62102	8.48105	8.1882	8.2957	8.57036
chr17	27556574	27563674	17335129	NM_016660 // Hmga1 // high mobility group AT-hook 1 // 17 A3.3|17 13.19 cM // 15361 ///	Hmga1	NM_016660	NM_016660 // RefSeq // Mus musculus high mobility group AT-hook 1 (Hmga1), transcript v		7.34593	7.08745	7.14889	7.096	6.96562	7.44138	7.21498	6.63042	6.50586	6.99996	7.39968	7.3667	7.26229	7.26557	7.72247	7.15801	7.41104	6.99265	7.02861	7.10354	5.90376	7.19068	6.39853	6.6914	6.87954	6.63909	7.04852	6.60554	7.43726	6.21882	7.17383	6.67762	7.37028	7.24518	6.97255	7.69693	6.91896	6.85979	7.00431	7.10367	6.87513
chr17	12232481	12271184	17333237	NM_011948 // Map3k4 // mitogen-activated protein kinase kinase kinase 4 // 17 A1|17 8.4	Map3k4	NM_011948	NM_011948 // RefSeq // Mus musculus mitogen-activated protein kinase kinase kinase 4 (M		5.13146	5.21109	5.33954	5.07447	5.28241	5.87593	4.84985	5.21127	4.97131	5.14216	6.19289	5.37254	6.76727	5.10784	5.52213	4.92567	5.66142	5.40862	5.7509	5.35043	5.26794	5.69246	5.08931	4.90076	4.67069	5.32974	5.48218	4.83019	5.12456	4.90909	5.32104	5.33569	6.06143	5.25751	5.13376	5.0549	5.01724	5.29104	5.26989	5.26931	5.07871
chr17	26223502	26223645	17334902	---		---	ENSMUST00000157648 // ENSEMBL // ncrna:snoRNA chromosome:NCBIM37:17:26360447:26360590:1		10.3526	10.0984	9.69597	10.2649	10.6513	9.63774	9.74494	10.1647	10.219	9.87617	9.91934	9.26904	10.1923	10.0121	10.2803	9.33272	9.79441	10.4389	10.2076	9.79449	10.231	9.52441	10.233	10.3349	9.93428	10.2535	10.5202	10.31	10.2048	9.95812	9.7333	9.61955	10.4886	9.75975	10.184	9.53304	9.97785	10.3	10.3843	10.627	9.32941
chr17	24877655	24882010	17334468	ENSMUST00000168131 // Igfals // insulin-like growth factor binding protein, acid labile	Igfals	ENSMUST00000168131	ENSMUST00000168131 // ENSEMBL // cdna:known chromosome:NCBIM37:17:25015203:25018955:1 g		5.41882	5.63421	5.43889	6.0355	5.7964	5.45828	5.56419	6.0738	5.44146	5.39813	5.90505	5.32933	5.63423	5.83369	5.40022	5.52627	5.51436	5.58588	5.30816	5.60242	5.28665	5.38007	5.56157	5.58845	5.51239	5.43878	5.57635	5.53746	5.60832	5.51902	5.37518	5.63515	5.66425	5.32704	5.63627	5.52538	5.86511	5.51899	5.40757	5.5796	5.64528
chr17	35655634	35667592	17344355	NM_175137 // Vars2 // valyl-tRNA synthetase 2, mitochondrial (putative) // 17 B1|17 //	Vars2	NM_175137	NM_175137 // RefSeq // Mus musculus valyl-tRNA synthetase 2, mitochondrial (putative) (		8.06252	7.96078	8.13172	7.7498	7.97816	7.8849	7.882	7.42026	8.20661	8.06015	7.53085	8.1193	7.66973	7.87252	8.51469	7.94364	8.19697	8.10993	8.01573	8.03344	8.03677	7.8847	7.71038	8.24533	7.90121	8.19939	7.68871	7.72862	7.92981	7.86149	7.78437	7.46423	7.83254	8.10259	8.215	7.90291	7.70779	8.10591	7.97102	7.97321	8.18278
chr17	33729509	33729584	17336170	---		---	ENSMUST00000158564 // ENSEMBL // ncrna:snRNA chromosome:NCBIM37:17:33866454:33866529:1		5.04081	5.02815	5.20479	5.56762	5.00315	4.531	5.08597	4.95164	5.0049	4.32589	4.76228	4.66378	4.54995	5.36392	5.09239	5.16111	4.89663	5.10915	4.90232	4.85136	5.2665	4.85664	4.57512	5.31364	5.04045	4.78866	5.11765	4.78574	4.89676	4.52583	4.99647	4.9704	4.42657	4.83516	5.16814	4.79705	4.72751	4.98717	5.14369	4.59911	5.0797
chr17	13759370	13760368	17341056	---		---	AK044118 // GenBank HTC // Mus musculus 10 days neonate cortex cDNA, RIKEN full-length		8.00681	7.71443	8.39319	8.2374	7.81562	7.27653	7.79456	6.93565	7.35277	7.02939	7.75907	7.77579	7.87949	7.94138	7.3045	8.16202	8.68252	7.51201	7.59098	7.6217	7.49014	8.19463	7.68805	7.31653	8.15974	7.91889	8.17426	7.63287	8.03637	7.12699	7.81705	7.30811	7.84458	8.03568	8.12192	7.69384	7.40812	7.99463	7.64239	7.45815	8.26411
chr17	33555707	33607764	17336114	NM_053214 // Myo1f // myosin IF // 17 B-C|17 17.5 cM // 17916 /// ENSMUST00000087605 //	Myo1f	NM_053214	NM_053214 // RefSeq // Mus musculus myosin IF (Myo1f), mRNA. // chr17 // 100 // 100 //		6.28479	5.79182	5.35327	5.12884	6.61629	5.83108	5.63576	6.36502	6.48458	5.5648	5.37994	6.16748	5.69386	6.20441	5.43426	5.17221	5.79162	6.0835	5.6397	6.86777	6.51371	5.45736	5.90314	5.73642	5.78292	5.7011	5.89183	5.74318	6.0535	6.56252	6.34414	5.73552	5.67743	6.19223	5.82095	5.77374	6.13629	5.69869	5.42178	5.74376	5.29399
chr17	21008941	21028857	17333872	NM_145483 // Zfp160 // zinc finger protein 160 // 17 A3.2|17 10.2 cM // 224585 /// ENSM	Zfp160	NM_145483	NM_145483 // RefSeq // Mus musculus zinc finger protein 160 (Zfp160), mRNA. // chr17 //		7.57352	7.74302	8.0237	7.51854	7.62529	7.20623	7.85748	7.14981	7.32836	7.50686	7.6331	7.82031	7.72449	8.0856	7.43516	8.05821	8.36423	7.58037	7.77042	7.71145	7.53984	7.75756	7.68831	7.52148	8.03243	7.80078	8.19198	8.1642	8.09758	7.49901	7.87818	7.72829	7.67774	8.37541	7.38346	7.88835	7.78195	7.91488	8.1691	7.78974	8.02086
chr17	35062693	35066184	17344192	NR_001462 // G6b // G6B protein // 17 B1|17 18.0 cM // 114763 /// NM_001191012 // AU023	G6b	NR_001462	NR_001462 // RefSeq // Mus musculus G6B protein (G6b), non-coding RNA. // chr17 // 100		6.49441	5.99798	6.47354	6.21724	6.40575	6.08434	6.0042	6.77544	6.57424	5.89618	6.39029	6.19707	6.05913	6.13097	6.41343	5.91403	6.36133	6.17054	5.94044	5.9897	6.48264	6.04824	6.30735	6.24486	6.13425	6.14904	6.15049	6.26635	5.92588	6.1253	5.99351	6.15359	6.25747	5.90795	6.20973	5.95038	6.33444	6.29354	5.86537	6.33983	5.89069
chr17	23843855	23859776	17334149	ENSMUST00000061725 // Prss32 // protease, serine, 32 // 17 A3.3|17 10.73 cM // 69814 //	Prss32	ENSMUST00000061725	ENSMUST00000061725 // ENSEMBL // cdna:novel chromosome:NCBIM37:17:23990510:23996743:1 g		6.76207	6.5635	6.408	5.67067	6.38853	6.33536	6.37367	6.39908	6.52248	6.57966	6.23405	6.31775	6.54308	6.47204	6.27214	6.1776	6.455	6.41283	6.48601	6.27645	6.56709	6.29482	6.62016	6.54093	6.24012	6.29917	6.45506	6.58094	6.31936	6.26286	6.37572	6.32815	6.64017	6.41008	6.69115	6.31237	6.53936	6.28689	6.60093	6.36767	6.30399
chr17	26123503	26126613	17334861	NM_024227 // Mrpl28 // mitochondrial ribosomal protein L28 // 17|17 B1 // 68611 /// ENS	Mrpl28	NM_024227	NM_024227 // RefSeq // Mus musculus mitochondrial ribosomal protein L28 (Mrpl28), nucle		7.8908	7.88685	8.05485	8.41862	8.05752	7.98807	7.87057	7.51299	7.68633	8.02638	8.02502	8.24455	7.99811	7.84583	8.36378	8.05597	8.49524	7.73741	8.05107	8.04437	7.62766	8.14424	7.62595	7.65723	7.71121	8.09347	8.0887	7.73136	8.10198	7.39436	8.00042	7.64465	8.41769	7.86777	7.38738	8.021	7.53818	8.09232	8.10853	8.0913	7.5861
chr17	35076902	35078804	17336929	NM_027366 // Ly6g6e // lymphocyte antigen 6 complex, locus G6E // 17 B2|17 // 70274 ///	Ly6g6e	NM_027366	NM_027366 // RefSeq // Mus musculus lymphocyte antigen 6 complex, locus G6E (Ly6g6e), m		6.6553	6.20895	6.20486	5.94586	6.12062	6.44911	6.18196	6.45968	6.76776	6.06049	6.32638	6.246	6.59752	6.40547	6.51629	6.14296	6.15645	6.05765	6.1303	6.0247	6.21855	6.74722	6.27952	6.29551	6.09505	6.11797	6.28504	6.0646	6.34468	6.77211	5.85349	6.18541	6.21476	6.05129	6.53348	5.93622	6.27981	6.26607	6.13108	6.33578	5.94804
chr17	35165119	35167186	17337021	---		---	AK054225 // GenBank HTC // Mus musculus 2 days pregnant adult female oviduct cDNA, RIKE		7.23402	6.92364	7.41144	7.28696	6.80193	7.09315	7.21718	7.10971	7.04526	7.20412	7.25385	7.46916	7.10924	7.20617	6.65347	7.7304	7.61206	6.4635	7.08878	7.00364	7.35834	7.36603	6.97757	7.40459	7.68627	7.19716	7.71647	6.9986	7.53792	7.26803	7.4896	7.52411	6.74996	7.24438	7.17585	7.75762	7.14709	7.32575	7.58877	7.00892	7.35973
chr17	31681480	31681728	17548025	NM_013501 // Cryaa // crystallin, alpha A // 17 A3-B|17 17.4 cM // 12954 /// ENSMUST000	Cryaa	NM_013501	NM_013501 // RefSeq // Mus musculus crystallin, alpha A (Cryaa), mRNA. // chr17 // 100		5.05892	5.09858	4.95848	5.17912	5.35213	5.12035	5.20198	5.51357	4.86343	5.44421	5.40738	4.97696	5.17155	5.19466	5.1593	5.10605	5.31419	5.24811	5.23662	5.25481	5.32561	5.04915	5.33162	4.7357	5.07497	5.28202	5.30839	5.10776	5.12308	5.06336	5.30301	5.13841	5.26254	5.11923	5.19698	4.83721	5.49387	5.26608	5.0773	5.33203	5.13292
chr17	34026033	34028060	17343735	NM_013543 // H2-Ke6 // H2-K region expressed gene 6 // 17 B1|17 18.48 cM // 14979 /// E	H2-Ke6	NM_013543	NM_013543 // RefSeq // Mus musculus H2-K region expressed gene 6 (H2-Ke6), mRNA. // chr		9.5372	9.24561	8.61722	8.85589	8.80227	8.8174	8.952	10.1167	9.84847	8.89861	9.03221	9.55465	8.56207	8.74644	8.93203	9.03554	8.93466	9.04587	8.75292	8.91103	9.89513	9.28624	9.13319	9.88744	9.11198	9.10435	8.97031	8.98182	8.88816	9.80755	9.13585	8.4642	9.04762	9.17452	9.23437	9.20646	8.95642	8.96265	8.91195	9.04812	8.4526
chr17	27189600	27204438	17342708	NM_146075 // Lemd2 // LEM domain containing 2 // 17 A3.3|17 // 224640 /// ENSMUST000000	Lemd2	NM_146075	NM_146075 // RefSeq // Mus musculus LEM domain containing 2 (Lemd2), mRNA. // chr17 //		9.23402	9.53224	9.3712	9.87739	9.2864	9.82001	9.22376	9.17732	8.92311	9.56321	9.49795	9.42747	9.63411	9.26037	9.34474	9.70225	9.79914	9.27806	9.4354	9.43288	9.0725	9.78772	9.31216	8.93237	9.22691	9.20466	9.1235	8.88542	9.32293	8.95173	9.51253	8.89758	9.76382	9.80118	9.24081	9.56429	9.45711	9.5818	9.1697	9.47137	9.42729
chr17	29614790	29641664	17335567	NM_021419 // Rnf8 // ring finger protein 8 // 17 A3.3|17 // 58230 /// ENSMUST0000002481	Rnf8	NM_021419	NM_021419 // RefSeq // Mus musculus ring finger protein 8 (Rnf8), mRNA. // chr17 // 100		7.85765	8.03272	8.34784	8.1637	7.90242	8.06232	8.0736	7.66075	7.76496	8.19269	8.14545	8.07236	8.42076	8.08565	8.07043	8.18666	8.61362	8.11667	8.13692	8.00087	7.92929	7.95578	7.65962	7.7194	8.14495	8.13888	8.3883	7.71112	7.88656	7.66516	8.34919	8.22137	8.36263	8.44444	8.20068	8.38719	8.27632	8.14004	8.08639	8.02574	8.35866
chr17	12378609	12419384	17333267	NM_008877 // Plg // plasminogen // 17 A1|17 7.3 cM // 18815 /// ENSMUST00000014578 // P	Plg	NM_008877	NM_008877 // RefSeq // Mus musculus plasminogen (Plg), mRNA. // chr17 // 100 // 100 //		5.00927	5.03451	4.8603	5.29075	5.21889	5.4039	5.06409	5.04866	4.84681	4.99952	5.07995	5.02489	4.92095	5.02494	5.16558	5.12629	5.01079	5.00612	5.28837	4.9772	5.06886	4.87171	5.19551	4.9116	4.90393	5.20678	5.23204	4.78695	4.7204	4.71374	5.18876	5.412	5.32748	4.71754	5.19661	4.94749	4.91624	5.15518	5.02834	5.35011	4.88873
chr17	33742484	33760530	17343617	ENSMUST00000057373 // Rab11b // RAB11B, member RAS oncogene family // 17 B1|17 18.3 cM	Rab11b	ENSMUST00000057373	ENSMUST00000057373 // ENSEMBL // cdna:known chromosome:NCBIM37:17:33882895:33897475:-1		10.962	11.1138	11.0198	10.9794	10.8678	11.0834	11.0557	10.887	10.774	10.9975	11.0719	11.2132	11.083	11.082	10.7116	11.2196	11.1909	10.7437	11.0287	10.9696	10.597	10.8346	10.9733	10.8767	10.9471	11.02	11.0231	10.8748	10.8821	10.642	11.1234	11.117	11.0058	11.2125	10.938	11.0296	11.0446	11.223	11.0497	11.0397	10.9045
chr17	35253951	35254039	17344329	---		---	ENSMUST00000104619 // ENSEMBL // ncrna:miRNA chromosome:NCBIM37:17:35390896:35390984:-1		10.7468	10.4299	10.8282	9.87183	10.3371	9.72873	10.3209	11.1818	11.0784	10.2676	9.53692	10.1595	9.62613	10.7932	9.41726	10.0583	10.711	9.91394	9.71957	9.21366	10.1146	9.9162	10.2905	10.4452	10.0032	10.5125	9.70137	10.9761	10.5791	10.8633	9.59624	10.8823	9.16467	10.5668	9.00556	9.75186	9.4971	10.3854	8.9802	10.2513	9.55324
chr17	23776916	23786081	17341619	NM_029798 // Flywch2 // FLYWCH family member 2 // 17 A3.3|17 // 76917 /// ENSMUST000000	Flywch2	NM_029798	NM_029798 // RefSeq // Mus musculus FLYWCH family member 2 (Flywch2), mRNA. // chr17 //		6.6023	6.56618	6.30114	5.72004	5.99612	6.16967	6.55077	5.27776	4.94475	6.47044	5.91982	6.657	5.73302	6.50912	5.71253	6.74513	7.22546	5.94782	6.21482	6.11757	5.73734	5.53476	6.10677	5.84036	6.46137	6.57028	6.5691	6.45115	6.13632	5.45941	6.53158	6.79814	6.13173	6.56768	6.26596	6.50008	6.54172	6.94411	5.92702	6.98014	6.3846
chr17	25946383	25952565	17342538	AK044505 // A930017K11Rik // RIKEN cDNA A930017K11 gene // 17 A3.3|17 // 100034748 ///	A930017K11Rik	AK044505	AK044505 // GenBank HTC // Mus musculus adult retina cDNA, RIKEN full-length enriched l		5.73488	5.74694	5.81511	6.00658	6.31731	5.86565	5.86795	6.68221	5.52559	5.68973	6.10823	6.22693	5.91786	5.81732	5.7608	5.56994	5.47981	5.88555	5.93796	5.94011	5.8126	5.93062	5.97846	5.44137	5.70681	6.20661	5.55874	5.78844	6.06071	5.52117	5.88258	5.98544	6.17148	6.03674	5.92759	5.79811	6.14385	5.5984	5.81388	5.94683	5.65102
chr17	35128997	35132050	17344242	ENSMUST00000025249 // Apom // apolipoprotein M // 17|17 B2 // 55938 /// NM_018816 // Ap	Apom	ENSMUST00000025249	ENSMUST00000025249 // ENSEMBL // cdna:known chromosome:NCBIM37:17:35265942:35268995:-1		4.86613	4.73884	4.81442	5.03199	4.77211	4.77156	4.87943	4.72724	4.26511	4.76129	4.9438	4.66842	5.25416	4.77605	4.80972	4.90315	4.94819	4.77466	4.98681	4.60429	4.62116	4.61554	4.94869	4.415	4.54585	4.72519	4.88929	4.43527	4.61769	4.50082	4.75313	4.55524	5.05346	4.71626	4.8904	4.65302	5.08655	4.88989	4.66655	5.08293	4.65701
chr17	35617923	35626637	17344343	NM_001244654 // Gm9573 // predicted gene 9573 // 17 B1|17 // 672682 /// ENSMUST00000164	Gm9573	NM_001244654	NM_001244654 // RefSeq // Mus musculus predicted gene 9573 (Gm9573), mRNA. // chr17 //		4.77573	5.45972	4.4798	4.45127	4.57696	4.67362	4.56208	4.94052	4.65255	4.61304	4.70324	4.50134	4.42617	5.55753	5.09544	5.19125	4.63724	4.64888	4.86262	4.45675	4.73456	4.69662	5.42835	4.7444	4.46121	4.54026	4.62554	4.60677	4.59117	4.83617	4.50323	4.76742	4.49108	4.42753	4.71617	4.33864	4.60086	4.52769	4.92797	4.66872	4.2927
chr17	25779843	25785673	17342359	ENSMUST00000077938 // Haghl // hydroxyacylglutathione hydrolase-like // 17 A3.3|17 // 6	Haghl	ENSMUST00000077938	ENSMUST00000077938 // ENSEMBL // cdna:known chromosome:NCBIM37:17:25919734:25922618:-1		7.60978	8.25726	8.17124	7.83467	7.54919	8.11989	8.07936	7.61868	7.94781	8.2991	8.21554	8.57152	7.76235	7.90056	8.34178	8.00613	8.33286	8.03466	8.15251	7.71515	7.20363	7.89511	7.6404	8.15513	8.08647	8.65687	7.85232	7.58803	7.55707	7.73687	7.88732	7.88939	8.05491	8.08434	8.6886	8.23917	7.72366	8.41534	8.24922	7.70436	8.2321
chr17	7882508	7946352	17340702	ENSMUST00000097423 // Rsph3a // radial spoke 3A homolog (Chlamydomonas) // 17 A1|17 //	Rsph3a	ENSMUST00000097423	ENSMUST00000097423 // ENSEMBL // cdna:known chromosome:NCBIM37:17:8138518:8172689:1 gen		6.02563	6.1623	6.47349	6.72008	6.3028	6.51861	6.00861	6.45549	6.02234	6.26682	6.88927	6.47315	6.65013	6.3148	6.34613	6.34075	6.28022	6.03551	6.34074	6.10662	6.42598	6.47048	6.13252	6.18977	6.29844	6.23702	6.30226	6.13862	6.48437	6.71055	6.55679	6.09481	6.11773	6.2226	6.42395	6.44746	6.63962	6.1203	6.14621	6.13481	6.4853
chr17	32506462	32528894	17335952	NM_001101445 // Cyp4f17 // cytochrome P450, family 4, subfamily f, polypeptide 17 // 17	Cyp4f17	NM_001101445	NM_001101445 // RefSeq // Mus musculus cytochrome P450, family 4, subfamily f, polypept		7.64422	6.23322	7.44007	6.56202	7.07675	7.12971	7.0199	8.54188	8.10132	6.76806	7.44816	6.93734	7.01432	7.03847	7.29223	7.40173	7.36853	7.51965	6.91218	7.04777	7.95056	6.74586	7.75274	7.92876	7.48476	7.05824	7.65084	7.77925	6.73237	8.41918	6.40605	7.82536	7.01835	6.90654	6.89165	5.90073	6.55616	7.22509	6.12887	6.9307	7.91076
chr17	34020823	34022402	17336318	XR_105835 // Gm19436 // predicted gene, 19436 // --- // 100502891	Gm19436	XR_105835	XR_105835 // RefSeq // PREDICTED: Mus musculus predicted gene, 19436 (Gm19436), miscRNA		6.54724	6.63073	6.64484	6.39981	6.58709	7.17818	6.54065	6.65759	6.21053	6.44201	7.23749	6.59593	7.18007	6.46857	6.22264	6.58409	6.90744	6.56777	6.68588	6.60176	6.39549	6.63138	6.5739	6.23849	6.65226	6.50052	6.82373	6.42809	6.43639	6.30557	6.74354	6.65539	6.97634	6.618	6.87369	6.55295	6.66771	6.75457	6.47302	6.59305	6.5882
chr17	8293366	8311052	17340730	AK015714 // 4930506C21Rik // RIKEN cDNA 4930506C21 gene // 17|17 // 75060 /// AK043779	4930506C21Rik	AK015714	AK015714 // GenBank HTC // Mus musculus adult male testis cDNA, RIKEN full-length enric		4.20047	4.49004	4.44416	4.37713	4.47803	4.44291	4.28645	4.30419	4.22891	4.34932	4.44899	4.37108	4.67986	4.21003	4.39133	4.55208	4.15312	4.4015	4.33896	4.59072	4.27346	4.49433	4.31146	4.11938	4.3492	4.22988	4.40474	4.18616	4.48709	4.23112	4.62414	4.31417	4.54309	4.41697	4.42212	4.43903	4.58178	4.24003	4.64814	4.38005	4.39207
chr17	15009840	15022945	17333505	NM_001039552 // 2210404J11Rik // RIKEN cDNA 2210404J11 gene // 17 A2|17 // 381062 /// E	2210404J11Rik	NM_001039552	NM_001039552 // RefSeq // Mus musculus RIKEN cDNA 2210404J11 gene (2210404J11Rik), tran		8.08665	8.4268	8.58376	8.27145	8.42619	8.19575	8.35892	8.43415	8.41389	8.42014	8.23537	8.3438	8.49871	8.35356	8.21313	8.53556	8.65642	8.28842	8.54528	8.4216	8.1591	8.21156	8.51363	8.41831	8.57736	8.50769	8.59051	8.81221	8.47525	8.64818	8.56619	8.47381	8.69896	8.50733	8.84095	8.6726	8.57859	8.4975	8.50787	8.63008	8.59968
chr17	24414675	24426307	17334241	NM_009070 // Rnps1 // ribonucleic acid binding protein S1 // 17 A3.3|17 // 19826 /// EN	Rnps1	NM_009070	NM_009070 // RefSeq // Mus musculus ribonucleic acid binding protein S1 (Rnps1), transc		9.95141	10.2687	10.3245	10.2539	9.78383	10.116	10.1512	8.63484	9.54528	10.0863	10.2027	10.1673	10.1534	10.1449	10.0131	10.1115	10.4737	10.0523	10.1882	10.1594	9.52883	10.1419	9.71317	9.7146	9.82895	10.2354	10.0033	9.66389	10.1416	9.23118	9.95406	10.1489	10.2628	10.3483	10.2716	10.1859	9.97443	10.2901	10.4543	10.1152	10.2832
chr17	15804662	15826586	17341231	NM_178615 // Rgmb // RGM domain family, member B // 17 A2|17 // 68799 /// ENSMUST000001	Rgmb	NM_178615	NM_178615 // RefSeq // Mus musculus RGM domain family, member B (Rgmb), mRNA. // chr17		8.66966	7.56284	8.16578	8.55543	8.54833	9.65481	8.8323	9.2697	8.86544	8.03019	8.95029	8.82938	9.19744	8.25163	9.0292	9.09803	10.0442	7.46952	8.30155	8.11326	8.84806	8.77552	8.00913	8.68303	7.99964	8.06942	8.57567	8.08202	8.15067	8.95677	8.74636	8.28421	8.74131	9.43448	8.9168	9.0942	8.59202	8.86464	7.82581	7.19952	9.63525
chr17	12682411	12683233	17547986	XR_141810 // LOC100862021 // uncharacterized LOC100862021 // --- // 100862021	LOC100862021	XR_141810	XR_141810 // RefSeq // PREDICTED: Mus musculus uncharacterized LOC100862021 (LOC1008620		4.55405	4.57602	4.59764	4.67265	4.38001	4.52289	4.5047	4.60256	4.79479	4.84494	4.73657	4.48732	4.87481	4.4375	4.52596	4.52614	4.58707	4.64025	4.54268	4.53453	4.76802	4.54467	4.35659	4.62636	4.55248	4.40315	4.59893	4.34545	4.48644	4.72734	4.62473	4.60702	4.73835	4.67553	4.47809	4.32405	4.61964	4.55339	4.63889	4.62045	4.38757
chr17	33909414	33915590	17336213	NM_007829 // Daxx // Fas death domain-associated protein // 17 B1|17 17.0 cM // 13163 /	Daxx	NM_007829	NM_007829 // RefSeq // Mus musculus Fas death domain-associated protein (Daxx), transcr		8.13406	8.44402	8.39415	8.64309	8.0453	8.68734	8.34223	8.07171	8.33014	8.37408	8.49426	8.68107	8.50213	8.2329	8.44472	8.40487	8.78054	8.16106	8.62682	8.48921	8.70415	8.44336	8.33196	8.55571	8.20526	8.3694	8.40396	8.14062	8.3389	8.14574	8.35524	8.18483	8.37387	8.50603	8.66291	8.65549	8.39866	8.54555	8.5293	8.48639	8.44852
chr17	14943184	14959570	17333482	NM_001083882 // 1600012H06Rik // RIKEN cDNA 1600012H06 gene // 17 A2|17 // 67912 /// NM	1600012H06Rik	NM_001083882	NM_001083882 // RefSeq // Mus musculus RIKEN cDNA 1600012H06 gene (1600012H06Rik), tran		7.21487	7.5681	7.243	7.32399	7.19268	7.21289	7.39684	7.76518	7.56806	7.47559	7.64172	7.30696	7.42247	7.08684	7.3461	7.58605	7.52054	7.26221	7.3259	7.3222	7.5436	7.42582	7.35607	7.69075	7.20314	7.42058	7.45886	7.29649	7.37474	7.90072	7.30818	7.22062	7.40451	7.42963	6.72874	7.37708	6.92993	7.32634	7.20838	7.41906	7.29835
chr17	17121383	17146878	17333651	NM_011765 // Zfp97 // zinc finger protein 97 // 17 A3.1|17 // 22759 /// ENSMUST00000147	Zfp97	NM_011765	NM_011765 // RefSeq // Mus musculus zinc finger protein 97 (Zfp97), mRNA. // chr17 // 1		3.49659	3.89916	4.6701	3.40748	3.60833	2.57278	3.33104	4.83625	4.85994	3.68911	3.69897	4.43428	3.74898	4.84781	3.14026	3.60872	5.92423	3.46985	3.22379	4.10835	5.34674	3.63743	3.49565	5.56192	3.55472	3.31422	4.71414	4.11942	3.6657	5.33155	4.45754	4.16935	4.38548	5.41325	3.3379	3.98929	4.9482	4.80746	5.37519	3.05974	4.84656
chr17	25919089	25935745	17334830	ENSMUST00000140304 // Pigq // phosphatidylinositol glycan anchor biosynthesis, class Q	Pigq	ENSMUST00000140304	ENSMUST00000140304 // ENSEMBL // cdna:known chromosome:NCBIM37:17:26070941:26078880:-1		5.81895	6.01814	5.96216	6.07076	6.33075	6.21165	5.67386	6.15505	5.85139	6.16383	6.49223	5.97265	5.95775	5.55457	6.17837	5.42418	6.23076	5.80739	6.46282	5.90734	5.94186	6.06294	6.19396	5.83337	5.5937	5.6943	6.12745	5.75117	5.63602	5.73546	5.67452	5.61257	6.37349	6.01299	5.95227	6.16892	5.98296	5.95179	5.86948	6.08646	5.95209
chr17	34644764	34646327	17336655	ENSMUST00000036720 // Fkbpl // FK506 binding protein-like // 17 B1|17 // 56299 /// NM_0	Fkbpl	ENSMUST00000036720	ENSMUST00000036720 // ENSEMBL // cdna:known chromosome:NCBIM37:17:34781709:34783269:1 g		6.80699	6.76084	6.86214	6.92774	6.91832	6.71087	6.87062	7.31537	7.07494	6.83634	6.86813	7.11926	6.662	6.90155	7.08635	6.94151	7.07772	6.94562	7.05777	7.02469	7.10279	6.78279	6.91872	7.52755	6.88619	7.15464	7.0873	6.81463	6.68523	7.27452	7.24062	6.44612	6.62029	6.99548	6.82019	7.17021	6.88988	7.08613	7.10297	7.0084	6.61082
chr17	24208861	24221730	17334200	BC028777 // BC028777 // cDNA sequence BC028777 // --- // 100036538	BC028777	BC028777	BC028777 // GenBank // Mus musculus, clone IMAGE:1067795, mRNA. // chr17 // 76 // 74 //		5.56361	5.68525	5.73742	6.3084	5.64542	5.87911	5.81417	5.72098	5.68561	6.01156	6.09208	5.91065	5.88123	5.45602	5.73915	5.45203	6.00689	5.63034	5.68874	5.56779	5.62549	5.70168	5.61756	5.33951	5.48621	5.5983	5.6259	5.52599	5.65155	5.59241	5.68962	6.20412	5.92063	5.47284	5.86096	5.82873	5.89214	5.87662	5.90046	5.7771	5.64766
chr17	5410864	5440260	17340485	NM_027457 // Tmem242 // transmembrane protein 242 // 17 A1|17 // 70544 /// ENSMUST00000	Tmem242	NM_027457	NM_027457 // RefSeq // Mus musculus transmembrane protein 242 (Tmem242), mRNA. // chr17		8.45276	8.53512	8.17155	8.78331	8.00437	8.01275	8.15308	8.47891	7.7615	8.25449	8.25507	8.65116	8.01147	8.37195	7.77637	8.7329	9.17259	7.64658	8.34726	8.22308	8.07812	7.90326	8.37969	8.29348	8.69223	8.7294	8.64054	8.61699	8.56501	8.28738	8.60355	8.45572	8.54214	8.41812	8.28169	8.60556	8.27326	8.87982	8.13716	8.57558	8.35899
chr17	8282904	8297661	17333079	ENSMUST00000155364 // Brp44l // brain protein 44-like // 17 A1|17 7.8 cM // 55951 /// N	Brp44l	ENSMUST00000155364	ENSMUST00000155364 // ENSEMBL // cdna:known chromosome:NCBIM37:17:8476627:8490526:1 gen		7.07601	7.1902	7.00746	7.39089	6.91367	7.29493	7.05213	7.33798	7.09835	7.33162	7.56986	7.26659	7.10637	6.8155	6.81783	7.42634	7.46095	6.82558	7.13159	7.27948	7.12157	7.32148	7.04701	7.33901	7.27343	7.16514	7.1131	7.2977	7.14865	7.24836	7.23747	7.20917	7.13305	7.09422	7.06802	7.29874	6.97785	7.1797	7.22016	6.92874	7.29113
chr17	33959663	33959767	17336314	---		---	ENSMUST00000122652 // ENSEMBL // ncrna:snRNA chromosome:NCBIM37:17:34096608:34096712:1		5.96548	6.88176	6.33817	5.47976	6.2989	5.33371	5.69818	5.62084	5.9744	6.21741	5.84714	6.19431	5.87689	6.03075	6.53517	5.73138	6.44752	6.96108	6.02913	5.98984	6.39409	6.25432	5.64768	6.43401	5.70976	6.0036	5.64224	6.07773	6.32777	5.61975	5.81979	6.71358	6.59652	6.00594	5.74217	6.42593	6.05302	6.2591	6.57396	6.32118	6.46709
chr17	35235088	35238767	17337036	NM_023179 // Atp6v1g2 // ATPase, H+ transporting, lysosomal V1 subunit G2 // 17|17 B2 /	Atp6v1g2	NM_023179	NM_023179 // RefSeq // Mus musculus ATPase, H+ transporting, lysosomal V1 subunit G2 (A		7.91515	8.05724	8.66535	8.13682	7.7312	8.06208	8.20615	8.56249	7.9795	7.90652	8.04725	9.00871	7.91647	8.59648	8.42299	8.3594	8.91754	8.15625	8.03869	7.89441	8.29268	8.38558	7.89172	7.90276	8.35924	8.41625	7.52806	8.27666	8.24377	7.95036	8.43992	8.83439	7.61233	8.79366	7.98997	8.34984	8.15629	8.20448	7.79834	7.80986	8.54572
chr17	26202951	26211324	17334883	NM_001081069 // Rgs11 // regulator of G-protein signaling 11 // 17 A3.3|17 // 50782 ///	Rgs11	NM_001081069	NM_001081069 // RefSeq // Mus musculus regulator of G-protein signaling 11 (Rgs11), mRN		6.99292	6.36216	7.27146	6.47511	6.74143	6.48163	6.40561	7.06992	7.21565	6.61885	6.20853	6.94614	6.1493	6.40511	6.50038	6.73892	7.62911	7.5191	7.03318	7.38031	6.84216	6.40642	6.67515	6.6754	6.84292	7.03398	6.63931	6.68449	6.18674	7.29875	7.04594	6.541	6.71985	6.6731	6.44694	6.54995	6.87848	6.34948	7.57855	7.18437	6.2783
chr17	35126386	35128855	17336980	NM_033477 // D17H6S53E // DNA segment, Chr 17, human D6S53E // 17 B1|17 19.02 cM // 114	D17H6S53E	NM_033477	NM_033477 // RefSeq // Mus musculus DNA segment, Chr 17, human D6S53E (D17H6S53E), mRNA		6.98227	7.03877	7.03816	7.04312	6.9111	7.01949	6.93479	7.36906	7.6028	6.63656	7.07142	6.86538	6.94235	6.74351	6.91783	6.66359	7.28562	6.76158	7.14389	7.11414	7.43376	6.92007	6.71152	7.43716	6.59505	6.87192	6.97909	6.79686	6.61126	6.76999	6.70234	6.79698	7.04046	7.0721	7.02931	6.91059	6.66195	6.92653	6.81972	6.96768	6.88014
chr17	21733724	21748969	17333977	NM_001164676 // Zfp229 // zinc finger protein 229 // 17 A3.3|17 // 381067 /// ENSMUST00	Zfp229	NM_001164676	NM_001164676 // RefSeq // Mus musculus zinc finger protein 229 (Zfp229), mRNA. // chr17		6.31111	6.67545	6.88995	6.12628	6.33359	6.5825	6.60555	6.16794	6.14891	6.46342	6.48852	6.82821	6.12615	6.77724	6.11923	6.74296	7.27748	5.93608	5.93754	6.56412	6.14984	6.61401	6.23309	6.57013	6.5792	6.50097	6.97787	6.31723	6.95539	6.35399	6.69049	6.50007	6.69149	7.35408	6.55285	6.9313	7.05385	7.01336	6.77287	6.62168	7.19364
chr17	33940660	33949695	17336268	ENSMUST00000025170 // Wdr46 // WD repeat domain 46 // 17 B1|17 // 57315 /// NM_020603 /	Wdr46	ENSMUST00000025170	ENSMUST00000025170 // ENSEMBL // cdna:known chromosome:NCBIM37:17:34077605:34086640:1 g		8.7784	8.26081	8.75989	8.48153	8.55848	7.69616	8.17126	8.86706	8.71779	8.34776	7.59325	8.59676	7.93403	8.28736	8.33872	8.73975	9.08799	8.06234	7.89801	8.22143	8.62153	7.79474	8.60063	8.49206	8.28997	8.30628	7.93979	8.27051	8.31446	8.72686	8.09831	7.96236	7.79149	8.47597	7.9082	8.34941	7.65777	8.15113	8.09953	9.32296	7.90698
chr17	6079786	6086517	17332851	ENSMUST00000039487 // Gtf2h5 // general transcription factor IIH, polypeptide 5 // 17 A	Gtf2h5	ENSMUST00000039487	ENSMUST00000039487 // ENSEMBL // cdna:known chromosome:NCBIM37:17:6079786:6086517:1 gen		9.93134	10.1651	10.0232	10.2636	9.69911	9.84827	10.0893	9.51188	9.61611	10.123	9.91614	10.0831	9.74953	9.9889	10.2206	10.0864	10.3737	9.91256	10.0653	9.9379	9.47616	10.0195	9.88008	9.8768	9.96912	10.0237	10.0462	9.9021	10.1761	9.51572	10.1186	10.2648	10.1289	10.1639	9.93368	10.0139	10.1049	10.1234	10.1182	10.1852	9.94003
chr17	32284787	32298689	17335926	---		---	AK159351 // GenBank HTC // Mus musculus osteoclast-like cell cDNA, RIKEN full-length en		7.39352	6.87469	7.13788	7.26872	6.87665	6.67682	7.32723	7.53894	6.60604	6.66304	6.29567	7.97265	6.60411	7.61199	6.33245	8.10354	8.03277	6.1556	6.96944	7.53237	7.32523	6.80707	7.38003	7.20662	8.3228	7.41894	8.02409	8.27241	7.08226	7.24349	7.84189	7.88408	6.52517	7.84947	6.22355	7.73885	7.66299	7.58373	7.12575	6.53138	7.86369
chr17	15499888	15528379	17333567	ENSMUST00000117593 // Tbp // TATA box binding protein // 17 A2|17 8.25 cM // 21374 ///	Tbp	ENSMUST00000117593	ENSMUST00000117593 // ENSEMBL // cdna:known chromosome:NCBIM37:17:15636924:15654391:1 g		8.93568	9.31256	9.6095	9.1631	9.27327	9.05549	9.3756	8.37658	8.84132	9.25132	9.15907	9.36458	9.07619	9.53198	9.02221	9.34933	9.87733	9.29658	9.43196	9.17695	8.87871	9.17269	9.01762	9.01258	9.35787	9.45942	9.45174	9.16554	9.34138	8.77216	9.29274	9.38772	9.39073	9.64627	9.54791	9.38898	9.37715	9.47826	9.47984	9.39523	9.52924
chr17	33955780	33966984	17336286	NM_172620 // Vps52 // vacuolar protein sorting 52 (yeast) // 17 B1|17 // 224705 /// BC0	Vps52	NM_172620	NM_172620 // RefSeq // Mus musculus vacuolar protein sorting 52 (yeast) (Vps52), mRNA.		9.17264	8.80128	8.95923	9.04969	9.03301	9.16155	9.20191	9.38952	9.0745	9.04237	9.2884	9.41724	8.93333	9.05871	9.06659	9.30426	9.2948	8.86783	9.15052	9.00944	9.35185	9.05447	8.96063	9.30642	9.35617	9.32978	8.88409	9.04011	8.77454	9.12743	9.08693	9.11118	9.172	9.23543	8.67432	9.14171	9.3167	9.26498	9.07673	8.85229	9.23218
chr17	25727751	25731456	17334722	NM_028009 // Rpusd1 // RNA pseudouridylate synthase domain containing 1 // 17 A3.3|17 /	Rpusd1	NM_028009	NM_028009 // RefSeq // Mus musculus RNA pseudouridylate synthase domain containing 1 (R		7.66534	8.1457	8.04952	7.98405	7.71107	7.78456	8.07595	7.43335	7.58528	8.13988	7.84931	8.32522	7.7359	7.86936	7.68003	8.43817	8.42185	7.73725	7.83649	8.01038	7.4348	7.75559	7.67592	7.98243	8.06797	8.1164	7.86595	7.82401	7.78459	7.17776	7.96334	7.75368	7.56004	7.95682	7.68007	7.83492	7.81677	8.28475	7.88717	7.81436	8.17083
chr17	29268788	29302887	17335493	NM_030561 // BC004004 // cDNA sequence BC004004 // 17|17 B1 // 80748 /// ENSMUST0000006	BC004004	NM_030561	NM_030561 // RefSeq // Mus musculus cDNA sequence BC004004 (BC004004), mRNA. // chr17 /		7.50487	7.53894	7.37954	7.69691	7.28682	7.25596	7.49875	7.61447	7.82588	7.56558	7.30153	7.55491	7.0793	7.33814	7.24616	7.4906	7.86397	7.121	7.36447	7.11955	7.64013	7.34322	7.18448	7.79819	7.3212	7.71623	7.21083	7.30999	7.43963	7.66415	7.16777	7.25529	7.51994	7.62212	7.19965	7.31785	7.09667	7.64743	7.33494	7.43895	7.20906
chr17	12888902	12910000	17340917	NM_001034866 // Pnldc1 // poly(A)-specific ribonuclease (PARN)-like domain containing 1	Pnldc1	NM_001034866	NM_001034866 // RefSeq // Mus musculus poly(A)-specific ribonuclease (PARN)-like domain		5.82452	5.48144	5.82842	5.53627	5.48059	5.49593	5.78939	5.33475	5.45993	5.81045	5.54083	5.8291	5.5855	5.77373	5.47015	5.24894	6.14742	5.88506	5.52381	5.62839	5.59	5.73535	4.97239	5.1906	5.56936	5.8173	5.79926	5.82173	5.73864	5.42868	5.6172	5.64947	5.78665	5.82768	5.33092	6.04908	6.03414	5.56687	5.65709	5.6628	5.79135
chr17	34850391	34856372	17336738	NM_001045864 // Rdbp // RD RNA-binding protein // 17 B1|17 18.84 cM // 27632 /// ENSMUS	Rdbp	NM_001045864	NM_001045864 // RefSeq // Mus musculus RD RNA-binding protein (Rdbp), transcript varian		8.3853	8.01452	8.2017	8.28156	8.24506	8.21654	7.98556	8.11546	8.61087	8.07275	8.06798	8.46125	8.12217	8.03355	8.3967	8.3616	8.5629	8.06336	8.1006	8.18846	8.52169	8.21423	7.80782	8.79485	8.01973	8.3249	8.23272	8.01888	8.16106	8.13903	7.95873	7.86899	8.13719	8.31299	7.99767	8.12982	7.85117	8.24032	8.14662	8.30705	8.16558
chr17	34028266	34031690	17343744	NM_008202 // Slc39a7 // solute carrier family 39 (zinc transporter), member 7 // 17 B1|	Slc39a7	NM_008202	NM_008202 // RefSeq // Mus musculus solute carrier family 39 (zinc transporter), member		8.94964	8.96406	9.00455	9.32427	8.85548	9.07737	8.80753	9.96471	9.37434	8.75895	8.94398	8.76134	9.30773	8.7601	8.72256	9.07901	8.99142	8.92511	9.12807	9.21762	9.36651	9.1608	8.98388	9.14195	8.41073	8.77926	8.91358	8.57506	8.88857	9.27124	8.83161	8.57632	9.32141	9.05835	8.95115	8.93277	8.29233	8.87554	8.98806	9.19218	8.84922
chr17	7374193	7374357	17340669	---		---	ENSMUST00000158775 // ENSEMBL // ncrna:snRNA chromosome:NCBIM37:17:7578542:7578706:-1 g		4.96479	5.2142	4.78135	4.99671	5.02179	5.30319	5.2466	5.05716	5.09795	4.89287	5.09659	5.01105	5.07638	5.19412	5.30817	5.21374	4.97532	5.11925	4.89201	5.16889	4.9061	4.88867	5.28452	5.09753	4.95969	5.04341	5.04503	5.00263	4.8042	4.78599	4.98264	5.16574	4.89993	5.20891	5.22642	4.87729	5.16596	4.54957	4.91864	5.38133	5.11588
chr17	35897595	35910075	17344472	NM_001142744 // Atat1 // alpha tubulin acetyltransferase 1 // 17|17 B3 // 73242 /// ENS	Atat1	NM_001142744	NM_001142744 // RefSeq // Mus musculus alpha tubulin acetyltransferase 1 (Atat1), trans		8.75687	8.51332	8.94035	8.86769	8.73635	8.31184	8.53518	8.04185	8.37199	8.18067	8.22308	9.00691	8.27108	8.94144	8.64831	8.86177	9.21597	8.81748	8.5446	8.63635	8.44628	8.87817	8.22306	8.19675	8.89676	9.02857	8.78093	8.5955	8.67182	8.34852	8.63923	8.38391	8.70817	9.19118	8.70453	8.80094	8.81683	8.91266	8.61941	8.811	9.07144
chr17	21129351	21130877	17333889	ENSMUST00000170486 // Gm7732 // predicted gene 7732 // 17 A3.2|17 // 665654 /// ENSMUST	Gm7732	ENSMUST00000170486	ENSMUST00000170486 // ENSEMBL // cdna:known chromosome:NCBIM37:17:21266315:21267841:1 g		3.88432	3.68871	3.78094	3.83119	3.54105	3.72162	3.68053	3.68955	3.84782	3.3196	3.66526	3.67404	3.66959	3.57125	3.47294	4.30255	3.92218	3.86881	3.37847	3.84178	3.7492	3.4602	3.68626	3.86022	3.59172	3.6157	3.68396	3.7826	3.62696	4.03141	3.77117	3.86355	3.35008	3.79369	3.73714	3.83769	3.95261	3.95106	4.00789	3.91939	3.80313
chr17	33360507	33394641	17343568	NM_009542 // Zfp101 // zinc finger protein 101 // 17 B1|17 // 22643 /// ENSMUST00000167	Zfp101	NM_009542	NM_009542 // RefSeq // Mus musculus zinc finger protein 101 (Zfp101), mRNA. // chr17 //		7.18687	7.81679	7.83678	7.58656	7.75498	7.23763	7.95763	6.97837	7.44541	7.85956	7.3506	7.6021	7.78914	7.88198	7.0689	7.90154	8.17998	7.7167	7.83106	7.90422	7.27396	7.55457	7.67338	7.51579	8.04832	8.08259	8.02717	7.71548	7.60388	7.38483	8.00199	7.88594	8.109	8.01325	7.382	7.90623	8.04118	7.86429	8.00602	8.31001	7.72985
chr17	3557824	3559863	17332730	NR_045302 // 1700102H20Rik // RIKEN cDNA 1700102H20 gene // 17 A1|17 // 68230 /// NR_04	1700102H20Rik	NR_045302	NR_045302 // RefSeq // Mus musculus RIKEN cDNA 1700102H20 gene (1700102H20Rik), transcr		7.59083	7.69378	7.56667	7.37085	6.83848	5.86018	7.82026	7.2286	7.80475	7.83188	6.04252	7.70614	5.86885	7.82582	6.32515	7.50241	8.52258	7.4929	6.44337	6.52671	6.87115	6.62128	6.78203	8.23845	8.12863	8.18327	7.4126	7.79854	7.49455	7.77711	7.06042	8.08095	6.76216	7.43566	7.83278	7.41256	7.28856	7.64632	8.1165	8.22827	7.64075
chr17	28855136	28859503	17342940	NM_001034885 // Pnpla1 // patatin-like phospholipase domain containing 1 // 17 A3.3|17	Pnpla1	NM_001034885	NM_001034885 // RefSeq // Mus musculus patatin-like phospholipase domain containing 1 (		4.97225	4.86252	4.9544	4.47266	5.18229	5.30751	5.04554	4.81209	4.77862	4.98782	5.51418	4.90629	5.0383	4.98356	5.03811	4.62412	5.14276	4.96631	4.93758	4.97995	5.09767	4.98657	5.09881	4.78455	4.7611	5.09854	5.10943	4.89059	4.7806	4.82724	4.80122	5.107	5.20313	4.80697	4.90327	5.26175	5.04564	5.12781	5.11766	4.91954	4.70869
chr17	14665500	14694262	17341080	NM_011581 // Thbs2 // thrombospondin 2 // 17 A3-B|17 8.1 cM // 21826 /// ENSMUST0000017	Thbs2	NM_011581	NM_011581 // RefSeq // Mus musculus thrombospondin 2 (Thbs2), mRNA. // chr17 // 100 //		6.71424	7.21769	5.81676	6.31096	6.74013	6.79567	6.34128	6.96114	8.63718	8.30473	5.71195	8.29662	6	6.7696	6.44715	6.40582	5.78414	7.677	8.16625	7.91766	7.71961	5.85819	7.73286	8.85956	6.07002	6.26068	5.66602	7.23454	6.63995	6.76541	9.0762	6.63918	6.35821	8.13147	6.67123	5.76865	6.27133	5.61337	6.11929	5.96421	5.6941
chr17	35896946	35912641	17337308	---		---	ENSMUST00000149452 // ENSEMBL // cdna:known chromosome:NCBIM37:17:36033891:36049160:1 g		6.4535	6.0808	6.2884	6.00801	6.22152	6.06735	6.40059	6.57489	6.41853	6.08571	6.43766	6.10908	6.01405	6.24504	6.08956	6.03709	6.38156	6.07816	5.98127	5.98158	6.57001	6.14364	6.13397	6.19365	5.93644	6.01931	6.21066	6.13298	6.28323	6.37406	6.27829	5.88879	6.36012	6.3035	5.82603	6.4125	5.93407	6.30419	6.36287	5.85229	5.83928
chr17	13521456	13528434	17333410	NR_030763 // Smok4a // sperm motility kinase 4A // 17 A1|17 // 272667	Smok4a	NR_030763	NR_030763 // RefSeq // Mus musculus sperm motility kinase 4A (Smok4a), non-coding RNA.		5.16338	6.68334	6.22273	5.4712	5.65315	6.8283	6.14677	5.15339	5.42174	5.5646	7.69308	6.04859	7.27536	5.99071	5.25592	6.14565	6.51922	5.23721	6.90566	5.90851	6.57709	7.20189	5.69007	5.97436	5.19505	5.99904	6.26198	5.73463	6.26801	5.96748	6.39074	6.36308	7.15108	5.88891	5.94342	6.64614	5.83823	5.63766	6.32632	5.65208	5.57413
chr17	9422060	9422458	17333184	---		---	ENSMUST00000076982 // ENSEMBL // cdna:known chromosome:NCBIM37:17:9614925:9615323:1 gen		4.14064	3.94163	4.35737	3.78769	3.88778	4.1521	3.95343	4.12507	4.04699	3.43685	4.31817	4.2169	4.2968	4.06117	4.29169	4.01134	4.35458	3.909	4.21364	4.4972	4.25873	4.68813	3.87222	4.24584	4.41069	3.90415	4.4859	4.04446	4.28396	3.90711	4.63446	4.23591	4.17396	4.049	3.79892	4.32038	4.25471	4.37707	4.12859	3.63505	4.62746
chr17	35065388	35070050	17336921	NM_023463 // Ly6g6c // lymphocyte antigen 6 complex, locus G6C // 17 B1|17 // 68468 ///	Ly6g6c	NM_023463	NM_023463 // RefSeq // Mus musculus lymphocyte antigen 6 complex, locus G6C (Ly6g6c), m		6.15007	6.46307	6.10665	6.07597	6.02406	6.18636	6.02958	6.31762	6.07004	6.05297	6.38269	6.04227	6.21557	5.8875	6.08829	6.30651	5.90394	6.24698	6.20196	6.69883	6.10172	5.99196	6.74236	5.84863	6.1326	6.67915	5.9795	6.24611	6.22535	6.48427	5.9265	6.19884	5.83048	5.9165	6.07853	5.62574	5.95012	5.85704	6.15706	6.63764	5.97043
chr17	29890084	29897067	17335609	---		---	BC066032 // GenBank // Mus musculus cDNA clone IMAGE:6835408, partial cds. // chr17 //		4.85366	5.00767	5.51167	5.07799	5.04576	4.83388	5.14773	4.84029	4.60805	4.92015	4.80888	4.58611	4.83216	5.03614	4.76064	4.74343	5.13188	5.16075	5.14135	4.84183	4.75981	4.58462	4.96024	4.47636	4.7046	4.93422	5.26725	4.92581	4.85936	4.60358	5.13333	4.84407	5.38484	4.91834	5.71693	4.97711	4.93679	5.05564	4.83524	5.33556	4.91256
chr17	28989977	28990148	17342991	---		---	AK153676 // GenBank HTC // Mus musculus 3 days neonate thymus cDNA, RIKEN full-length e		5.36454	6.11201	6.50829	5.82676	6.03195	5.54871	5.66486	5.1737	5.82793	5.71756	5.90358	5.70071	5.27225	5.83465	4.63916	5.51196	6.25275	5.7124	6.16608	5.6011	5.90847	6.06056	5.36746	5.71877	5.86279	5.71816	6.29563	5.87854	5.91367	5.57552	6.35882	6.6543	6.29589	6.46785	5.35061	6.81555	6.2915	5.98989	5.98208	5.83995	5.824
chr17	25828867	25831843	17334803	ENSMUST00000133595 // Jmjd8 // jumonji domain containing 8 // 17|17 B1 // 72106 /// NM_	Jmjd8	ENSMUST00000133595	ENSMUST00000133595 // ENSEMBL // cdna:novel chromosome:NCBIM37:17:25965812:25968785:1 g		10.3656	10.0597	9.96239	10.1712	9.84232	10.0042	10.1208	10.7924	10.5397	9.93178	9.66131	9.94931	9.68735	9.79901	9.98051	10.2688	10.2094	9.90886	9.8962	9.89462	10.3782	10.0444	10.1535	10.5523	10.2569	10.2205	9.60615	9.88158	10.1415	10.6703	9.97203	9.48943	9.62305	10.3138	9.97592	10.0425	9.89712	9.98326	9.58565	9.77975	9.95611
chr17	25260511	25274622	17342219	NM_001177609 // Ube2i // ubiquitin-conjugating enzyme E2I // 17 A3.3|17 // 22196 /// NM	Ube2i	NM_001177609	NM_001177609 // RefSeq // Mus musculus ubiquitin-conjugating enzyme E2I (Ube2i), transc		9.59553	9.48241	9.54149	9.88483	9.28418	9.47246	9.57251	8.99482	9.19784	9.57369	9.46078	9.59171	9.57696	9.6316	9.53892	9.72843	9.85835	9.36906	9.52188	9.398	9.00724	9.49263	9.16407	9.2302	9.44088	9.46385	9.65798	9.36075	9.39822	8.86388	9.47761	9.37845	9.65142	9.7623	9.36221	9.51629	9.4027	9.7561	9.671	9.51325	9.34404
chr17	35241746	35253707	17337046	ENSMUST00000173731 // Ddx39b // DEAD (Asp-Glu-Ala-Asp) box polypeptide 39B // 17 B1|17	Ddx39b	ENSMUST00000173731	ENSMUST00000173731 // ENSEMBL // cdna:known chromosome:NCBIM37:17:35378815:35390625:1 g		10.5199	10.4694	10.4586	10.7609	10.4837	10.5186	10.3702	9.92793	9.98478	10.7589	10.3809	10.5506	10.6761	10.4866	10.7058	10.6124	10.7577	10.7773	10.6736	10.4826	9.9788	10.4558	10.5615	10.1728	10.4317	10.5228	10.482	10.3904	10.3861	10.0823	10.5406	10.2585	10.6493	10.4356	10.476	10.631	10.6383	10.6312	10.4929	10.4698	10.4672
chr17	14389107	14398942	17341076	NR_027986 // 4930474M22Rik // RIKEN cDNA 4930474M22 gene // 17 A2|17 // 74917 /// BC089	4930474M22Rik	NR_027986	NR_027986 // RefSeq // Mus musculus RIKEN cDNA 4930474M22 gene (4930474M22Rik), non-cod		5.35822	5.37199	5.01965	5.07448	5.36246	5.32305	5.4318	5.54278	5.51692	5.35263	5.00171	5.23274	5.49641	5.26765	5.26579	5.10346	5.16286	5.36359	5.28572	5.04072	5.23617	5.06746	5.15974	5.10506	5.10157	5.19684	5.18895	5.07884	5.52623	5.03481	5.31624	5.35583	5.25875	5.20459	5.5801	5.04018	5.18296	5.22649	5.08159	5.37824	5.01007
chr17	35335909	35337070	17337098	---		---	---		7.09055	7.82247	7.9221	6.64165	7.79262	7.71045	8.01682	7.58916	7.76977	7.91515	7.65221	7.78283	7.85674	7.96119	7.24771	6.77236	8.19966	7.12428	7.70797	7.77684	7.65176	7.99201	7.71344	7.44742	7.9322	7.94642	8.34814	7.97935	8.23358	7.11176	7.83666	7.92637	8.11182	7.85941	7.72157	8.09463	7.88227	8.02981	8.27444	7.95759	7.83873
chr17	13399042	13399206	17341024	---		---	ENSMUST00000158099 // ENSEMBL // ncrna:snRNA chromosome:NCBIM37:17:13591908:13592072:-1		3.3832	3.69256	3.61235	3.71172	3.66879	3.59228	3.96298	3.68893	3.65189	3.79216	3.74119	3.63516	3.57142	3.59197	3.58732	4.12319	3.87088	3.61715	3.44655	3.81673	3.46567	3.55414	3.60248	3.73599	3.66591	3.34247	3.46512	3.43205	3.58403	3.56653	3.69114	3.25229	3.84	3.42981	3.33093	3.54659	3.85199	3.72072	3.53212	3.57341	3.5281
chr17	24888486	24895087	17342051	NM_001163102 // Eme2 // essential meiotic endonuclease 1 homolog 2 (S. pombe) // 17 A3.	Eme2	NM_001163102	NM_001163102 // RefSeq // Mus musculus essential meiotic endonuclease 1 homolog 2 (S. p		7.87391	7.42887	7.4413	8.09269	7.77068	7.68298	7.41652	8.06495	8.20038	7.41745	7.68433	7.76621	7.64733	7.44655	7.58236	7.88808	7.96206	7.30713	7.48365	7.50359	7.83696	7.48628	7.558	8.19155	7.59254	7.8844	7.68005	7.36732	7.2662	8.1049	7.52394	7.26777	7.4408	7.5492	7.18836	7.53953	7.43665	7.77849	7.4353	7.30273	7.69213
chr17	17910617	17913148	17341280	XR_105841 // Gm19747 // predicted gene, 19747 // --- // 100503522	Gm19747	XR_105841	XR_105841 // RefSeq // PREDICTED: Mus musculus predicted gene, 19747 (Gm19747), miscRNA		4.53953	4.33457	4.40796	4.6785	4.55948	4.62011	4.58021	4.44613	4.34023	4.91925	5.1426	4.59403	4.76614	4.55722	4.36991	4.30872	4.7249	4.57122	4.42502	4.43763	4.47173	4.82717	4.32576	4.50389	4.30278	4.43663	4.6164	4.34351	4.75537	4.32423	4.44164	4.49942	4.6395	4.314	4.30755	4.44039	4.58272	4.68274	4.52442	4.36962	4.46421
chr17	34197721	34201454	17336446	ENSMUST00000025196 // Psmb8 // proteasome (prosome, macropain) subunit, beta type 8 (la	Psmb8	ENSMUST00000025196	ENSMUST00000025196 // ENSEMBL // cdna:known chromosome:NCBIM37:17:34334735:34338399:1 g		7.06457	6.9712	7.16	7.06127	6.993	7.50883	6.43627	7.24153	8.1386	7.06473	7.86029	7.7589	7.20874	7.15567	8.14913	6.87519	7.35718	6.77772	6.96024	8.2225	8.15287	7.80104	6.72237	9.20492	6.236	6.43861	6.46478	7.55896	7.01203	7.71721	6.50867	8.14056	6.42029	7.18243	6.6519	7.13972	6.27814	6.22679	6.57594	6.60923	6.05067
chr17	27901122	27909242	17342793	ENSMUST00000114848 // Taf11 // TAF11 RNA polymerase II, TATA box binding protein (TBP)-	Taf11	ENSMUST00000114848	ENSMUST00000114848 // ENSEMBL // cdna:known chromosome:NCBIM37:17:28038067:28046187:-1		7.67195	7.75524	7.97688	7.91679	7.52331	7.57747	7.94264	7.44441	7.65956	8.11704	7.73613	7.7944	7.62615	7.77034	7.39654	7.97528	8.20419	7.51366	7.78768	7.91904	7.57258	7.73645	7.56997	7.7748	8.0238	8.06399	7.96436	7.64953	8.01137	7.32935	7.94386	7.50084	7.94906	7.95876	7.40053	7.9402	7.93869	7.94204	8.00231	8.15123	7.72152
chr17	6895229	6895337	17340629	NR_030465 // Mir692-1 // microRNA 692-1 // 17|17 // 751529	Mir692-1	NR_030465	NR_030465 // RefSeq // Mus musculus microRNA 692-1 (Mir692-1), microRNA. // chr17 // 10		10.6304	10.3722	10.2521	10.0066	11.0658	10.3722	10.0566	10.46	10.1026	9.97114	10.37	10.3824	10.3047	9.91721	10.3202	10.0471	10.3073	9.88019	10.5287	10.4762	10.1716	10.3262	10.1342	9.66979	9.98191	10.1867	10.1952	10.1449	10.0692	9.38545	9.99342	9.64776	10.563	10.1619	9.72602	10.0413	9.68813	10.4301	10.2104	9.98526	9.9705
chr17	26861443	26897886	17334979	---		---	ENSMUST00000172664 // ENSEMBL // cdna:known chromosome:NCBIM37:17:26998388:27034831:1 g		6.08769	6.32802	6.38384	6.76938	6.5961	6.57055	6.34774	6.41695	6.03149	6.70528	6.39897	6.22858	6.18202	6.20281	6.30603	6.29714	6.36287	6.40262	6.03033	6.05004	6.22636	5.98424	6.30154	6.04955	6.40715	6.3734	6.51903	6.30268	6.46228	6.32694	6.40333	6.538	6.41241	6.20901	6.49249	6.20916	6.35895	6.24707	6.36546	6.41255	6.11909
chr17	13108617	13131791	17341003	NM_199252 // Unc93a // unc-93 homolog A (C. elegans) // 17 A1|17 7.8 cM // 381058 /// E	Unc93a	NM_199252	NM_199252 // RefSeq // Mus musculus unc-93 homolog A (C. elegans) (Unc93a), mRNA. // ch		5.99774	6.07683	5.83004	6.10223	5.95043	5.89176	5.71214	5.76827	5.87685	6.27154	5.94801	6.39963	6.22571	6.16099	5.96318	5.63659	6.17659	6.34507	5.90021	5.94232	6.50213	5.85674	6.28201	6.04841	6.50797	5.9872	5.72621	5.71758	5.79286	6.20137	6.00369	5.67993	6.02112	5.74045	5.79344	6.00276	5.74917	5.70619	5.9949	5.91329	6.43316
chr17	25099569	25115967	17342141	NM_001163661 // Telo2 // TEL2, telomere maintenance 2, homolog (S. cerevisiae) // 17 A3	Telo2	NM_001163661	NM_001163661 // RefSeq // Mus musculus TEL2, telomere maintenance 2, homolog (S. cerevi		7.46182	7.86993	8.14346	7.54063	7.95609	7.69925	7.6806	7.46944	7.66681	8.08889	7.80296	7.6735	7.83323	7.74314	8.25285	8.02115	8.11708	7.83798	7.93031	7.95619	7.76823	8.15046	7.69241	7.55541	7.73371	8.08536	7.69283	7.44428	7.89646	7.30651	7.973	7.41869	8.00494	7.74307	7.67873	7.8566	7.4714	7.73887	8.19701	7.87772	7.90125
chr17	22779858	22817747	17341433	NR_030709 // Gm16386 // predicted gene 16386 // 17 A3.3|17 // 100042679 /// NR_030709 /	Gm16386	NR_030709	NR_030709 // RefSeq // Mus musculus predicted gene 16386 (Gm16386), non-coding RNA. //		6.34203	5.65031	5.98826	5.89967	6.92301	6.145	7.04135	6.78416	6.12239	6.18348	5.67625	6.02386	6.15264	5.74201	5.96178	6.74467	6.17443	6.1609	6.5696	6.90349	6.2388	6.0613	6.04808	6.05205	5.89564	5.92493	7.44154	6.69143	7.09028	6.5261	6.83242	6.06026	6.22781	6.04993	6.77235	6.70137	7.1247	6.42679	6.57827	6.50591	7.43047
chr17	8260660	8262107	17333076	XR_141808 // Gm8465 // predicted gene 8465 // 17 A1|17 // 667114	Gm8465	XR_141808	XR_141808 // RefSeq // PREDICTED: Mus musculus predicted gene 8465 (Gm8465), miscRNA. /		6.65044	6.91184	6.67878	7.14043	6.51292	6.78679	6.7596	6.5673	6.34719	6.71192	7.05958	6.59306	6.87705	6.59471	6.43141	6.64102	6.69599	6.59174	7.02404	6.29112	6.51736	6.82636	6.29731	6.41219	6.05729	6.50385	6.71603	6.15495	6.94944	6.16978	6.37468	6.4982	6.93844	6.59726	6.58861	6.60873	6.80249	6.83639	6.77893	6.92532	5.97646
chr17	34597862	34600934	17336618	NM_007425 // Ager // advanced glycosylation end product-specific receptor // 17 B1|17 /	Ager	NM_007425	NM_007425 // RefSeq // Mus musculus advanced glycosylation end product-specific recepto		6.73859	7.02482	6.58061	6.92435	6.87925	6.74178	6.79559	6.88375	6.51194	6.98348	6.7722	6.67576	6.97053	6.75836	7.14069	6.55978	6.74144	7.65584	6.74679	6.89191	6.67576	6.39165	6.80062	6.53907	6.72018	6.51742	6.75894	6.71482	6.92414	6.39636	6.71472	7.1194	7.00455	6.73845	7.12028	6.75824	6.90014	6.90689	6.86467	7.24667	6.51845
chr17	5417323	5418767	17340493	NM_175349 // Ldhal6b // lactate dehydrogenase A-like 6B // 17 A1|17 // 106557 /// AY280	Ldhal6b	NM_175349	NM_175349 // RefSeq // Mus musculus lactate dehydrogenase A-like 6B (Ldhal6b), mRNA. //		6.38369	6.83113	6.9255	6.97411	6.50913	6.07099	6.56705	6.54387	6.82664	6.66624	6.40172	6.46041	6.55789	6.77372	6.35533	6.88321	7.2797	6.37711	6.58864	6.42506	6.86955	6.80658	6.58472	6.80939	6.84854	6.73756	6.78079	6.45866	6.26965	6.9403	6.65476	6.76817	6.61717	6.88297	6.45726	6.31679	6.61911	6.67114	6.57488	6.37313	6.99079
chr17	23972126	23975230	17341660	NM_013921 // Prss30 // protease, serine, 30 // 17 A3.3|17 10.71 cM // 30943 /// ENSMUST	Prss30	NM_013921	NM_013921 // RefSeq // Mus musculus protease, serine, 30 (Prss30), mRNA. // chr17 // 10		4.82243	5.10272	4.97527	5.14087	4.72073	4.90067	4.77294	4.83178	4.70796	4.83359	4.90556	4.84344	4.64602	4.76073	4.72582	4.82993	4.93116	5.02943	5.03398	5.11266	4.67282	4.89175	4.95314	4.78185	4.87089	4.83879	4.83892	4.75398	4.97358	4.65513	4.85757	4.71913	4.90413	5.00325	4.91915	5.10211	5.24993	4.67467	4.85857	5.03963	4.90219
chr17	25794894	25964784	17334780	ENSMUST00000002344 // Metrn // meteorin, glial cell differentiation regulator // 17 A3.	Metrn	ENSMUST00000002344	ENSMUST00000002344 // ENSEMBL // cdna:known chromosome:NCBIM37:17:25931894:25934081:-1		6.03903	6.34202	5.96654	6.02678	6.14936	5.96085	6.16549	5.97925	6.16133	6.17722	6.26538	6.00554	6.07152	6.04773	6.11156	6.16901	6.12626	5.98298	5.89754	5.90516	5.87357	6.0209	6.02172	6.01288	5.98053	5.77433	6.23577	5.90578	5.97521	5.92299	6.05181	6.18938	5.9704	5.88672	6.35912	5.76784	5.96537	6.06272	5.97236	6.09774	6.20786
chr17	34092340	34095234	17336396	NM_008206 // H2-Oa // histocompatibility 2, O region alpha locus // 17 B1|17 18.52 cM /	H2-Oa	NM_008206	NM_008206 // RefSeq // Mus musculus histocompatibility 2, O region alpha locus (H2-Oa),		5.08666	5.09685	5.1886	4.98337	4.98036	5.10247	5.0254	5.13787	5.02752	5.28308	5.09536	4.89303	4.72303	4.92758	4.97085	4.66229	5.09714	5.17499	5.20114	4.96012	5.22817	4.93093	5.29086	4.97174	4.84335	4.9287	5.194	4.90072	5.41792	5.12631	4.95281	4.94742	5.07174	4.86911	5.12985	4.82739	4.95004	4.91344	5.10136	5.33682	4.70688
chr17	14978864	14991577	17333493	NM_001123370 // 9030025P20Rik // RIKEN cDNA 9030025P20 gene // 17 A2|17 8.15 cM // 1000	9030025P20Rik	NM_001123370	NM_001123370 // RefSeq // Mus musculus RIKEN cDNA 9030025P20 gene (9030025P20Rik), mRNA		4.68053	5.58045	5.55194	5.605	5.1903	5.23423	5.5082	5.26978	5.57677	5.4144	4.56769	5.60639	5.05662	5.47168	5.02896	6.09392	5.68837	4.85045	5.30121	5.16014	5.14935	5.38133	5.51614	5.45783	5.5804	5.36483	5.6119	5.97197	5.36208	5.60864	5.80976	5.50346	5.70477	5.20974	5.30708	5.52092	5.11782	5.57149	5.19075	5.71298	5.49812
chr17	25875500	25886007	17334819	NM_026686 // 0610011F06Rik // RIKEN cDNA 0610011F06 gene // 17 A3.3|17 // 68347 /// ENS	0610011F06Rik	NM_026686	NM_026686 // RefSeq // Mus musculus RIKEN cDNA 0610011F06 gene (0610011F06Rik), mRNA. /		8.27598	7.56613	7.42089	7.69415	7.74477	7.79178	7.92529	8.307	8.47082	7.6532	7.67327	7.84566	7.62124	7.38952	8.05084	7.90755	8.02253	7.74756	7.74251	7.67997	8.06794	7.67978	7.82576	8.41533	7.6227	7.95395	7.73486	7.70075	7.72755	8.26532	7.72457	7.2664	7.83298	7.74426	7.45135	7.64215	7.7124	7.85316	7.92989	7.81188	7.4836
chr17	29135056	29148980	17335480	NM_001002786 // Rab44 // RAB44, member RAS oncogene family // 17 A3.3|17 // 442827 ///	Rab44	NM_001002786	NM_001002786 // RefSeq // Mus musculus RAB44, member RAS oncogene family (Rab44), mRNA.		6.46011	6.86148	6.87957	6.91627	6.71908	6.92353	6.79835	6.62302	7.31922	6.83176	7.12586	7.08099	6.72302	6.97931	7.21994	6.7067	6.89042	7.24466	6.70278	6.73079	7.03197	6.55642	6.99533	7.19619	6.32192	6.76315	6.38605	6.45785	6.6592	6.87107	6.368	6.99959	6.48361	6.7765	6.17414	6.52584	6.74457	6.69358	6.42218	6.55174	6.53268
chr17	34238903	34253905	17336476	NM_010389 // H2-Ob // histocompatibility 2, O region beta locus // 17 B1|17 18.63 cM //	H2-Ob	NM_010389	NM_010389 // RefSeq // Mus musculus histocompatibility 2, O region beta locus (H2-Ob),		5.43585	5.32887	5.28569	4.96032	5.51591	5.65068	5.46144	5.98632	5.62077	5.35567	5.71919	5.32836	5.536	5.28901	5.3641	5.51117	5.23672	5.70596	5.43486	5.24087	5.61977	5.67201	5.45819	5.2872	5.33913	5.34635	5.32032	5.33164	5.4057	5.73046	5.42127	5.43077	5.29701	5.53015	5.59179	4.9985	5.12968	5.41472	5.23669	5.73026	5.25325
chr17	24594978	24595071	17334354	---		---	ENSMUST00000116692 // ENSEMBL // ncrna:miRNA chromosome:NCBIM37:17:24731923:24732016:1		6.45809	6.61854	6.51313	6.72968	6.62923	6.35316	6.52587	6.58053	6.53139	6.09116	6.25567	6.56745	6.08771	6.45625	6.96129	6.94195	6.34024	6.46625	6.55048	6.50295	6.65155	6.27903	6.50682	6.93286	6.64778	6.55508	6.47452	6.41115	6.24237	6.33933	6.28952	6.0696	6.61568	6.04906	6.47062	6.51296	6.68995	6.52468	6.60087	7.16227	6.34111
chr17	8988333	9008319	17333169	NM_025851 // 1700010I14Rik // RIKEN cDNA 1700010I14 gene // 17 A1|17 // 66931 /// ENSMU	1700010I14Rik	NM_025851	NM_025851 // RefSeq // Mus musculus RIKEN cDNA 1700010I14 gene (1700010I14Rik), mRNA. /		6.3326	5.79922	6.34733	5.67176	5.70597	5.90373	6.16845	5.62439	5.44632	5.95891	5.67604	6.61335	5.98442	5.66836	6.09284	5.64781	5.84299	6.28067	5.67144	5.52261	5.55327	6.00449	5.93085	5.32223	5.80271	6.02825	5.54091	6.14955	5.89468	5.56941	5.47531	5.89915	5.55201	5.8298	5.87634	5.80426	5.32453	5.86755	5.47311	5.35828	5.71126
chr17	34647146	34655074	17336660	ENSMUST00000015605 // Atf6b // activating transcription factor 6 beta // 17 B1|17 18.85	Atf6b	ENSMUST00000015605	ENSMUST00000015605 // ENSEMBL // cdna:known chromosome:NCBIM37:17:34784091:34792019:1 g		8.75027	7.76662	8.04017	8.47453	8.118	8.57404	7.87374	8.90245	8.67203	7.83909	8.05638	8.28991	8.19447	8.00445	8.41466	8.5071	8.46014	7.99776	7.95831	8.48894	8.70302	8.50392	7.90926	8.60221	7.97309	7.98368	8.03929	7.79995	8.31511	8.20077	8.01449	7.68001	8.21268	8.4674	8.17867	8.21825	7.9	8.12129	8.10477	7.97875	8.21345
chr17	34856374	34862518	17344064	NM_008198 // Cfb // complement factor B // 17 B1|17 18.85 cM // 14962 /// NM_001142706	Cfb	NM_008198	NM_008198 // RefSeq // Mus musculus complement factor B (Cfb), transcript variant 1, mR		7.10388	6.72645	6.14201	6.66565	6.35553	6.11589	6.6009	6.42543	7.77031	6.19417	5.99229	7.09616	6.4283	7.40807	7.17088	6.44851	6.33986	6.4485	6.76018	7.14119	7.45803	5.85377	6.63955	6.48175	6.20705	6.64992	6.08861	7.10267	6.27212	6.80164	6.07135	6.5177	6.97407	8.26397	6.31994	6.02699	6.24189	5.75628	5.89471	5.9744	5.63197
chr17	27655509	27711106	17335145	NM_011861 // Pacsin1 // protein kinase C and casein kinase substrate in neurons 1 // 17	Pacsin1	NM_011861	NM_011861 // RefSeq // Mus musculus protein kinase C and casein kinase substrate in neu		6.7884	6.97857	6.96238	6.68219	6.52933	6.95762	6.98267	6.42548	6.34231	7.48204	6.81767	7.05443	6.67392	7.4091	6.91356	6.66799	7.18463	7.50384	6.83696	7.20001	6.14597	6.98736	6.93415	6.27781	6.87903	7.45138	6.35652	6.81387	7.15714	6.11085	7.29611	7.09322	6.73168	7.25257	7.02007	6.95901	6.54931	6.63271	6.61031	7.58946	6.55329
chr17	22846697	22867134	17341440	NM_177358 // Zfp945 // zinc finger protein 945 // 17 A3.3|17 // 240041 /// NM_001110254	Zfp945	NM_177358	NM_177358 // RefSeq // Mus musculus zinc finger protein 945 (Zfp945), transcript varian		8.69028	8.30653	8.24572	8.10453	8.79338	8.03622	9.17824	8.84072	8.90177	8.34577	8.11996	8.4683	8.39762	8.51049	8.1571	8.81691	9.10835	8.52541	8.55486	8.78416	8.9221	8.37909	8.91584	9.21427	8.1584	7.90371	9.74127	9.01672	8.2842	9.31339	8.65389	8.75536	8.68447	8.7431	7.94688	8.72327	8.37338	8.65001	8.23317	8.72672	8.75392
chr17	29652231	29658313	17343076	XR_107056 // Gm20161 // predicted gene, 20161 // --- // 100504304	Gm20161	XR_107056	AK156427 // GenBank HTC // Mus musculus activated spleen cDNA, RIKEN full-length enrich		4.20252	4.25323	4.47219	4.47097	4.48353	4.76271	4.77856	4.41666	4.63167	4.22938	4.81618	4.26569	4.68782	4.64152	4.76666	4.57005	4.64457	4.52372	4.26315	4.55137	4.63161	4.51257	4.18493	4.15714	4.28054	4.75981	4.60904	4.4833	4.02504	4.28614	4.30437	4.65942	4.24031	4.50206	4.52098	4.75231	4.98067	4.64674	4.28065	4.1803	4.45769
chr17	34950235	34952471	17344114	NR_027943 // 1110038B12Rik // RIKEN cDNA 1110038B12 gene // 17 B1|17 // 68763 /// NR_01	1110038B12Rik	NR_027943	NR_027943 // RefSeq // Mus musculus RIKEN cDNA 1110038B12 gene (1110038B12Rik), transcr		9.78428	10.1606	10.3533	10.0584	10.4162	9.64553	10.0856	9.08624	9.51515	10.3762	9.67017	9.58729	10.143	9.9298	10.3364	9.80866	10.5351	10.2774	10.3422	10.2125	9.26691	9.86572	9.91178	9.50192	9.46008	10.1259	9.85848	9.85453	10.3816	9.13134	9.90399	9.62035	10.137	10.1844	10.3148	10.2513	10.0364	9.9274	10.5815	10.4225	9.87679
chr17	25877628	25880858	17342491	NM_001100454 // Wfikkn1 // WAP, FS, Ig, KU, and NTR-containing protein 1 // 17 A3.3|17	Wfikkn1	NM_001100454	NM_001100454 // RefSeq // Mus musculus WAP, FS, Ig, KU, and NTR-containing protein 1 (W		6.13514	6.62221	5.9909	5.88232	6.37346	6.20775	6.24628	6.27934	6.12532	6.12514	6.57111	5.97761	6.54007	5.8652	6.6346	6.22493	6.15134	6.36256	6.16175	6.08666	6.00072	6.06698	5.91951	5.79869	5.71988	6.00482	6.11918	5.80658	5.98812	5.88084	6.0105	6.13648	6.29494	6.0177	6.32782	5.8549	5.91768	6.04724	5.93275	6.47774	5.59341
chr17	7170115	7303315	17332974	NM_011299 // Rps6ka2 // ribosomal protein S6 kinase, polypeptide 2 // 17 F4|17 3.65 cM	Rps6ka2	NM_011299	NM_011299 // RefSeq // Mus musculus ribosomal protein S6 kinase, polypeptide 2 (Rps6ka2		9.40806	9.16403	8.88853	9.32086	8.73753	9.64447	8.72337	8.22836	7.64446	8.41278	9.04136	9.87578	9.01598	8.79226	9.43029	9.35191	8.83417	9.09183	8.99259	8.73791	6.75211	9.49727	7.99085	7.5192	8.07514	8.04619	8.22577	8.19577	8.1756	7.98685	9.44985	9.65685	9.67938	9.06104	9.13139	9.37497	8.52985	8.78173	7.18864	8.10003	8.73224
chr17	23868056	23873114	17334158	NM_020487 // Prss21 // protease, serine, 21 // 17 A3.3-B|17 10.72 cM // 57256 /// ENSMU	Prss21	NM_020487	NM_020487 // RefSeq // Mus musculus protease, serine, 21 (Prss21), mRNA. // chr17 // 10		4.61563	4.67408	4.58675	4.60106	4.48167	5.00661	4.81456	4.46229	4.48668	4.59862	4.95251	4.66544	4.71107	4.60782	5.01396	4.63769	4.51914	4.47748	4.81173	4.52182	4.39825	4.77172	4.59238	4.53881	4.4157	4.80203	4.58907	4.42554	4.75948	4.62436	4.39789	4.70714	4.85224	4.55105	4.64026	4.28698	4.8245	4.84625	4.80186	4.78217	4.31148
chr17	17374332	17394899	17333672	NM_025934 // Riok2 // RIO kinase 2 (yeast) // 17|17 A3.1 // 67045 /// ENSMUST0000002462	Riok2	NM_025934	NM_025934 // RefSeq // Mus musculus RIO kinase 2 (yeast) (Riok2), mRNA. // chr17 // 100		9.2541	9.55482	9.77139	9.40792	9.60677	9.32583	9.85445	9.17865	9.53734	9.84373	9.37838	9.72815	9.49171	9.5259	9.48164	9.54901	10.1568	9.34073	9.66695	9.47783	9.39678	9.43813	9.36524	9.79195	9.64889	9.76145	9.9599	9.4652	9.69135	9.41207	9.61114	9.5331	9.72009	10.0646	9.28486	9.81006	9.7958	9.81901	9.87897	9.71124	9.76913
chr17	21816876	21845759	17341365	NM_029281 // Zfp820 // zinc finger protein 820 // 17 A3.3|17 // 75424 /// ENSMUST000000	Zfp820	NM_029281	NM_029281 // RefSeq // Mus musculus zinc finger protein 820 (Zfp820), mRNA. // chr17 //		3.75635	3.59324	3.26397	4.11566	3.81943	3.80585	3.54525	3.59957	4.11695	3.49065	4.08105	3.53015	3.24429	3.04362	3.39912	3.2858	3.37321	3.75005	3.16703	3.66269	3.55009	3.49129	3.17476	3.53759	3.23204	3.20387	4.74668	3.00043	3.67885	4.51979	3.67935	2.90686	3.42591	3.64253	3.30879	3.23647	2.7337	3.94209	3.63213	3.48376	4.11695
chr17	10496446	10569396	17333198	---		---	ENSMUST00000161091 // ENSEMBL // cdna:putative chromosome:NCBIM37:17:10689319:10746035:		4.18783	4.31466	4.52345	4.82895	4.35923	4.35368	4.49968	4.50071	4.4772	4.30724	4.4573	4.3404	4.22494	4.42789	4.30739	3.92043	4.41691	4.21711	4.23263	3.94314	4.32538	4.12756	4.42546	4.02796	4.44167	4.24837	4.36952	4.20635	4.2547	4.59238	4.53532	4.44751	4.35135	4.31058	4.4054	4.59764	4.14978	4.24217	4.12701	4.3891	3.86453
chr17	24595937	24632629	17341917	NM_011647 // Tsc2 // tuberous sclerosis 2 // 17 A3.3|17 10.3 cM // 22084 /// ENSMUST000	Tsc2	NM_011647	NM_011647 // RefSeq // Mus musculus tuberous sclerosis 2 (Tsc2), transcript variant 1,		9.87962	9.78067	9.75292	9.81861	9.64388	9.83062	9.73865	9.76015	9.86889	9.52271	9.66442	9.83282	9.49879	9.89334	10.0217	9.96101	10.004	9.82098	9.55685	9.70874	9.80169	9.74346	9.81177	9.91563	9.83065	10.0198	9.42769	9.4987	9.50167	9.76107	9.63408	9.70153	9.65315	10.0559	9.97981	9.8018	9.6096	9.70698	9.75231	9.66268	9.73605
chr17	6511759	6582703	17340570	XM_001474822 // Gm2808 // predicted gene 2808 // 17 A1|17 // 100040500	Gm2808	XM_001474822	XM_001474822 // RefSeq // PREDICTED: Mus musculus predicted gene 2808 (Gm2808), mRNA. /		7.58197	6.96605	6.63883	7.17074	6.95603	7.7549	7.19974	8.25892	7.94839	7.04443	7.43169	7.41349	7.37511	7.33433	7.76038	7.34016	7.31752	7.11478	7.25922	6.97093	7.44874	7.35841	7.74049	7.87097	7.21719	6.92034	6.78226	8.00114	6.97377	7.59149	7.34587	7.28129	6.77277	7.03402	7.35848	7.30731	7.2992	7.27179	6.96221	7.16662	6.95852
chr17	32027938	32028208	17335900	---		---	ENSMUST00000157781 // ENSEMBL // ncrna:misc_RNA chromosome:NCBIM37:17:32164883:32165153		5.31688	4.82288	4.67289	4.86574	4.84816	5.02671	4.65893	4.61048	4.67446	4.81846	5.06836	4.89016	4.60927	4.86262	4.5673	4.47939	4.72304	4.7764	4.52197	4.56124	4.65418	4.63558	4.67678	4.57254	4.53411	4.87666	4.79232	4.91272	4.76426	4.52479	4.85321	4.63845	4.73181	4.80659	4.54813	4.74898	4.86918	4.9614	4.63181	4.62252	4.22189
chr17	34398820	34460734	17336536	NM_001001177 // BC051142 // cDNA sequence BC051142 // 17 B1|17 18.0 cM // 407788 /// EN	BC051142	NM_001001177	NM_001001177 // RefSeq // Mus musculus cDNA sequence BC051142 (BC051142), transcript va		4.86006	4.70753	4.93456	4.779	4.62702	4.58781	4.77004	4.37214	4.50871	6.00492	4.41283	7.18813	4.49724	4.66225	5.78429	5.67043	4.65266	6.31077	5.3166	4.8152	4.2008	4.69179	4.71921	4.3658	4.63708	6.12157	7.36007	6.05067	6.07088	4.64519	4.8918	7.00827	4.27979	5.04208	4.95004	4.56742	6.08656	7.52197	7.58762	5.85406	5.25722
chr17	24848896	24850302	17342038	NM_023480 // Fahd1 // fumarylacetoacetate hydrolase domain containing 1 // 17 A3.3|17 /	Fahd1	NM_023480	NM_023480 // RefSeq // Mus musculus fumarylacetoacetate hydrolase domain containing 1 (		6.60216	7.13211	7.16283	6.21984	6.57126	6.70448	6.96729	6.46807	6.79888	7.35806	6.54932	6.90087	6.6321	6.75568	6.6829	6.84422	7.4607	6.75482	6.98956	6.75982	6.56593	6.86332	7.1497	6.59723	6.88525	6.84213	6.62042	7.34567	7.15793	6.5984	6.6842	6.63504	6.99315	6.884	6.98666	7.01835	6.86114	6.77037	7.30654	6.99951	7.12679
chr17	28933986	28942262	17342958	NM_153390 // Pxt1 // peroxisomal, testis specific 1 // 17 A3.3|17 // 69307 /// ENSMUST0	Pxt1	NM_153390	NM_153390 // RefSeq // Mus musculus peroxisomal, testis specific 1 (Pxt1), mRNA. // chr		6.50165	6.60911	6.333	6.02624	6.46536	6.41797	6.72027	6.62625	6.58216	6.79134	6.45675	6.36289	6.43836	6.55763	5.88814	6.39081	6.54469	6.5802	6.36241	6.42396	6.37024	6.54694	6.42213	6.27387	6.20128	6.62771	6.67414	6.125	6.4221	6.70977	6.62558	6.69136	6.54065	6.40889	6.7781	6.39686	6.75711	6.42418	6.38317	6.7232	6.25667
chr17	20913205	20914363	17341350	NM_134193 // Vmn1r232 // vomeronasal 1 receptor 232 // 17 A3.2|17 // 171227 /// ENSMUST	Vmn1r232	NM_134193	NM_134193 // RefSeq // Mus musculus vomeronasal 1 receptor 232 (Vmn1r232), mRNA. // chr		4.72132	4.85706	4.73347	5.08824	4.70233	4.6405	4.55339	4.50486	4.63921	4.60791	4.56258	4.42639	4.85204	4.85612	4.75324	4.66931	4.58382	4.7983	4.74031	4.46294	4.59796	5.078	4.3046	4.32453	4.49041	4.70254	4.96155	4.45401	4.76662	4.70414	4.80238	4.75872	4.74636	4.57968	4.61675	4.57858	5.22583	4.64985	4.56062	4.77185	4.70229
chr17	23953085	23955273	17341655	NM_001077421 // Sbpl // spermine binding protein-like // 17 A3.3|17 // 638345 /// ENSMU	Sbpl	NM_001077421	NM_001077421 // RefSeq // Mus musculus spermine binding protein-like (Sbpl), mRNA. // c		5.76046	5.76734	5.25167	5.08213	5.68884	6.18039	5.65086	5.72261	5.55911	4.86424	5.76178	5.32414	5.82716	5.38589	5.45382	5.79698	5.48994	5.88566	5.1394	5.6984	5.42676	5.73128	5.70714	5.41501	5.3162	5.69691	5.83431	5.35126	5.81591	5.8016	5.58646	5.56586	5.53874	5.61123	5.7159	5.46711	5.48194	5.71959	5.40901	5.77961	5.50481
chr17	34325665	34341410	17336509	NM_001033978 // H2-Eb2 // histocompatibility 2, class II antigen E beta2 // 17 B1|17 18	H2-Eb2	NM_001033978	NM_001033978 // RefSeq // Mus musculus histocompatibility 2, class II antigen E beta2 (		4.61465	4.65666	4.66022	4.95289	4.93827	4.5066	4.69969	4.76859	4.78448	4.67199	4.79793	4.86331	4.50174	4.74548	4.80037	4.63114	5.00835	4.46755	4.32348	4.49048	4.91018	4.50558	4.52836	4.55148	4.5336	4.62693	4.67753	4.62924	4.96729	5.16425	4.86631	4.787	4.55124	5.3192	4.89962	4.64889	4.38316	4.62003	4.72961	4.47609	4.5321
chr17	24840143	24864450	17334449	NM_024284 // Hagh // hydroxyacyl glutathione hydrolase // 17 A3.3|17 11.0 cM // 14651 /	Hagh	NM_024284	NM_024284 // RefSeq // Mus musculus hydroxyacyl glutathione hydrolase (Hagh), nuclear g		8.36034	8.56281	8.27048	8.42284	8.54914	8.50578	8.495	8.48826	8.02473	8.99558	8.35175	8.38529	8.28192	8.40198	8.47826	8.46197	8.74489	8.35558	8.60355	8.59316	8.06469	8.49431	8.59159	8.19448	8.25544	8.36614	8.14318	8.51479	8.47803	8.15481	8.48036	8.28642	8.71851	8.36248	8.6491	8.56926	8.16821	8.45702	8.42222	8.70361	8.20144
chr17	33432897	33434268	17336082	NM_183282 // Actl9 // actin-like 9 // 17 B1|17 // 69481 /// ENSMUST00000174088 // Actl9	Actl9	NM_183282	NM_183282 // RefSeq // Mus musculus actin-like 9 (Actl9), mRNA. // chr17 // 100 // 100		4.81953	4.94959	5.13058	4.62259	4.84917	4.9977	5.20694	4.96669	5.14284	4.8418	5.01836	4.9666	4.69734	5.02095	4.75612	4.74409	5.12965	5.14285	4.95936	4.8694	5.07683	4.52022	4.91671	4.90137	5.11328	5.30117	5.17356	4.80108	5.48878	5.13068	4.9805	5.10717	4.68353	4.66827	4.95644	5.26222	5.34529	5.02729	4.88771	4.62862	4.7722
chr17	25188397	25234443	17334602	NM_001197024 // Unkl // unkempt-like (Drosophila) // 17 A3.3|17 // 74154 /// ENSMUST000	Unkl	NM_001197024	NM_001197024 // RefSeq // Mus musculus unkempt-like (Drosophila) (Unkl), transcript var		8.03512	8.59825	8.55492	8.85087	8.20229	8.49886	8.40204	8.00008	7.9082	8.63865	8.58219	8.19964	8.39237	8.40112	8.72121	8.58122	8.56291	8.56802	8.37119	8.36146	8.11257	8.53115	8.14705	7.91574	8.46138	8.6798	8.36968	8.13268	8.29088	8.01946	8.21871	8.61004	8.3555	8.79435	8.47591	8.22291	8.14185	8.5721	8.55996	8.61679	8.60477
chr17	24719531	24719965	17342024	NR_027900 // Snhg9 // small nucleolar RNA host gene (non-protein coding) 9 // 17 A3.3|1	Snhg9	NR_027900	NR_027900 // RefSeq // Mus musculus small nucleolar RNA host gene (non-protein coding)		5.26873	5.61235	5.25995	6.10679	5.51841	5.39287	5.14108	4.93447	5.01167	5.31339	5.56502	5.07904	5.36989	4.92045	5.88457	5.3343	5.2833	5.53598	5.32258	5.24883	5.02225	5.2383	5.34918	5.03868	4.90753	5.18944	4.80481	4.8706	5.0123	4.85141	4.93193	5.04218	5.46281	4.73661	5.33696	4.96075	4.7537	4.99569	5.3494	5.37659	5.02522
chr17	35080480	35085610	17344208	ENSMUST00000038507 // Ly6g6f // lymphocyte antigen 6 complex, locus G6F // 17 B1|17 //	Ly6g6f	ENSMUST00000038507	ENSMUST00000038507 // ENSEMBL // cdna:novel chromosome:NCBIM37:17:35217425:35222555:-1		5.2623	5.36241	5.25336	5.56836	5.51264	5.56555	5.49429	5.51945	5.18271	5.56962	5.65273	5.07197	5.59551	5.38701	5.12525	4.90227	5.32684	5.50706	5.37196	5.3784	5.03701	5.24833	5.63645	5.36815	5.43118	5.3903	5.21406	5.13157	5.50506	5.0929	5.30284	5.42184	5.34861	5.45422	5.47945	5.35942	5.54646	5.36648	5.29054	5.5325	5.43628
chr17	28637783	28689987	17342916	BC027076 // Slc26a8 // solute carrier family 26, member 8 // 17 A3.3|17 13.4 cM // 2246	Slc26a8	BC027076	BC027076 // GenBank // Mus musculus solute carrier family 26, member 8, mRNA (cDNA clon		4.95574	5.811	5.42643	5.23478	5.37031	5.6679	5.52668	5.30246	5.04608	6.02867	5.4076	5.40132	5.35163	5.29869	5.77311	5.2703	5.18836	6.55228	5.1332	5.1957	5.11664	5.23963	5.60111	5.84081	5.14099	5.70092	5.36272	5.29372	5.23031	5.0593	5.34806	5.74597	5.43462	5.03099	6.57026	5.02843	5.44635	5.11026	5.23371	6.03767	5.19795
chr17	35533201	35534647	17337193	NM_020576 // Psors1c2 // psoriasis susceptibility 1 candidate 2 (human) // 17 B1|17 //	Psors1c2	NM_020576	NM_020576 // RefSeq // Mus musculus psoriasis susceptibility 1 candidate 2 (human) (Pso		5.71054	6.26979	5.49225	6.32198	5.89195	5.89198	5.55221	5.80833	5.57631	5.41941	6.2052	5.64987	6.07697	5.77728	6.26449	5.83581	5.69574	6.20984	5.94654	5.66517	5.94571	6.04471	5.86132	5.57302	5.69418	5.7949	5.58126	5.65794	5.63875	5.53902	5.66671	6.464	5.96128	5.54624	5.81456	5.60475	5.93939	5.99086	5.72974	6.42494	6.02227
chr17	34589806	34591754	17336595	NM_134116 // Gpsm3 // G-protein signalling modulator 3 (AGS3-like, C. elegans) // 17 B1	Gpsm3	NM_134116	NM_134116 // RefSeq // Mus musculus G-protein signalling modulator 3 (AGS3-like, C. ele		6.52635	7.36096	7.15895	7.81732	7.043	7.5476	6.8365	7.01154	6.68244	7.02508	7.40483	7.45314	7.06866	7.05496	7.2981	7.31229	6.83133	6.86197	6.8746	7.29163	6.6704	6.9638	6.97281	6.65034	6.98573	6.45601	6.19948	6.86062	6.79303	6.26471	6.56948	7.29163	6.75062	6.85628	6.53504	6.87401	6.80006	6.84474	6.52047	6.68764	6.88597
chr17	32765182	32788287	17343461	NM_172458 // Zfp871 // zinc finger protein 871 // 17 B1|17 // 208292 /// ENSMUST0000015	Zfp871	NM_172458	NM_172458 // RefSeq // Mus musculus zinc finger protein 871 (Zfp871), mRNA. // chr17 //		9.45951	9.64548	9.82029	9.35285	9.53165	9.39926	9.7457	9.1446	9.33208	9.83504	9.46276	9.63847	9.62697	9.89772	9.78468	9.51589	10.1356	9.99002	9.55894	9.8043	9.50588	9.68327	9.70205	9.40062	10.0818	9.88517	9.92063	9.5589	9.78963	9.29234	9.68133	10.0182	9.98579	10.1561	9.46846	9.77837	9.85956	9.80282	9.87079	9.99136	10.1312
chr17	24409481	24414513	17341836	NR_033554 // D330041H03Rik // RIKEN cDNA D330041H03 gene // 17 A3.3|17 // 654822	D330041H03Rik	NR_033554	NR_033554 // RefSeq // Mus musculus RIKEN cDNA D330041H03 gene (D330041H03Rik), non-cod		6.59885	7.23372	7.88722	7.69956	7.27938	7.19519	7.13896	6.56422	7.22716	7.31536	7.54641	7.49624	7.93084	7.43597	7.07844	7.38726	7.85076	6.27277	7.24388	7.40833	7.56749	7.44422	6.93179	7.63089	7.3674	7.48701	7.76925	7.47139	7.24222	7.67152	7.51583	7.64699	7.68094	7.5936	7.37954	7.43472	7.36762	7.30532	7.55518	6.95067	7.79891
chr17	14195230	14203831	17341069	NM_172826 // Dact2 // dapper homolog 2, antagonist of beta-catenin (xenopus) // 17|17 A	Dact2	NM_172826	NM_172826 // RefSeq // Mus musculus dapper homolog 2, antagonist of beta-catenin (xenop		7.70501	7.41821	6.73897	6.85912	7.57782	7.00674	7.34951	7.33744	7.13329	7.78489	6.76603	7.01061	6.82959	6.82311	7.17718	7.46158	7.02767	7.76041	7.30653	6.94461	7.19292	6.54875	7.4221	6.63882	6.91328	7.35975	6.94599	7.22296	7.07297	7.37557	6.66067	7.15084	6.86223	7.02292	6.80938	6.62256	7.04603	6.70514	7.37066	7.4791	6.81613
chr17	23629458	23645269	17341508	NM_001033339 // Mmp25 // matrix metallopeptidase 25 // 17 A3.3|17 // 240047 /// ENSMUST	Mmp25	NM_001033339	NM_001033339 // RefSeq // Mus musculus matrix metallopeptidase 25 (Mmp25), mRNA. // chr		5.51413	5.30311	5.38982	5.58464	5.57615	5.65151	5.6272	5.77411	5.63387	5.52735	5.57199	5.57374	5.82203	5.56889	5.66862	5.47544	5.71018	5.7149	5.58597	5.23051	5.52418	5.33377	5.72903	5.59532	5.42299	5.54445	5.62972	5.31943	5.50155	5.34781	5.54117	5.41992	5.5709	5.66078	5.46986	5.40763	5.5984	5.52901	5.40695	5.58071	5.27803
chr17	28232754	28301469	17335297	NM_011145 // Ppard // peroxisome proliferator activator receptor delta // 17 A3.3|17 13	Ppard	NM_011145	NM_011145 // RefSeq // Mus musculus peroxisome proliferator activator receptor delta (P		8.30674	8.7106	8.31469	8.57964	8.4951	8.92169	7.97723	9.02511	8.71818	7.85895	8.96172	8.25539	8.6356	8.48641	8.99635	8.4527	8.55333	8.34567	8.44885	8.34666	8.7168	8.60771	7.89795	8.59811	8.03609	7.79201	7.86098	7.84212	7.69888	8.23014	8.00637	8.63342	8.37259	9.06863	8.31002	8.18282	7.93735	7.8158	7.91648	7.99894	7.89098
chr17	25863698	25868738	17342483	BC024332 // Fam195a // family with sequence similarity 195, member A // 17|17 B1 // 682	Fam195a	BC024332	BC024332 // GenBank // Mus musculus RIKEN cDNA 9530058B02 gene, mRNA (cDNA clone MGC:35		6.74884	6.22618	6.19113	6.13558	6.76812	6.4686	6.44168	7.3311	6.79692	6.79642	6.38276	6.90181	6.69406	6.38016	6.36684	6.69406	7.10337	6.20661	6.2563	6.81258	7.05395	6.62755	6.87173	6.79577	5.98155	6.61428	6.28146	6.70777	6.55276	7.11148	6.55062	6.573	6.72834	6.33316	6.43468	6.36412	6.58208	6.65532	6.63894	6.40302	6.42104
chr17	32788394	32789591	17336028	---		---	AK085908 // GenBank HTC // Mus musculus 16 days neonate heart cDNA, RIKEN full-length e		5.29482	5.61954	6.30438	6.11779	5.24269	5.40226	5.67	5.07174	4.96872	5.2699	5.77927	6.02069	5.43113	5.87762	5.15992	5.66747	6.17479	5.64523	5.41075	5.40004	5.01316	5.60066	5.10859	5.16398	6.27224	5.53829	5.93752	5.44372	5.66982	5.0821	5.95389	5.47851	5.71157	5.62484	4.78466	5.68534	5.74251	5.86915	5.74749	5.21315	6.12231
chr17	23743234	23754065	17334113	NR_015472 // 9530082P21Rik // RIKEN cDNA 9530082P21 gene // 17 A3.3|17 // 638247	9530082P21Rik	NR_015472	NR_015472 // RefSeq // Mus musculus RIKEN cDNA 9530082P21 gene (9530082P21Rik), non-cod		6.30696	6.60385	6.22596	6.36049	6.3037	6.32338	6.21514	6.78025	6.6326	6.22838	6.76338	6.31679	6.3915	6.29276	6.87587	6.25115	6.42173	6.22044	6.41554	6.42925	6.48757	6.02451	6.4535	6.65196	6.03526	6.10039	6.40662	6.45375	6.13677	6.41679	6.36415	6.37455	6.28301	6.34343	6.47042	5.96272	6.65689	6.35121	6.2957	6.38747	6.03973
chr17	28328471	28331033	17335330	NM_011287 // Rpl10a // ribosomal protein L10A // 17 A3.3|17 // 19896 /// ENSMUST0000004	Rpl10a	NM_011287	NM_011287 // RefSeq // Mus musculus ribosomal protein L10A (Rpl10a), mRNA. // chr17 //		9.57644	9.14881	8.67947	9.20817	9.25416	8.93565	8.75927	9.47232	9.00604	9.02542	8.4621	9.10448	8.61157	8.63766	9.3933	8.65457	9.17785	8.64097	9.04278	8.9942	9.35049	8.74902	9.00599	9.34045	8.81664	9.11888	9.10911	9.23246	9.02299	9.00063	9.08048	8.91886	9.07389	8.8481	8.54926	8.98419	8.84623	9.04868	8.99539	9.21551	8.80633
chr17	35108279	35111991	17336965	ENSMUST00000037849 // Ly6g5c // lymphocyte antigen 6 complex, locus G5C // 17 B1|17 //	Ly6g5c	ENSMUST00000037849	ENSMUST00000037849 // ENSEMBL // cdna:known chromosome:NCBIM37:17:35245224:35248936:1 g		5.22097	5.45019	5.21629	4.93638	5.6398	5.60329	5.44012	5.29286	5.34745	5.40347	5.57168	5.69323	5.43426	5.17508	5.66218	5.16514	5.27325	5.59506	5.53213	5.48452	5.25246	5.02235	5.39789	5.34506	5.3203	5.40545	5.05355	5.13603	5.24685	5.45945	5.85709	5.55884	5.47755	5.26569	5.34333	5.23851	5.78265	5.16237	5.49737	5.76756	5.21723
chr17	23803187	23824741	17334129	ENSMUST00000073292 // Srrm2 // serine/arginine repetitive matrix 2 // 17 A3.3|17 // 759	Srrm2	ENSMUST00000073292	ENSMUST00000073292 // ENSEMBL // cdna:known chromosome:NCBIM37:17:23940166:23961192:1 g		11.5879	11.224	11.2552	11.0029	11.4318	11.3135	11.2468	11.3664	11.4776	11.3258	11.328	11.2604	11.4619	11.3009	11.8723	11.2897	11.5127	11.681	11.3004	11.2872	11.505	11.3152	11.259	11.4323	11.3029	11.4413	11.047	11.1977	10.9528	11.4244	11.1356	11.3212	11.1674	11.4769	11.2996	11.4375	11.2711	11.1805	11.3648	11.2452	11.3584
chr17	26091734	26095508	17342595	NM_019731 // Nme4 // NME/NM23 nucleoside diphosphate kinase 4 // 17|17 B1 // 56520 ///	Nme4	NM_019731	NM_019731 // RefSeq // Mus musculus NME/NM23 nucleoside diphosphate kinase 4 (Nme4), nu		6.93906	7.89607	7.53713	7.19781	7.34135	6.77445	7.27799	6.67872	6.37224	7.65336	6.66082	7.42016	6.89104	7.33235	6.90319	7.66347	7.8383	7.29473	7.44315	7.57054	6.53858	7.0209	7.5241	7.09554	7.82266	7.9744	8.1555	7.54541	7.61813	6.53188	7.71511	7.10509	7.66398	7.45831	6.63651	7.67159	7.88975	7.66538	7.78811	7.79431	7.28655
chr17	31520115	31531326	17335865	NM_030087 // Ndufv3 // NADH dehydrogenase (ubiquinone) flavoprotein 3 // 17 B1|17 // 78	Ndufv3	NM_030087	NM_030087 // RefSeq // Mus musculus NADH dehydrogenase (ubiquinone) flavoprotein 3 (Ndu		8.19092	8.45014	8.3748	8.18727	8.29941	7.92178	7.98963	8.30842	8.11418	8.0368	8.03425	8.29941	8.1698	8.0511	8.36501	8.41634	8.80251	7.94879	8.28734	8.16786	7.77491	8.14432	7.95252	8.1692	8.42504	8.42801	8.18042	8.46626	8.17863	7.94841	8.30207	8.33939	8.20898	8.05786	8.11882	8.31408	8.02909	8.35763	8.38625	8.11539	8.10147
chr17	25366333	25368859	17334666	NM_010781 // Tpsb2 // tryptase beta 2 // 17 A3.3|17 10.39 cM // 17229 /// ENSMUST000000	Tpsb2	NM_010781	NM_010781 // RefSeq // Mus musculus tryptase beta 2 (Tpsb2), mRNA. // chr17 // 100 // 8		4.52908	4.50732	4.47154	4.87076	4.94853	4.55728	4.49522	5.17715	4.99035	4.79663	4.53208	4.42035	4.56252	4.85886	4.82192	4.86043	4.32902	4.93017	4.43211	4.22583	4.6921	4.61509	5.00576	4.31863	4.28165	4.63406	4.78644	5.1903	4.56306	4.86487	4.38635	4.52328	4.5767	4.78254	4.34809	4.55061	4.51351	4.28483	4.61978	4.66639	4.53757
chr17	35049218	35049321	17336894	---		---	ENSMUST00000083205 // ENSEMBL // ncrna:snRNA chromosome:NCBIM37:17:35186163:35186266:1		3.93392	3.6091	3.8494	3.77489	3.50032	3.60379	3.48122	3.40748	4.37283	4.1725	3.60991	3.04483	3.30018	3.6089	3.31034	3.58157	3.68273	3.54966	3.46135	3.22705	3.32922	3.49757	3.32431	3.92182	3.23874	3.38619	3.47715	4.33944	3.58337	3.76541	3.47301	3.79291	3.31148	3.4549	3.02454	3.3193	3.26805	3.75123	3.41746	3.73347	3.17789
chr17	26232344	26232881	17547992	XM_003086048 // Gm20026 // predicted gene, 20026 // --- // 100504036	Gm20026	XM_003086048	XM_003086048 // RefSeq // PREDICTED: Mus musculus predicted gene, 20026 (Gm20026), mRNA		4.73277	4.63502	4.80729	4.90975	4.48827	4.94333	4.8661	4.98361	4.56155	4.73644	4.73887	4.81752	4.63807	4.73694	4.6368	4.49668	4.70797	4.82089	5.04226	4.68546	4.8475	4.6992	4.58721	4.82175	4.43068	4.61114	4.88295	4.84695	4.83595	4.54979	4.74946	4.72008	4.67877	4.74703	5.09316	4.92176	5.10965	4.65541	4.98795	4.76087	4.42068
chr17	24669752	24682016	17334365	NM_183149 // Zfp598 // zinc finger protein 598 // 17 A3.3|17 // 213753 /// ENSMUST00000	Zfp598	NM_183149	NM_183149 // RefSeq // Mus musculus zinc finger protein 598 (Zfp598), mRNA. // chr17 //		7.91253	7.71941	7.61593	7.34579	7.81866	7.76091	7.4687	7.73469	7.73979	7.69009	7.45167	7.5643	7.75757	7.58271	8.30572	7.68596	8.09013	8.03045	7.66162	7.8721	7.93418	7.57126	7.46382	7.79635	7.75088	7.66502	7.68997	7.64887	7.52023	7.48067	7.66038	7.21465	7.68455	7.98452	7.46737	7.68272	7.78096	7.6437	7.88482	7.91699	7.46128
chr17	32879221	32891603	17343483	NM_207245 // Zfp870 // zinc finger protein 870 // 17 B1|17 // 240066 /// ENSMUST0000007	Zfp870	NM_207245	NM_207245 // RefSeq // Mus musculus zinc finger protein 870 (Zfp870), mRNA. // chr17 //		6.23712	6.49309	6.81502	6.52784	6.29341	6.52403	6.11452	6.46157	6.95862	6.36484	6.68462	6.52254	6.4689	6.14797	6.31836	6.83474	6.8208	6.34413	6.33296	6.2708	6.76528	6.53572	6.55208	6.96269	5.35074	5.98656	7.01588	6.1922	6.30111	6.94611	6.7198	6.64438	6.86837	7.22874	6.44044	6.91299	6.13453	6.46844	6.59922	5.9578	6.22002
chr17	22361453	22377281	17333999	NM_145484 // Zfp758 // zinc finger protein 758 // 17 A3.3|17 // 224598 /// ENSMUST00000	Zfp758	NM_145484	NM_145484 // RefSeq // Mus musculus zinc finger protein 758 (Zfp758), mRNA. // chr17 //		6.4926	6.0596	6.43852	6.57449	6.27917	6.28514	6.38108	6.0943	6.3751	6.07806	6.05113	6.90691	6.51886	6.34042	5.66919	6.68939	7.14041	5.90645	6.06938	6.35217	6.56694	6.26969	5.96606	6.33148	6.60425	6.2053	6.64907	6.2355	7.08909	6.58531	6.57788	6.02413	5.8148	7.1081	6.4907	6.77194	6.51898	6.42296	6.36196	6.04544	6.43658
chr17	30954679	31010710	17335742	NM_177465 // Umodl1 // uromodulin-like 1 // 17 A3.3|17 17.0 cM // 52020 /// ENSMUST0000	Umodl1	NM_177465	NM_177465 // RefSeq // Mus musculus uromodulin-like 1 (Umodl1), mRNA. // chr17 // 100 /		4.84609	5.002	4.81545	5.34224	5.15244	5.2877	5.06527	5.16873	4.7831	5.00805	5.19713	4.88938	5.14803	5.02063	5.13342	5.34872	4.91206	5.18736	5.36216	5.39332	5.28199	4.47695	5.31681	4.75941	5.18733	5.07196	5.26774	5.17477	5.00952	5.03502	5.08147	5.38034	4.66468	4.91531	5.60225	5.07416	5.21109	4.92866	4.91397	5.28961	4.90707
chr17	13534064	13534169	17341037	---		---	ENSMUST00000101867 // ENSEMBL // ncrna:snRNA chromosome:NCBIM37:17:13726930:13727035:-1		3.73946	4.98401	4.9377	5.08948	4.246	4.33762	4.517	3.67647	5.21094	4.52069	4.29643	4.38704	4.30852	5.16466	3.9715	5.63011	4.24892	4.46822	4.26035	4.94053	5.47729	5.3953	4.44677	5.05537	3.95364	4.55685	4.04631	4.22483	4.97488	4.44455	3.90564	4.71841	4.19484	5.04567	3.11734	4.73676	4.06819	3.3224	4.36011	3.83721	4.75697
chr17	24443779	24455311	17341856	NM_007893 // E4f1 // E4F transcription factor 1 // 17 A3.3|17 12.0 cM // 13560 /// ENSM	E4f1	NM_007893	NM_007893 // RefSeq // Mus musculus E4F transcription factor 1 (E4f1), mRNA. // chr17 /		7.95343	7.49843	7.46405	7.66563	7.56848	7.60868	7.48006	7.54355	7.92892	7.4931	7.48433	7.52853	7.76566	7.67191	8.55639	7.83033	8.08517	8.24549	7.61249	7.90786	7.83417	7.65706	7.41273	7.72029	7.57438	7.65914	7.82883	7.42184	7.60226	7.28397	7.69414	7.35246	7.70118	7.65313	7.43782	7.68152	7.81337	7.64766	7.63788	7.81061	7.94598
chr17	33199062	33200009	17336073	NM_207175 // Olfr239 // olfactory receptor 239 // 17 B1|17 // 100038860 /// ENSMUST0000	Olfr239	NM_207175	NM_207175 // RefSeq // Mus musculus olfactory receptor 239 (Olfr239), mRNA. // chr17 //		3.9004	3.59932	3.53388	3.94348	3.68173	3.86487	3.66079	3.63761	4.08647	4.24153	3.51388	3.4507	3.84097	3.75339	3.57923	3.38777	3.80344	3.37778	3.73964	3.66952	3.51215	3.61289	3.99431	3.85499	3.43793	3.30424	3.40551	3.60071	3.69278	3.67699	3.51392	3.57457	3.48702	3.54584	3.7799	3.84506	3.67447	4.16902	3.25611	3.85887	3.56562
chr17	35424850	35430055	17337122	NM_207648 // H2-Q6 // histocompatibility 2, Q region locus 6 // 17 B1|17 19.18 cM // 11	H2-Q6	NM_207648	NM_207648 // RefSeq // Mus musculus histocompatibility 2, Q region locus 6 (H2-Q6), mRN		9.5834	7.57646	8.69984	8.33963	8.62328	8.48029	7.27297	9.29384	10.5725	8.61964	8.20982	9.68033	8.12343	9.39838	10.7982	9.4548	8.21848	8.38151	8.32958	9.87915	11.6474	8.71465	8.53393	11.8264	7.8024	7.93953	8.49894	10.2459	9.38393	10.8832	7.8154	10.4968	8.4658	9.69662	6.04817	9.21702	7.47882	7.90119	7.18468	6.52621	6.82253
chr17	25773776	25783332	17334749	NM_026238 // Narfl // nuclear prelamin A recognition factor-like // 17 A3.3|17 // 67563	Narfl	NM_026238	NM_026238 // RefSeq // Mus musculus nuclear prelamin A recognition factor-like (Narfl),		8.14381	8.00738	7.91471	8.21599	7.68598	7.84864	7.86095	7.91548	7.76541	7.59646	7.91894	8.01054	7.78166	7.76042	7.92022	7.92753	8.35608	7.94468	7.88431	7.75788	7.68062	7.92534	7.83262	7.87962	7.59003	7.93178	7.76927	7.68246	7.82496	7.6937	7.58574	7.71427	7.88114	8.00383	7.35457	7.68916	7.66808	7.80217	7.73203	8.00944	7.79991
chr17	24896500	24897531	17334495	NM_019730 // Nme3 // NME/NM23 nucleoside diphosphate kinase 3 // 17 A3.3|17 // 79059 //	Nme3	NM_019730	NM_019730 // RefSeq // Mus musculus NME/NM23 nucleoside diphosphate kinase 3 (Nme3), mR		9.10468	8.28082	8.51216	8.89996	8.17023	8	8.3411	8.99954	8.90164	8.36434	8.22203	8.67153	7.94109	8.60382	7.78158	9.12773	8.89954	8.48346	8.4207	8.62515	8.78322	8.60541	8.33202	8.94999	8.85885	8.69736	8.68747	8.689	9.08376	8.95017	9.0737	7.98325	8.53936	8.83042	8.37117	9.00518	8.42198	8.32735	8.55083	8.12164	8.76928
chr17	29014642	29015897	17342993	---		---	ENSMUST00000137730 // ENSEMBL // cdna:putative chromosome:NCBIM37:17:29151587:29152842:		5.5275	5.28056	5.42395	5.2169	5.57097	5.24371	5.86858	6.54347	5.36863	5.95933	5.65417	5.77727	5.60649	5.67664	5.17789	5.58935	5.2483	5.34156	5.19241	5.60103	5.51108	5.45578	5.34186	5.75237	5.50815	5.67302	5.84508	5.44952	5.40858	6.06436	5.3998	5.51108	5.17936	5.4536	5.05792	5.73144	5.4371	5.57728	4.97908	5.28827	4.95958
chr17	9750752	9775866	17340752	NR_045433 // 4930452A19Rik // RIKEN cDNA 4930452A19 gene // 17|17 // 71092	4930452A19Rik	NR_045433	NR_045433 // RefSeq // Mus musculus RIKEN cDNA 4930452A19 gene (4930452A19Rik), non-cod		4.17881	4.21128	4.33865	3.83135	4.02062	4.58329	4.05218	4.11627	3.8407	4.18131	4.10351	4.35197	4.13645	4.22545	4.56989	4.3647	4.0382	4.4342	4.13798	4.06668	4.057	4.13802	4.24598	4.14642	3.9112	3.95858	4.10707	4.02223	3.90562	4.42889	4.45854	4.23171	4.02243	4.14699	4.06661	3.92219	4.15276	4.18138	4.07474	4.27549	4.12267
chr17	34728380	34743897	17343918	NM_009780 // C4b // complement component 4B (Chido blood group) // 17 B1|17 18.8 cM //	C4b	NM_009780	NM_009780 // RefSeq // Mus musculus complement component 4B (Chido blood group) (C4b),		8.54382	7.19932	6.42034	7.12359	9.54176	7.24261	7.28162	7.48973	8.16643	7.37283	6.47877	7.92681	6.77767	7.57085	8.29662	7.31871	6.49116	7.18163	7.57061	8.189	7.99401	6.26527	9.19947	6.93818	6.45276	7.04901	5.2516	8.90941	6.93476	8.52399	7.16782	7.13006	7.18911	8.61271	7.09303	6.70531	6.29815	6.07163	6.24405	6.65752	5.56165
chr17	33304591	33305591	17343557	---		---	ENSMUST00000170779 // ENSEMBL // cdna:known chromosome:NCBIM37:17:33441536:33442536:-1		9.57833	9.94768	9.76213	9.32194	9.41094	9.46909	9.86566	8.74417	8.91293	9.60592	9.79706	9.64592	9.58552	9.80662	9.01941	9.55537	9.71899	9.58515	9.66927	9.82854	9.33014	9.6335	9.46374	9.18715	9.87783	9.75945	9.90062	9.39747	9.65871	8.79636	9.69418	9.65599	9.87758	9.75762	9.83684	9.95637	9.6902	9.73792	9.7685	9.55297	9.7588
chr17	25985815	25988572	17334843	AK006250 // 1700022N22Rik // RIKEN cDNA 1700022N22 gene // 17 A3.3|17 // 69431 /// XR_1	1700022N22Rik	AK006250	AK006250 // GenBank HTC // Mus musculus adult male testis cDNA, RIKEN full-length enric		4.76677	4.78755	4.68077	4.33644	4.88024	4.95429	4.67657	5.2829	4.93151	5.02047	5.10503	4.9572	5.12086	5.02322	4.8471	4.81357	4.75835	4.78707	4.84499	4.85725	5.34465	4.72041	5.14423	5.37244	4.82172	4.81344	5.03677	4.84243	4.62593	5.32403	5.1719	4.69708	4.93927	4.63647	4.93666	4.68789	5.2489	4.85529	4.77745	5.08397	4.38336
chr17	22197265	22225614	17341399	NM_001205095 // Gm4944 // predicted gene 4944 // 17 A3.3|17 // 240038	Gm4944	NM_001205095	NM_001205095 // RefSeq // Mus musculus predicted gene 4944 (Gm4944), mRNA. // chr17 //		5.87847	6.00931	6.20473	5.70694	6.39397	5.98479	6.22807	6.168	6.55162	6.15248	5.55873	6.36199	6.00391	6.36663	5.05467	6.79707	7.03591	6.15049	6.53503	6.42808	6.83278	6.06775	6.54458	7.09769	6.61304	6.28434	6.63036	6.65943	6.36241	6.54944	6.35721	6.181	6.54549	6.42188	5.8398	6.40048	6.39723	6.35067	6.27298	6.28047	6.45063
chr17	6131836	6131944	17340522	NM_010240 // Ftl1 // ferritin light chain 1 // 7 B4|7 // 14325 /// NM_010240 // Ftl1 //	Ftl1	NM_010240	NM_010240 // RefSeq // Mus musculus ferritin light chain 1 (Ftl1), mRNA. // chr17 // 60		11.9159	11.9875	11.5626	11.9432	12.3905	11.8044	11.4921	11.7593	11.3548	11.6748	11.7873	11.9107	11.7229	11.4201	11.6545	11.7232	11.7223	11.4845	11.934	12.1214	11.5685	11.8336	11.7641	11.2659	11.5424	11.6505	11.5887	11.6294	11.6628	11.0852	11.6689	11.2407	11.9327	11.5429	11.2822	11.5644	11.3739	11.777	11.6116	11.4979	11.5366
chr17	24073680	24150924	17341690	NM_011062 // Pdpk1 // 3-phosphoinositide dependent protein kinase 1 // 17 A3.3|17 // 18	Pdpk1	NM_011062	NM_011062 // RefSeq // Mus musculus 3-phosphoinositide dependent protein kinase 1 (Pdpk		9.71919	9.75005	9.63412	9.71665	9.62671	9.86334	9.77149	9.82288	9.70191	9.72178	9.56653	10.1456	9.89114	9.79	9.63706	9.8899	10.2354	9.76469	9.68784	9.84814	9.99356	9.72902	9.61732	9.86712	9.97504	9.83377	9.72606	9.78888	9.69556	9.74302	10.0198	9.82271	9.71885	10.0953	9.66311	10.0893	9.83591	9.88136	9.81431	9.74185	10.107
chr17	34099929	34109826	17336403	XR_141828 // Gm19450 // predicted gene, 19450 // --- // 100502911 /// XR_141828 // Gm19	Gm19450	XR_141828	XR_141828 // RefSeq // PREDICTED: Mus musculus predicted gene, 19450 (Gm19450), miscRNA		5.70544	5.48287	5.95928	6.04213	5.60505	5.86175	5.91098	5.69009	5.87054	5.63137	6.23219	5.80504	5.943	5.70036	5.93099	5.43491	5.90567	5.80867	5.85738	5.63419	5.80345	5.91316	5.68771	5.75007	5.79921	5.77828	5.83479	5.83094	5.80946	5.55599	5.84919	6.19618	5.82756	5.74503	5.90342	5.84861	5.89505	5.85203	5.5031	5.92177	5.5675
chr17	12922790	12922917	17333344	NR_028479 // Snora20 // small nucleolar RNA, H/ACA box 20 // 17|17 // 100303746	Snora20	NR_028479	NR_028479 // RefSeq // Mus musculus small nucleolar RNA, H/ACA box 20 (Snora20), small		6.05081	7.28448	7.36996	7.9652	7.85414	7.00242	7.31197	6.30557	7.32657	7.60808	7.323	7.12507	7.40302	7.52041	9.05602	7.45313	7.74346	8.21936	7.60041	7.14559	7.11695	7.11253	7.22645	7.26229	7.18431	7.5119	7.83005	7.76637	7.27769	7.03143	7.59577	7.51848	8.00908	7.67239	6.82195	7.55487	7.8888	7.45334	7.9899	7.62971	7.36471
chr17	33629090	33631779	17336144	ENSMUST00000073570 // Zfp414 // zinc finger protein 414 // 17|17 B2 // 328801 /// NR_03	Zfp414	ENSMUST00000073570	ENSMUST00000073570 // ENSEMBL // cdna:known chromosome:NCBIM37:17:33766035:33768724:1 g		8.75412	9.01419	8.77359	8.82137	8.71604	8.48359	8.60952	8.34222	8.66297	8.71265	8.45511	9.00115	8.51782	8.77385	8.74584	9.06175	9.00951	9.18386	8.56864	8.84025	8.58035	8.70789	8.55502	8.79488	8.89467	8.92676	8.72572	8.61289	8.66181	8.50694	8.80046	8.9282	8.66169	8.92176	8.7085	8.89881	8.89933	8.91129	8.84976	9.09205	8.76831
chr17	35651828	35652311	17337219	---		---	ENSMUST00000173162 // ENSEMBL // havana:lincRNA chromosome:NCBIM37:17:35788773:35789256		4.56012	4.44767	4.42556	4.07666	4.34465	4.33393	4.28719	4.40664	4.22279	4.45252	4.47447	3.83566	4.38371	4.62463	3.97425	3.50581	4.41802	4.65344	4.13948	4.28664	4.26596	4.0662	4.56487	4.02449	4.43054	4.43852	4.28062	4.5343	4.21972	4.23107	3.81687	4.65161	4.21671	4.32674	4.36787	4.44029	4.87296	4.21312	4.2463	4.42429	3.97654
chr17	23736186	23740330	17341589	NM_023824 // Paqr4 // progestin and adipoQ receptor family member IV // 17 A3.3|17 // 7	Paqr4	NM_023824	NM_023824 // RefSeq // Mus musculus progestin and adipoQ receptor family member IV (Paq		8.34502	8.21615	8.49947	8.71592	8.30995	9.00756	8.59629	7.76593	8.75733	8.93754	8.76476	8.98724	8.58663	8.29312	7.74947	8.85391	9.20421	7.951	8.66108	8.92548	8.53045	8.75635	8.27449	8.87366	8.45717	8.31867	8.22488	8.45589	8.2098	8.53326	8.40062	7.87896	8.34651	8.58314	8.29135	8.73318	8.17627	8.69717	8.21306	8.2034	8.55109
chr17	24693191	24696156	17341987	NM_023040 // Gfer // growth factor, erv1 (S. cerevisiae)-like (augmenter of liver regen	Gfer	NM_023040	NM_023040 // RefSeq // Mus musculus growth factor, erv1 (S. cerevisiae)-like (augmenter		8.10289	7.86574	7.99656	8.46283	8.00702	7.79373	7.70511	7.76541	8.06308	7.92423	7.87243	7.88095	8.0065	7.81549	8.53906	8.0768	8.47922	7.96015	8.09049	7.984	8.17013	8.21966	7.70059	8.09141	7.63734	7.73861	7.93984	7.72043	8.13226	7.75462	7.76626	7.4764	8.1737	8.02111	7.67421	7.83328	7.69909	7.86154	8.0217	8.16398	7.8167
chr17	21313963	21314909	17333903	ENSMUST00000077301 // Vmn1r237 // vomeronasal 1 receptor 237 // 17 A3.2|17 // 171234 //	Vmn1r237	ENSMUST00000077301	ENSMUST00000077301 // ENSEMBL // cdna:known chromosome:NCBIM37:17:21450927:21451873:1 g		3.59163	3.52565	3.43092	3.97049	3.71353	3.51658	3.65592	3.73153	3.88077	3.24213	3.81347	3.52087	3.40449	3.65609	3.64949	3.53865	3.71922	3.52754	3.34759	3.28938	3.53253	3.51134	3.66941	3.40185	3.38259	3.43733	3.61541	3.5344	3.4766	4.08039	3.63092	3.71198	3.35197	3.55074	3.21108	3.83696	4.04825	3.49063	3.43421	3.57104	3.38688
chr17	23550799	23565294	17334059	AK031835 // 6330415G19Rik // RIKEN cDNA 6330415G19 gene // 17 A3.3|17 // 320020 /// XR_	6330415G19Rik	AK031835	AK031835 // GenBank HTC // Mus musculus adult male medulla oblongata cDNA, RIKEN full-l		6.16745	6.31393	6.39234	6.47007	5.78848	5.94254	6.06677	6.19465	6.36237	5.97557	5.97173	6.17787	6.08558	6.45549	5.53496	6.02022	6.66608	6.10064	6.18354	5.82268	5.80499	6.01471	5.97805	6.39899	6.22459	6.39747	6.26836	6.10152	5.98635	6.09482	6.00666	6.12394	6.18322	6.37646	5.78455	5.91962	5.96353	6.33749	6.40296	6.12937	5.85224
chr17	23993534	23998100	17341671	NM_133731 // Prss22 // protease, serine, 22 // 17 A3.3|17 10.7 cM // 70835 /// ENSMUST0	Prss22	NM_133731	NM_133731 // RefSeq // Mus musculus protease, serine, 22 (Prss22), mRNA. // chr17 // 10		6.89249	6.94887	6.7737	6.06294	7.02799	6.46767	6.51097	6.84316	6.77133	6.80082	6.81645	6.58652	6.76881	6.59902	6.816	6.1393	6.72025	6.68792	6.61306	6.52502	6.44417	6.4168	6.84051	6.60435	6.66121	6.53171	6.7923	6.61568	6.8306	6.58273	6.50769	6.42906	6.55919	6.83035	7.15237	6.56782	6.62276	6.82384	6.91164	6.89849	6.36262
chr17	13205042	13206211	17333373	NR_033458 // Gm10512 // predicted gene 10512 // 17 B1|17 // 100038394	Gm10512	NR_033458	NR_033458 // RefSeq // Mus musculus predicted gene 10512 (Gm10512), non-coding RNA. //		5.78225	6.03848	6.02238	5.88311	6.04036	6.12003	6.1628	5.90029	5.87748	6.02187	5.76374	6.23666	6.18902	5.92373	5.80638	6.17914	6.13562	5.79553	5.82433	5.9983	5.958	6.26155	5.67705	5.53117	5.98969	5.89204	6.09245	5.66773	6.34768	5.88749	6.30858	5.84526	6.06792	5.86121	6.0282	6.12841	6.0459	5.8729	6.02569	5.92941	6.23534
chr17	33746594	33747476	17547998	NM_008997 // Rab11b // RAB11B, member RAS oncogene family // 17 B1|17 18.3 cM // 19326	Rab11b	NM_008997	NM_008997 // RefSeq // Mus musculus RAB11B, member RAS oncogene family (Rab11b), mRNA.		7.08541	7.00758	7.25155	7.11864	6.81798	7.45325	7.06749	7.15859	7.05019	6.94411	7.72178	6.98649	8.22929	6.91933	6.91211	7.0764	7.37088	6.86933	7.55512	6.96129	7.20758	7.16166	7.19849	7.15114	6.66071	6.83885	7.41258	6.90214	7.10036	7.05739	7.11206	6.84591	7.55097	6.80029	7.12177	7.13878	7.17973	7.13306	7.08619	6.99088	6.93112
chr17	26542760	26543715	17334929	XM_003086049 // Gm8225 // predicted gene 8225 // 17 A3.3|17 // 666668 /// ENSMUST000000	Gm8225	XM_003086049	XM_003086049 // RefSeq // PREDICTED: Mus musculus predicted gene 8225 (Gm8225), mRNA. /		6.51581	5.82681	6.16982	5.77648	6.59828	6.48572	6.34069	6.59195	6.15954	6.51364	6.60098	6.01407	6.3979	6.28503	7.08968	5.92392	6.31885	6.40197	6.27925	6.40567	6.62853	6.4647	6.25471	6.37237	6.17946	6.14367	6.17903	6.19811	6.13818	6.17955	6.01866	6.12873	6.34721	6.30092	6.41881	6.41975	5.98625	6.36991	6.29177	6.29935	6.08344
chr17	33638056	33645706	17336157	NM_001002842 // Pram1 // PML-RAR alpha-regulated adaptor molecule 1 // 17 B1|17 // 3784	Pram1	NM_001002842	NM_001002842 // RefSeq // Mus musculus PML-RAR alpha-regulated adaptor molecule 1 (Pram		6.16334	5.70802	6.0346	5.86416	5.8856	5.82322	5.60641	5.64169	5.67246	5.70387	5.96619	5.7257	6.07438	5.67403	5.71171	5.85592	5.73192	6.67212	6.06958	5.64011	5.96846	5.79962	5.60233	5.99952	5.80884	5.80996	6.09544	5.71143	5.68475	5.8697	6.03161	5.78216	6.04898	5.62496	6.02744	5.73463	5.83509	5.87955	5.67576	5.8926	5.14894
chr17	32354050	32389439	17343405	NM_011717 // Wiz // widely-interspaced zinc finger motifs // 17|17 B2 // 22404 /// NR_0	Wiz	NM_011717	NM_011717 // RefSeq // Mus musculus widely-interspaced zinc finger motifs (Wiz), transc		7.84337	7.05704	7.05449	7.4479	7.34274	7.75054	7.28967	7.64014	7.59935	7.18729	7.29588	7.41264	7.42555	7.15647	7.83698	7.69238	7.49065	7.91861	7.2349	7.15057	7.41174	7.4015	7.44231	7.6509	7.24187	7.05882	6.89757	7.23204	7.1269	7.41252	7.11666	7.23533	6.95179	7.66309	7.17567	7.1431	7.33497	7.23246	7.1176	7.38885	7.82995
chr17	33843091	33849774	17336199	NM_019421 // Cd320 // CD320 antigen // 17 B1|17 18.0 cM // 54219 /// ENSMUST00000002379	Cd320	NM_019421	NM_019421 // RefSeq // Mus musculus CD320 antigen (Cd320), mRNA. // chr17 // 100 // 75		7.09207	6.84971	7.03769	7.73453	7.07643	6.81984	7.08322	7.12721	7.05201	6.90559	6.84808	7.1186	7.10202	6.88647	7.4481	7.26308	7.44573	6.28437	7.0618	7.14883	7.16604	7.09457	6.61799	7.15396	7.10426	6.95196	7.12771	6.84469	7.1003	6.95924	7.44543	6.97537	7.50704	7.18836	6.68708	7.33042	7.0353	7.30402	7.39466	7.25945	7.19054
chr17	15704967	15772612	17333589	NM_007690 // Chd1 // chromodomain helicase DNA binding protein 1 // 17 A2|17 7.2 cM //	Chd1	NM_007690	NM_007690 // RefSeq // Mus musculus chromodomain helicase DNA binding protein 1 (Chd1),		8.49179	8.67208	8.87855	8.78014	8.91486	8.77993	8.98073	8.84574	9.14924	9.30682	8.71646	9.01352	9.20728	8.9346	9.44685	9.07478	9.54462	9.03171	9.1943	9.07823	9.40458	8.99615	9.03243	9.06841	9.02416	8.99924	9.22558	8.96093	9.19777	9.08688	9.31358	8.78654	8.78724	9.44191	9.00414	9.36133	9.08555	8.88386	9.0457	8.85049	9.15326
chr17	32993129	33005457	17336042	NM_001045559 // Zfp952 // zinc finger protein 952 // 17 B1|17 // 240067 /// ENSMUST0000	Zfp952	NM_001045559	NM_001045559 // RefSeq // Mus musculus zinc finger protein 952 (Zfp952), mRNA. // chr17		7.47514	7.8678	7.75806	7.6345	7.64871	7.66103	7.68983	7.24546	7.6721	7.72309	7.97508	7.87448	7.92128	7.99842	7.31592	7.97148	8.55599	7.4181	7.69102	7.83338	7.65938	8.17663	7.499	7.29655	7.83261	7.84186	8.08931	7.70644	7.89062	7.9983	7.9487	7.81103	7.82887	8.42606	6.97468	7.97885	7.88119	8.19797	7.89804	7.57218	8.0811
chr17	24804382	24839787	17334433	NM_029197 // 4930528F23Rik // RIKEN cDNA 4930528F23 gene // 17 A3.3|17 // 75178 /// ENS	4930528F23Rik	NM_029197	NM_029197 // RefSeq // Mus musculus RIKEN cDNA 4930528F23 gene (4930528F23Rik), mRNA. /		3.47162	3.39224	3.21854	4.24702	3.46146	3.4155	3.40309	3.22762	3.32219	3.29678	3.36218	3.39554	3.38193	3.31172	3.46005	3.56403	3.31643	3.27163	3.66981	3.28118	2.83756	3.28188	3.05896	3.46659	3.2289	3.22847	3.42348	3.52491	3.63116	3.10393	3.73425	3.6332	3.51829	3.26153	3.23688	4.07346	3.50217	3.41049	3.32106	3.23468	3.44206
chr17	29090979	29100722	17335467	NM_007669 // Cdkn1a // cyclin-dependent kinase inhibitor 1A (P21) // 17 A3.3|17 15.23 c	Cdkn1a	NM_007669	NM_007669 // RefSeq // Mus musculus cyclin-dependent kinase inhibitor 1A (P21) (Cdkn1a)		9.79232	9.79323	10.1926	10.4325	9.99085	10.5518	9.55289	8.84805	9.29687	10.7256	10.2623	10.6699	10.231	10.2628	9.87228	9.92083	10.6838	9.82521	10.2151	9.65617	9.56241	9.97104	9.82557	9.24288	8.83918	9.47336	8.06465	9.65258	9.30588	8.74832	9.54138	10.1683	9.45901	9.73174	9.38579	9.43948	8.9909	9.34022	9.5333	9.68593	9.81483
chr17	25717171	25719406	17334716	ENSMUST00000048054 // Chtf18 // CTF18, chromosome transmission fidelity factor 18 // 17	Chtf18	ENSMUST00000048054	ENSMUST00000048054 // ENSEMBL // cdna:known chromosome:NCBIM37:17:25855871:25864364:-1		4.84554	5.08871	4.98408	4.71868	5.54106	5.16643	5.05246	4.84425	4.73438	5.46551	5.26643	4.97239	5.14841	4.7952	5.10586	4.79859	4.99055	4.92622	5.12638	4.96529	4.99819	4.9629	5.29991	4.81566	5.05144	4.86901	4.86065	4.79949	5.18199	4.99049	5.02112	4.95121	5.11387	4.81124	4.96021	4.88235	4.95418	4.89766	5.1275	5.11962	4.90589
chr17	24473884	24475469	17334266	BC119389 // 9930021D14Rik // RIKEN cDNA 9930021D14 gene // 17 A3.3|17 // 319259 /// BC1	9930021D14Rik	BC119389	BC119389 // GenBank // Mus musculus RIKEN cDNA 9930021D14 gene, mRNA (cDNA clone MGC:15		5.60841	5.52477	5.4957	5.99497	5.51917	5.39574	5.34299	5.67164	5.33815	5.763	6.06922	5.27911	5.75148	5.29289	5.94226	5.59863	5.66439	5.60897	5.51599	5.41822	5.29968	5.44764	5.51602	5.41946	5.28425	5.58041	5.49734	5.26515	5.39749	6.01486	5.45587	5.58478	5.76777	5.43877	5.40405	5.10499	5.41632	5.51111	5.56304	5.60018	5.36478
chr17	23675445	23677449	17341540	NM_013749 // Tnfrsf12a // tumor necrosis factor receptor superfamily, member 12a // 17	Tnfrsf12a	NM_013749	NM_013749 // RefSeq // Mus musculus tumor necrosis factor receptor superfamily, member		7.77983	7.3726	7.20563	7.12548	7.77954	7.39755	7.33638	7.18858	8.28109	7.4124	6.89985	7.76599	7.38023	7.02936	7.48926	7.58634	7.38483	7.44741	7.83919	7.52807	7.72431	6.94417	7.32816	7.94483	7.48749	7.55191	7.07662	7.33488	7.59128	7.16298	7.361	7.36842	7.76877	7.31425	6.94624	7.06728	7.15751	7.22724	8.52109	7.38556	7.04353
chr17	9147719	9168022	17340741	NR_027881 // 6530411M01Rik // RIKEN cDNA 6530411M01 gene // 17|17 // 67791	6530411M01Rik	NR_027881	NR_027881 // RefSeq // Mus musculus RIKEN cDNA 6530411M01 gene (6530411M01Rik), non-cod		4.14186	4.22023	4.30746	4.7917	4.53724	4.34145	4.35724	4.49962	4.14328	4.29586	4.47905	4.13712	4.42425	4.17437	4.38269	4.22317	4.24705	4.17467	4.31941	4.25834	4.39573	4.10889	4.2507	4.23982	3.94738	4.1052	4.38004	4.24434	4.09692	4.06418	4.34829	4.20108	4.39372	4.15417	4.09157	3.98884	4.15	4.09504	4.2037	4.19001	4.0868
chr17	33918127	33929825	17343672	NM_001025313 // Tapbp // TAP binding protein // 17 B1|17 18.41 cM // 21356 /// NM_00931	Tapbp	NM_001025313	NM_001025313 // RefSeq // Mus musculus TAP binding protein (Tapbp), transcript variant		6.26813	6.36399	6.34757	6.39473	6.38342	6.53937	6.35602	6.34901	6.14832	5.9727	6.45222	6.54058	6.49909	6.24933	6.70326	6.14733	6.72469	6.0487	6.41087	6.37626	6.09453	6.49445	6.08663	6.16651	6.1259	6.46561	6.52265	5.77267	6.29788	6.21355	6.36378	6.17124	6.26226	6.1914	6.40249	6.27573	6.1241	6.49779	6.1677	6.0499	6.2164
chr17	21535539	21562601	17333938	NM_144515 // Zfp52 // zinc finger protein 52 // 17 A3.2|17 9.9 cM // 22710 /// ENSMUST0	Zfp52	NM_144515	NM_144515 // RefSeq // Mus musculus zinc finger protein 52 (Zfp52), mRNA. // chr17 // 1		5.82709	6.48616	6.73124	5.6488	6.41731	5.52789	6.48239	6.49564	5.86872	6.64599	5.75154	6.67445	5.80353	7.13228	5.81166	6.47754	7.37278	6.54045	5.62373	6.87824	6.3875	6.53611	6.23937	5.66787	7.42105	6.80003	6.94189	7.18053	7.08897	5.6888	6.37856	6.99788	5.69882	7.14875	5.03638	6.49302	6.52808	6.28734	7.08034	6.69872	6.83385
chr17	33135588	33139683	17343542	ENSMUST00000131954 // Morc2b // microrchidia 2B // 17 B1|17 // 240069 /// NM_177719 //	Morc2b	ENSMUST00000131954	ENSMUST00000131954 // ENSEMBL // cdna:known chromosome:NCBIM37:17:33272588:33276444:-1		3.76238	3.78077	3.76251	4.1949	3.86668	3.90259	3.78718	3.66227	3.7117	3.49761	4.14217	3.92678	4.06028	3.77029	4.38368	4.06971	3.71034	4.08648	4.17393	3.99646	4.09306	3.67537	4.06817	3.64769	3.89033	3.88993	3.84531	3.72798	4.0121	3.89138	3.71649	3.91804	3.9797	3.92514	4.10045	4.24396	4.10908	4.0917	3.95004	3.89534	3.8242
chr17	35635752	35643695	17344349	NM_001033366 // Dpcr1 // diffuse panbronchiolitis critical region 1 (human) // 17 B1|17	Dpcr1	NM_001033366	NM_001033366 // RefSeq // Mus musculus diffuse panbronchiolitis critical region 1 (huma		5.37106	5.56427	5.41346	5.44586	5.53186	5.39534	5.49972	5.39614	5.41062	5.50166	5.4972	5.31205	5.25329	5.42247	5.42396	5.52962	5.35207	5.17497	5.19941	5.3391	5.31083	5.66549	5.32146	5.21728	5.26682	5.37621	5.46117	5.26667	5.19193	5.41222	5.52212	5.19888	5.41744	5.5533	5.41411	5.68758	5.37264	5.66984	5.43452	5.54469	5.54086
chr17	17345242	17346204	17341240	NR_027656 // Oaz1-ps // ornithine decarboxylase antizyme 1, pseudogene // 17 A3.2|17 //	Oaz1-ps	NR_027656	NR_027656 // RefSeq // Mus musculus ornithine decarboxylase antizyme 1, pseudogene (Oaz		11.9017	11.8898	11.9196	12.109	11.7139	11.8708	11.7114	11.7529	11.6519	11.8237	11.9614	11.917	11.6752	11.6561	11.5601	11.9812	11.8635	11.479	11.9256	11.7712	11.5623	11.862	11.8755	11.6568	11.4445	11.7867	11.7568	11.7679	11.6817	11.486	11.5619	11.4176	11.9301	11.5254	11.8369	11.5626	11.4625	12.2906	11.79	12.0048	11.5389
chr17	25942233	25944961	17342529	NM_001039038 // Nhlrc4 // NHL repeat containing 4 // 17 A3.3|17 // 621239 /// ENSMUST00	Nhlrc4	NM_001039038	NM_001039038 // RefSeq // Mus musculus NHL repeat containing 4 (Nhlrc4), mRNA. // chr17		4.68527	5.14217	4.72427	4.72051	4.98667	5.02165	5.00567	5.32942	4.48341	4.81133	4.68725	4.6907	4.85845	4.31177	4.7268	4.90625	4.80704	4.91843	4.90608	4.83526	4.68982	4.86573	4.93238	4.57982	4.6752	4.63953	4.76648	4.62507	4.79621	4.8337	4.72957	4.82698	4.59498	4.69621	4.9072	4.79433	4.78097	4.77348	4.62039	5.02373	4.58807
chr17	28925463	28937125	17335435	---		---	ENSMUST00000148464 // ENSEMBL // cdna:putative chromosome:NCBIM37:17:29062408:29074070:		6.4183	6.18801	6.41602	6.15893	6.49178	6.36694	6.36661	6.27223	6.27957	6.309	6.75279	6.35329	6.57806	6.4255	6.20459	5.85924	6.73768	6.087	6.18405	6.07387	6.18715	6.43794	6.22247	5.93197	6.45399	6.44351	6.40834	6.18355	6.55228	6.18599	6.3483	6.57216	6.65573	6.48084	6.15116	6.39143	6.16557	6.53079	6.38206	6.16244	6.36526
chr17	14101819	14106450	17341065	AK015649 // 4930488N24Rik // RIKEN cDNA 4930488N24 gene // 17 A2|17 // 75011 /// XM_619	4930488N24Rik	AK015649	AK015649 // GenBank HTC // Mus musculus adult male testis cDNA, RIKEN full-length enric		3.92044	3.82402	3.48057	3.74494	3.7495	3.8128	4.06806	3.55259	3.93277	3.58045	3.8768	3.38904	3.83782	3.69859	4.20727	3.98463	3.80647	3.93987	3.84709	3.57529	3.82301	3.67654	3.82815	3.78925	3.61746	3.82275	3.77152	3.61476	3.54078	4.35887	3.64121	3.91565	3.8545	4.00978	3.8308	3.71694	3.66406	3.8679	3.75151	3.81269	3.82156
chr17	13739995	13744047	17548016	AK157087 // LOC100505091 // uncharacterized LOC100505091 // --- // 100505091 /// XR_141	LOC100505091	AK157087	AK157087 // GenBank HTC // Mus musculus activated spleen cDNA, RIKEN full-length enrich		6.13021	5.97354	6.47499	5.98104	6.38587	6.29422	5.96361	5.86553	5.83911	5.62799	6.19399	6.24022	6.31329	6.35063	5.60891	6.25379	6.78524	6.16377	6.35638	6.05113	6.19212	6.45663	6.19066	5.92754	6.53377	5.65733	6.07565	6.25259	6.34447	5.50095	6.29667	6.47374	6.01878	6.25452	6.45043	5.85845	6.46481	5.91367	6.10151	6.04827	5.8811
chr17	35465455	35466482	17344334	---		---	ENSMUST00000174057 // ENSEMBL // havana:lincRNA chromosome:NCBIM37:17:35602400:35603427		4.00118	4.13603	4.06487	3.93535	4.17541	4.34351	4.29298	4.18939	3.90136	3.75833	4.19691	4.07334	4.30798	3.9548	3.89799	3.30058	4.44963	4.02206	4.06533	3.95253	3.93991	3.90332	4.1106	3.877	4.05073	4.13066	4.36304	4.11971	3.86452	4.01907	3.81083	4.15802	4.02387	4.25152	4.34158	4.11599	4.13817	3.99163	3.98384	4.07821	3.99019
chr17	25746788	25746879	17342338	---		---	ENSMUST00000102319 // ENSEMBL // ncrna:miRNA chromosome:NCBIM37:17:25883733:25883824:-1		5.61163	5.53181	5.87324	5.19131	5.86146	6.10196	6.07432	6.01788	5.34488	6.16667	5.96309	5.86102	5.94859	5.91632	5.55706	5.49712	5.81375	6.34954	6.14666	5.83134	6.34232	5.58507	5.92217	6.03545	5.8381	5.86043	5.59068	5.67735	5.73878	5.24599	5.959	5.90821	6.00939	5.79001	6.27388	5.61512	5.98176	5.31889	5.28745	6.29577	6.08222
chr17	35016579	35026741	17336874	NM_138582 // D17H6S56E-3 // DNA segment, Chr 17, human D6S56E 3 // 17 B1|17 19.0 cM //	D17H6S56E-3	NM_138582	NM_138582 // RefSeq // Mus musculus DNA segment, Chr 17, human D6S56E 3 (D17H6S56E-3),		5.91872	5.84946	5.61593	4.97829	5.766	5.8115	5.75594	5.69044	5.50385	5.69384	5.63582	6.01362	5.54066	5.57959	5.52661	5.41169	5.59965	5.66353	5.58948	5.5513	5.976	5.9417	5.65474	5.57614	5.36753	5.73519	5.43569	5.59418	5.63319	5.77261	5.3733	5.89501	5.37235	5.54934	5.42341	5.73912	5.32595	5.7285	5.66903	5.63392	5.15644
chr17	32905070	32917342	17343488	NM_001204335 // Cyp4f14 // cytochrome P450, family 4, subfamily f, polypeptide 14 // 17	Cyp4f14	NM_001204335	NM_001204335 // RefSeq // Mus musculus cytochrome P450, family 4, subfamily f, polypept		3.71398	3.9252	3.58729	3.4738	4.75268	4.08443	3.70272	3.91045	3.58034	3.61971	4.15675	4.09565	3.89208	3.70585	3.46231	3.49239	3.91313	3.91161	4.35845	3.66448	3.85427	3.96184	4.40609	3.68018	3.64795	3.64156	4.19282	3.62685	3.41954	3.74611	3.75123	3.61207	4.08431	3.57158	3.84152	3.95712	4.09596	3.83296	3.51346	4.20865	3.32806
chr17	35861318	35865402	17337269	NM_134122 // Nrm // nurim (nuclear envelope membrane protein) // 17 B1|17 // 106582 ///	Nrm	NM_134122	NM_134122 // RefSeq // Mus musculus nurim (nuclear envelope membrane protein) (Nrm), mR		9.19171	9.73654	9.65617	9.69988	9.19314	9.51741	9.56923	8.06826	9.12165	9.82611	9.61172	9.37442	9.36484	9.23386	8.62452	9.57473	9.37087	8.8165	9.22121	9.5223	9.38083	9.26294	9.41691	9.73969	9.6028	9.51038	9.37567	8.99886	9.26378	8.71441	9.52429	9.02879	9.48976	9.37721	9.16124	9.8717	9.2706	9.26679	9.41816	9.63611	9.10337
chr17	24895116	24896289	17334489	ENSMUST00000043907 // Mrps34 // mitochondrial ribosomal protein S34 // 17 A3.3|17 // 79	Mrps34	ENSMUST00000043907	ENSMUST00000043907 // ENSEMBL // cdna:known chromosome:NCBIM37:17:25032061:25033234:1 g		6.98754	7.11397	7.01396	7.21616	6.91553	7.03279	6.90746	7.12154	7.02845	7.10169	7.02985	6.92947	7.00313	6.69481	7.30107	7.28327	7.27283	7.05009	6.99403	6.77672	6.75243	7.15487	6.77695	6.97785	6.59335	6.77933	6.72369	6.6415	6.81619	7.09586	6.85945	6.62428	7.21645	6.78905	7.11858	6.99039	6.52286	6.91179	7.13949	7.08666	6.9546
chr17	22006323	22012198	17333995	ENSMUST00000174015 // Zfp943 // zinc finger prtoein 943 // 17 A3.3|17 // 74670	Zfp943	ENSMUST00000174015	ENSMUST00000174015 // ENSEMBL // cdna:known chromosome:NCBIM37:17:22099553:22208135:1 g		4.37145	4.36918	4.30476	3.76966	4.26707	3.83108	3.81948	3.99564	3.70272	4.09288	4.19296	3.81274	3.89764	4.85004	3.86612	4.24129	4.90332	3.74665	3.76076	4.42716	4.82285	4.07207	3.59369	4.17821	4.68007	4.22482	4.66749	3.66761	4.37126	4.39521	4.83208	3.85353	4.01008	5.10041	4.18832	4.78696	4.256	3.93722	4.1588	3.97383	4.4811
chr17	33064143	33068058	17343538	NM_001009544 // 4921501E09Rik // RIKEN cDNA 4921501E09 gene // 17 B1|17 // 74042 /// EN	4921501E09Rik	NM_001009544	NM_001009544 // RefSeq // Mus musculus RIKEN cDNA 4921501E09 gene (4921501E09Rik), mRNA		3.40511	3.59327	3.60691	3.65667	3.44371	3.57757	3.39452	3.39012	3.7253	3.68112	3.78744	3.36477	3.54593	3.49514	3.48896	3.21158	3.62175	3.54565	3.52514	3.46185	3.38877	3.24364	3.65869	3.47937	3.65247	3.45125	3.5057	3.38932	3.90151	3.33802	3.46969	3.53625	3.82872	3.57768	3.71196	3.81069	3.41002	3.30748	3.488	3.52265	3.36506
chr17	13051321	13052280	17340998	NM_001013832 // Gpr31b // G protein-coupled receptor 31, D17Leh66b region // 17 A1|17 7	Gpr31b	NM_001013832	NM_001013832 // RefSeq // Mus musculus G protein-coupled receptor 31, D17Leh66b region		6.74703	6.68542	6.71041	7.00786	7.28647	6.74694	6.53732	6.93059	6.96415	6.77	6.81538	7.39528	7.19011	6.86849	6.77044	6.46653	7.0484	7.31427	6.71331	8.12784	7.35679	6.71312	6.95379	7.09426	6.78981	6.76272	7.26037	6.5339	6.86391	6.9497	7.21249	6.78399	6.90782	7.03459	6.99078	6.55522	6.80046	6.76575	6.46449	6.70437	6.57337
chr17	7324646	7345974	17333001	ENSMUST00000128533 // Tcp10a // t-complex protein 10a // 17 A1|17 // 21461 /// ENSMUST0	Tcp10a	ENSMUST00000128533	ENSMUST00000128533 // ENSEMBL // cdna:known chromosome:NCBIM37:17:7529016:7549851:1 gen		4.77776	5.08134	4.92961	5.12641	5.35619	4.94426	5.00312	4.87585	4.64011	4.74167	4.76459	5.07127	5.27759	4.86592	4.76949	5.13167	5.03976	4.82015	4.86401	4.09716	4.7121	4.83371	4.8599	4.6525	4.7795	5.10072	5.1392	4.66877	5.12985	5.32945	5.07917	5.11686	4.99099	4.78075	5.32897	5.19195	4.98293	5.03873	5.04306	4.65258	5.20725
chr17	33908182	33909317	17343668	NR_045146 // BC051226 // cDNA sequence BC051226 // 17 B1|17 // 407803 /// BC051226 // B	BC051226	NR_045146	NR_045146 // RefSeq // Mus musculus cDNA sequence BC051226 (BC051226), non-coding RNA.		6.82013	6.88785	6.85347	6.59196	6.70491	6.86026	6.71274	6.98096	6.85879	6.86763	7.20104	6.83018	7.0113	6.78876	6.75239	6.61653	7.01809	6.91315	6.76817	6.74278	7.10577	6.80968	6.91583	6.98603	6.57105	6.8771	6.8238	6.64884	6.64715	6.9462	6.58822	6.68344	6.92044	6.63713	6.68279	6.87072	6.93344	6.94465	6.84266	6.80414	6.77042
chr17	24697949	24707660	17341993	ENSMUST00000126319 // Tbl3 // transducin (beta)-like 3 // 17 A3.3|17 // 213773 /// NM_1	Tbl3	ENSMUST00000126319	ENSMUST00000126319 // ENSEMBL // cdna:known chromosome:NCBIM37:17:24834894:24844605:-1		8.06901	8.52653	8.64747	8.6029	8.40376	8.56012	8.60878	8.18336	8.28759	8.5962	8.44846	8.69929	8.20488	8.4784	8.74487	8.79151	8.7631	8.51036	8.35056	8.48644	8.08741	8.61651	8.33783	8.33298	8.36284	8.58935	8.37038	7.86544	8.70482	7.87429	8.34838	8.18236	8.6388	8.76695	8.24597	8.30156	8.2573	8.55742	8.69683	8.52843	8.34542
chr17	35552128	35557180	17337197	NM_001008424 // Cdsn // corneodesmosin // 17 B1|17 // 386463 /// ENSMUST00000044804 //	Cdsn	NM_001008424	NM_001008424 // RefSeq // Mus musculus corneodesmosin (Cdsn), mRNA. // chr17 // 100 //		5.25172	5.49495	5.1785	5.28897	5.72712	5.66877	5.52601	5.61009	5.60411	5.87649	5.70257	5.53931	5.44919	5.24539	5.76843	5.49424	5.66428	5.77471	5.94879	5.54386	5.67546	5.59782	5.79044	5.48605	5.61589	5.66173	5.62845	5.36788	5.84148	5.50991	5.65005	5.47294	5.71629	5.21456	5.81183	5.3561	5.53729	5.55323	5.40682	5.73213	5.61439
chr17	35064437	35065596	17336918	NR_001462 // G6b // G6B protein // 17 B1|17 18.0 cM // 114763	G6b	NR_001462	NR_001462 // RefSeq // Mus musculus G6B protein (G6b), non-coding RNA. // chr17 // 100		5.47319	5.82796	5.18464	6.74178	5.65498	5.79631	5.78523	5.64186	5.26752	5.81905	6.35455	5.46186	5.92501	5.42106	5.5988	5.97558	5.46629	5.87392	5.3715	5.77096	5.59415	5.76133	5.6494	5.68519	5.72772	5.83885	5.66001	5.26896	5.81559	5.26266	5.57872	5.98054	6.2108	5.43434	6.0392	5.47862	5.79357	5.88923	5.91381	5.6786	5.68741
chr17	35028605	35046745	17344158	NM_013600 // Msh5 // mutS homolog 5 (E. coli) // 17 B1|17 18.9 cM // 17687 /// ENSMUST0	Msh5	NM_013600	NM_013600 // RefSeq // Mus musculus mutS homolog 5 (E. coli) (Msh5), transcript variant		5.94204	6.05359	6.11697	5.71706	6.1757	6.03453	6.08049	5.59372	6.80106	6.51441	6.01208	5.94853	6.26108	5.70621	6.46634	6.30126	5.66917	6.3742	6.15335	5.7597	6.45517	6.02166	6.0015	7.09923	5.98568	6.27309	6.46989	5.74596	5.9311	6.12829	5.97508	5.84107	6.23668	5.77368	6.72228	6.34566	6.03254	6.06712	6.40887	6.36535	5.80181
chr17	22286576	22314837	17341405	AK143064 // Gm7072 // predicted gene 7072 // 17 A3.3|17 // 631624 /// XR_033816 // Gm70	Gm7072	AK143064	AK143064 // GenBank HTC // Mus musculus 0 day neonate eyeball cDNA, RIKEN full-length e		8.0816	7.85012	8.19255	7.91569	8.12392	8.02867	8.34546	8.17894	8.42955	8.12716	7.79576	7.86343	7.75663	8.20048	7.81409	7.92773	8.76157	7.78404	7.87761	8.13918	8.31378	8.13679	7.87088	8.17398	7.94974	8.05888	8.26254	8.40971	8.39826	8.54584	8.24986	7.80748	7.96034	8.49075	6.79376	8.04812	8.06311	8.1799	8.27852	8.29731	8.31347
chr17	23898722	23900788	17334172	NM_001039238 // Dcpp2 // demilune cell and parotid protein 2 // 17 A3.3|17 // 630537 //	Dcpp2	NM_001039238	NM_001039238 // RefSeq // Mus musculus demilune cell and parotid protein 2 (Dcpp2), mRN		4.90293	4.76355	4.58665	4.80259	4.94934	4.36216	5.00937	4.66013	4.18857	4.78748	4.78947	4.82146	4.56767	4.89557	4.89198	6.04964	4.23346	5.09798	4.71574	5.20732	4.65937	4.64978	5.28549	4.47214	4.8697	4.80263	4.74464	4.6579	4.88431	4.42619	4.97386	5.36121	4.97086	4.53523	4.88355	5.10323	5.33851	5.48048	4.52863	5.26869	5.47158
chr17	25298394	25300161	17334638	NM_178372 // Prss34 // protease, serine, 34 // 17 A3.3|17 10.44 cM // 328780 /// ENSMUS	Prss34	NM_178372	NM_178372 // RefSeq // Mus musculus protease, serine, 34 (Prss34), mRNA. // chr17 // 10		5.02769	5.10393	4.87205	4.92917	5.18427	4.74118	5.00094	5.138	4.88531	5.07443	5.09249	5.1194	5.04011	4.8363	4.9536	5.08995	4.96015	4.84592	5.03366	5.06125	4.90234	5.07119	4.83694	4.79042	4.75342	4.97544	4.9433	4.72457	5.03166	4.81149	4.67751	5.04171	4.92245	4.8744	4.88071	4.76531	4.86957	4.93917	5.02196	5.14926	4.83698
chr17	15367354	15376872	17341179	ENSMUST00000014917 // Dll1 // delta-like 1 (Drosophila) // 17 A2|17 8.2 cM // 13388 ///	Dll1	ENSMUST00000014917	ENSMUST00000014917 // ENSEMBL // cdna:known chromosome:NCBIM37:17:15504318:15512940:-1		8.68298	5.81507	6.84068	6.54872	6.35343	7.05793	6.53319	6.14904	5.60436	6.04287	6.33397	7.00821	7.12838	6.55954	6.8629	7.15375	7.42566	8.34111	6.41349	6.07424	5.91458	6.33723	6.06192	5.92253	6.5959	6.03718	6.31285	6.01965	5.92968	6.20418	6.22411	5.44368	6.97874	7.54033	7.77437	6.69593	5.95636	7.01598	5.66153	5.44867	6.11942
chr17	26781079	26792521	17334970	NM_172149 // Bnip1 // BCL2/adenovirus E1B interacting protein 1 // 17 A3.3|17 // 224630	Bnip1	NM_172149	NM_172149 // RefSeq // Mus musculus BCL2/adenovirus E1B interacting protein 1 (Bnip1),		8.73814	9.12305	8.7065	9.23849	8.98206	8.55127	8.95194	8.1519	8.4491	8.9746	8.7772	8.99361	9.01122	8.78588	9.01147	8.79869	9.37464	8.90419	8.99153	8.8866	8.219	8.67001	8.45337	8.57073	8.69118	8.88011	8.89146	8.65586	9.01967	8.38332	8.83965	8.66285	9.12873	9.02973	8.44075	9.01989	8.98571	9.22535	9.26099	9.13279	8.77626
chr17	32956610	32956884	17343525	---		---	ENSMUST00000157701 // ENSEMBL // ncrna:misc_RNA chromosome:NCBIM37:17:33093555:33093829		3.88313	4.08672	4.3182	3.73828	4.33424	4.63282	3.90907	4.0431	4.54056	3.5839	4.47904	4.09843	4.24266	4.18921	3.94527	4.03436	3.93632	4.09109	4.13167	4.2767	4.26443	4.08059	4.27771	4.0907	3.90912	4.14921	4.23351	4.03479	4.35452	4.03021	4.05842	4.07637	4.12207	4.12176	4.42146	3.93825	4.56284	4.07324	4.13726	4.12632	4.42566
chr17	24719676	24719832	17342027	NR_028515 // Snora78 // small nucleolar RNA, H/ACA box 7 // 17 A3.3|17 // 100306952	Snora78	NR_028515	NR_028515 // RefSeq // Mus musculus small nucleolar RNA, H/ACA box 7 (Snora78), small n		6.12451	6.43948	6.88376	6.91905	6.69729	5.85199	6.4718	5.83423	6.58637	6.76381	6.52868	6.07304	6.52127	6.19994	6.90617	6.36904	6.71381	6.493	6.53519	6.6161	6.2993	6.39307	6.46491	6.66122	5.74304	6.49153	6.47818	6.14705	6.62943	6.05629	6.0658	6.24811	6.51163	6.45596	6.47147	6.20778	6.32769	6.33746	6.88071	6.63826	5.9021
chr17	31161396	31165053	17343176	NM_009362 // Tff1 // trefoil factor 1 // 17 A3.3|17 17.0 cM // 21784 /// ENSMUST0000002	Tff1	NM_009362	NM_009362 // RefSeq // Mus musculus trefoil factor 1 (Tff1), mRNA. // chr17 // 100 // 1		5.29114	6.07844	5.32305	5.45475	5.5465	5.85972	5.73302	5.55315	5.69586	5.90447	5.24773	5.63217	5.70444	5.49361	5.50273	5.86448	5.54157	5.45688	5.81848	5.33184	5.37579	5.48362	5.76217	5.72014	5.49749	5.64612	5.39118	5.42399	6.06586	5.01669	5.38549	5.61426	5.67937	5.69674	5.19794	5.70088	5.54444	5.58721	5.45489	5.43088	5.45286
chr17	34083843	34095309	17343762	NM_008206 // H2-Oa // histocompatibility 2, O region alpha locus // 17 B1|17 18.52 cM /	H2-Oa	NM_008206	NM_008206 // RefSeq // Mus musculus histocompatibility 2, O region alpha locus (H2-Oa),		4.24343	4.29893	4.38486	3.9951	4.50137	4.28774	4.2026	4.20206	4.15873	4.54686	4.30442	4.19434	4.71436	4.50196	4.70925	4.4114	4.23488	4.43022	4.54817	4.32287	4.29402	4.48294	4.53857	4.27797	4.37692	4.18799	4.39254	4.23288	4.14868	4.10305	4.15074	4.51379	4.57776	4.09956	4.71015	4.38186	4.34433	4.42061	4.18561	4.50066	3.97307
chr17	24549950	24596514	17334304	NM_013630 // Pkd1 // polycystic kidney disease 1 homolog // 17 A3.3|17 10.4 cM // 18763	Pkd1	NM_013630	NM_013630 // RefSeq // Mus musculus polycystic kidney disease 1 homolog (Pkd1), mRNA. /		8.5464	8.89934	8.48388	8.72544	8.97689	9.2031	8.61715	8.87389	8.66308	8.60367	9.02721	8.41725	8.90614	8.53032	9.64568	8.82126	8.86107	9.39634	8.8973	8.76659	8.67106	8.87149	8.83775	8.72601	8.74758	8.83441	8.33682	8.55558	8.48886	8.55922	8.4627	8.3919	8.65133	8.96173	8.96342	8.62673	8.80583	8.58391	8.82976	8.93758	8.75167
chr17	24961226	25015230	17342109	NM_020608 // Cramp1l // Crm, cramped-like (Drosophila) // 17 A3.3|17 // 57354 /// ENSMU	Cramp1l	NM_020608	NM_020608 // RefSeq // Mus musculus Crm, cramped-like (Drosophila) (Cramp1l), mRNA. //		8.96559	9.00558	9.06638	8.9495	8.85491	8.96783	8.86427	8.75679	8.95357	8.91406	8.9136	8.84414	9.21834	9.07501	9.49708	8.68998	9.2407	9.37992	8.77678	8.94202	8.98085	8.90964	8.74463	8.94663	8.99227	9.04074	8.85223	8.60928	8.75807	8.61067	8.78163	9.05009	8.86479	9.33682	8.70436	8.86589	8.83451	8.82768	8.87989	8.9647	9.10254
chr17	5448383	5483069	17340495	XR_141305 // Gm8363 // predicted gene 8363 // 17 A1|17 // 666919	Gm8363	XR_141305	XR_141305 // RefSeq // PREDICTED: Mus musculus predicted gene 8363 (Gm8363), miscRNA. /		5.21677	5.57626	5.2865	5.44698	4.79284	5.21895	5.58008	5.34453	5.11517	5.58724	5.95382	5.68507	5.55171	5.28848	5.86686	5.30582	5.52411	5.70818	5.2743	5.37549	5.40071	5.30071	5.41496	4.98239	4.88274	5.31229	5.52418	5.2726	5.44624	5.24061	5.68282	5.15288	5.54707	5.54893	5.60377	5.10412	5.26774	5.59079	5.16444	5.50118	5.22049
chr17	13007839	13018119	17333347	NM_013671 // Sod2 // superoxide dismutase 2, mitochondrial // 17 A1|17 7.6 cM // 20656	Sod2	NM_013671	NM_013671 // RefSeq // Mus musculus superoxide dismutase 2, mitochondrial (Sod2), nucle		10.6812	10.3785	10.3653	10.2905	10.2861	10.3601	10.2796	10.7284	10.5888	10.4977	10.1963	10.659	10.287	10.351	10.1793	10.6072	11.1893	10.3236	10.4719	10.301	10.4168	10.5396	10.5357	10.2206	10.409	10.4194	10.2522	10.4841	10.3516	10.5745	10.2703	10.2164	10.5889	10.6779	10.577	10.429	10.2703	10.5363	10.411	10.6251	10.6295
chr17	14947736	14948823	17341148	NR_027905 // LOC106740 // uncharacterized LOC106740 // 17|17 // 106740 /// ENSMUST00000	LOC106740	NR_027905	NR_027905 // RefSeq // Mus musculus uncharacterized LOC106740 (LOC106740), non-coding R		7.90145	8.57419	9.0893	7.67557	9.11605	8.17207	8.86145	7.75432	8.36597	8.7721	8.25827	9.21309	8.76039	9.08639	6.83934	8.39898	9.53648	8.32222	8.93041	8.53351	8.39623	9.08813	8.91482	8.29242	9.16559	8.77679	9.26968	9.17734	8.91033	9.06769	9.0215	8.84252	8.68162	9.75897	9.67409	9.06376	9.37505	8.43407	9.02451	9.20161	9.40061
chr17	7350904	7352696	17340654	NM_001098267 // Ttll2 // tubulin tyrosine ligase-like family, member 2 // 17 A1|17 // 1	Ttll2	NM_001098267	NM_001098267 // RefSeq // Mus musculus tubulin tyrosine ligase-like family, member 2 (T		4.23822	3.97837	4.3774	4.42199	4.15873	4.48234	4.67442	4.46772	4.26742	4.66307	4.26482	4.64948	4.48563	4.50331	4.60524	4.43802	4.67705	3.94695	4.27654	4.66137	4.66848	4.3016	4.85472	4.5727	4.64463	4.6544	4.69252	4.70349	4.17421	5.20001	4.65904	4.58617	4.32122	4.44912	4.33783	4.51742	4.48125	4.92478	4.04463	4.43801	4.45057
chr17	32965814	32979233	17336036	NM_153063 // Zfp472 // zinc finger protein 472 // 17 B1|17 // 224691 /// ENSMUST0000003	Zfp472	NM_153063	NM_153063 // RefSeq // Mus musculus zinc finger protein 472 (Zfp472), mRNA. // chr17 //		6.61868	6.95256	6.73571	6.32703	6.77281	6.59305	6.90422	6.19154	6.98369	6.8868	6.67427	6.26341	6.87013	6.62644	7.55767	6.74706	6.95602	7.01368	6.7335	7.33326	6.88887	6.86321	6.42557	6.9905	6.65734	6.78833	6.6216	6.78093	7.16687	6.46248	6.71464	6.6961	6.82591	6.85932	6.402	6.91206	6.4031	6.66062	7.18908	7.15496	6.84661
chr17	30592861	30612659	17343143	NM_025374 // Glo1 // glyoxalase 1 // 17 A3.3|17 16.0 cM // 109801 /// ENSMUST0000002482	Glo1	NM_025374	NM_025374 // RefSeq // Mus musculus glyoxalase 1 (Glo1), transcript variant 1, mRNA. //		8.65751	8.18023	8.13627	7.73005	7.42275	7.86335	8.14922	8.27973	8.71373	7.71174	7.97686	8.03795	8.04629	8.12603	7.62934	8.31223	8.66267	7.65103	7.97507	7.8326	8.37087	8.0115	7.84008	8.37472	8.16311	7.66035	8.25692	7.98671	7.80246	8.32376	8.36184	7.69049	8.50381	8.51588	8.34177	8.37787	8.09684	8.46632	8.32254	7.52866	8.1366
chr17	29578816	29596305	17343070	NR_045447 // 0610038L08Rik // RIKEN cDNA 0610038L08 gene // 17 A3.3|17 // 74092	0610038L08Rik	NR_045447	NR_045447 // RefSeq // Mus musculus RIKEN cDNA 0610038L08 gene (0610038L08Rik), non-cod		5.36175	5.59879	5.46776	5.47265	5.36826	5.52887	5.66213	5.6279	5.55899	5.67795	5.71919	5.35042	6.11066	5.49801	5.29283	5.40014	5.87662	5.65048	5.53794	5.03217	5.62428	5.49805	5.52943	5.40062	5.53809	5.4089	5.47383	5.32963	5.67493	5.06285	5.65134	5.52297	5.74392	5.52368	5.68789	5.62075	5.72584	5.67407	5.37536	5.53764	5.25847
chr17	27839974	27851968	17335168	ENSMUST00000071006 // Snrpc // U1 small nuclear ribonucleoprotein C // 17|17 B1 // 2063	Snrpc	ENSMUST00000071006	ENSMUST00000071006 // ENSEMBL // cdna:known chromosome:NCBIM37:17:27976919:27988909:1 g		8.57422	8.52867	8.72183	8.4033	8.58385	8.27152	8.39099	8.64066	8.17871	8.38822	8.60782	8.51743	8.57159	8.64852	8.21493	8.08769	8.76548	8.65938	8.53996	8.54913	8.24833	8.57937	8.34336	8.29669	8.39198	8.35058	8.73476	8.42991	8.42602	8.13089	8.61152	8.18505	8.81668	8.55327	8.91768	8.53723	8.54306	8.75616	8.81643	8.85751	8.54832
chr17	34112019	34122607	17343768	NR_037970 // Brd2 // bromodomain containing 2 // 17 B1|17 18.53 cM // 14312 /// NM_0102	Brd2	NR_037970	NR_037970 // RefSeq // Mus musculus bromodomain containing 2 (Brd2), transcript variant		9.319	9.26353	9.35414	9.35596	9.26718	9.31075	9.39562	9.21927	9.09093	9.46077	8.69177	9.40054	9.43	9.39397	9.61143	9.43735	9.76791	9.34401	9.32306	9.35638	9.24584	9.17959	9.2513	9.21637	9.42969	9.44133	9.2186	9.1751	9.11733	9.02723	9.31381	9.3279	9.3938	9.72291	9.45875	9.3325	9.30985	9.44081	9.17807	9.33145	9.41816
chr17	28177339	28205886	17335262	NM_172617 // Zfp523 // zinc finger protein 523 // 17 A3.3|17 // 224656 /// ENSMUST00000	Zfp523	NM_172617	NM_172617 // RefSeq // Mus musculus zinc finger protein 523 (Zfp523), mRNA. // chr17 //		7.97418	7.57682	7.36317	7.51315	7.29616	7.7473	7.40794	7.47298	7.57203	7.39867	7.50758	7.67265	7.49218	7.49816	7.8633	7.85907	7.73241	7.73713	7.41472	7.22325	7.60171	7.35713	7.38693	7.90035	7.50048	7.44729	7.21721	7.25953	7.28645	7.45998	7.37562	7.45712	7.51505	7.60254	7.7751	7.58074	7.83092	7.7873	7.22005	7.38183	7.61659
chr17	26715650	26776635	17334956	NM_029870 // A930001N09Rik // RIKEN cDNA A930001N09 gene // 17|17 B1 // 77128 /// ENSMU	A930001N09Rik	NM_029870	NM_029870 // RefSeq // Mus musculus RIKEN cDNA A930001N09 gene (A930001N09Rik), mRNA. /		7.93112	8.90469	9.01391	8.68332	8.8929	8.80877	8.91284	8.58941	8.83971	8.91555	9.18158	8.64807	9.0406	8.56692	9.42526	8.27337	9.04056	8.61807	9.26879	9.06046	9.04118	8.57521	9.00324	9.01528	8.72447	8.75862	9.03031	9.22887	8.70037	9.09743	9.20321	8.86319	9.27119	8.88317	8.90582	8.80909	8.39207	8.88021	8.58941	9.06164	8.62312
chr17	25471590	25476594	17334685	NM_027951 // Tekt4 // tektin 4 // 17 A3.3|17 // 71840 /// ENSMUST00000025002 // Tekt4 /	Tekt4	NM_027951	NM_027951 // RefSeq // Mus musculus tektin 4 (Tekt4), mRNA. // chr17 // 100 // 100 // 2		4.61608	4.79105	4.6684	4.95616	4.66295	5.23263	4.95867	4.65329	4.75769	5.14454	4.75842	4.85552	4.74176	4.74984	5.35276	4.67789	4.71702	4.88011	4.68383	4.39366	4.66154	4.44846	4.7014	4.63749	4.5669	4.72622	4.34984	4.6039	5.35493	4.47484	4.65679	4.84747	4.74145	4.77027	4.51663	4.50353	4.68767	4.73528	4.56845	4.61705	4.6163
chr17	22929388	22932941	17341451	AB540949 // Vmn2r113 // vomeronasal 2, receptor 113 // 17 A3.3|17 // 434701 /// AB54094	Vmn2r113	AB540949	AB540949 // GenBank // Mus musculus domesticus V2Rp7 mRNA for vomeronasal 2 receptor p7		3.50662	3.65968	3.47853	3.98696	3.75978	3.62261	3.66823	3.43709	3.81663	3.57781	3.91255	3.74486	3.7095	3.62697	3.62048	3.87415	3.49886	3.64425	3.58349	3.58197	3.6976	3.62716	3.60527	3.57386	3.71128	3.40123	3.5258	3.53296	3.8569	3.77217	3.92833	3.87179	3.67968	3.45937	3.99516	3.86511	3.83909	3.85747	3.56577	3.74879	3.81341
chr17	35821684	35822923	17337228	NM_133662 // Ier3 // immediate early response 3 // 17 B1|17 // 15937 /// ENSMUST0000000	Ier3	NM_133662	NM_133662 // RefSeq // Mus musculus immediate early response 3 (Ier3), mRNA. // chr17 /		7.46467	8.00606	7.35939	7.78044	8.55722	7.75636	7.51846	7.91735	9.5417	8.63639	7.87426	7.37886	7.89387	7.12192	9.04117	6.49542	7.99827	7.01116	8.47814	8.31309	8.02571	8.28287	8.72847	7.99433	6.66021	7.80013	6.13981	7.84186	7.56163	7.91286	7.34797	7.21375	8.01261	7.57771	6.49482	7.21793	6.30823	7.03687	7.20212	7.03264	6.97662
chr17	25343245	25345562	17342238	NM_031187 // Tpsab1 // tryptase alpha/beta 1 // 17 A3.3|17 10.4 cM // 100503895 /// ENS	Tpsab1	NM_031187	NM_031187 // RefSeq // Mus musculus tryptase alpha/beta 1 (Tpsab1), transcript variant		4.53507	4.93076	4.67869	5.42522	4.56627	4.72618	4.70937	4.48871	4.69208	4.75431	4.90666	4.58475	4.75743	4.78365	4.75997	5.324	4.62968	4.66921	4.51733	4.63554	4.44987	4.84483	4.59517	4.50798	4.69484	4.63182	4.80002	4.87721	4.91327	4.73902	4.8188	4.66075	4.69763	5.08917	4.7339	4.88982	4.86851	4.86168	4.95837	4.58583	4.94711
chr17	34969199	34972156	17344132	ENSMUST00000087328 // Hspa1a // heat shock protein 1A // 17 B1|17 18.95 cM // 193740 //	Hspa1a	ENSMUST00000087328	ENSMUST00000087328 // ENSEMBL // cdna:known chromosome:NCBIM37:17:35106144:35109069:-1		7.33826	6.73045	6.91649	6.9339	8.71385	6.83508	6.7792	7.60287	7.5989	6.81105	7.12055	7.33521	7.67498	6.62366	8.19333	5.62989	6.05981	6.25998	8.34584	10.0436	10.5988	7.83732	7.53889	7.15025	7.16246	6.24571	6.56031	6.664	6.53396	7.73166	7.79216	6.19308	7.23892	6.71119	6.75223	8.12293	6.30958	5.87053	7.10892	6.67253	6.21148
chr17	13675662	13683516	17341039	---		---	AK143195 // GenBank HTC // Mus musculus 0 day neonate eyeball cDNA, RIKEN full-length e		6.00163	6.04555	6.37504	5.75196	6.34826	6.28818	5.95707	5.96486	6.11904	5.97576	6.42603	5.91556	6.24286	5.99239	6.01675	5.83976	6.01677	6.335	6.01642	6.29457	6.11227	6.18833	6.38074	5.8638	5.97249	6.03592	6.17806	5.90364	6.06677	6.22927	5.82309	6.59895	6.09633	5.79235	6.13042	6.13014	5.94055	6.03805	6.04488	6.16131	5.81881
chr17	15631788	15641102	17333584	NR_045431 // 4933401D09Rik // RIKEN cDNA 4933401D09 gene // 17|17 // 71008 /// NR_04543	4933401D09Rik	NR_045431	NR_045431 // RefSeq // Mus musculus RIKEN cDNA 4933401D09 gene (4933401D09Rik), non-cod		4.33608	4.08681	4.26091	4.73342	4.19231	4.03241	4.32572	3.85742	4.05717	4.61605	4.40088	4.15108	4.53565	4.22681	4.16691	4.33488	4.27155	4.51542	4.19118	4.23251	4.05017	4.13567	3.96983	4.0201	4.37702	4.40925	4.21184	3.82976	4.14176	3.77347	4.16309	4.51476	4.18652	4.013	4.04862	4.18779	4.2974	4.16174	4.1018	4.21747	4.35058
chr17	31207873	31242403	17335798	ENSMUST00000048656 // Ubash3a // ubiquitin associated and SH3 domain containing, A // 1	Ubash3a	ENSMUST00000048656	ENSMUST00000048656 // ENSEMBL // cdna:known chromosome:NCBIM37:17:31344818:31379147:1 g		4.01634	3.77592	3.80645	4.36894	3.6992	3.87722	4.16004	4.22727	4.12477	3.91346	3.95469	3.76061	3.93187	4.31175	4.15264	3.84377	4.10442	4.16143	4.10438	3.65136	4.21034	3.79727	4.06863	4.43037	3.78393	4.02809	4.04785	3.8919	3.87543	3.78765	3.9793	4.17696	4.12667	4.04632	5.39462	3.8944	4.05941	3.8673	3.78359	4.35056	3.84145
chr17	24163866	24169702	17341731	NM_009729 // Atp6v0c // ATPase, H+ transporting, lysosomal V0 subunit C // 17 A3.3|17 /	Atp6v0c	NM_009729	NM_009729 // RefSeq // Mus musculus ATPase, H+ transporting, lysosomal V0 subunit C (At		6.51396	6.66732	6.52868	7.31418	6.35297	6.78644	6.8271	6.61948	6.64785	6.53129	6.51882	6.39322	6.52374	6.55278	6.40623	6.58497	6.838	6.37512	6.48247	6.71048	6.68041	6.6921	6.82043	6.58289	6.72435	6.75942	6.5946	6.47317	6.28521	6.64376	6.57402	6.63513	6.47674	6.60892	6.7123	7.2169	6.78446	6.66413	6.45049	6.54644	6.24752
chr17	26973167	26976395	17335040	ENSMUST00000133257 // Ggnbp1 // gametogenetin binding protein 1 // 17 A3.3|17 // 70772	Ggnbp1	ENSMUST00000133257	ENSMUST00000133257 // ENSEMBL // cdna:known chromosome:NCBIM37:17:27110162:27173323:1 g		8.54137	8.72664	8.56584	8.73255	8.53074	8.54516	8.637	8.45702	8.32625	8.44508	8.47204	8.50535	8.46802	8.59011	8.30762	8.69918	9.04966	8.98987	8.51918	8.59225	8.55593	8.30212	8.58294	8.4296	8.58404	8.51302	8.7846	8.4631	8.22108	8.39952	8.66053	8.64383	8.66573	8.94775	8.5019	8.66446	8.60684	8.76537	8.52078	8.9093	8.56563
chr17	19504811	19532060	17333805	NM_001104562 // Vmn2r100 // vomeronasal 2, receptor 100 // 17 A3.2|17 // 627537 /// ENS	Vmn2r100	NM_001104562	NM_001104562 // RefSeq // Mus musculus vomeronasal 2, receptor 100 (Vmn2r100), mRNA. //		3.61118	3.38072	3.52178	2.87537	3.38775	3.00322	3.39289	4.23215	3.23617	3.54751	3.13298	3.18739	3.06303	3.43397	4.56843	3.21259	3.58374	3.53588	3.64976	3.01063	3.57101	3.10342	3.58985	4.46054	3.58659	3.38813	3.77345	3.79444	3.01648	3.32778	3.27117	3.45847	2.98097	3.39331	3.68515	3.23303	3.10306	3.67404	3.37482	3.80684	2.95485
chr17	33981492	33985358	17336316	NR_033305 // AA388235 // expressed sequence AA388235 // 17 B1|17 // 433100 /// NR_03330	AA388235	NR_033305	NR_033305 // RefSeq // Mus musculus expressed sequence AA388235 (AA388235), non-coding		6.54763	6.73199	7.73433	6.2624	6.24053	6.72482	6.71042	5.71028	6.06534	6.41386	6.62526	5.26015	6.49033	6.82503	6.53389	4.94619	6.78447	6.64262	6.41096	7.57664	5.32482	7.26536	6.47326	6.16478	5.10511	7.02608	5.44345	5.31483	7.2834	5.72996	4.93912	6.81753	6.4766	6.69738	5.43634	6.95024	5.15491	5.59541	7.14198	7.04368	7.88373
chr17	14944994	14992856	17341132	NM_024250 // Phf10 // PHD finger protein 10 // 17|17 A2 // 72057 /// ENSMUST00000024657	Phf10	NM_024250	NM_024250 // RefSeq // Mus musculus PHD finger protein 10 (Phf10), mRNA. // chr17 // 10		8.89078	8.95909	9.05485	9.07033	9.64511	8.85766	9.02771	9.01839	9.18535	9.00991	8.77415	9.55096	9.22048	9.15142	8.97353	8.96042	10.1131	9.13384	9.34195	9.43899	9.20824	9.37971	8.88817	9.28087	9.18929	9.08641	9.32599	8.9183	9.06834	9.02769	9.32423	8.77546	9.31651	9.74217	8.79012	9.60084	9.24173	9.13247	9.50076	9.43535	9.47977
chr17	20502299	20503195	17333842	NM_134194 // Vmn1r225 // vomeronasal 1 receptor 225 // 17 A3.2|17 // 171228 /// ENSMUST	Vmn1r225	NM_134194	NM_134194 // RefSeq // Mus musculus vomeronasal 1 receptor 225 (Vmn1r225), mRNA. // chr		4.38542	4.049	4.02744	4.49571	4.23994	4.4035	4.12889	4.3036	3.84494	3.82914	4.40159	4.40876	3.98306	4.38033	3.727	4.59175	4.4828	3.94165	3.99897	3.87232	3.97406	3.80761	4.42799	4.07139	4.01394	3.93124	4.1122	3.85877	3.82288	3.67075	4.13261	4.43128	4.49391	4.12659	4.33034	3.70706	4.35704	3.99784	4.08619	4.04228	3.82161
chr17	12841005	12868143	17340902	NM_008552 // Mas1 // MAS1 oncogene // 17 A1|17 7.45 cM // 17171 /// ENSMUST00000089015	Mas1	NM_008552	NM_008552 // RefSeq // Mus musculus MAS1 oncogene (Mas1), mRNA. // chr17 // 100 // 91 /		4.35311	4.38483	4.23443	4.44965	4.24775	4.34893	4.39476	4.35464	4.30609	4.50736	4.45422	4.0454	4.02979	4.50495	4.42927	4.49255	4.39692	4.48662	4.07419	4.3742	3.82252	4.25625	3.98585	4.25823	4.26346	4.35822	4.34832	4.19525	4.29443	4.01068	4.53138	4.46318	4.16242	4.23577	4.2736	4.29786	4.4547	4.27152	4.27895	4.18676	4.10239
chr17	33974659	33978791	17343703	NR_004446 // H2-K2 // histocompatibility 2, K region locus 2 // 17 B1|17 17.98 cM // 63	H2-K2	NR_004446	NR_004446 // RefSeq // Mus musculus histocompatibility 2, K region locus 2 (H2-K2), non		8.46802	8.12427	8.49345	8.61504	8.26425	8.76512	8.23012	8.43817	8.7283	8.69748	9.11765	8.29478	8.50782	8.57043	9.09419	7.83961	8.34945	8.66732	8.47399	8.59759	8.7183	8.2361	8.22528	8.5022	8.07814	8.54496	8.29592	8.09852	8.54882	8.88783	7.82281	8.6202	8.34632	8.32946	7.69245	8.6123	7.81607	8.15798	8.47479	8.45862	7.84576
chr17	24047720	24073485	17341681	NM_027008 // Kctd5 // potassium channel tetramerisation domain containing 5 // 17 A3.3|	Kctd5	NM_027008	NM_027008 // RefSeq // Mus musculus potassium channel tetramerisation domain containing		9.34978	9.994	9.82766	9.96156	9.43025	9.73321	9.88	8.87142	9.57419	9.7175	9.85614	9.63353	9.93114	9.55608	8.92482	10.0642	10.0971	9.34465	9.81871	9.62202	9.49079	9.82538	9.42709	9.66373	9.57126	9.45686	9.74559	9.05657	9.74561	9.26524	9.77887	9.59139	9.9431	10.042	9.64788	9.85076	9.62408	9.76508	9.69707	9.62817	9.61274
chr17	25694114	25694220	17342306	---		---	ENSMUST00000082746 // ENSEMBL // ncrna:snRNA chromosome:NCBIM37:17:25831059:25831165:-1		5.1876	4.98368	6.19721	4.5377	5.44157	5.06024	5.36856	4.81618	4.90522	6.03634	4.73934	4.79039	4.83363	5.73845	4.02907	4.2382	5.31702	4.38119	4.44383	5.23717	6.28265	4.65381	4.96099	5.50743	5.47187	5.34268	6.04971	5.48057	6.09908	5.30476	5.10031	5.17947	5.48297	5.88864	5.60475	5.8659	5.72287	4.87477	6.04932	5.46877	5.29954
chr17	15375000	15379475	17333549	ENSMUST00000143460 // Dll1 // delta-like 1 (Drosophila) // 17 A2|17 8.2 cM // 13388	Dll1	ENSMUST00000143460	ENSMUST00000143460 // ENSEMBL // cdna:known chromosome:NCBIM37:17:15511758:15513836:-1		5.47996	5.47418	5.71808	5.2264	5.59624	5.75304	5.63673	5.5187	5.15784	5.34653	5.69734	5.64572	5.62273	5.41239	5.6904	5.56402	5.50191	5.81065	5.22072	5.35689	5.17282	5.57428	5.46211	5.4078	5.3485	5.18837	5.39702	5.37784	5.25988	5.32945	5.54199	5.51774	5.61231	5.36971	5.90133	5.65457	5.37163	5.57113	5.14407	5.55198	5.47589
chr17	25736040	25748330	17334730	NM_177822 // Mslnl // mesothelin-like // 17 A3.3|17 // 328783 /// ENSMUST00000047098 //	Mslnl	NM_177822	NM_177822 // RefSeq // Mus musculus mesothelin-like (Mslnl), mRNA. // chr17 // 100 // 1		5.8098	5.84475	5.86848	6.00699	5.72411	5.87356	5.87485	5.82479	5.42272	5.71462	5.97134	5.8779	5.60932	5.75081	5.66943	5.94752	6.14748	5.94815	5.87239	5.73015	5.74138	5.86374	5.77624	5.68675	5.88453	5.94315	5.78589	5.86443	5.75069	5.7237	5.79058	5.72792	5.79122	5.96529	5.97218	5.61712	5.99042	5.6973	5.75377	5.85604	5.55401
chr17	34976899	34981788	17344137	NM_013558 // Hspa1l // heat shock protein 1-like // 17 B1|17 18.95 cM // 15482 /// ENSM	Hspa1l	NM_013558	NM_013558 // RefSeq // Mus musculus heat shock protein 1-like (Hspa1l), mRNA. // chr17		6.07234	6.02422	6.82236	6.59194	6.06684	5.73693	6.3283	4.92685	5.86603	6.04591	5.76527	6.09792	5.97644	6.64502	5.92842	6.60659	6.91073	6.53438	5.94056	6.1695	5.52285	6.37532	5.36602	5.85137	6.82435	6.06065	6.64214	6.10196	6.63342	5.67204	6.16885	6.09449	6.57578	6.69571	6.06769	6.78586	6.22925	5.84749	6.67767	6.55175	6.56804
chr17	35266768	35267368	17548030	AF118128 // Ddx39b // DEAD (Asp-Glu-Ala-Asp) box polypeptide 39B // 17 B1|17 19.12 cM /	Ddx39b	AF118128	XR_140419 // RefSeq // PREDICTED: Mus musculus uncharacterized LOC100862184 (LOC1008621		5.0243	4.83476	4.90275	5.33423	4.84501	5.61977	4.74097	5.31935	5.08495	4.97798	5.65223	4.72462	5.90753	4.73393	5.2234	4.73243	4.85808	4.72843	5.05871	5.0499	5.91895	5.10119	4.82033	5.73329	4.81568	4.73786	4.95587	4.43457	4.74742	4.86327	4.70917	4.91351	5.42897	4.70317	4.66802	4.926	5.03234	4.92496	4.83765	5.02934	4.7322
chr17	21967373	21968242	17548023	NM_001001491 // Tpm4 // tropomyosin 4 // 8 B3.3|8 // 326618 /// ENSMUST00000003575 // T	Tpm4	NM_001001491	NM_001001491 // RefSeq // Mus musculus tropomyosin 4 (Tpm4), mRNA. // chr17 // 68 // 10		10.0656	10.0623	10.2134	8.99362	10.243	10.104	10.1459	9.8352	10.254	10.1658	10.0613	10.1338	10.1908	10.135	10.1385	9.11782	10.195	9.9121	9.99549	9.8594	10.0648	10.122	9.7757	9.85433	9.956	10.0818	10.3993	10.167	10.1566	9.87323	9.97393	10.2044	10.1644	10.2843	10.0161	10.0507	10.2074	10.139	10.3601	10.0942	9.86698
chr17	22337989	22361400	17341412	NM_176962 // Zfp944 // zinc finger protein 944 // 17 A3.3|17 // 319615 /// ENSMUST00000	Zfp944	NM_176962	NM_176962 // RefSeq // Mus musculus zinc finger protein 944 (Zfp944), mRNA. // chr17 //		6.25914	7.15498	7.31154	5.33159	6.18446	6.8538	7.22056	6.28625	6.70055	6.6656	6.47919	7.00022	6.79777	7.01701	5.95579	6.11376	7.5832	5.83436	6.79647	6.58838	6.69106	7.15218	6.32107	7.12831	7.24048	6.85133	7.3774	6.88171	7.12711	6.90211	7.10345	7.17514	7.24919	7.39797	6.69169	7.55086	7.21478	7.03359	7.18014	6.99461	7.19135
chr17	30215524	30576449	17343119	NM_027060 // Btbd9 // BTB (POZ) domain containing 9 // 17|17 B1 // 224671 /// NM_172618	Btbd9	NM_027060	NM_027060 // RefSeq // Mus musculus BTB (POZ) domain containing 9 (Btbd9), transcript v		8.59285	9.15495	9.1843	8.82594	8.54828	8.63303	9.03554	8.84523	8.85922	8.9556	8.85134	8.97494	8.80033	8.92755	9.19634	9.27705	9.54559	9.1424	8.86032	9.01359	9.07494	8.79914	8.71672	9.0742	9.27321	9.01683	8.99085	8.6121	8.94143	8.78912	9.24545	9.01634	9.11811	9.29287	9.20022	9.18976	9.05969	9.18881	9.05995	8.99261	9.14839
chr17	33646233	33686860	17343580	ENSMUST00000148178 // Hnrnpm // heterogeneous nuclear ribonucleoprotein M // 17 B1|17 /	Hnrnpm	ENSMUST00000148178	ENSMUST00000148178 // ENSEMBL // cdna:known chromosome:NCBIM37:17:33783178:33823805:-1		10.738	10.9451	11.0282	10.174	10.8384	10.7018	10.8836	10.3665	10.6704	10.9685	10.795	10.9271	10.9707	11.0073	10.6549	10.9221	11.158	11.0556	10.83	10.8944	10.8424	11.0218	10.9325	10.7869	11.0655	10.8937	11.1479	10.8839	11.0396	10.8561	11.1044	10.9371	10.9925	11.3128	10.8276	11.1799	11.0968	10.7796	11.0943	11.0531	11.0322
chr17	27143969	27167764	17342699	NM_173027 // Ip6k3 // inositol hexaphosphate kinase 3 // 17 A3.3|17 // 271424 /// ENSMU	Ip6k3	NM_173027	NM_173027 // RefSeq // Mus musculus inositol hexaphosphate kinase 3 (Ip6k3), mRNA. // c		6.05484	5.73048	5.71853	5.16239	5.88555	5.71542	5.61369	6.01464	5.50454	5.85795	5.4091	5.59297	5.6383	5.73598	5.68267	5.42773	5.70694	5.64064	5.66296	5.78001	5.7364	5.6207	5.89517	5.52466	5.27986	5.73896	5.61726	5.57716	5.38098	5.2611	5.45893	5.92476	5.84229	5.33459	5.5719	5.83486	5.66153	5.64123	5.66094	5.51574	5.63712
chr17	12227621	12318748	17340787	NM_011948 // Map3k4 // mitogen-activated protein kinase kinase kinase 4 // 17 A1|17 8.4	Map3k4	NM_011948	NM_011948 // RefSeq // Mus musculus mitogen-activated protein kinase kinase kinase 4 (M		8.90814	9.3267	9.07474	9.08219	9.08352	9.18989	8.93294	9.41428	9.0176	8.85684	8.91766	9.39547	9.05069	9.18668	9.38607	9.54069	9.62754	9.53518	9.1022	9.38195	9.24174	9.28144	9.2841	9.23718	9.16754	9.72485	9.18198	9.08553	9.31286	8.97509	9.29444	8.91922	9.21131	9.54576	9.03584	9.3317	9.35954	9.16411	9.51992	9.37164	9.69933
chr17	25016086	25099499	17334502	NM_134126 // Ift140 // intraflagellar transport 140 // 17 A3.3|17 // 106633 /// ENSMUST	Ift140	NM_134126	NM_134126 // RefSeq // Mus musculus intraflagellar transport 140 (Ift140), mRNA. // chr		8.17934	8.36429	8.40938	8.40757	8.08304	8.29589	8.19476	7.8809	8.01607	8.28795	8.50792	8.27793	8.06683	8.10019	8.58851	8.40623	8.44601	8.40105	8.3007	8.19701	7.89808	8.24407	7.8591	8.33366	8.21332	8.52453	8.37639	7.88132	7.95262	7.73166	8.27711	8.03328	8.44166	8.19197	8.22197	8.21418	8.03311	8.26042	8.23313	8.2917	7.98936
chr17	32113417	32141844	17335923	---		---	BC048393 // GenBank // Mus musculus, clone IMAGE:6337397, mRNA. // chr17 // 100 // 100		6.32083	6.56531	6.1677	6.79356	6.79366	6.66933	6.46006	6.58635	5.90012	6.19881	6.55697	6.41663	6.29212	6.30181	6.45617	6.67136	6.35518	6.37949	6.30051	6.22858	6.27416	6.0473	6.45669	6.4582	6.43055	6.35692	6.32755	6.06942	6.16005	6.05395	6.20448	6.38029	6.48408	6.22473	6.49425	6.40206	6.10665	6.30813	6.3772	6.4896	5.85893
chr17	4678020	4678126	17332737	---		---	ENSMUST00000101865 // ENSEMBL // ncrna:snRNA chromosome:NCBIM37:17:4678020:4678126:1 ge		4.8046	5.19319	4.93127	5.06474	4.64093	4.75814	4.65482	4.37428	4.96273	5.11756	4.56661	4.82443	4.94899	5.17091	4.11664	4.9339	5.04452	4.82453	4.67697	4.76441	4.70648	4.89983	4.33069	4.77151	5.15849	4.74163	5.39444	5.37889	4.88498	4.81168	4.81295	5.17806	5.11749	4.82428	4.99527	5.14703	4.75968	4.94423	5.2135	4.63141	5.21368
chr17	35935624	35937997	17344508	XM_003689212 // Gm9840 // predicted gene 9840 // 17 B1|17 // 100043674	Gm9840	XM_003689212	XM_003689212 // RefSeq // PREDICTED: Mus musculus predicted gene 9840 (Gm9840), mRNA. /		5.68586	5.31351	5.95487	4.36144	5.64884	5.60825	5.69132	5.7698	5.25986	4.87573	5.414	4.8949	5.70441	5.20123	4.59875	4.47773	4.57363	4.18745	5.16428	4.99365	5.73224	4.81291	5.19459	4.5047	5.08929	4.84372	5.57594	4.97618	5.31936	4.85978	5.14169	4.70563	5.46275	5.6101	5.30406	4.90273	5.19349	4.93734	5.96941	5.58891	6.07249
chr17	25184561	25187662	17334599	NM_183150 // BC003965 // cDNA sequence BC003965 // 17 A3.3|17 // 214489 /// BC094389 //	BC003965	NM_183150	NM_183150 // RefSeq // Mus musculus cDNA sequence BC003965 (BC003965), mRNA. // chr17 /		7.90451	7.90986	7.77527	7.8863	7.59095	7.4129	7.78913	7.55114	7.69786	7.69887	7.67498	7.72248	7.48844	7.83342	7.57707	7.87643	7.88684	7.55555	7.59818	7.70351	7.76627	7.72862	7.52318	7.86829	7.91513	7.72605	7.51361	7.53507	7.9007	7.5138	7.81514	7.93443	7.90067	7.86817	7.63765	7.86516	7.6997	7.68671	7.97816	7.78608	7.823
chr17	24215054	24220790	17341769	BC072612 // 1600002H07Rik // RIKEN cDNA 1600002H07 gene // 17 A3.3|17 // 72016 /// ENSM	1600002H07Rik	BC072612	BC072612 // GenBank // Mus musculus RIKEN cDNA 1600002H07 gene, mRNA (cDNA clone MGC:99		8.81848	8.99149	8.91384	9.20514	8.71941	8.7656	8.79583	7.729	8.62505	9.02982	8.99504	8.98415	8.91516	9.04277	8.84823	8.91019	9.32911	8.9424	8.71752	8.92878	8.51507	8.82656	8.63036	8.57078	8.65757	8.88005	8.84896	8.609	8.81017	8.11357	8.87423	8.82956	8.80902	8.98263	8.47896	8.94168	8.89531	9.00984	8.96462	8.87461	8.96883
chr17	13120531	13120695	17341020	---		---	ENSMUST00000157705 // ENSEMBL // ncrna:snRNA chromosome:NCBIM37:17:13313397:13313561:-1		5.4658	5.31661	5.43952	5.68918	5.74948	5.81572	5.65048	5.76977	5.61165	5.44774	5.66416	5.46057	5.82385	5.45514	5.22245	5.69882	5.61018	5.53363	5.50509	5.48479	5.57409	5.5403	5.20231	5.38342	5.44133	5.58904	5.65996	5.19399	5.85452	5.82404	5.49514	5.55945	5.85667	5.40317	5.78359	5.57505	5.90098	5.40687	5.51318	5.8118	5.14873
chr17	32659410	32676687	17335998	ENSMUST00000165061 // Cyp4f40 // cytochrome P450, family 4, subfamily f, polypeptide 40	Cyp4f40	ENSMUST00000165061	ENSMUST00000165061 // ENSEMBL // cdna:known chromosome:NCBIM37:17:32796355:32813632:1 g		3.42647	3.72551	3.47194	3.82774	3.58242	3.53273	3.78565	3.40369	3.53466	3.62023	3.30043	3.58849	3.86593	3.28029	3.39214	3.6398	3.49774	3.69132	3.60663	3.50165	3.60932	3.68434	3.43915	3.47759	3.51273	3.36984	3.36237	3.43387	3.47751	3.53296	3.40223	3.30668	3.28664	3.55804	3.61775	3.59025	3.97606	3.42876	3.24118	3.31552	3.5514
chr17	21926960	21962464	17341378	NM_001199048 // Zfp942 // zinc finger protein 942 // 17 A3.2|17 // 73233 /// ENSMUST000	Zfp942	NM_001199048	NM_001199048 // RefSeq // Mus musculus zinc finger protein 942 (Zfp942), mRNA. // chr17		6.86313	7.55148	8.07452	6.21446	6.75231	6.84953	7.78041	7.62211	7.75702	7.91052	6.73194	8.0194	7.56208	8.09445	5.77159	7.25973	8.58294	6.95132	7.43655	7.79707	8.1723	7.66926	7.37124	8.15139	7.98202	7.68641	8.32038	8.0148	7.97128	8.05001	8.1722	7.94605	7.41287	8.29264	7.702	8.18792	7.84113	8.16526	8.29394	7.01494	8.39203
chr17	23459675	23479597	17341477	AB540948 // Vmn2r117 // vomeronasal 2, receptor 117 // 17 A3.3|17 // 619788 /// ENSMUST	Vmn2r117	AB540948	AB540948 // GenBank // Mus musculus domesticus V2Rp6 mRNA for vomeronasal 2 receptor p6		3.56781	3.18512	3.68319	3.47755	3.28631	3.78133	3.24586	3.37529	3.45911	4.0235	3.37101	3.44356	3.7434	3.28659	2.91576	3.66268	3.41734	3.37208	3.34718	3.31488	3.43254	3.40708	3.18274	3.42326	3.33915	3.21441	3.4265	3.4739	3.1631	3.4393	3.2691	3.39618	3.68482	3.46526	3.52138	3.39733	3.75597	3.45107	3.42556	3.34737	3.54702
chr17	27563575	27565732	17342740	ENSMUST00000154473 // AI413582 // expressed sequence AI413582 // 17 A3.3|17 // 106672 /	AI413582	ENSMUST00000154473	ENSMUST00000154473 // ENSEMBL // cdna:putative chromosome:NCBIM37:17:27700520:27702677:		7.6392	7.70558	7.84867	7.643	7.43161	7.70531	7.26185	7.80127	7.60555	7.52816	7.49274	8.19853	7.53383	7.73512	6.96674	7.83182	7.93644	7.4302	7.21677	7.91207	7.46675	7.82385	7.55972	7.48589	7.71653	7.33781	7.61245	7.87519	7.61556	7.84584	7.57659	7.86557	7.76098	7.67027	7.40769	7.53004	7.49216	7.68291	8.11391	7.75854	7.47648
chr17	13221188	13227658	17333375	NM_013741 // Smok2a // sperm motility kinase 2A // 17 A1|17 // 27263 /// ENSMUST0000008	Smok2a	NM_013741	NM_013741 // RefSeq // Mus musculus sperm motility kinase 2A (Smok2a), mRNA. // chr17 /		4.9682	4.63214	5.16479	6.06709	5.01908	5.03653	4.94421	4.91621	5.13749	4.34959	4.73102	5.10769	4.61774	4.56173	5.26638	4.99772	4.91816	4.70573	4.99652	4.87718	4.8571	4.94923	4.6922	4.79913	5.0131	5.25616	4.89742	4.92195	4.90959	4.87461	4.93429	5.27802	4.95146	5.10718	5.1486	4.58571	4.45729	5.05239	5.10473	5.02414	5.09255
chr17	12837935	12838134	17340899	---		---	ENSMUST00000164571 // ENSEMBL // cdna:known chromosome:NCBIM37:17:13030801:13031000:-1		12.8717	12.7379	12.5142	12.414	12.8582	12.6793	12.5136	12.6693	12.5978	12.4584	12.6013	12.5916	12.812	12.4482	12.9997	12.298	12.6614	12.7666	12.7167	12.5182	12.5691	12.5779	12.605	12.5875	12.4709	12.577	12.5394	12.7084	12.5277	12.7294	12.467	12.264	12.8024	12.4386	12.6583	12.4873	12.5091	12.8243	12.7042	12.6759	12.3865
chr17	28970885	29007945	17342964	NM_134115 // Stk38 // serine/threonine kinase 38 // 17 A3.3|17 // 106504 /// ENSMUST000	Stk38	NM_134115	NM_134115 // RefSeq // Mus musculus serine/threonine kinase 38 (Stk38), mRNA. // chr17		8.69134	8.82176	8.96258	8.86601	8.52875	8.60955	8.8028	8.57373	8.81394	8.69246	9.06279	8.95358	8.83357	9.10218	8.65694	8.96505	9.43081	8.64621	8.94317	8.64969	9.09911	8.98581	8.59142	9.00916	8.9206	8.61409	9.23825	8.5544	8.6538	8.73302	9.24961	8.7502	9.03092	9.22634	8.54707	9.18212	9.12181	8.9761	8.76155	8.51497	8.86385
chr17	27565112	27566220	17335138	---		---	ENSMUST00000097361 // ENSEMBL // cdna:known chromosome:NCBIM37:17:27702057:27703165:1 g		5.15243	5.56786	5.59482	5.57084	5.51302	5.50953	5.43761	5.53533	5.74054	5.64883	6.10664	5.40984	5.91265	5.20539	6.06804	5.12045	6.03894	5.6457	5.58179	5.48641	5.39415	5.54752	5.60014	5.44954	5.09626	5.4564	5.61852	5.23075	5.41387	5.36274	5.51631	5.41326	5.99115	5.44303	5.41167	5.63696	5.52577	5.65535	5.6997	5.53108	5.49019
chr17	28801090	28838789	17335398	NM_001081315 // Brpf3 // bromodomain and PHD finger containing, 3 // 17 A3.3|17 // 2689	Brpf3	NM_001081315	NM_001081315 // RefSeq // Mus musculus bromodomain and PHD finger containing, 3 (Brpf3)		7.62609	7.44761	7.35054	7.36551	7.22788	7.58247	7.16985	7.01849	7.46864	7.34963	7.25206	7.44153	7.49888	7.41184	7.53558	7.4217	7.70004	7.55774	7.20049	7.27846	7.46946	7.22594	7.26904	7.74997	7.27621	7.37482	7.45395	7.32128	7.19946	7.32955	7.37865	7.17232	7.28662	7.56515	7.66648	7.43626	7.45216	7.45692	7.31285	7.40435	7.63936
chr17	28142316	28174852	17335234	ENSMUST00000043503 // Scube3 // signal peptide, CUB domain, EGF-like 3 // 17 A3.3|17 //	Scube3	ENSMUST00000043503	ENSMUST00000043503 // ENSEMBL // cdna:known chromosome:NCBIM37:17:28279261:28311797:1 g		5.10011	5.67978	5.72272	5.28734	5.89069	5.54381	5.38811	5.15733	5.34688	6.15743	5.93134	5.48025	5.32425	5.30667	5.81859	5.7007	5.60437	5.65285	5.50827	5.76424	5.43955	5.19429	5.29904	5.10051	5.61281	5.47784	5.18171	5.14117	5.3943	5.22771	5.90654	5.58905	5.47877	5.32256	5.45632	5.3919	6.12716	5.19021	5.3472	5.39722	6.1162
chr17	25730919	25731461	17342335	NM_028009 // Rpusd1 // RNA pseudouridylate synthase domain containing 1 // 17 A3.3|17 /	Rpusd1	NM_028009	NM_028009 // RefSeq // Mus musculus RNA pseudouridylate synthase domain containing 1 (R		5.45042	5.57665	5.7699	5.82645	5.68631	5.63149	6.04721	6.09918	5.84254	6.00353	6.1063	5.61718	5.9025	5.7013	5.59957	5.65079	5.99546	5.66806	6.04602	5.87858	5.3867	5.84	5.52904	5.73493	5.79052	5.34293	5.48039	5.74555	5.88801	5.80222	5.63124	5.73712	5.80043	5.60797	5.437	5.66859	5.78994	5.79793	5.74198	5.99024	5.55497
chr17	17064103	17089631	17333642	NM_001005358 // Zfp960 // zinc finger protein 960 // 17 A3.1|17 // 449000 /// ENSMUST00	Zfp960	NM_001005358	NM_001005358 // RefSeq // Mus musculus zinc finger protein 960 (Zfp960), transcript var		8.41406	8.20824	8.7133	7.91084	8.61099	7.88855	8.1925	8.42727	8.66411	8.12795	7.68096	8.38451	8.22763	8.65323	7.73744	7.95501	9.52395	7.80539	8.00539	8.28548	8.72241	7.53344	8.19764	8.76151	8.12772	7.10228	8.81944	8.49746	8.04469	8.62633	8.64941	7.37881	8.64199	9.11212	7.39122	8.77342	8.41026	8.89952	9.12046	7.10229	8.75182
chr17	5816054	5816700	17340500	NM_026468 // Atp5g2 // ATP synthase, H+ transporting, mitochondrial F0 complex, subunit	Atp5g2	NM_026468	NM_026468 // RefSeq // Mus musculus ATP synthase, H+ transporting, mitochondrial F0 com		11.0853	10.9124	10.834	10.9399	10.8332	10.6561	10.9751	10.8417	10.7613	10.9242	10.7561	10.7533	10.8346	10.786	11.1252	11.0132	11.005	10.3991	11.0329	10.951	10.5772	10.4575	11.0456	10.9337	10.8764	11.0963	10.9037	11.0964	10.7264	10.7454	10.9782	10.4934	10.9996	10.487	11.1547	11.0824	10.9362	10.9571	10.9116	11.0088	10.4046
chr17	12466844	12479578	17333289	AK021075 // C030013G03Rik // RIKEN cDNA C030013G03 gene // 17|17 // 77414 /// AK021075	C030013G03Rik	AK021075	AK021075 // GenBank HTC // Mus musculus adult male corpus striatum cDNA, RIKEN full-len		3.37049	3.11879	3.30617	3.2984	3.15829	3.06944	3.30911	3.19302	3.23073	3.07109	3.22725	3.42952	3.10419	3.19577	3.89371	3.45186	3.30484	3.37093	3.13901	3.33734	3.27997	3.14913	3.29086	3.09679	3.19174	3.07553	3.31754	3.15946	2.99571	3.32136	3.10348	3.31378	3.26197	3.35963	3.18002	3.20625	3.31176	3.34111	3.23513	3.13551	3.33041
chr17	26620358	26625100	17342653	---		---	ENSMUST00000165911 // ENSEMBL // cdna:putative chromosome:NCBIM37:17:26757303:26762045:		5.38996	5.49896	5.39881	4.9509	5.41521	5.64318	5.44881	5.87457	5.31136	5.23278	5.76572	5.41188	5.33591	5.75952	5.529	5.32219	5.38937	5.50302	5.57267	5.29981	5.6441	5.62933	5.34013	5.42782	5.39686	5.44924	5.43077	5.22183	5.43973	5.4684	5.27736	5.43296	5.71495	5.21877	5.67393	5.5956	5.89473	5.53208	5.77334	5.30111	5.44348
chr17	35185095	35188440	17344303	NM_010734 // Lst1 // leukocyte specific transcript 1 // 17 B1|17 19.06 cM // 16988 ///	Lst1	NM_010734	NM_010734 // RefSeq // Mus musculus leukocyte specific transcript 1 (Lst1), mRNA. // ch		4.59776	4.18616	3.97472	4.71824	4.52996	3.74525	4.06583	4.15133	4.65884	4.07952	4.32698	4.2463	4.1749	4.17077	4.35889	4.08396	4.64175	4.84292	4.32238	4.59457	4.5615	4.26938	3.8094	4.29223	4.35741	4.42604	4.41742	4.24627	4.80482	4.25396	4.50996	4.17395	4.4441	4.67105	4.05993	3.90151	4.28763	4.30115	4.21926	4.02086	3.89339
chr17	35162563	35162696	17344287	---		---	ENSMUST00000082919 // ENSEMBL // ncrna:snoRNA chromosome:NCBIM37:17:35299508:35299641:-		9.88342	10.3472	9.8497	9.81902	10.6408	10.1679	10.0477	9.89284	10.1477	9.84269	10.2356	9.7078	10.3759	10.5541	11.2369	9.86437	9.81774	10.8678	10.3056	9.69602	10.1121	10.0134	10.2019	9.86726	10.0861	10.4211	10.8777	10.7659	10.3536	10.0421	9.72208	10.0549	10.6461	10.4392	9.89125	9.47992	10.0531	10.3336	10.4306	10.7834	9.75133
chr17	24264259	24351029	17341803	ENSMUST00000121226 // Abca17 // ATP-binding cassette, sub-family A (ABC1), member 17 //	Abca17	ENSMUST00000121226	ENSMUST00000121226 // ENSEMBL // cdna:known chromosome:NCBIM37:17:24401204:24487974:-1		5.24614	5.11997	4.93639	5.86345	5.7197	5.32333	5.387	5.32626	5.31793	5.64228	5.12724	5.17565	5.23195	5.52631	5.24356	5.42509	5.45274	5.2215	4.85397	5.0308	5.23985	5.12061	5.06466	5.44017	5.3561	5.24049	5.42582	5.0998	5.22127	4.97233	5.27333	5.34516	5.19859	5.20641	4.93802	5.17188	5.27519	5.19272	5.12174	5.41867	5.11408
chr17	21485177	21488875	17341358	---		---	AK144893 // GenBank HTC // Mus musculus lung RCB-0558 LLC cDNA, RIKEN full-length enric		5.55802	6.06813	5.74834	5.96367	6.07141	5.90366	5.70712	5.84063	5.6105	5.56547	5.8346	5.84638	5.69355	5.84319	6.00062	6.07757	5.97087	6.08294	5.98737	5.70953	5.60376	5.89565	6.0529	5.59912	5.78605	5.80459	5.77699	5.53563	5.61268	5.94449	5.95517	5.5911	6.04895	5.71662	5.93497	5.5428	5.83961	6.004	5.49787	5.98615	5.68347
chr17	34354822	34369493	17336516	NM_079835 // Btnl2 // butyrophilin-like 2 // 17 B1|17 18.7 cM // 547431 /// BC141103 //	Btnl2	NM_079835	NM_079835 // RefSeq // Mus musculus butyrophilin-like 2 (Btnl2), mRNA. // chr17 // 100		5.66663	5.35229	5.5347	5.36597	5.48497	5.26268	5.34576	5.39693	5.25236	5.69812	5.65588	5.59577	5.52825	5.49031	5.78153	5.35471	5.41404	5.68493	5.19849	5.52755	5.44533	5.28817	5.69955	5.28966	5.50064	5.54146	5.41725	5.38224	5.25993	5.53145	5.44772	5.38009	5.49283	5.39357	5.68225	5.22139	5.68475	5.58618	5.3169	5.37861	5.40999
chr17	28066747	28080639	17342810	NM_013687 // Tcp11 // t-complex protein 11 // 17 A3-B|17 14.35 cM // 21463 /// ENSMUST0	Tcp11	NM_013687	NM_013687 // RefSeq // Mus musculus t-complex protein 11 (Tcp11), transcript variant 1,		5.9116	6.07115	6.04028	5.51826	5.99646	6.16916	6.00949	5.99384	5.58916	6.57378	6.23158	6.06137	6.08776	5.77589	6.34446	6.0278	5.97066	6.34605	6.37496	5.78706	5.96655	5.52215	5.99558	6.01149	5.97447	6.15264	5.97769	5.81237	5.83435	5.40864	6.2475	6.40285	6.02779	5.98739	6.1901	5.68247	6.0341	5.82122	5.95358	6.51401	6.19644
chr17	34487405	34497429	17343856	NR_004051 // Btnl5 // butyrophilin-like 5 // 17 B1|17 18.7 cM // 81497	Btnl5	NR_004051	NR_004051 // RefSeq // Mus musculus butyrophilin-like 5 (Btnl5), non-coding RNA. // chr		4.22553	4.01252	3.95366	5.29448	4.26681	4.51355	4.44334	4.05075	3.75706	4.11044	3.80217	4.20291	4.50582	4.25543	4.0129	4.23299	4.1633	5.57786	4.13823	4.44937	4.42059	4.17932	3.71094	3.5937	4.83924	4.25901	3.96004	4.07275	4.33879	4.75079	4.00802	4.10699	4.01031	4.1367	3.65997	4.2903	4.48596	4.79478	4.28165	4.49169	3.54768
chr17	10319945	10320229	17340772	U44941 // Qk // quaking // 17 A1|17 5.9 cM // 19317 /// NR_037588 // B930003M22Rik // R	Qk	U44941	U44941 // GenBank // Mus musculus quaking type II (QKII) mRNA, complete cds. // chr17 /		5.84257	6.3076	5.94692	5.77702	6.09755	6.25802	6.26053	6.21558	5.8469	6.42217	6.46065	6.02546	6.26995	6.01546	6.49632	6.35269	6.32468	6.12967	5.82907	6.30977	5.73912	5.72129	6.01701	6.2255	5.93092	6.06869	6.05017	5.75799	5.76284	6.08398	6.37276	6.16471	5.86208	5.85895	5.754	6.19288	6.01007	6.16081	5.95724	6.22938	5.66481
chr17	25318654	25322684	17334656	NM_053260 // Prss29 // protease, serine, 29 // 17 A3.3|17 10.42 cM // 114662 /// ENSMUS	Prss29	NM_053260	NM_053260 // RefSeq // Mus musculus protease, serine, 29 (Prss29), mRNA. // chr17 // 10		5.96481	6.2711	5.95686	5.93796	6.01978	5.95501	5.98169	6.14641	5.84845	5.98142	5.99898	5.85314	5.94554	5.9748	5.94853	5.8587	5.74811	6.10274	6.21297	5.93882	5.78083	5.93158	6.30413	5.90027	5.99429	5.81638	5.97116	5.9219	6.02873	5.8623	5.86779	5.93268	5.9452	5.95686	6.40106	5.70757	6.58243	5.90044	6.06638	6.28636	5.7073
chr17	27988028	28008432	17342807	ENSMUST00000139173 // Anks1 // ankyrin repeat and SAM domain containing 1 // 17 A3.3|17	Anks1	ENSMUST00000139173	ENSMUST00000139173 // ENSEMBL // cdna:known chromosome:NCBIM37:17:28144530:28199544:1 g		4.10772	4.447	4.61487	5.46208	4.59744	4.94852	4.53177	4.69837	4.66687	4.90828	5.03981	4.63639	5.03603	4.55819	3.94788	4.76726	4.9006	4.34356	4.90287	4.74047	4.68781	4.3989	4.59611	4.60931	4.53022	4.62469	4.72027	4.37452	4.49972	4.90877	4.62238	4.38655	4.62544	4.71157	4.70387	4.67519	4.98306	4.48573	4.62995	4.55348	4.68947
chr17	25306112	25306248	17334646	---		---	ENSMUST00000158305 // ENSEMBL // ncrna:snoRNA chromosome:NCBIM37:17:25443057:25443193:1		3.45669	3.87683	3.69833	3.69139	3.528	3.90963	3.66509	3.63948	3.67257	3.87094	3.54636	3.52697	3.99512	3.64268	3.28679	4.07283	3.58098	3.89053	3.73936	3.56081	3.64712	3.80651	3.84683	3.40929	3.50097	3.47966	4.23495	3.5523	3.70518	3.75985	3.41628	3.7579	3.74555	3.53292	3.82579	3.45915	3.59517	3.92528	3.79228	3.72542	3.64901
chr17	21879570	21909926	17341371	ENSMUST00000106026 // 2210404O09Rik // RIKEN cDNA 2210404O09 gene // 17 A3.2|17 // 7008	2210404O09Rik	ENSMUST00000106026	ENSMUST00000106026 // ENSEMBL // cdna:known chromosome:NCBIM37:17:22016537:22045059:-1		4.52947	4.30007	4.48657	4.66689	3.87613	4.4001	4.19422	4.11058	4.50462	4.17722	4.39033	3.82528	4.70125	4.14409	4.13502	4.53816	4.7555	4.45277	4.47536	4.46724	4.47819	4.4123	3.8616	4.24579	4.29605	4.34813	4.59418	4.24752	4.35483	4.12942	4.54966	4.1235	4.72058	4.52939	4.08283	4.54797	4.40986	4.23967	4.26947	4.38213	4.48171
chr17	34377132	34386028	17336526	NM_001111094 // Btnl1 // butyrophilin-like 1 // 17 B1|17 18.7 cM // 100038862 /// ENSMU	Btnl1	NM_001111094	NM_001111094 // RefSeq // Mus musculus butyrophilin-like 1 (Btnl1), mRNA. // chr17 // 1		3.73667	3.93971	3.72669	3.86582	3.93464	3.89994	3.85287	4.27777	3.76912	3.82763	3.68656	3.99172	3.99617	3.61945	3.76681	3.49811	3.94164	3.83086	3.94686	3.76348	3.56808	3.77031	3.65266	3.61845	3.61054	3.89117	3.5587	3.85193	3.69069	3.57003	3.71975	3.99333	3.79226	3.71055	3.96078	3.70438	4.18469	3.96	3.82634	3.90376	3.46427
chr17	15350813	15354461	17341175	NR_033511 // Gm10510 // predicted gene 10510 // --- // 100038481	Gm10510	NR_033511	NR_033511 // RefSeq // Mus musculus predicted gene 10510 (Gm10510), non-coding RNA. //		4.1811	4.3994	4.38575	4.67396	4.38457	4.4839	4.41474	4.46906	4.38046	4.14811	4.51342	4.19933	4.64315	4.4409	4.38161	4.51226	4.34188	4.3895	4.8286	4.38243	4.26354	4.15417	4.42199	4.13772	4.15517	3.97481	4.26955	4.28941	4.18836	3.9225	4.51312	4.46137	4.64553	4.09866	4.37585	4.23897	4.54276	4.45082	4.19262	4.82219	3.98322
chr17	24473550	24479078	17341872	NM_001252463 // Mlst8 // MTOR associated protein, LST8 homolog (S. cerevisiae) // 17 A3	Mlst8	NM_001252463	NM_001252463 // RefSeq // Mus musculus MTOR associated protein, LST8 homolog (S. cerevi		9.13298	9.33914	9.60439	9.82579	9.24685	9.29187	9.19239	8.73292	9.02161	9.13184	9.42949	9.46995	9.27539	9.41587	9.09219	9.6893	9.76104	9.05757	9.34985	9.27673	8.96851	9.40291	8.71142	9.26586	9.18845	9.17362	9.33917	8.80163	9.24723	8.8127	9.32457	9.20402	9.53332	9.62746	9.1899	9.55667	9.31813	9.36247	9.6285	9.27448	9.48143
chr17	17402672	17459387	17333686	NM_025681 // Lix1 // limb expression 1 homolog (chicken) // 17|17 A3.1 // 66643 /// ENS	Lix1	NM_025681	NM_025681 // RefSeq // Mus musculus limb expression 1 homolog (chicken) (Lix1), mRNA. /		4.39428	4.41828	4.43423	4.29035	4.38098	5.13958	4.28561	5.01592	4.4119	4.16297	4.93624	4.72437	5.08479	4.76233	4.5408	5.13381	4.94415	4.48013	4.55055	4.25494	4.55557	5.39606	4.63409	5.13622	4.81141	4.52331	4.43238	3.98144	4.24878	4.65392	4.91027	4.71841	4.65663	4.9614	4.76488	4.60412	4.60949	4.28862	4.24034	4.14272	6.66186
chr17	17193439	17269715	17333658	AK138383 // Gm6712 // predicted gene 6712 // 17 A3.1|17 // 626854 /// AK138383 // Gm671	Gm6712	AK138383	AK138383 // GenBank HTC // Mus musculus adult male hypothalamus cDNA, RIKEN full-length		7.98597	8.8099	9.41677	8.76711	8.78069	8.21257	8.61183	9.28396	9.26079	8.65049	8.24482	9.0448	8.53083	9.07744	8.082	8.89817	9.87867	8.33282	8.67061	8.70056	9.40043	8.69291	9.0759	9.47965	8.83481	8.44143	9.0253	9.44234	8.4515	9.5267	9.11329	8.901	8.62461	9.80977	7.7023	9.11452	9.05279	8.93618	8.78929	8.58795	8.9979
chr17	25162461	25171913	17334576	NM_001079929 // Ccdc154 // coiled-coil domain containing 154 // 17 A3.3|17 // 207209 //	Ccdc154	NM_001079929	NM_001079929 // RefSeq // Mus musculus coiled-coil domain containing 154 (Ccdc154), mRN		5.07509	5.00368	5.19045	4.34756	5.02559	5.12479	5.03618	5.19939	4.92141	5.05207	4.97828	5.00208	4.86364	5.03562	4.87266	5.03441	5.02424	5.06288	4.9347	5.03496	4.94372	5.19409	5.21779	4.87874	4.83474	4.80302	5.1813	4.93956	4.76075	5.12604	5.12039	4.8189	4.96207	4.77609	5.21492	4.85443	5.38261	4.87812	4.96478	5.19131	4.6682
chr17	35089263	35102987	17336939	NM_178592 // Abhd16a // abhydrolase domain containing 16A // 17 B1|17 19.01 cM // 19374	Abhd16a	NM_178592	NM_178592 // RefSeq // Mus musculus abhydrolase domain containing 16A (Abhd16a), mRNA.		8.20109	8.31455	8.32033	8.12375	8.06923	8.41437	8.44564	8.87232	8.81573	8.29592	8.55844	8.12253	8.27606	8.07742	8.39673	7.98707	8.76542	8.23125	8.41988	8.25587	8.42961	8.11996	8.2872	8.69263	8.09118	8.52177	8.06165	8.33418	7.75922	8.48777	7.9088	7.85082	8.40645	8.11336	8.44922	8.45947	8.27713	8.41528	8.25523	8.50992	7.98431
chr17	15012763	15024218	17341161	NM_001123370 // 9030025P20Rik // RIKEN cDNA 9030025P20 gene // 17 A2|17 8.15 cM // 1000	9030025P20Rik	NM_001123370	NM_001123370 // RefSeq // Mus musculus RIKEN cDNA 9030025P20 gene (9030025P20Rik), mRNA		7.51197	7.6716	7.57396	7.30983	8.01134	7.19501	7.13532	7.97975	7.38051	7.6097	7.68907	7.47958	7.85674	7.51796	7.11831	7.50915	7.99737	7.61693	7.761	7.68186	7.64819	7.53389	7.59148	7.90451	7.55914	7.69285	7.75748	7.55326	7.53358	7.29574	7.59844	7.31658	7.55254	7.71674	7.41333	7.62533	7.56924	7.30543	7.58456	7.6135	7.40274
chr17	25369273	25374442	17334674	NM_012034 // Tpsg1 // tryptase gamma 1 // 17 A3.3|17 10.38 cM // 26945 /// ENSMUST00000	Tpsg1	NM_012034	NM_012034 // RefSeq // Mus musculus tryptase gamma 1 (Tpsg1), mRNA. // chr17 // 100 //		5.11233	4.76405	4.94547	4.73469	5.03553	5.25686	5.03392	4.96724	4.99853	5.00348	5.0842	4.90827	4.85178	4.81474	4.64942	4.97273	4.75203	4.85288	4.86931	4.72079	4.84939	4.8818	5.20682	4.84566	4.92698	4.5803	4.97649	4.86785	5.36186	4.80721	4.8816	4.76825	4.96277	5.00612	4.94848	4.94379	4.88548	5.07689	4.90487	4.70955	5.04074
chr17	21095170	21200478	17333881	AK030245 // Gm5092 // predicted gene 5092 // 17 A3.2|17 // 328766 /// XM_003689303 // G	Gm5092	AK030245	AK030245 // GenBank HTC // Mus musculus adult male testis cDNA, RIKEN full-length enric		4.90105	5.49925	4.93762	5.08142	5.36425	5.20992	5.22682	5.52518	4.60903	5.33044	5.24469	5.07365	5.34853	5.30077	4.79589	4.91328	5.26623	5.35452	5.12449	5.22208	5.07253	5.29266	5.53579	4.77784	5.29922	5.02942	5.41807	4.972	5.12399	5.20529	5.19797	5.38133	5.18604	5.00754	5.69264	5.22982	5.52435	5.14172	5.58766	5.45012	4.6739
chr17	13061104	13082481	17333354	ENSMUST00000086787 // Tcp10b // t-complex protein 10b // 17 A1|17 7.8 cM // 21462 /// E	Tcp10b	ENSMUST00000086787	ENSMUST00000086787 // ENSEMBL // cdna:known chromosome:NCBIM37:17:13253970:13275347:1 g		5.0187	4.6147	4.60859	5.25048	5.18347	4.83565	5.06471	5.51951	5.32124	5.33932	4.72773	5.09584	5.57859	4.74161	5.40327	4.96798	5.09975	5.49738	5.29051	5.01996	4.40356	5.3876	5.27251	4.60362	5.12407	4.81581	4.8525	4.94785	5.03179	4.51248	4.77405	4.84254	4.97159	4.98761	5.05782	5.15404	4.85819	5.27348	4.8333	5.21014	5.22282
chr17	29021293	29022402	17335456	---		---	ENSMUST00000130607 // ENSEMBL // havana:lincRNA chromosome:NCBIM37:17:29158238:29159347		4.26772	4.03991	4.09106	4.49323	4.27283	4.34708	4.43791	4.53229	4.27758	4.53396	4.50594	4.21721	4.1455	4.07435	4.45235	4.49848	4.30639	4.14538	4.16161	4.2625	4.40147	4.14694	4.22971	4.01842	4.02225	4.1191	4.2479	3.94527	4.0598	3.96941	4.12707	4.11567	4.39164	4.04615	4.19472	4.27553	4.0794	4.26288	4.17924	4.15723	4.30786
chr17	8340406	8344113	17333102	NM_178774 // Prr18 // proline rich region 18 // 17 A1|17 // 320111 /// ENSMUST000001638	Prr18	NM_178774	NM_178774 // RefSeq // Mus musculus proline rich region 18 (Prr18), transcript variant		6.11375	6.16974	5.9453	5.50658	5.91928	5.99511	6.16042	6.32678	5.68257	6.2227	5.88424	6.07648	6.14612	5.988	6.06601	6.1987	6.25128	6.08033	6.08537	6.2917	6.26329	6.06941	6.24932	6.12217	6.07059	6.02351	6.03666	5.99071	6.38841	6.09018	6.14027	6.59269	6.04779	6.15344	6.15639	5.86106	6.34952	6.03432	6.23435	6.31072	5.97153
chr17	7025482	7087597	17332966	NM_001033442 // Gm1604b // predicted gene 1604b // 17 A1|17 // 381059 /// ENSMUST000000	Gm1604b	NM_001033442	NM_001033442 // RefSeq // Mus musculus predicted gene 1604b (Gm1604b), mRNA. // chr17 /		6.37897	6.65657	6.34101	6.84995	6.16531	6.92432	6.56613	6.42591	6.04174	6.57619	6.73961	6.55163	6.69971	6.38423	6.77711	6.16917	6.32544	6.95633	6.41793	6.42916	6.27447	6.84234	6.43687	6.23102	6.16473	6.30627	6.2857	6.55133	6.26329	6.24847	6.53559	6.53718	6.28606	6.40385	6.75129	6.07495	6.60285	6.5325	6.55624	6.53368	6.62894
chr17	24722060	24724478	17342029	ENSMUST00000045602 // Ndufb10 // NADH dehydrogenase (ubiquinone) 1 beta subcomplex, 10	Ndufb10	ENSMUST00000045602	ENSMUST00000045602 // ENSEMBL // cdna:known chromosome:NCBIM37:17:24859005:24861423:-1		8.03503	7.93336	7.91577	7.84106	7.81098	7.67683	7.62205	7.25253	7.5541	7.82378	7.76547	7.72794	7.76864	7.66373	8.31749	7.81333	8.09228	7.9646	7.81339	7.89638	7.47547	7.95205	7.52938	7.58734	7.5356	7.85923	7.67771	7.50869	7.53336	7.3371	7.65409	7.57354	7.9415	7.67846	7.51992	7.94332	7.50164	7.75721	7.96411	7.96987	7.71667
chr17	20540517	20564756	17341326	NM_001104571 // Vmn2r109 // vomeronasal 2, receptor 109 // 17 A3.2|17 // 627814 /// ENS	Vmn2r109	NM_001104571	NM_001104571 // RefSeq // Mus musculus vomeronasal 2, receptor 109 (Vmn2r109), mRNA. //		4.05588	4.53144	4.31531	4.45817	4.21403	4.76148	4.04168	4.3169	4.21988	4.40077	4.53639	4.44297	4.46984	4.0226	4.12264	4.41269	4.20471	4.18751	4.20678	4.3762	4.20887	4.02827	4.1168	4.06455	4.39067	4.41285	4.2021	4.27191	4.12173	4.15619	4.1377	4.53991	4.21969	4.16006	4.52348	4.1969	4.28489	4.42527	4.13438	4.30543	4.28
chr17	29549788	29606895	17335550	NM_198647 // Tbc1d22b // TBC1 domain family, member 22B // 17 A3.3|17 // 381085 /// ENS	Tbc1d22b	NM_198647	NM_198647 // RefSeq // Mus musculus TBC1 domain family, member 22B (Tbc1d22b), mRNA. //		9.32705	9.18753	9.25207	9.93813	9.09991	9.46922	9.08683	9.0943	9.07929	8.86123	9.4311	9.38509	9.42845	9.45737	9.96554	9.72446	9.88302	8.96028	9.31647	8.97407	8.77435	9.38708	8.31444	9.17019	8.94731	8.81094	8.85503	8.65954	8.79922	8.91752	9.47174	8.9277	9.43924	9.49701	8.93572	9.44567	8.97998	9.39694	8.64858	8.49994	9.41926
chr17	4044658	4082995	17340473	NR_045764 // 4930470H14Rik // RIKEN cDNA 4930470H14 gene // 17 A1|17 // 75815 /// NR_04	4930470H14Rik	NR_045764	NR_045764 // RefSeq // Mus musculus RIKEN cDNA 4930470H14 gene (4930470H14Rik), non-cod		3.18083	3.7228	3.62841	3.8693	3.89346	3.67848	3.85133	3.60099	3.57508	3.9232	3.65554	3.60442	3.91094	3.82225	3.68828	3.59833	3.67439	3.83947	3.5944	3.72362	3.50682	3.50274	3.74757	3.75805	3.46461	3.53135	3.65986	3.44915	3.60334	3.42282	3.60091	4.07395	3.796	3.43478	3.89064	3.86349	3.97339	3.6526	3.57104	3.49554	3.55842
chr17	23833360	23835767	17341631	NM_001081399 // Prss33 // protease, serine, 33 // 17 A3.3|17 10.75 cM // 353130 /// ENS	Prss33	NM_001081399	NM_001081399 // RefSeq // Mus musculus protease, serine, 33 (Prss33), mRNA. // chr17 //		6.21885	5.91758	5.77907	6.36809	6.15408	6.15878	6.30592	6.38427	5.64704	5.72836	6.22831	5.93297	6.00722	6.02326	5.98324	5.63046	6.11841	6.40732	5.70447	5.73268	5.63736	5.78782	6.04983	6.09121	6.04198	5.8817	6.02251	5.8449	5.64537	6.03358	5.63079	5.95891	5.99142	5.85936	5.96173	5.76568	6.23483	6.05611	6.09667	6.38104	5.86131
chr17	25308646	25311876	17334648	NM_053259 // Prss28 // protease, serine, 28 // 17 A3.3|17 10.43 cM // 114661 /// ENSMUS	Prss28	NM_053259	NM_053259 // RefSeq // Mus musculus protease, serine, 28 (Prss28), mRNA. // chr17 // 10		4.50577	4.78088	4.84193	4.83025	5.10464	4.67098	4.76258	5.18672	4.2839	5.16939	4.79278	4.67175	4.75356	4.89628	5.16367	4.28744	4.97872	5.00106	4.6627	4.9126	4.82082	4.92185	4.96204	4.66982	4.83298	4.97625	4.86174	4.75309	4.82913	4.68029	5.11285	5.10988	4.89487	4.66386	5.1867	4.83359	4.84847	4.78484	4.72301	5.18762	5.01608
chr17	34879483	34896844	17336752	NM_198886 // Zbtb12 // zinc finger and BTB domain containing 12 // 17 B1|17 18.87 cM //	Zbtb12	NM_198886	NM_198886 // RefSeq // Mus musculus zinc finger and BTB domain containing 12 (Zbtb12),		6.15654	6.31477	6.4105	5.6624	6.15514	6.25223	6.29183	5.95688	5.75561	6.11249	5.99369	6.01121	6.42884	6.43912	6.2968	5.98789	6.52097	6.46152	6.40851	6.32665	5.96669	5.94932	6.34258	5.75508	5.84598	6.21023	6.25397	6.00679	6.14393	5.5819	6.15429	6.16521	6.58796	6.31979	6.19548	6.38524	6.36442	6.28932	6.38723	6.23494	6.29957
chr17	34071601	34076134	17343755	XM_003689210 // H2-Pb // histocompatibility 2, P region beta locus // 17|17 18.51 cM //	H2-Pb	XM_003689210	ENSMUST00000172731 // ENSEMBL // cdna:pseudogene chromosome:NCBIM37:17:34210707:3421310		4.09619	3.95757	3.79127	3.91112	3.84906	3.98023	4.09451	4.0537	3.79047	4.13751	4.05175	3.97632	3.82504	3.72019	4.02033	4.11835	3.978	3.8244	4.00211	3.81594	3.87922	3.75549	3.84537	3.88556	4.05011	3.97942	3.93665	3.97949	3.87715	4.01409	3.91893	3.69704	3.72375	3.96065	4.08352	3.87942	3.66958	3.70529	3.96754	4.17553	4.00625
chr17	25838838	25844851	17342414	NM_145999 // Rhot2 // ras homolog gene family, member T2 // 17 A3.3|17 11.6 cM // 21495	Rhot2	NM_145999	NM_145999 // RefSeq // Mus musculus ras homolog gene family, member T2 (Rhot2), nuclear		9.25491	9.16519	9.14527	9.32012	9.06079	9.34335	9.03384	9.25433	9.36019	9.31147	9.30159	9.48543	9.31917	9.12155	9.59641	9.2781	9.62198	9.79253	9.14192	9.23273	9.40154	9.23667	8.97376	9.40815	9.26936	9.20474	9.06623	9.03015	9.02442	9.31425	9.15496	9.01415	9.09984	9.37892	8.68542	9.32936	8.93856	9.11241	9.12936	9.11163	8.97363
chr17	35512734	35516824	17344336	NM_001163763 // Tcf19 // transcription factor 19 // 17 B1|17 // 106795 /// NM_001163764	Tcf19	NM_001163763	NM_001163763 // RefSeq // Mus musculus transcription factor 19 (Tcf19), transcript vari		10.2633	10.0569	10.1858	10.7292	10.0286	9.87012	10.1661	8.98081	9.81633	10.1271	9.9025	10.603	9.64394	10.183	9.50952	10.6357	10.7112	9.57888	9.78259	10.3895	10.3714	10.1583	9.86123	10.4099	10.3009	10.2766	10.0528	9.76141	10.0059	9.73012	10.2533	9.96526	9.8954	10.2467	9.84312	10.3644	10.1417	10.2058	10.3194	10.2653	10.4475
chr17	13502199	13511193	17333407	---		---	ENSMUST00000160626 // ENSEMBL // havana:lincRNA chromosome:NCBIM37:17:13695065:13704059		5.12787	5.02126	5.22432	4.80527	5.3359	5.2622	5.21194	5.48526	5.1952	5.17618	5.38457	4.95853	5.15619	5.1508	4.81667	4.85495	5.05337	5.23212	5.21611	4.92794	5.48813	5.36186	5.25979	4.99109	5.03536	5.16632	5.23373	5.31977	5.07994	4.94626	4.92668	5.17749	5.2227	5.00409	5.30382	5.48026	5.23558	5.07631	5.07663	5.38147	4.66181
chr17	13096660	13098472	17341000	NR_024558 // Gm11166 // predicted gene 11166 // 17 A1|17 // 625850	Gm11166	NR_024558	NR_024558 // RefSeq // Mus musculus predicted gene 11166 (Gm11166), non-coding RNA. //		5.78749	5.26484	5.45701	5.45748	5.86356	5.65115	5.68487	6.01786	5.72467	5.06429	5.56498	5.76896	5.75937	5.53553	5.66144	5.43257	5.60315	5.78956	5.34384	5.58747	6.09737	5.44102	5.8657	5.72277	5.41933	5.58002	5.58559	5.63407	5.18483	5.61893	5.71752	5.78901	5.50716	5.42236	5.85538	5.07016	5.65008	5.77141	5.22401	5.78758	5.48467
chr17	24470473	24471602	17334262	NM_025954 // Pgp // phosphoglycolate phosphatase // 17 A3.3|17 // 67078 /// ENSMUST0000	Pgp	NM_025954	NM_025954 // RefSeq // Mus musculus phosphoglycolate phosphatase (Pgp), mRNA. // chr17		10.171	9.56678	9.70646	10.3995	10.1991	10.1432	9.47292	10.0546	10.0062	10.1838	10.1037	10.318	10.0496	9.54457	9.90043	9.7942	10.6168	9.63855	10.025	9.89834	9.83197	10.1402	9.37844	10.1306	8.76139	9.39996	9.49506	9.70636	9.38637	9.96041	9.66038	9.00276	10.0981	9.64725	9.50148	9.75895	9.24328	9.81834	9.92321	9.96574	9.47065
chr17	6954965	6961156	17340646	NM_147155 // Tagap1 // T cell activation GTPase activating protein 1 // 17 A1|17 // 380	Tagap1	NM_147155	NM_147155 // RefSeq // Mus musculus T cell activation GTPase activating protein 1 (Taga		5.33448	6.08025	5.84247	6.12119	5.67313	5.55602	5.8055	5.35032	5.25789	5.358	5.79861	5.88308	5.37577	5.59694	4.79857	5.03757	6.11745	5.35163	5.52982	5.52283	5.44866	4.74312	5.52739	5.78659	5.74993	5.64766	5.94356	5.35547	5.5364	6.07367	5.28684	6.35438	5.56264	5.70343	6.42216	6.30979	5.27826	5.59116	5.83858	5.92574	5.85795
chr17	26554254	26561496	17342650	---		---	ENSMUST00000011196 // ENSEMBL // cdna:known chromosome:NCBIM37:17:26691199:26698441:-1		5.06074	4.83714	5.10377	4.7873	5.37105	5.37559	5.03662	5.14762	4.91323	4.89909	5.4185	4.80053	5.24726	5.06617	4.86516	4.57715	5.48259	5.20153	5.11703	5.06858	4.99199	5.11017	4.87371	4.76209	5.01366	4.93297	4.90689	4.92781	4.77133	4.77769	4.97927	5.13724	4.98895	4.74556	5.19275	4.92485	5.17278	4.97613	4.72487	5.37103	4.98368
chr17	27630422	27636629	17342761	ENSMUST00000114881 // Rps10 // ribosomal protein S10 // 17|17 B1 // 67097 /// NM_025963	Rps10	ENSMUST00000114881	ENSMUST00000114881 // ENSEMBL // cdna:known chromosome:NCBIM37:17:27767369:27773574:-1		7.71487	7.73405	7.53513	7.65177	7.93451	7.63474	7.57596	7.6845	7.7625	7.81814	7.43713	7.60961	7.68155	7.53438	7.86763	7.3684	8.02564	7.5469	7.78589	7.6765	7.74033	7.51988	7.72693	7.68971	7.52993	7.77896	7.72182	7.76669	7.81709	7.42447	7.41484	7.33989	7.7679	7.59451	7.97565	7.64401	7.61929	7.85991	7.92608	7.98425	7.3893
chr17	17887824	17971677	17333731	NM_008039 // Fpr2 // formyl peptide receptor 2 // 17 A3.2|17 // 14289 /// ENSMUST000000	Fpr2	NM_008039	NM_008039 // RefSeq // Mus musculus formyl peptide receptor 2 (Fpr2), mRNA. // chr17 //		3.88508	4.10842	3.53796	4.27442	6.01268	3.5206	3.92585	3.54665	3.75659	3.66334	3.75187	4.41123	4.02487	3.65796	4.75921	3.31158	4.08358	4.69723	3.80663	5.91643	4.10043	3.31719	3.62215	4.01844	3.99573	3.76198	5.3512	4.60646	3.70336	4.13238	4.61329	4.81993	3.60825	4.58662	3.86943	3.73002	4.26556	2.95533	3.47959	3.43946	3.11579
chr17	25786580	25790513	17334764	NM_001165929 // Ccdc78 // coiled-coil domain containing 78 // 17 A3.3|17 // 381077 ///	Ccdc78	NM_001165929	NM_001165929 // RefSeq // Mus musculus coiled-coil domain containing 78 (Ccdc78), mRNA.		5.96037	5.8964	5.80083	5.56102	5.9502	5.85207	5.98524	6.1815	5.74637	5.91448	6.01948	5.84942	6.00121	5.87744	5.67675	5.61956	6.08359	5.92359	5.62877	5.65124	5.82929	5.6902	5.69912	5.64681	5.71304	5.95445	5.86347	5.79801	6.00643	5.54407	5.87957	5.95604	6.04487	6.02623	5.87127	5.80331	5.84033	6.07361	5.95065	5.83202	5.43219
chr17	17970458	17971677	17333739	NM_008042 // Fpr3 // formyl peptide receptor 3 // 17 A3.2|17 // 14294 /// ENSMUST000000	Fpr3	NM_008042	NM_008042 // RefSeq // Mus musculus formyl peptide receptor 3 (Fpr3), mRNA. // chr17 //		3.90639	4.43403	4.12706	4.30467	4.28077	4.23821	4.2421	4.25702	4.26587	4.35114	4.48104	4.27008	4.25358	4.34962	4.15597	3.9825	4.21318	4.25541	4.26954	4.65686	4.33224	4.7407	4.26836	4.321	4.23926	3.94808	4.52072	4.39767	4.51929	4.23551	4.40326	4.35232	4.41337	4.51067	4.37419	4.33605	4.42541	4.19705	4.18029	4.42247	4.05771
chr17	33810520	33822918	17336175	NM_030697 // Kank3 // KN motif and ankyrin repeat domains 3 // 17 B1|17 18.0 cM // 8088	Kank3	NM_030697	NM_030697 // RefSeq // Mus musculus KN motif and ankyrin repeat domains 3 (Kank3), mRNA		6.91889	7.8938	7.4858	7.069	7.14673	7.1264	7.18962	7.00813	7.19275	7.77815	7.49647	7.30254	7.34383	7.10226	7.29797	6.73308	7.34501	7.40578	7.38001	7.40901	7.27772	7.60741	7.59069	7.91642	7.13291	7.64809	7.50596	7.42664	7.21694	7.01473	7.32312	7.36226	7.51937	7.02013	7.34506	7.33126	7.46653	7.31509	7.46473	7.67546	7.53675
chr17	35567450	35568952	17337202	ENSMUST00000044326 // 2300002M23Rik // RIKEN cDNA 2300002M23 gene // 17 B1|17 // 69542	2300002M23Rik	ENSMUST00000044326	ENSMUST00000044326 // ENSEMBL // cdna:known chromosome:NCBIM37:17:35704395:35705897:1 g		4.78906	4.91952	4.82729	4.32263	4.97662	4.8039	4.74165	4.83587	4.6747	4.9746	5.38337	4.61248	4.99341	4.58488	4.84928	4.28259	4.79283	4.67919	4.74901	4.54468	4.71265	4.76267	4.57962	4.48052	4.53362	4.75918	4.89182	4.59691	4.87555	4.61364	4.55059	4.98732	5.00449	4.76505	4.90645	4.61262	4.55796	4.96924	4.59809	4.96265	4.65664
chr17	35601549	35650571	17337208	NM_001163194 // Sfta2 // surfactant associated 2 // 17 B1|17 // 433102 /// ENSMUST00000	Sfta2	NM_001163194	NM_001163194 // RefSeq // Mus musculus surfactant associated 2 (Sfta2), mRNA. // chr17		5.25544	5.44356	5.37969	5.47402	5.55321	5.46402	5.53183	5.33382	5.35304	5.3993	5.30705	5.48395	5.59381	5.22009	5.70239	5.16705	5.62153	5.39496	5.2178	5.2861	5.45051	5.38539	5.37704	5.17279	5.24221	5.44693	5.52896	5.22296	5.36373	5.3178	5.35294	5.42518	5.42246	5.36713	5.39048	5.57931	5.21982	5.46169	5.38717	5.36597	5.37362
chr17	28446861	28447148	17335338	---		---	ENSMUST00000157397 // ENSEMBL // ncrna:misc_RNA chromosome:NCBIM37:17:28583806:28584093		5.1153	5.13713	4.87078	4.92565	5.43352	5.27918	5.28937	5.43801	4.95252	4.80004	5.43294	4.69638	5.18271	4.75374	5.12996	4.67964	5.13645	4.77366	5.35737	4.55565	4.81832	4.98399	5.48131	5.15256	4.7664	4.86979	4.92708	4.76971	4.69917	4.76684	5.18375	4.75596	5.3397	4.9494	5.20818	4.74282	5.22415	4.80669	4.83642	5.08979	4.85006
chr17	32321424	32350595	17343387	NM_017476 // Akap8l // A kinase (PRKA) anchor protein 8-like // 17|17 B2 // 54194 /// E	Akap8l	NM_017476	NM_017476 // RefSeq // Mus musculus A kinase (PRKA) anchor protein 8-like (Akap8l), mRN		8.47861	9.19031	9.02111	8.6595	8.86551	9.01663	8.8119	8.69028	8.7758	9.12498	9.00625	9.09484	9.03204	8.81826	9.88227	8.79776	9.15718	9.35437	9.03064	9.01209	8.81612	8.98168	9.17198	8.77076	8.86201	9.13668	8.80449	8.95638	8.58649	8.84632	8.85517	8.87752	8.91716	9.0459	8.61462	8.95129	8.61296	9.08294	8.83785	9.24481	9.3373
chr17	15475721	15498276	17341197	NM_011185 // Psmb1 // proteasome (prosome, macropain) subunit, beta type 1 // 17 A2|17	Psmb1	NM_011185	NM_011185 // RefSeq // Mus musculus proteasome (prosome, macropain) subunit, beta type		9.27584	9.39286	9.4573	9.07416	9.2106	9.12428	9.30575	9.10058	9.45026	9.16759	9.53332	9.11064	9.20921	9.36365	9.44061	9.34132	9.73204	9.35298	9.40362	9.17586	9.04642	9.48296	8.91512	9.40309	8.89683	9.37534	9.32205	8.89599	9.55604	9.21697	9.13017	8.88196	9.43818	9.66732	8.99661	9.09881	8.72843	9.34082	9.53048	9.36384	9.32542
chr17	28896395	28915324	17342943	BC117930 // 4930539E08Rik // RIKEN cDNA 4930539E08 gene // 17 A3.3|17 // 207819 /// NM_	4930539E08Rik	BC117930	BC117930 // GenBank // Mus musculus RIKEN cDNA 4930539E08 gene, mRNA (cDNA clone MGC:14		6.50641	6.13312	6.41401	5.75187	6.56431	6.76264	6.22539	6.70973	6.24711	6.22066	6.57574	6.31757	6.35884	6.09458	6.37496	6.07596	6.40834	6.46456	6.3365	6.26543	6.48662	5.86845	6.12168	6.19963	6.00127	6.14655	6.35924	6.11042	6.39029	6.08331	6.45331	6.47917	6.44434	6.39934	6.37778	6.3409	6.30464	6.26255	6.03403	6.4119	6.37809
chr17	32452723	32493320	17335936	NM_177307 // Cyp4f39 // cytochrome P450, family 4, subfamily f, polypeptide 39 // 17 B1	Cyp4f39	NM_177307	NM_177307 // RefSeq // Mus musculus cytochrome P450, family 4, subfamily f, polypeptide		4.71193	4.6582	4.52044	4.40419	4.61592	4.6842	4.74953	4.86365	5.07082	4.29815	4.60621	4.54346	4.64385	4.3473	4.47635	4.23835	4.60804	4.65834	4.62831	4.3146	5.07948	4.42859	5.02308	4.56959	4.41347	4.27776	4.65363	4.70208	4.57198	4.64797	4.6004	4.42384	4.63481	4.96009	4.76786	4.47673	4.63008	4.55219	4.43139	4.538	4.30121
chr17	24718116	24721929	17334395	NM_008503 // Rps2 // ribosomal protein S2 // 17 A3.3|17 // 16898 /// ENSMUST00000152407	Rps2	NM_008503	NM_008503 // RefSeq // Mus musculus ribosomal protein S2 (Rps2), mRNA. // chr17 // 100		7.94883	8.04807	7.96047	8.09494	8.03483	7.92957	7.88224	7.92284	7.78333	8.06937	7.99259	7.85755	8.10793	7.77749	7.97882	7.82688	7.99151	8.07273	7.79604	7.57994	7.54221	7.82326	7.76909	7.69409	7.38479	7.8661	7.90528	7.74727	8.01868	7.91767	7.87507	7.99274	8.21519	7.87881	7.98246	8.00092	7.98444	8.01606	7.98975	8.00559	7.54041
chr17	23704488	23722783	17341551	---		---	ENSMUST00000062827 // ENSEMBL // cdna:known chromosome:NCBIM37:17:23841455:23859751:-1		5.50803	5.26378	5.2913	5.47249	5.34151	5.24007	5.21714	5.43664	5.24628	5.13411	5.7177	5.55653	5.47747	5.34613	5.189	5.4339	5.77651	5.42319	5.11397	5.31965	5.02605	5.16408	5.44912	5.11745	5.30588	5.31777	5.44398	5.09852	5.41712	5.49675	5.36713	5.38133	5.30005	5.36712	5.71356	4.76483	5.77911	5.34686	5.22013	5.17385	5.24534
chr17	3573082	3576089	17332734	XM_003085118 // Gm19404 // predicted gene, 19404 // --- // 100502833	Gm19404	XM_003085118	XM_003085118 // RefSeq // PREDICTED: Mus musculus predicted gene, 19404 (Gm19404), mRNA		3.91389	3.95557	3.73155	3.70167	4.01436	4.19618	4.03656	4.06615	3.87202	3.95722	4.0732	3.81133	3.97634	3.83117	4.20871	4.11829	3.78765	3.96464	3.93838	3.78927	4.02027	3.85548	3.86215	4.14837	3.90354	4.32824	3.81152	3.82518	3.98254	4.16183	3.88344	3.84984	3.78427	3.67196	4.29655	3.74734	3.90712	4.04156	3.78935	4.00923	4.05854
chr17	7429284	7430201	17340671	---		---	ENSMUST00000171673 // ENSEMBL // cdna:known chromosome:NCBIM37:17:7633634:7634551:-1 ge		6.71739	6.31423	6.74217	7.57809	7.51189	6.6397	6.56711	6.77318	6.67076	6.42771	6.77164	7.02933	6.73071	6.68436	6.29119	6.60251	6.53138	7.42448	6.85225	8.01563	7.18962	6.56332	6.76986	6.79406	6.69698	6.20738	7.05896	6.53025	6.27802	6.60076	6.98284	6.58842	6.97772	7.0114	7.17082	6.43285	6.86749	6.43985	6.54642	6.79343	6.5225
chr17	31179265	31198975	17343181	NM_001163776 // Tmprss3 // transmembrane protease, serine 3 // 17 A3.3|17 // 140765 ///	Tmprss3	NM_001163776	NM_001163776 // RefSeq // Mus musculus transmembrane protease, serine 3 (Tmprss3), tran		5.29507	4.94722	5.07953	5.05117	5.41067	5.23297	5.2053	5.30351	4.81651	5.24761	5.29354	5.20042	5.14474	5.35866	5.49512	5.11992	5.21253	5.34617	5.27375	5.18361	5.37345	5.25499	5.3067	5.11071	5.133	5.262	5.27983	4.98437	4.88211	5.08823	5.26389	5.28739	5.13492	5.24326	5.20139	4.98175	5.16353	5.27335	5.09096	5.35996	5.30843
chr17	25830636	25833361	17342392	NM_028101 // Jmjd8 // jumonji domain containing 8 // 17|17 B1 // 72106 /// ENSMUST00000	Jmjd8	NM_028101	NM_028101 // RefSeq // Mus musculus jumonji domain containing 8 (Jmjd8), mRNA. // chr17		8.35437	8.39645	8.32847	8.45898	8.203	8.33333	8.27697	8.52328	8.24615	8.21267	8.38208	8.57506	8.6248	8.40555	8.54906	8.44092	8.82053	8.51565	8.39172	8.37609	8.21964	8.58008	8.2744	8.48121	8.09273	8.32917	8.39432	8.14252	8.56986	8.0537	8.49553	8.09685	8.69486	8.55788	8.16261	8.55226	8.1535	8.4976	8.56913	8.42864	8.00235
chr17	27530067	27530478	17335127	---		---	ENSMUST00000119573 // ENSEMBL // cdna:pseudogene chromosome:NCBIM37:17:27667012:2766735		11.1641	10.9193	11.1708	10.2493	11.2283	10.6253	11.1713	11.5163	11.5739	11.3468	10.9829	10.881	11.1173	10.9063	11.3477	10.5064	11.2758	10.9022	11.4592	11.3609	11.7982	10.5809	11.0961	11.3086	11.0896	11.1913	11.3641	11.2389	11.0702	11.2586	11.2452	10.9181	11.191	10.9537	11.1625	11.2909	11.1674	11.366	11.6491	11.2447	11.1208
chr17	4119446	4122102	17340478	NR_045462 // 4930548J01Rik // RIKEN cDNA 4930548J01 gene // 17|17 // 78043	4930548J01Rik	NR_045462	NR_045462 // RefSeq // Mus musculus RIKEN cDNA 4930548J01 gene (4930548J01Rik), non-cod		3.72823	3.63241	3.75353	4.49335	3.92639	3.78535	3.87426	3.66831	4.1632	3.52925	3.51446	3.65235	3.74204	3.81454	4.16015	4.1657	3.63531	3.93798	3.65461	3.83251	3.66393	4.00017	3.61894	3.48938	3.6283	3.76189	3.65409	3.85467	3.73999	3.72643	3.72932	3.61707	3.72035	3.75184	3.7163	4.19203	3.6673	3.87991	3.70678	3.69015	3.90218
chr17	14058005	14059531	17341063	ENSMUST00000172090 // Gm7358 // predicted gene 7358 // 17 A2|17 // 664831 /// ENSMUST00	Gm7358	ENSMUST00000172090	ENSMUST00000172090 // ENSEMBL // cdna:known chromosome:NCBIM37:17:14195012:14196538:-1		3.57271	3.50515	3.28669	3.80612	3.83832	3.65286	3.31276	3.59663	3.57244	3.57299	3.59526	3.1858	3.50911	3.52026	3.859	3.61854	3.4207	3.4806	3.43625	3.80567	3.2731	3.43786	3.90497	3.75018	3.5958	3.15668	3.4274	3.64037	3.62084	3.57366	3.5288	3.48694	3.66141	3.52112	3.61019	3.54861	3.77983	3.32732	3.47858	3.75786	3.09839
chr17	27342460	27344832	17335124	AK138223 // Gm10505 // predicted gene 10505 // 17 A3.3|17 // 100038429 /// XR_140413 //	Gm10505	AK138223	AK138223 // GenBank HTC // Mus musculus adult male hypothalamus cDNA, RIKEN full-length		4.91186	5.52577	5.19802	6.47763	5.22684	5.30817	5.22558	5.24461	4.82972	5.51031	5.52263	5.05451	5.60007	5.04882	5.39196	5.11008	5.57631	5.1494	5.11215	4.46183	5.11805	5.35759	5.03529	4.89746	4.84935	4.94181	5.00677	4.95275	5.03813	5.41032	4.76931	5.05013	5.48952	5.00059	5.3038	5.2108	5.08373	5.30959	5.21708	5.61376	5.20277
chr17	33215261	33216351	17343550	NM_001199062 // Gm4461 // predicted gene 4461 // 17 B1|17 // 100043474 /// ENSMUST00000	Gm4461	NM_001199062	NM_001199062 // RefSeq // Mus musculus predicted gene 4461 (Gm4461), mRNA. // chr17 //		3.20505	3.40646	3.21137	3.42757	3.42717	3.22273	3.37017	3.11121	3.15844	3.26417	3.5407	3.44828	3.30641	3.67474	3.58025	3.65322	3.13891	3.42444	3.28022	3.3896	3.36197	3.61001	3.39674	3.26719	3.27777	3.29612	3.31718	3.23252	3.31694	3.08365	3.4606	3.54471	3.62208	3.59004	3.2372	3.53691	3.56603	3.36127	3.34524	3.42251	3.30371
chr17	34601091	34603690	17343873	ENSMUST00000015622 // Rnf5 // ring finger protein 5 // 17 B1|17 18.75 cM // 54197 /// N	Rnf5	ENSMUST00000015622	ENSMUST00000015622 // ENSEMBL // cdna:known chromosome:NCBIM37:17:34738036:34740635:-1		10.0166	9.81393	10.136	10.1854	9.8908	9.50735	9.94211	10.5161	10.2201	9.58081	9.55224	10.4145	9.14055	9.83395	9.36686	10.2273	10.4905	9.5363	9.83085	10.0417	10.0524	9.85064	9.66698	10.3255	10.1427	10.1602	9.71759	9.81969	9.73517	10.1877	10.0733	9.65652	9.82226	10.0219	9.99413	10.1729	9.79533	10.2565	9.87656	9.62995	10.0639
chr17	31612623	31637199	17343227	ENSMUST00000067801 // Cbs // cystathionine beta-synthase // 17 A-C|17 17.4 cM // 12411	Cbs	ENSMUST00000067801	ENSMUST00000067801 // ENSEMBL // cdna:known chromosome:NCBIM37:17:31749568:31774144:-1		7.6994	9.93801	7.57571	7.52961	8.21956	7.83786	8.25054	9.7185	8.51337	9.37202	8.23009	7.91415	8.33323	7.25224	8.51031	7.84878	7.86165	8.07782	8.50909	8.99779	8.17326	9.20396	9.16056	8.28751	8.15833	9.01431	8.46374	9.28882	9.62264	8.83724	7.17992	9.21266	7.80361	8.08444	8.3543	7.26829	7.0335	8.11449	8.18076	9.43836	6.89609
chr17	29057474	29078961	17342996	NR_036469 // Gm16197 // predicted gene 16197 // 17|17 15.04 cM // 100504267 /// HM21088	Gm16197	NR_036469	NR_036469 // RefSeq // Mus musculus predicted gene 16197 (Gm16197), non-coding RNA. //		6.75593	6.97468	7.22573	7.03047	7.43632	7.10153	6.88933	6.82903	6.59748	6.70313	7.1498	7.08065	7.11233	6.85086	6.87018	6.52287	6.95069	6.99462	6.93994	6.78411	6.62928	6.71567	6.87255	6.7967	6.48138	6.65241	6.85114	6.855	7.05596	6.36488	6.91364	6.89419	6.94993	6.92712	6.95871	6.95594	6.75823	6.98609	7.1634	7.21055	6.31249
chr17	35506032	35510777	17337155	NM_001252452 // Pou5f1 // POU domain, class 5, transcription factor 1 // 17 B1|17 19.23	Pou5f1	NM_001252452	NM_001252452 // RefSeq // Mus musculus POU domain, class 5, transcription factor 1 (Pou		5.99428	6.29629	5.98689	6.19269	6.13797	6.0598	6.13202	6.13712	5.9697	5.981	6.05179	6.07849	6.27532	5.91757	6.06408	5.70165	6.03355	6.00213	6.11752	5.89145	5.98699	6.07142	6.09622	5.88831	5.90184	6.12665	6.00894	5.84373	6.11907	6.05899	5.92739	6.12793	5.9632	5.89416	6.2789	5.99253	6.1792	5.88405	5.96772	6.14782	6.12603
chr17	28271708	28273163	17335308	NR_045427 // 1810013A23Rik // RIKEN cDNA 1810013A23 gene // 17 A3.3|17 // 69050 /// ENS	1810013A23Rik	NR_045427	NR_045427 // RefSeq // Mus musculus RIKEN cDNA 1810013A23 gene (1810013A23Rik), non-cod		6.03588	6.40385	6.53761	6.26736	6.70256	6.43698	6.49118	7.12839	6.96189	6.66047	6.6682	6.37661	6.17166	6.16761	6.39811	6.15302	6.66902	6.29625	6.58797	6.49552	6.90691	6.56364	6.40727	6.55193	6.10975	6.39419	6.4581	5.91385	5.96223	6.66628	6.68074	6.33736	6.34707	6.83128	6.10746	6.25629	5.84488	6.09516	6.52467	6.10719	6.19149
chr17	8038508	8101289	17340712	NM_001033442 // Gm1604b // predicted gene 1604b // 17 A1|17 // 381059 /// ENSMUST000000	Gm1604b	NM_001033442	NM_001033442 // RefSeq // Mus musculus predicted gene 1604b (Gm1604b), mRNA. // chr17 /		6.37544	6.66034	6.34042	6.84336	6.17349	6.92042	6.56449	6.53312	6.15768	6.56719	6.72037	6.54458	6.65137	6.3986	6.77112	6.17538	6.31909	6.93834	6.41612	6.42524	6.27939	6.8479	6.48304	6.24148	6.18156	6.32054	6.28873	6.54692	6.28581	6.15353	6.53895	6.53315	6.29014	6.41932	6.73082	6.07102	6.61106	6.51375	6.5601	6.53092	6.62401
chr17	13493687	13518144	17333402	XM_001475874 // Gm16050 // predicted gene 16050 // 17 A1|17 // 667384	Gm16050	XM_001475874	XM_001475874 // RefSeq // PREDICTED: Mus musculus predicted gene 16050 (Gm16050), mRNA.		7.00882	7.11346	6.99191	7.36246	7.04698	7.41611	7.34438	7.44393	6.62149	7.48479	7.42165	7.17827	7.32739	7.06055	7.11375	6.96882	7.05898	7.36295	7.28082	7.46066	7.10006	7.26184	7.20022	7.02554	7.25785	7.10176	7.29141	6.85348	7.20645	6.72962	7.10769	6.75663	7.47266	6.96389	7.39649	7.13641	7.08877	7.11176	7.06707	7.07595	6.96647
chr17	32369305	32378445	17335929	AB012265 // Wiz // widely-interspaced zinc finger motifs // 17|17 B2 // 22404 /// AB012	Wiz	AB012265	AB012265 // GenBank // Mus musculus mRNA for wizL, complete cds. // chr17 // 100 // 100		5.26955	5.28587	5.11482	5.53049	5.12434	5.53447	4.96883	4.99238	5.35868	4.9241	5.30181	4.91406	5.35582	4.87958	5.37136	5.3329	5.14266	4.85336	4.98015	4.91839	4.99569	5.34746	5.10069	5.0362	5.09808	5.15846	5.18532	4.83381	5.35246	5.39585	5.39734	4.81738	5.06042	4.96514	4.7532	5.37147	4.83059	4.83995	4.944	5.11897	5.28613
chr17	13401493	13404191	17341026	---		---	ENSMUST00000115650 // ENSEMBL // cdna:known chromosome:NCBIM37:17:13594359:13597057:-1		4.62961	5.17728	5.0872	6.2609	4.90686	4.79958	4.46931	4.70803	4.37846	5.2921	5.27094	4.6233	4.90874	5.28849	5.06412	4.59247	4.87563	4.706	5.1491	5.00246	4.7121	4.94923	5.30988	4.67423	4.96297	4.77787	4.81666	4.44167	4.95375	4.25967	5.34824	4.57123	5.11895	4.23623	4.97979	4.75719	5.18742	3.88286	4.04933	5.10233	5.0734
chr17	34640846	34643977	17343915	---		---	ENSMUST00000174600 // ENSEMBL // havana:lincRNA chromosome:NCBIM37:17:34777791:34780922		4.33529	4.74794	4.53954	5.46356	4.35545	4.41203	4.68144	4.5665	5.155	5.45867	4.16713	4.62623	4.58052	4.14634	4.5402	5.08088	4.44756	4.49204	4.57464	4.42147	4.76935	4.97023	4.69357	4.77169	4.93656	4.89131	4.79181	4.65055	4.50993	4.94566	4.9484	5.05337	4.68589	4.76972	4.93865	4.69204	5.12923	4.80666	4.89332	4.39964	4.55948
chr17	22006510	22007301	17341387	---		---	ENSMUST00000075018 // ENSEMBL // cdna:known chromosome:NCBIM37:17:22143477:22144268:-1		3.37863	3.28934	3.32239	3.33692	3.24021	3.30332	3.2808	3.13615	3.47134	3.36729	3.0867	3.35734	3.20143	3.16116	3.22001	3.33056	3.2526	2.99776	3.34614	3.22833	3.62645	3.04983	2.99687	3.49022	3.23743	3.21834	3.24033	3.29178	3.31922	3.24241	3.38244	3.27054	3.28629	3.42408	3.23805	3.1712	3.23821	3.47539	3.40791	3.35415	3.34515
chr17	35699203	35699309	17344434	---		---	ENSMUST00000083840 // ENSEMBL // ncrna:snRNA chromosome:NCBIM37:17:35836148:35836254:-1		5.16868	5.67881	6.41388	5.23822	6.22365	6.10099	5.92485	5.65698	6.65969	5.65603	6.10551	6.20751	6.01976	6.48174	6.45978	5.64888	6.53033	5.97159	5.92338	5.95309	6.30532	6.64979	5.46186	5.74501	6.0935	6.24938	6.41383	6.33455	5.68056	6.17107	6.58197	5.53267	6.99166	6.55241	6.37936	6.4201	6.41311	6.11651	6.22588	5.17774	6.76673
chr17	33951999	33956001	17343692	ENSMUST00000174620 // Rps18 // ribosomal protein S18 // 17 B1|17 18.42 cM // 20084 ///	Rps18	ENSMUST00000174620	ENSMUST00000174620 // ENSEMBL // cdna:known chromosome:NCBIM37:17:34089214:34092598:-1		5.02274	5.05797	5.03082	5.46344	5.12863	4.9792	5.00751	4.88611	4.92223	5.26734	4.77928	5.0685	4.85136	4.74899	4.87928	4.80987	5.34571	5.30808	5.20574	5.01719	4.72298	4.85298	4.76242	5.11293	4.59257	5.0238	4.96015	4.75692	4.82411	4.8668	5.06726	4.88065	5.17198	4.74482	5.01679	5.1625	4.77226	5.01077	4.94897	5.06992	5.13292
chr17	17703941	17734167	17333696	NM_001104539 // Vmn2r90 // vomeronasal 2, receptor 90 // 17 A3.2|17 // 626942 /// ENSMU	Vmn2r90	NM_001104539	NM_001104539 // RefSeq // Mus musculus vomeronasal 2, receptor 90 (Vmn2r90), mRNA. // c		3.24129	3.56417	3.66559	4.99591	3.55217	3.6933	3.46781	3.56239	3.94226	3.30984	3.4412	3.1928	3.85546	3.31739	3.6755	3.72251	3.55714	3.38323	3.20406	3.38323	3.46573	3.31719	3.269	3.0959	3.46481	3.66245	3.56387	3.43528	3.45323	3.57434	3.6576	3.49025	3.41075	3.18785	3.3499	3.4941	3.4737	3.26624	3.68494	3.71902	3.18447
chr17	17911039	17911947	17341283	XR_105841 // Gm19747 // predicted gene, 19747 // --- // 100503522 /// XR_105841 // Gm19	Gm19747	XR_105841	ENSMUST00000164167 // ENSEMBL // cdna:known chromosome:NCBIM37:17:18048003:18048911:-1		7.24629	7.20145	7.46001	7.35472	7.18279	7.2485	7.48166	7.5677	7.30371	7.24736	7.77264	7.10545	7.07527	7.58746	7.09749	7.43724	7.1096	7.36849	7.19896	7.27249	7.53501	7.34431	7.29801	7.42446	7.11083	7.23919	7.20656	7.22964	7.52503	6.81981	7.53679	7.26376	7.50414	7.30407	7.59108	7.471	7.80497	7.54318	6.87503	7.40463	7.45353
chr17	23824740	23829109	17341625	NM_026305 // Tceb2 // transcription elongation factor B (SIII), polypeptide 2 // 17 A3.	Tceb2	NM_026305	NM_026305 // RefSeq // Mus musculus transcription elongation factor B (SIII), polypepti		10.6667	10.0663	10.0123	10.3343	10.427	9.98109	10.149	9.95089	9.92384	10.0804	9.86837	10.4058	9.8444	10.3448	10.2747	10.5295	10.7322	10.0777	10.2585	10.4244	9.83027	10.2039	9.97479	10.2342	10.3371	10.3088	10.3335	10.1941	10.3325	9.91	10.4423	9.94172	10.1948	10.4098	9.81518	10.3746	10.3151	10.3887	10.4978	10.2518	10.119
chr17	13482553	13554094	17341029	NR_045436 // 2700054A10Rik // RIKEN cDNA 2700054A10 gene // --- // 72578 /// NR_045437	2700054A10Rik	NR_045436	NR_045436 // RefSeq // Mus musculus RIKEN cDNA 2700054A10 gene (2700054A10Rik), transcr		5.75473	6.2171	6.663	5.98694	5.96618	6.23981	6.25583	5.48111	5.66146	5.81963	6.71498	5.69666	6.1796	6.18018	6.49551	6.04038	6.64371	6.27575	6.0103	6.10416	6.07491	7.21536	5.9116	5.98644	5.39696	6.1027	5.78516	5.61531	6.60074	5.58544	5.90717	6.45057	6.09547	6.28997	5.88525	5.78051	5.55869	5.66603	5.99829	5.4204	6.09614
chr17	3519256	3557713	17340449	NM_146074 // Tfb1m // transcription factor B1, mitochondrial // 17 A1|17 // 224481 ///	Tfb1m	NM_146074	NM_146074 // RefSeq // Mus musculus transcription factor B1, mitochondrial (Tfb1m), nuc		9.31814	8.22673	8.99268	8.81366	8.73155	8.62567	8.80286	9.67784	9.44814	8.62122	8.7044	9.29136	8.78265	9.13603	8.09763	9.14206	9.39434	7.69563	8.60988	9.06362	9.86678	9.15041	8.69012	9.90374	9.36213	9.17445	9.43433	8.97023	9.42125	9.65897	9.46206	7.79101	8.98476	9.02037	8.96413	9.5962	8.91679	8.90723	9.06745	8.26892	9.07893
chr17	25489875	25497288	17342292	NM_011425 // Sstr5 // somatostatin receptor 5 // 17 A3.3|17 13.0 cM // 20609 /// ENSMUS	Sstr5	NM_011425	NM_011425 // RefSeq // Mus musculus somatostatin receptor 5 (Sstr5), transcript variant		5.74887	5.87379	5.71964	6.06296	5.95295	5.62175	5.96753	5.84995	5.76491	6.06651	5.75698	5.81912	5.62167	5.54992	5.90897	5.75869	5.78513	6.1276	5.76332	6.07584	5.85038	5.81346	5.96585	5.43297	5.82443	5.64209	5.35574	5.7211	5.86128	5.9915	5.67893	5.91457	5.81699	5.84037	5.80348	5.65383	5.71964	5.91383	5.77126	5.6569	5.76173
chr17	15396202	15433581	17333553	NR_033586 // Fam120b // family with sequence similarity 120, member B // 17 A2|17 // 67	Fam120b	NR_033586	NR_033586 // RefSeq // Mus musculus family with sequence similarity 120, member B (Fam1		9.11535	8.59903	8.99268	8.98825	8.92936	8.86072	8.89772	9.16898	8.90111	8.33022	8.88496	8.99499	8.76829	8.83341	8.53222	9.43165	9.31736	9.0161	8.65661	8.84923	9.16179	9.05183	8.69758	9.11111	9.04815	8.84228	8.85339	8.83545	8.81984	9.2784	9.25063	8.7814	8.74567	9.33535	8.58576	9.05655	8.95751	9.13699	8.58485	8.55385	9.35378
chr17	35517100	35531015	17337169	NM_146248 // Cchcr1 // coiled-coil alpha-helical rod protein 1 // 17 B1|17 // 240084 //	Cchcr1	NM_146248	NM_146248 // RefSeq // Mus musculus coiled-coil alpha-helical rod protein 1 (Cchcr1), m		7.79138	8.27527	8.31527	8.12003	8.22017	8.42082	7.9981	7.27919	8.29187	8.17349	8.45805	8.57426	8.43584	8.03872	8.77363	7.94079	8.3249	8.5668	8.29151	8.35659	8.57748	8.49793	7.9086	8.32316	7.8951	8.30476	7.98991	7.89379	8.04946	7.86717	8.13255	8.09273	8.20035	8.06603	8.14831	8.31952	8.12454	8.14337	8.24581	8.35366	8.21295
chr17	29526009	29549593	17343065	NM_001162901 // Tmem217 // transmembrane protein 217 // 17 A3.3|17 // 71138 /// ENSMUST	Tmem217	NM_001162901	NM_001162901 // RefSeq // Mus musculus transmembrane protein 217 (Tmem217), transcript		5.25381	5.15052	5.35909	4.91962	5.17609	4.97218	5.58378	5.31044	5.18672	5.96516	5.14267	5.1817	5.10615	5.54951	5.08994	5.0869	5.19859	4.89557	5.2297	5.03195	4.98173	5.051	5.23083	5.24942	5.15187	5.25605	5.84856	5.08492	5.22192	4.86413	5.91531	5.2908	5.4722	5.30761	5.22238	5.42584	5.22899	5.17187	5.39774	5.02287	5.59128
chr17	21488988	21510477	17333932	NM_013843 // Zfp53 // zinc finger protein 53 // 17 A3.2|17 9.9 cM // 24132 /// BC046328	Zfp53	NM_013843	NM_013843 // RefSeq // Mus musculus zinc finger protein 53 (Zfp53), mRNA. // chr17 // 1		7.42391	7.77136	7.12001	6.85981	7.35218	7.30214	7.2564	7.35057	6.99835	7.24045	7.33125	7.58245	7.26026	7.88498	6.9234	7.30509	7.70671	7.36248	7.42131	7.75434	7.35541	7.05189	7.14935	7.43971	7.97699	7.3035	7.61425	7.57317	7.44077	7.00107	7.50455	7.22904	7.05174	7.65135	6.96409	7.48211	7.58992	7.44065	7.59698	7.33043	7.56796
chr17	32196272	32284722	17343344	NM_020508 // Brd4 // bromodomain containing 4 // 17 B1|17 20.0 cM // 57261 /// ENSMUST0	Brd4	NM_020508	NM_020508 // RefSeq // Mus musculus bromodomain containing 4 (Brd4), transcript variant		9.18022	9.23366	9.05558	8.97688	9.5289	9.4843	9.2269	9.17603	9.22397	9.36578	9.18688	9.3336	9.46067	9.25609	10.0232	9.36028	9.36918	9.65248	9.26475	9.33264	9.32998	9.26117	9.26055	9.10375	9.36085	9.33068	9.19349	9.16414	9.24446	8.84613	9.05251	9.34463	9.18965	9.62624	9.29097	9.11619	9.23428	9.01889	9.31759	9.51213	9.30884
chr17	19362135	19394590	17333797	NM_001104551 // Vmn2r99 // vomeronasal 2, receptor 99 // 17 A3.2|17 // 665376 /// ENSMU	Vmn2r99	NM_001104551	NM_001104551 // RefSeq // Mus musculus vomeronasal 2, receptor 99 (Vmn2r99), mRNA. // c		3.33966	3.25965	3.97099	4.0041	3.28035	3.37668	3.25348	3.49261	3.35751	3.73073	3.60909	3.57576	3.36351	3.25916	3.33315	3.0261	3.81333	3.27918	3.12724	3.43033	3.44463	3.9002	3.1675	3.25982	3.14045	3.26943	3.58265	3.19309	3.56909	3.64667	3.38383	3.24615	3.22838	3.29109	3.11602	3.42247	3.21074	3.55354	3.34191	3.33588	3.16973
chr17	31944769	32034508	17343278	NM_028902 // Hsf2bp // heat shock transcription factor 2 binding protein // 17 B1|17 //	Hsf2bp	NM_028902	NM_028902 // RefSeq // Mus musculus heat shock transcription factor 2 binding protein (		4.93744	5.14686	5.03606	4.80577	5.00702	5.01411	5.19997	5.21535	5.56707	5.26585	4.84242	5.09139	5.03027	5.19515	5.0021	4.63296	5.25928	5.08129	5.04164	4.91613	5.21417	4.52031	5.23277	4.86908	4.77689	5.01847	5.11973	5.03198	4.98113	4.72306	5.3632	5.23384	5.04816	4.99592	5.11322	5.16813	5.15529	5.08151	5.12167	5.03132	4.76864
chr17	26138686	26195811	17334869	NM_009733 // Axin1 // axin 1 // 17 A3.3|17 11.8 cM // 12005 /// ENSMUST00000074370 // A	Axin1	NM_009733	NM_009733 // RefSeq // Mus musculus axin 1 (Axin1), transcript variant 2, mRNA. // chr1		9.10478	9.23938	9.07092	9.42376	9.07261	9.25297	9.06175	8.9159	9.11147	9.15112	8.99883	9.13833	9.19447	8.97022	9.14493	9.16256	9.35234	8.92984	9.08769	9.21509	9.2689	8.99435	8.95775	9.17223	9.00436	9.02155	9.30029	8.83263	9.00255	8.84512	9.08384	9.17091	9.24462	9.36625	9.01165	9.12823	9.02137	9.08578	9.21323	9.14094	9.13255
chr17	23290934	23312313	17341470	AB540945 // Vmn2r114 // vomeronasal 2, receptor 114 // 17 A3.3|17 // 666002 /// ENSMUST	Vmn2r114	AB540945	AB540945 // GenBank // Mus musculus domesticus V2Rp3 mRNA for vomeronasal 2 receptor p3		3.33235	3.36431	3.34939	4.03566	3.07228	3.18944	3.24864	3.20106	3.12995	3.83923	3.48113	3.25043	3.55108	3.47186	3.73328	3.20094	3.27487	3.18988	2.9228	3.21453	3.25582	3.23517	3.14998	3.25988	3.26456	3.43913	3.32481	3.35075	3.69136	3.60818	3.42842	3.39818	3.56963	3.32322	3.16254	3.50047	3.78436	3.28968	3.34864	3.49354	3.5392
chr17	28351515	28365182	17342847	NM_021478 // Tulp1 // tubby like protein 1 // 17 A3.3|17 // 22157 /// ENSMUST0000004181	Tulp1	NM_021478	NM_021478 // RefSeq // Mus musculus tubby like protein 1 (Tulp1), mRNA. // chr17 // 100		6.01084	6.0053	6.01407	6.50959	6.00967	6.15515	6.3965	6.01272	6.04078	5.99981	6.18438	5.97464	5.90931	6.10735	6.66331	5.76155	6.29968	6.13337	5.96151	6.30381	5.92665	6.01575	5.95841	6.16676	6.10679	5.96196	5.96594	6.28839	6.396	6.49761	6.51804	6.43232	5.87797	6.0042	6.20604	6.14822	6.21098	6.05131	5.89407	6.20225	6.22192
chr17	17389943	17395303	17341242	NM_025934 // Riok2 // RIO kinase 2 (yeast) // 17|17 A3.1 // 67045 /// ENSMUST0000002462	Riok2	NM_025934	NM_025934 // RefSeq // Mus musculus RIO kinase 2 (yeast) (Riok2), mRNA. // chr17 // 100		3.99571	4.49355	4.61479	4.54992	4.15139	4.66071	4.19836	4.49698	4.35072	4.41827	4.60215	4.21916	5.03386	4.44937	4.09652	4.63364	4.56704	4.09428	4.58624	4.15161	4.38855	4.03751	4.31869	4.3113	4.32327	4.52529	4.22014	4.25013	3.83012	4.44737	4.46697	4.36742	4.71516	4.35803	4.29056	4.26223	4.75642	4.29483	4.34252	4.27481	3.99056
chr17	13354572	13377223	17333386	NM_001167578 // Tcp10c // t-complex protein 10c // 17 A1|17 // 100041352 /// ENSMUST000	Tcp10c	NM_001167578	NM_001167578 // RefSeq // Mus musculus t-complex protein 10c (Tcp10c), mRNA. // chr17 /		4.84021	4.28958	4.57937	4.96511	4.76201	4.68358	4.71212	4.46124	4.78417	5.04322	4.40214	5.35341	4.68975	4.91795	4.44155	4.07958	5.24399	4.87096	4.15875	4.37681	4.03266	4.39317	4.78159	4.76851	4.18534	4.72113	4.42142	4.68975	5.071	4.53563	4.38801	4.50373	4.53988	5.56089	4.80777	4.4832	4.2893	4.29378	4.90781	4.97961	4.65757
chr17	33929582	33937687	17336245	ENSMUST00000047503 // Rgl2 // ral guanine nucleotide dissociation stimulator-like 2 //	Rgl2	ENSMUST00000047503	ENSMUST00000047503 // ENSEMBL // cdna:known chromosome:NCBIM37:17:34066527:34074632:1 g		9.31151	9.23135	9.24869	9.26136	9.30767	9.1875	9.03419	8.7901	8.94285	9.14411	9.14804	9.45188	8.98266	9.22032	9.58587	9.15609	9.47919	9.53718	9.20331	9.37292	9.12926	9.30058	8.86771	9.04048	8.96386	9.15443	8.85966	8.70328	8.9164	8.92751	9.08311	8.82491	9.21699	9.40639	9.00567	9.24079	9.16254	9.23665	9.0797	9.21451	8.99079
chr17	35149076	35164897	17344251	NM_020027 // Prrc2a // proline-rich coiled-coil 2A // 17 B1|17 19.04 cM // 53761 /// NM	Prrc2a	NM_020027	NM_020027 // RefSeq // Mus musculus proline-rich coiled-coil 2A (Prrc2a), transcript va		9.75535	9.35404	9.32668	9.76644	9.77151	9.76181	9.519	9.76235	9.8032	9.414	9.5898	9.61854	9.6222	9.65888	10.3068	9.83311	9.73598	9.61559	9.4319	9.67116	9.62774	9.64659	9.39428	9.67392	9.82056	9.67697	9.38957	9.48174	9.3062	9.46934	9.38881	9.36489	9.4163	9.82147	9.79227	9.56505	9.501	9.62475	9.45194	9.55861	9.57943
chr17	20208230	20234872	17341305	NM_001104567 // Vmn2r105 // vomeronasal 2, receptor 105 // 17 A3.2|17 // 627743 /// ENS	Vmn2r105	NM_001104567	NM_001104567 // RefSeq // Mus musculus vomeronasal 2, receptor 105 (Vmn2r105), mRNA. //		3.22879	3.29337	3.52605	4.30388	3.61696	3.15235	3.14087	3.35987	3.20983	3.72818	3.44883	3.41535	3.32561	3.4844	2.83951	3.85961	3.74556	3.22928	3.33127	3.20762	3.24335	3.47084	3.43222	3.3862	3.32715	3.69204	3.45545	3.40256	3.54498	3.46446	3.12359	3.47251	3.25566	3.45598	3.42766	3.20895	3.53494	3.39571	3.70929	3.29732	4.01035
chr17	23853159	23858647	17341652	---		---	ENSMUST00000161395 // ENSEMBL // cdna:known chromosome:NCBIM37:17:23990126:23995614:-1		4.19618	4.51651	4.58918	4.66722	4.67135	4.81333	4.71146	4.56183	4.6149	4.33983	4.64054	4.55811	4.46626	4.49834	4.674	4.75673	4.30584	4.62373	4.50611	4.41841	4.64049	4.34609	4.29367	4.58799	4.44194	4.69907	4.61515	4.30123	4.66662	4.36993	4.54081	4.6017	4.99938	4.72145	4.5256	4.34636	4.63243	4.76114	4.23675	4.32936	4.23459
chr17	32621319	32636184	17335983	NM_001100187 // Gm9705 // predicted gene 9705 // 17 B1|17 // 677156 /// ENSMUST00000077	Gm9705	NM_001100187	NM_001100187 // RefSeq // Mus musculus predicted gene 9705 (Gm9705), mRNA. // chr17 //		5.08495	5.26581	5.18735	5.03196	5.2691	4.53054	5.27083	4.83537	5.00715	4.88109	5.45121	4.99287	5.31847	5.47429	5.14989	4.74158	5.66992	4.75356	5.33842	4.89338	5.05986	4.37759	4.95908	5.10871	5.27544	4.78433	5.4043	4.85044	5.06855	5.20945	5.34325	5.04542	5.32153	5.2913	5.38784	4.98455	4.69602	4.88921	5.24468	5.15946	4.9148
chr17	23880876	23882853	17334166	NM_019910 // Dcpp1 // demilune cell and parotid protein 1 // 17 A3.3|17 10.0 cM // 1318	Dcpp1	NM_019910	NM_019910 // RefSeq // Mus musculus demilune cell and parotid protein 1 (Dcpp1), mRNA.		6.11109	5.72767	6.00289	5.6345	6.25528	6.1578	5.71772	6.27077	6.1015	5.91381	5.65426	5.64432	5.94103	6.38096	5.84295	5.05712	6.21547	4.99634	5.76891	4.98992	5.95427	6.10675	5.47328	5.42022	6.12491	5.72182	5.59728	5.90896	5.4628	7.22167	5.95064	6.3157	5.68307	5.9332	5.78832	5.65144	5.95922	5.95485	5.93655	5.74219	5.20823
chr17	24752988	24758684	17334427	NM_001012402 // Hs3st6 // heparan sulfate (glucosamine) 3-O-sulfotransferase 6 // 17 A3	Hs3st6	NM_001012402	NM_001012402 // RefSeq // Mus musculus heparan sulfate (glucosamine) 3-O-sulfotransfera		6.62614	5.72396	6.10024	5.64746	5.98749	6.30083	5.95731	5.89451	5.61831	6.04418	6.28451	5.83811	5.9897	6.14225	6.16772	6.59154	5.98841	6.06941	6.37082	5.87432	5.70348	6.39275	6.10664	5.89801	6.4569	5.87207	5.5059	6.2942	5.69301	6.05858	6.46353	6.12086	6.06002	6.02418	6.63822	6.28078	5.99465	5.79813	5.62807	6.07582	5.76856
chr17	34293073	34305720	17343823	---		---	ENSMUST00000174074 // ENSEMBL // cdna:known chromosome:NCBIM37:17:34430018:34442665:-1		3.93707	3.68534	4.14433	4.2447	4.14404	4.06671	3.87632	4.11686	4.2628	4.23908	3.89886	3.85117	3.72011	3.88383	3.93177	4.39205	3.99803	4.08316	4.02463	3.88083	3.98198	3.983	4.15698	3.75312	3.75491	3.86868	4.05077	3.87298	3.88351	3.89669	3.89882	4.17623	4.16789	3.88554	4.39711	3.89814	4.13461	4.13614	3.79015	3.91635	3.83782
chr17	30923748	30963214	17343160	AK138161 // Gm10503 // predicted gene 10503 // 17 A3.3|17 // 100038436 /// AK138161 //	Gm10503	AK138161	AK138161 // GenBank HTC // Mus musculus adult male hypothalamus cDNA, RIKEN full-length		6.67153	6.83039	6.54951	5.88435	6.71439	6.56576	6.8219	6.77788	6.31656	6.84442	6.64465	6.10665	6.57723	6.61137	6.37838	5.62427	7.03555	6.47584	6.31925	6.13478	6.58788	6.50315	6.53962	6.5871	6.50269	6.88117	6.5258	6.78689	6.73158	6.51759	6.43914	6.8612	6.39629	6.56399	6.6921	6.60592	6.37235	6.78173	6.49784	6.78321	6.19276
chr17	29695977	29717017	17343079	NM_026782 // 1110021J02Rik // RIKEN cDNA 1110021J02 gene // 17 B1|17 // 68597 /// NM_00	1110021J02Rik	NM_026782	NM_026782 // RefSeq // Mus musculus RIKEN cDNA 1110021J02 gene (1110021J02Rik), transcr		8.84667	8.37075	8.38323	8.6815	8.1907	8.15864	8.51431	8.46723	8.22315	8.12144	8.62499	8.52981	8.63857	8.48056	8.58	9.14039	8.88493	8.56936	8.21644	8.54931	8.24409	8.18886	7.88711	8.56345	8.72109	8.44777	8.63439	8.23751	8.46729	8.3431	8.73531	8.40968	8.54261	8.82932	8.67625	8.73278	8.35597	8.63936	8.55855	8.41653	8.94164
chr17	8236043	8257141	17333066	NM_009835 // Ccr6 // chemokine (C-C motif) receptor 6 // 17 A1|17 // 12458 /// ENSMUST0	Ccr6	NM_009835	NM_009835 // RefSeq // Mus musculus chemokine (C-C motif) receptor 6 (Ccr6), transcript		4.4414	4.46193	4.63618	4.70441	4.71703	4.47812	4.68753	4.71019	4.40168	4.58187	4.50264	4.36755	4.74631	4.29444	4.16977	4.42305	4.53012	4.19511	4.6353	4.42261	4.35151	4.43483	4.30659	4.55015	4.32851	4.25746	4.25802	4.28314	4.50226	4.0475	4.54315	4.48967	4.5233	4.41974	4.42999	4.38478	4.57785	4.31892	4.33301	4.33288	4.61988
chr17	35170991	35176068	17344289	NM_019467 // Aif1 // allograft inflammatory factor 1 // 17 B1|17 19.05 cM // 11629 ///	Aif1	NM_019467	NM_019467 // RefSeq // Mus musculus allograft inflammatory factor 1 (Aif1), mRNA. // ch		6.35539	5.80276	6.02749	6.41707	6.1501	5.59202	6.01575	5.91512	6.32254	5.91683	5.95801	6.26713	6.16424	6.52946	6.13197	6.38323	6.63608	5.98671	6.16984	6.71687	6.08269	5.77242	5.94988	6.18211	6.10561	6.10103	6.42558	6.30787	6.47863	6.49557	6.63302	6.57981	6.2485	6.78689	6.0858	5.70321	5.99509	5.86493	5.72868	5.71919	5.9185
chr17	5798657	5803242	17332778	NR_045079 // 3300005D01Rik // RIKEN cDNA 3300005D01 gene // 17 A1|17 // 78512 /// NR_04	3300005D01Rik	NR_045079	NR_045079 // RefSeq // Mus musculus RIKEN cDNA 3300005D01 gene (3300005D01Rik), transcr		5.59398	5.53353	5.63943	5.81323	5.59754	5.58491	5.40585	5.67967	5.55149	5.61465	5.48035	5.26083	5.70646	5.49478	5.2918	5.58029	5.71343	5.74645	5.58226	5.41891	5.58427	5.62101	5.85416	5.35996	5.31398	5.51207	5.67297	5.49153	5.50905	5.11574	5.48777	6.03932	5.46972	5.27855	5.65026	5.45831	5.4598	5.65477	5.39833	5.56479	5.5207
chr17	19660399	19694748	17333819	NM_001104564 // Vmn2r102 // vomeronasal 2, receptor 102 // 17 A3.2|17 // 224572 /// ENS	Vmn2r102	NM_001104564	NM_001104564 // RefSeq // Mus musculus vomeronasal 2, receptor 102 (Vmn2r102), mRNA. //		3.66513	3.40242	3.67092	3.20323	3.55298	3.32072	3.66506	3.23321	3.64582	3.64521	3.40552	3.09224	3.27387	3.66177	3.261	3.36574	3.20329	3.00631	3.33392	3.10181	3.25567	3.06234	3.33849	3.28931	3.5958	3.37313	3.2664	3.47713	3.63353	3.35177	3.79304	3.40053	3.49152	3.36483	3.31791	3.73832	3.27027	3.65089	3.58082	3.0881	3.28383
chr17	9666497	9669704	17340748	NM_001163836 // Pabpc6 // poly(A) binding protein, cytoplasmic 6 // 17 A1|17 // 67543 /	Pabpc6	NM_001163836	NM_001163836 // RefSeq // Mus musculus poly(A) binding protein, cytoplasmic 6 (Pabpc6),		4.13822	4.21969	4.14895	4.41543	4.51202	4.32792	4.32664	4.3098	3.93487	4.1843	4.17192	3.97709	4.07106	4.23199	4.3109	4.04019	4.01124	4.11255	3.97166	4.1566	3.90715	4.09607	4.30188	4.14919	4.09446	4.10123	4.2319	3.87987	4.14712	3.93161	3.94131	4.43449	4.35984	4.0772	4.02801	4.27426	4.47551	4.32866	4.29135	4.22978	4.05157
chr17	27735220	27741492	17335165	---		---	ENSMUST00000156950 // ENSEMBL // cdna:putative chromosome:NCBIM37:17:27872165:27878437:		6.04278	5.89676	5.79042	5.48659	5.8602	6.14673	5.67541	5.7909	5.56974	5.4856	5.99924	5.79043	6.09174	5.82824	5.4766	5.74507	5.92865	5.81549	5.75497	5.70863	5.96913	5.77788	5.87191	5.38033	5.73949	5.90663	6.0121	5.6487	5.91	5.65533	5.84384	6.16841	5.87635	5.86882	6.01739	5.69616	6.00356	5.7465	6.0581	5.96342	5.68932
chr17	20735100	20736126	17333848	NM_134195 // Vmn1r227 // vomeronasal 1 receptor 227 // 17 A3.2|17 // 171229	Vmn1r227	NM_134195	NM_134195 // RefSeq // Mus musculus vomeronasal 1 receptor 227 (Vmn1r227), mRNA. // chr		3.71803	3.34649	3.45466	3.30926	3.56783	3.12874	3.40859	3.53231	3.27043	3.65537	3.06871	3.38925	3.44702	3.19406	3.48622	3.2858	3.83991	3.41994	3.32269	3.46297	3.50838	3.09889	3.65183	3.43003	3.13531	3.20445	3.56381	3.4186	3.52119	3.23193	2.98446	3.19599	3.51074	3.15981	3.42901	3.62099	3.60619	3.10047	3.3471	3.04011	3.34323
chr17	4994332	5347656	17332739	NM_001085355 // Arid1b // AT rich interactive domain 1B (SWI-like) // 17 A1|17 // 23998	Arid1b	NM_001085355	NM_001085355 // RefSeq // Mus musculus AT rich interactive domain 1B (SWI-like) (Arid1b		10.438	10.2788	10.202	10.5171	10.4258	10.6488	10.2575	10.5651	10.8586	10.294	10.4753	10.5772	10.5119	10.2081	11.0768	10.2914	10.7167	10.2431	10.2642	10.2961	10.7229	10.5202	10.4468	10.6229	10.3321	10.314	10.0409	10.2933	10.1462	10.5854	10.2127	10.2681	10.4026	10.4806	10.6052	10.3949	10.1704	10.4237	10.3832	10.3844	10.3503
chr17	32076083	32091423	17343289	NR_027316 // Pdxk-ps // pyridoxal (pyridoxine, vitamin B6) kinase, pseudogene // 17 B1|	Pdxk-ps	NR_027316	NR_027316 // RefSeq // Mus musculus pyridoxal (pyridoxine, vitamin B6) kinase, pseudoge		5.0732	5.13853	5.4945	5.83155	5.09767	5.4817	5.44736	5.52968	4.96505	5.26543	4.78618	5.26446	5.66614	5.51383	4.84089	4.81209	5.20573	5.33717	5.33336	5.19205	5.273	4.98885	5.38127	5.60474	4.92157	5.4467	5.30809	5.40449	5.62832	4.88424	5.4246	5.316	5.1928	5.26677	5.72175	4.97877	5.56092	5.36532	5.72591	5.44095	5.1522
chr17	35320547	35325099	17337089	NM_010390 // H2-Q1 // histocompatibility 2, Q region locus 1 // 17 B1|17 19.14 cM // 15	H2-Q1	NM_010390	NM_010390 // RefSeq // Mus musculus histocompatibility 2, Q region locus 1 (H2-Q1), mRN		5.57858	5.82146	5.80728	6.16247	5.58229	5.69213	5.93298	5.32893	5.56884	5.92804	5.997	5.91124	5.70239	5.93672	5.74594	5.37155	5.85153	5.69799	5.52964	5.57055	5.5311	5.81602	5.91175	5.91652	5.57924	5.56065	5.92281	5.60878	5.78003	5.78898	5.40222	6.24516	5.79289	5.82069	5.82146	5.66355	6.00548	5.6499	5.65339	5.79559	5.87239
chr17	30311079	30311151	17335624	---		---	ENSMUST00000158597 // ENSEMBL // ncrna:snRNA chromosome:NCBIM37:17:30448024:30448096:1		3.89508	3.81858	3.66932	3.92192	3.61157	3.66665	3.83315	4.17093	3.92251	3.79378	3.92215	3.54164	4.09655	3.67641	3.96666	3.79443	3.60289	3.44316	3.55515	3.86142	3.82396	3.54581	3.53322	4.02601	3.6801	4.03684	3.94545	3.85302	4.2471	4.04871	3.95396	4.16399	3.73186	3.71048	3.48627	3.74416	3.93857	3.74556	4.02796	3.42684	3.80263
chr17	26937972	26939478	17342664	NM_026307 // Cuta // cutA divalent cation tolerance homolog (E. coli) // 17|17 B1 // 67	Cuta	NM_026307	NM_026307 // RefSeq // Mus musculus cutA divalent cation tolerance homolog (E. coli) (C		9.78904	8.93286	9.16403	9.14505	9.26225	9.16261	9.21267	9.44839	9.50178	9.2347	8.85118	9.50167	9.18485	9.11516	9.39849	9.36363	9.66952	8.95008	9.14086	9.25929	9.2485	9.22216	9.01638	9.59311	9.22858	9.23051	9.14709	9.15296	8.94761	9.48238	9.43217	9.14889	9.2039	9.35639	9.39113	9.44939	8.85961	9.18917	9.05403	8.78282	8.88662
chr17	27959615	27965316	17342803	---		---	AK144031 // GenBank HTC // Mus musculus adult male kidney cDNA, RIKEN full-length enric		5.35015	5.12534	5.19989	5.26831	5.08529	5.03313	5.1009	5.27691	5.33433	5.09255	5.47736	5.11439	5.27199	4.95158	5.5452	4.90012	5.29114	5.07989	4.97899	4.72697	5.15531	5.12846	5.00391	5.03285	5.00306	5.06964	5.24458	5.08373	5.21974	5.53559	4.68881	5.12263	5.40929	5.11019	4.80126	5.18402	5.29629	5.49445	5.1819	5.18089	4.61087
chr17	33915904	33919325	17336242	NM_020625 // Zbtb22 // zinc finger and BTB domain containing 22 // 17 B1|17 // 81630 //	Zbtb22	NM_020625	NM_020625 // RefSeq // Mus musculus zinc finger and BTB domain containing 22 (Zbtb22),		7.89843	8.21227	8.09829	7.90633	7.81221	7.86029	7.7691	7.8744	7.88955	7.78862	8.04602	8.06553	7.87624	7.71161	7.61778	8.12084	8.42412	7.61856	7.84563	7.69803	7.83409	7.95218	7.8007	8.06486	7.4976	7.68955	8.03208	7.54372	7.75435	7.73963	7.83364	8.02048	8.35028	8.0764	8.12494	7.73531	7.76598	8.20099	8.26028	8.25209	7.5839
chr17	23600856	23611019	17334065	NM_001033425 // Zscan10 // zinc finger and SCAN domain containing 10 // 17|17 A3 // 332	Zscan10	NM_001033425	NM_001033425 // RefSeq // Mus musculus zinc finger and SCAN domain containing 10 (Zscan		4.6518	4.27851	4.66905	3.9556	4.59054	4.74938	4.41776	4.67066	4.38472	4.3107	4.81513	4.40579	4.35814	4.3647	4.99486	4.255	4.3322	4.53378	4.35262	4.28447	4.52516	4.50566	4.43965	4.39829	4.27802	4.55248	4.20467	4.13408	4.41054	4.3055	4.57263	4.44121	4.55902	4.43026	4.44682	4.31954	4.31715	4.29385	4.30571	4.36482	4.58226
chr17	13712444	13761825	17341044	ENSMUST00000148430 // Tcte2 // t-complex-associated testis expressed 2 // 17 A1|17 7.9	Tcte2	ENSMUST00000148430	ENSMUST00000148430 // ENSEMBL // cdna:known chromosome:NCBIM37:17:13853443:13898832:-1		6.70776	6.54553	6.94317	7.00434	6.761	6.52326	6.47595	6.40042	6.35915	6.2995	6.81753	6.59432	6.82037	6.64416	6.47951	6.59883	7.14818	6.64719	6.64362	6.53778	6.63175	6.94988	6.66587	6.42531	6.63028	6.35478	6.4863	6.45363	6.68782	6.60588	6.62256	6.85097	6.72189	6.79569	6.85314	6.582	6.60991	6.37884	6.42087	6.47419	6.56353
chr17	8372395	8422728	17333107	NM_001161832 // T2 // brachyury 2 // 17 A1|17 4.01 cM // 21331 /// AF072546 // T2 // br	T2	NM_001161832	NM_001161832 // RefSeq // Mus musculus brachyury 2 (T2), mRNA. // chr17 // 100 // 100 /		5.46082	5.68185	6.14045	5.24134	5.35039	5.2503	5.7326	5.06929	4.97866	5.50477	5.6378	5.82315	5.32545	5.75815	5.52016	5.55481	5.57197	5.95516	5.75682	5.61922	5.28901	5.35872	5.22158	4.8971	5.3547	5.80458	5.4149	5.3999	5.93351	5.36337	5.40213	6.54043	5.50065	5.77547	5.44665	5.28411	5.50459	5.28574	5.39774	5.97062	5.34506
chr17	24023200	24023328	17341679	---		---	ENSMUST00000103996 // ENSEMBL // ncrna:snoRNA chromosome:NCBIM37:17:24160167:24160295:-		7.02277	7.16552	7.22131	6.9128	7.32306	6.86301	7.17773	7.41485	6.81123	7.05292	7.48415	7.23113	6.86656	7.25716	7.12452	6.51466	7.04588	7.36582	7.30691	6.74873	6.6568	6.60237	7.50263	6.53762	7.05531	7.06893	6.86634	7.15711	7.14378	6.56987	6.87209	7.30943	7.06635	6.84335	7.4515	6.99858	7.1598	7.08668	7.35174	7.13402	6.69372
chr17	20623846	20624877	17341340	NM_008040 // Fpr-rs3 // formyl peptide receptor, related sequence 3 // 17 A3.2|17 // 14	Fpr-rs3	NM_008040	NM_008040 // RefSeq // Mus musculus formyl peptide receptor, related sequence 3 (Fpr-rs		4.44099	4.7705	4.63842	5.18905	4.47432	5.05095	4.477	4.51178	4.93241	4.39564	4.3461	4.21626	4.48226	4.53295	4.61352	4.94104	4.20957	4.6659	4.76144	4.44642	4.8332	4.44623	4.96295	4.52401	5.02231	4.60018	4.65089	4.38105	4.60768	4.0287	4.64934	4.79704	4.32862	4.68439	4.78752	4.34727	5.37664	4.62491	4.87947	4.61109	4.44791
chr17	10403012	10840311	17340774	ENSMUST00000041463 // Pacrg // PARK2 co-regulated // 17 A2|17 5.9 cM // 69310 /// NM_02	Pacrg	ENSMUST00000041463	ENSMUST00000041463 // ENSEMBL // cdna:known chromosome:NCBIM37:17:10595878:11033177:-1		5.56838	5.59836	5.70099	5.29597	5.28748	5.78763	5.5832	5.09558	5.44991	5.75118	5.5031	6.00147	5.74463	5.63924	6.45486	6.20236	5.29263	6.10313	6.05797	5.622	4.56661	5.67218	5.00884	5.73214	5.55696	6.15505	5.1385	5.42449	5.214	4.93123	6.06902	5.45297	5.60111	5.80782	6.23716	5.74542	5.73002	5.50433	5.6433	5.57008	5.49412
chr17	3635240	3696261	17340458	NM_198958 // Nox3 // NADPH oxidase 3 // 17 A1|17 4.1 cM // 224480 /// ENSMUST0000002456	Nox3	NM_198958	NM_198958 // RefSeq // Mus musculus NADPH oxidase 3 (Nox3), mRNA. // chr17 // 100 // 10		4.33431	4.41593	4.82781	4.68525	4.69994	4.54784	4.50415	4.59677	4.6618	4.55458	4.49894	4.81985	4.7663	4.49575	4.34391	4.6791	4.2733	4.49317	4.3702	4.54547	4.38742	4.63939	4.75202	4.52014	4.51805	4.72756	4.35851	4.51966	4.35814	4.33784	4.61846	4.46125	4.68031	4.48345	4.57086	4.44795	4.54443	4.46471	4.40694	4.64058	4.61749
chr17	26195999	26199087	17342602	NM_001081070 // Pdia2 // protein disulfide isomerase associated 2 // 17 A3.3|17 // 6919	Pdia2	NM_001081070	NM_001081070 // RefSeq // Mus musculus protein disulfide isomerase associated 2 (Pdia2)		4.8814	5.0718	5.0365	4.18732	5.20739	5.07267	5.25903	5.40689	4.69074	5.20175	4.86677	5.1439	5.26562	5.15285	4.86619	4.8212	4.88298	5.136	5.15451	4.77858	5.05373	5.04942	4.99995	4.98993	4.86017	5.00334	5.05679	5.26796	5.15526	5.06606	5.1628	5.12821	5.03545	4.98473	5.19166	4.92908	4.99215	5.06391	5.60424	5.45141	4.89215
chr17	8379045	8389468	17340737	NR_045795 // Gm16702 // predicted gene, 16702 // 17 A1|17 4.92 cM // 100504601	Gm16702	NR_045795	NR_045795 // RefSeq // Mus musculus predicted gene, 16702 (Gm16702), non-coding RNA. //		5.8192	5.01763	7.04756	5.81478	4.4233	4.60098	5.79016	4.22111	4.68888	5.99274	6.20379	6.86449	4.57045	5.91757	5.6536	5.64017	6.94715	6.63007	5.91581	6.83091	4.24762	6.01568	4.34478	4.66832	5.50106	6.41211	4.64957	5.82291	7.34691	4.43902	4.13066	7.59556	4.44506	6.89149	4.92942	3.80012	4.77122	5.45832	5.79116	7.61447	5.4299
chr17	29114145	29133811	17335474	---		---	ENSMUST00000141797 // ENSEMBL // cdna:known chromosome:NCBIM37:17:29251090:29270638:1 g		6.67918	6.44687	6.49182	5.99773	6.57999	6.81118	6.51269	6.56371	6.71276	6.63411	6.77585	6.53811	6.84449	6.67638	6.80334	6.49484	6.59019	6.9088	6.37338	6.44281	6.60035	6.37644	6.60995	6.54858	6.54392	6.54878	6.63249	6.33944	6.65027	6.31338	6.35097	6.58188	6.39697	6.51437	6.55837	6.47439	6.77393	6.52994	6.42165	6.63828	6.164
chr17	34024966	34025092	17343733	NR_029800 // Mir219-1 // microRNA 219-1 // 17|17 // 723823	Mir219-1	NR_029800	NR_029800 // RefSeq // Mus musculus microRNA 219-1 (Mir219-1), microRNA. // chr17 // 10		5.74223	5.98356	5.85588	5.4257	5.95347	5.77136	5.62257	5.75206	5.66826	5.85958	5.78923	5.7137	5.84274	5.64388	6.32199	5.94212	5.89859	5.57524	5.62445	5.57242	5.39941	5.38917	5.51938	5.6732	5.30161	5.64798	5.56405	5.58709	5.54189	5.48289	5.53383	5.59288	5.68189	5.47481	5.39208	5.72384	5.59168	6.01718	5.53998	5.68493	5.14248
chr17	14709066	14710055	17333480	---		---	ENSMUST00000071282 // ENSEMBL // cdna:known chromosome:NCBIM37:17:14846073:14847062:1 g		12.2107	11.4246	11.8322	11.1815	12.0167	10.9548	11.5614	11.5271	11.5039	11.5987	10.2562	11.5792	10.18	11.6534	11.9226	11.0362	11.7904	11.476	11.1427	11.4104	11.3577	11.7017	11.2858	11.289	11.4515	11.7069	11.1846	11.4688	11.3679	11.3226	11.2185	11.3189	11.2797	11.3501	10.2697	11.3168	11.1306	11.827	11.3424	11.5583	11.3677
chr17	25951472	25963610	17334835	ENSMUST00000041641 // Solh // small optic lobes homolog (Drosophila) // 17|17 A3 // 508	Solh	ENSMUST00000041641	ENSMUST00000041641 // ENSEMBL // cdna:known chromosome:NCBIM37:17:26095315:26122741:-1		5.73461	5.59786	5.63445	5.57381	5.75149	6.05672	5.51438	5.73196	5.83289	6.11892	6.02869	5.70816	5.8523	5.60638	5.92145	5.74546	5.76832	5.61172	5.78744	5.8689	5.97418	5.73304	5.87677	5.65681	5.61602	5.38525	5.87397	5.49216	5.64074	5.99172	5.80042	5.45571	5.97894	5.53371	5.84078	5.54005	5.83371	5.57243	5.7063	5.6874	5.78107
chr17	31152752	31163052	17335790	---		---	ENSMUST00000146320 // ENSEMBL // cdna:known chromosome:NCBIM37:17:31289697:31299997:1 g		6.16014	6.05422	6.19532	5.97625	6.13819	6.12448	6.16133	6.2939	5.86515	6.11645	5.95153	5.83978	6.25163	6.02899	5.85804	5.67704	6.28965	6.22027	6.06451	6.042	6.10558	6.1869	5.98343	5.98675	6.01024	6.23885	5.99594	6.06919	6.25498	6.22175	6.19431	6.12645	6.10958	5.99398	6.33808	6.04968	6.10903	6.03955	6.09012	6.10299	5.96594
chr17	34809092	34823464	17343976	NM_011413 // C4a // complement component 4A (Rodgers blood group) // 17 B1|17 18.83 cM	C4a	NM_011413	NM_011413 // RefSeq // Mus musculus complement component 4A (Rodgers blood group) (C4a)		4.92193	5.41333	4.35202	4.65985	4.9462	4.73071	4.88727	5.11483	5.25415	4.47058	5.14267	5.09785	4.96737	4.30336	5.30383	5.31836	5.24611	4.83724	4.81122	4.54643	4.65815	4.78404	4.96469	5.03243	4.80015	4.94005	5.33149	5.01935	4.8045	5.07531	5.53095	4.96267	5.14113	4.64901	5.52001	5.57435	5.66206	5.15843	4.90926	4.93953	4.83575
chr17	21228826	21229815	17333893	NM_134198 // Vmn1r234 // vomeronasal 1 receptor 234 // 17 A3.2|17 // 171232 /// ENSMUST	Vmn1r234	NM_134198	NM_134198 // RefSeq // Mus musculus vomeronasal 1 receptor 234 (Vmn1r234), mRNA. // chr		3.17765	3.72414	3.43849	4.89442	3.48894	3.45062	3.20612	3.59865	3.40848	4.19387	3.6291	3.47748	3.59831	3.44545	3.48721	3.86704	3.27414	3.41907	3.19391	3.1965	3.24281	3.69323	3.39223	3.51269	3.60578	3.17668	3.28301	3.24937	3.34498	3.56025	3.2662	3.32349	3.30726	3.44014	3.56463	3.38624	3.51556	3.41495	3.33964	3.30144	3.39639
chr17	8434423	8442496	17333121	NM_009309 // T // brachyury // 17 A1|17 4.02 cM // 20997 /// ENSMUST00000074667 // T //	T	NM_009309	NM_009309 // RefSeq // Mus musculus brachyury (T), mRNA. // chr17 // 100 // 92 // 22 //		4.65655	5.03611	4.83624	5.16912	4.97126	4.9174	4.84748	4.84289	4.77031	5.10753	4.81854	4.91805	4.90724	4.75289	5.04331	4.53151	4.99911	4.89033	4.91573	4.87943	4.84109	4.76586	4.92635	4.63907	5.03904	4.98701	4.91427	4.70496	4.9372	4.42634	4.78574	4.89922	5.06863	5.30807	4.80305	4.54302	4.75422	5.1108	4.80274	4.83134	4.96139
chr17	35203165	35205351	17344316	NM_010735 // Lta // lymphotoxin A // 17 B1|17 19.06 cM // 16992 /// ENSMUST00000025266	Lta	NM_010735	NM_010735 // RefSeq // Mus musculus lymphotoxin A (Lta), mRNA. // chr17 // 100 // 100 /		5.06583	4.91614	4.76148	5.05797	5.00025	4.91656	4.83024	5.06152	4.93704	5.12974	5.01399	5.00603	5.1021	4.82249	4.64993	4.57816	5.22759	4.98765	5.13981	4.79678	4.58019	4.53135	5.14788	4.74484	4.74673	4.7914	5.01271	4.63062	4.71543	4.46831	4.79206	4.76537	4.90119	4.86699	5.02349	4.9529	5.20632	4.96496	4.82114	5.02066	4.7721
chr17	23004971	23006659	17334040	NR_033648 // Vmn2r-ps129 // vomeronasal 2, receptor, pseudogene 129 // 17 A3.3|17 // 66	Vmn2r-ps129	NR_033648	NR_033648 // RefSeq // Mus musculus vomeronasal 2, receptor, pseudogene 129 (Vmn2r-ps12		3.15746	3.18553	3.32254	4.24995	3.1856	3.09309	3.32181	3.62264	3.28946	3.12656	3.50701	3.24817	3.29106	3.17308	3.55656	3.25764	3.1443	3.70176	3.25314	3.27152	3.11071	3.44381	3.26463	3.143	3.12618	3.18656	3.26065	3.15328	3.53423	3.38347	3.19958	3.53571	3.0516	3.43499	3.36013	3.14952	3.44888	2.92995	3.38734	3.27654	3.12798
chr17	17521717	17523223	17548018	AK147232 // Lnpep // leucyl/cystinyl aminopeptidase // 17 A3.2|17 // 240028 /// XR_1070	Lnpep	AK147232	AK147232 // GenBank HTC // Mus musculus cDNA, RIKEN full-length enriched library, clone		8.04566	8.36329	8.05996	7.26385	8.85744	8.53238	8.54269	8.68584	8.71209	8.16636	8.53382	8.34897	8.63622	8.22112	6.99429	7.81812	8.7579	8.26379	8.45912	8.50824	8.65284	8.24129	8.45748	8.4149	7.98112	7.98065	8.23857	8.47876	8.10465	8.54212	8.57888	8.49549	8.56368	8.7328	8.20693	8.48321	8.34323	8.02643	8.048	7.87354	8.44039
chr17	28549487	28552618	17335352	NM_001034871 // Gm749 // predicted gene 749 // 17 A3.3|17 // 328788 /// ENSMUST00000025	Gm749	NM_001034871	NM_001034871 // RefSeq // Mus musculus predicted gene 749 (Gm749), mRNA. // chr17 // 10		4.96098	5.19241	4.8978	5.67638	5.23757	5.22205	5.20992	5.24544	5.14158	5.24918	5.69557	4.99112	5.29314	5.13899	5.25839	4.79898	5.07475	5.00555	5.05496	5.1021	5.13061	5.10621	5.10776	4.93209	4.81971	4.90674	4.85379	4.80434	5.11499	4.8157	5.0127	5.15809	5.08837	4.69288	5.13091	4.83709	5.01857	5.22941	5.11011	5.21867	4.90141
chr17	27635343	27636862	17335142	---		---	ENSMUST00000133274 // ENSEMBL // cdna:known chromosome:NCBIM37:17:27772288:27773807:1 g		6.00387	6.25652	6.17985	6.30436	6.29683	6.46465	6.29688	6.42956	6.0922	6.35464	6.35791	5.94637	6.37196	6.12308	6.35607	6.32004	6.16518	6.0781	6.32342	6.04281	5.99485	6.47471	6.07658	6.029	6.22009	6.23492	6.14252	5.92333	6.21695	6.50567	6.04831	6.41084	6.22356	5.79064	6.05229	6.01823	5.97045	6.24383	6.0173	6.28787	6.04426
chr17	34898469	34914051	17336758	NM_145830 // Ehmt2 // euchromatic histone lysine N-methyltransferase 2 // 17 B1|17 18.8	Ehmt2	NM_145830	NM_145830 // RefSeq // Mus musculus euchromatic histone lysine N-methyltransferase 2 (E		9.15987	9.01625	8.97447	9.33705	9.06284	9.11491	8.82241	9.06476	9.02709	9.17602	9.00675	9.03602	9.01778	9.0534	9.6151	9.38965	9.36518	9.49394	9.09982	9.19887	9.0318	9.09017	8.94899	9.30364	9.10538	8.97602	8.76018	8.86924	9.09717	8.78264	9.27706	8.66223	9.32273	9.07975	9.01671	9.38603	9.01567	8.89032	9.1554	9.00872	8.99358
chr17	34468346	34518715	17343834	NM_030747 // Btnl6 // butyrophilin-like 6 // 17 B1|17 18.7 cM // 624681 /// ENSMUST0000	Btnl6	NM_030747	NM_030747 // RefSeq // Mus musculus butyrophilin-like 6 (Btnl6), mRNA. // chr17 // 100		4.21369	4.21933	4.27708	3.98591	4.40652	4.02184	3.91611	4.21685	3.69947	4.52413	4.44947	4.29934	4.09914	3.87065	4.15104	3.99709	4.22172	4.35899	4.02303	3.93467	4.2788	3.96296	3.98202	3.91933	3.67251	4.02302	4.1789	4.16157	4.08729	3.94421	4.30153	4.27883	4.05847	4.21711	4.26516	3.74671	4.217	3.97854	3.94679	4.14515	4.71496
chr17	17527723	17624489	17341247	NM_172827 // Lnpep // leucyl/cystinyl aminopeptidase // 17 A3.2|17 // 240028 /// ENSMUS	Lnpep	NM_172827	NM_172827 // RefSeq // Mus musculus leucyl/cystinyl aminopeptidase (Lnpep), mRNA. // ch		10.0849	10.1349	10.021	10.285	10.8148	10.4072	10.1344	10.5936	10.4109	10.1189	10.513	10.4007	10.6549	9.95492	10.2614	10.0838	10.5213	10.8013	10.5718	10.3195	10.4754	10.0548	10.2368	10.3698	9.8015	9.75434	10.1692	10.3209	9.98703	10.5138	10.4878	10.0807	10.4101	10.5102	10.1042	10.4037	10.298	9.98979	9.67726	9.97822	10.1551
chr17	13228852	13237189	17333380	ENSMUST00000162940 // Smok2b // sperm motility kinase 2B // 17 A1|17 // 236574 /// NM_0	Smok2b	ENSMUST00000162940	ENSMUST00000162940 // ENSEMBL // cdna:known chromosome:NCBIM37:17:13421718:13430055:1 g		6.01503	6.34471	6.23253	6.24315	6.10935	6.39182	6.43674	6.45013	6.02968	6.26411	6.41608	5.81807	6.31824	6.15463	6.08141	6.40132	6.25142	6.31814	6.23492	6.48758	5.94703	6.24465	6.26754	6.07401	6.02786	6.22414	6.27563	6.21694	6.17277	6.07429	6.31395	6.3113	6.15004	6.22236	6.4448	6.20386	6.32192	6.12333	5.88209	6.50342	6.18605
chr17	13249895	13250000	17341022	---		---	ENSMUST00000101829 // ENSEMBL // ncrna:snRNA chromosome:NCBIM37:17:13442761:13442866:-1		3.72815	3.78484	3.56146	3.77269	4.17908	4.23471	3.64971	4.15858	3.88679	4.37283	3.78663	4.20043	3.96063	4.27338	4.39385	3.35043	4.06169	3.90387	3.65992	3.57201	4.11745	3.9266	3.83043	4.24564	3.82482	4.18993	3.78238	3.94539	3.65123	3.8063	3.71603	3.62277	4.04228	3.69085	4.18449	4.28428	3.69209	3.76672	3.56763	3.68456	3.99389
chr17	32403006	32404808	17335932	ENSMUST00000063824 // Rasal3 // RAS protein activator like 3 // 17 B1|17 // 320484 ///	Rasal3	ENSMUST00000063824	ENSMUST00000063824 // ENSEMBL // cdna:known chromosome:NCBIM37:17:32527604:32540528:-1		6.26222	6.19526	6.15853	5.82568	6.534	6.42095	6.27966	6.30381	5.71905	6.23713	6.26181	6.38907	6.35867	6.38523	6.03531	5.95287	6.23887	6.26146	5.96074	6.03933	5.99622	6.13138	6.12514	5.76639	5.99418	6.13957	6.23945	6.02249	6.21107	5.91685	6.08594	6.11077	6.3201	5.85531	6.25624	5.79061	6.14188	6.26737	6.11227	6.30739	6.08927
chr17	29519281	29519790	17343063	---		---	ENSMUST00000168877 // ENSEMBL // cdna:known chromosome:NCBIM37:17:29656226:29656735:-1		5.0167	4.87817	5.02102	5.66463	5.11316	4.63281	5.12333	5.19402	5.27876	5.03928	5.02881	4.89302	5.30878	4.92099	5.38996	4.96181	5.05594	4.9844	5.01352	5.25953	5.20336	4.95291	5.10696	4.73926	4.96603	4.97347	4.98878	4.81462	5.16494	4.91297	4.91703	5.23042	4.76643	4.83996	5.14602	4.83261	5.38874	5.19686	4.96425	5.1286	5.03622
chr17	35377021	35380292	17344331	NM_001143689 // H2-Q4 // histocompatibility 2, Q region locus 4 // 17 B1|17 19.16 cM //	H2-Q4	NM_001143689	NM_001143689 // RefSeq // Mus musculus histocompatibility 2, Q region locus 4 (H2-Q4),		5.5225	5.38956	5.74922	4.95163	5.54367	5.95209	5.25022	5.74287	5.38123	5.53601	6.02949	5.33911	5.80592	5.41686	5.48021	5.15122	5.56381	5.59328	5.34133	5.78468	5.93715	5.74935	5.27067	5.90605	5.30588	5.28983	5.45212	5.47899	5.53296	5.35165	5.31457	5.43369	5.69271	5.45482	5.54526	5.6397	5.72223	5.6915	5.25983	5.5247	5.07865
chr17	34591266	34597400	17336602	ENSMUST00000038149 // Pbx2 // pre B cell leukemia homeobox 2 // 17 B1|17 // 18515 /// N	Pbx2	ENSMUST00000038149	ENSMUST00000038149 // ENSEMBL // cdna:known chromosome:NCBIM37:17:34729208:34734345:1 g		6.04674	6.33874	5.99773	6.03654	6.23814	6.21941	6.07155	6.0888	5.98231	5.17722	6.06348	6.19623	6.05668	5.9221	6.08758	5.69583	5.997	6.13586	5.86788	6.08246	6.03785	6.26253	5.8556	5.91971	6.02067	5.98205	5.95138	5.70273	5.68658	5.74346	6.00493	5.81486	6.12636	6.17998	5.86906	6.00612	5.98431	5.97599	5.69704	5.88804	5.88008
chr17	24632682	24638838	17334356	NM_008743 // Nthl1 // nth (endonuclease III)-like 1 (E.coli) // 17|17 A3 // 18207 /// E	Nthl1	NM_008743	NM_008743 // RefSeq // Mus musculus nth (endonuclease III)-like 1 (E.coli) (Nthl1), mRN		6.54495	6.68636	6.72771	6.66568	6.77905	6.72367	6.60879	6.95987	6.53004	6.68252	6.94084	6.58716	6.63153	6.67846	6.98296	6.89011	6.86217	6.38436	6.65423	6.71517	6.81887	6.92676	6.43518	6.94434	6.71601	6.82748	6.94949	6.37318	6.7143	6.57197	6.92961	6.63094	6.6728	6.77571	6.30522	6.86664	6.61646	6.71294	6.68558	6.47938	6.93111
chr17	15027151	15041559	17341164	NM_011560 // Tcte3 // t-complex-associated testis expressed 3 // 17 A2|17 8.16 cM // 21	Tcte3	NM_011560	NM_011560 // RefSeq // Mus musculus t-complex-associated testis expressed 3 (Tcte3), tr		6.49556	7.24452	6.97997	6.78872	6.907	6.8768	6.88109	6.31707	6.61659	7.36922	6.66783	7.28956	7.21118	6.83871	6.65976	7.12044	7.27907	6.99822	6.89235	6.5959	6.17343	6.53003	6.99643	6.73276	6.89637	6.87147	6.73032	7.30229	6.80303	6.87709	6.76156	6.92156	6.79647	7.02379	8.64698	6.85842	6.82628	6.70638	7.01478	6.95829	6.75625
chr17	30005087	30210020	17335616	NM_148926 // Zfand3 // zinc finger, AN1-type domain 3 // 17 A3.3|17 // 21769 /// ENSMUS	Zfand3	NM_148926	NM_148926 // RefSeq // Mus musculus zinc finger, AN1-type domain 3 (Zfand3), mRNA. // c		10.1171	9.81534	10.011	9.98125	9.72271	10.0981	9.76919	9.91609	9.88612	9.4647	10.0471	9.9276	9.97887	9.97376	10.2559	9.75234	10.1178	9.64568	9.96098	9.91637	9.64454	10.0702	9.73842	9.82201	9.6618	9.52466	9.87316	9.76712	9.7861	9.7093	9.83999	9.71231	10.1108	10.1643	9.78328	9.90977	9.70037	9.97893	9.66261	9.59019	9.8636
chr17	30901840	30936510	17335726	NM_021332 // Glp1r // glucagon-like peptide 1 receptor // 17 A3.3|17 18.0 cM // 14652 /	Glp1r	NM_021332	NM_021332 // RefSeq // Mus musculus glucagon-like peptide 1 receptor (Glp1r), mRNA. //		5.67104	6.20105	5.61583	5.59498	5.84734	5.51928	6.86161	6.09285	5.41703	5.91582	5.3606	5.73303	5.27852	6.30181	5.39437	5.83897	5.59543	7.02746	5.83519	7.79956	5.09338	4.82686	6.45837	4.74725	7.5972	5.4269	5.34761	7.16252	6.06432	5.23382	7.03328	5.91485	6.1701	5.88312	6.44043	5.98539	5.10162	5.31626	5.02969	6.91039	5.24907
chr17	35220175	35235815	17344322	NM_010909 // Nfkbil1 // nuclear factor of kappa light polypeptide gene enhancer in B ce	Nfkbil1	NM_010909	NM_010909 // RefSeq // Mus musculus nuclear factor of kappa light polypeptide gene enha		7.1425	7.42625	7.5112	6.55635	7.25162	7.54745	7.21454	7.40877	7.20923	7.4738	7.44096	7.54857	7.46797	7.16993	7.33285	7.3085	7.70797	7.23619	7.55857	7.20518	7.07287	7.37063	7.05185	7.18883	6.96689	7.43763	7.50813	7.06222	7.08164	7.03047	7.29715	7.17723	7.8189	7.06169	7.20391	7.36656	7.23425	7.33385	7.57767	7.30735	7.13244
chr17	33176416	33177363	17336071	NM_010998 // Olfr55 // olfactory receptor 55 // 17 B1|17 // 100038859 /// ENSMUST000001	Olfr55	NM_010998	NM_010998 // RefSeq // Mus musculus olfactory receptor 55 (Olfr55), mRNA. // chr17 // 1		3.79984	3.75217	3.99681	4.43105	3.94702	3.58519	4.04209	3.7383	4.1615	4.0461	4.21046	3.78991	4.16559	4.22782	3.67418	4.08567	4.18067	3.9855	3.77558	3.84246	4.11091	3.68328	3.78281	4.08319	3.71471	3.68227	3.92444	3.96567	4.18444	3.93665	3.78102	3.71564	3.9886	4.0161	3.80016	3.74041	3.97995	3.88129	3.68789	3.87383	3.82453
chr17	23823291	23823369	17334147	NR_039586 // Mir5125 // microRNA 5125 // 17|17 12.08 cM // 100628593 /// NR_039586 // M	Mir5125	NR_039586	NR_039586 // RefSeq // Mus musculus microRNA 5125 (Mir5125), microRNA. // chr17 // 100		10.9412	10.2117	9.98213	10.236	11.0531	10.4183	10.2102	10.7649	10.8116	10.1621	10.6935	10.4635	10.6656	10.3048	11.1694	10.1225	10.9934	10.9344	10.5191	10.3151	10.5505	10.138	10.7109	10.6666	10.3551	10.4776	9.80679	10.5723	10.0523	10.9171	10.3115	9.81545	10.2362	10.7168	10.6314	10.7686	10.1262	10.0173	10.4072	10.5274	9.96873
chr17	33144505	33169892	17336062	XM_003689308 // LOC100861596 // zinc finger protein 791-like // --- // 100861596	LOC100861596	XM_003689308	XM_003689308 // RefSeq // PREDICTED: Mus musculus zinc finger protein 791-like (LOC1008		3.49037	3.52173	3.44419	3.93814	3.42066	3.42647	3.47613	3.65241	3.48643	3.55551	3.38577	3.54172	3.50316	3.26509	3.2014	3.66534	3.40338	3.56609	3.44541	3.70413	3.33944	3.39603	3.33568	3.46943	3.5826	3.60622	3.73538	3.32078	3.60452	3.61021	3.40857	3.36722	3.19645	3.72097	3.43206	3.765	3.93893	3.40633	3.82335	3.19887	3.34875
chr17	26860287	26886175	17342661	---		---	---		5.25059	5.66523	5.82224	5.70499	5.87035	5.50381	5.66786	5.62827	5.66702	5.34782	5.42844	5.99641	5.79617	5.70382	5.73703	6.14893	5.95633	5.64332	5.36066	5.577	5.84815	5.47391	5.47359	5.63912	5.75054	5.71627	5.94667	5.42699	5.7192	5.66608	6.01742	5.43416	5.71227	5.86692	5.62085	5.89853	6.02682	5.94252	5.94739	5.60484	5.81215
chr17	34341957	34347547	17343827	NM_010381 // H2-Ea-ps // histocompatibility 2, class II antigen E alpha, pseudogene //	H2-Ea-ps	NM_010381	NM_010381 // RefSeq // Mus musculus histocompatibility 2, class II antigen E alpha, pse		4.3694	4.23558	4.26564	4.56619	4.37386	4.40891	4.18815	4.5307	4.12714	4.45168	4.5798	4.18703	4.5547	4.37416	4.59298	3.97904	4.20341	4.63211	4.39489	3.92351	4.29043	4.37682	4.25106	4.35531	4.29414	4.37446	4.20845	3.97535	4.54648	4.58696	4.33239	4.44964	4.37886	4.38277	4.52386	4.25322	4.54732	4.59641	4.25476	4.2984	3.76457
chr17	23790501	23794495	17334126	AK086736 // D930048G16Rik // RIKEN cDNA D930048G16 gene // 17 A3.3|17 // 433082 /// XR_	D930048G16Rik	AK086736	AK086736 // GenBank HTC // Mus musculus 15 days embryo head cDNA, RIKEN full-length enr		7.02262	7.58253	8.06142	7.30862	6.62262	7.01228	7.29657	5.68846	6.22719	6.94525	7.34912	7.0279	7.28957	7.61614	7.80455	7.42185	8.0631	8.00918	7.05516	7.32397	6.105	7.63103	6.84457	6.49307	7.16063	7.5948	6.44409	6.24007	7.50697	6.23353	6.57094	7.61565	7.03877	7.6893	7.36522	6.74319	6.78561	6.73013	7.69076	7.44019	7.83121
chr17	28905265	28906771	17335431	NR_045457 // 1700030A11Rik // RIKEN cDNA 1700030A11 gene // 17|17 // 74179	1700030A11Rik	NR_045457	NR_045457 // RefSeq // Mus musculus RIKEN cDNA 1700030A11 gene (1700030A11Rik), non-cod		5.10948	4.95399	5.37844	4.99668	5.1998	5.09935	4.90397	5.20335	5.17497	5.39578	5.04715	5.0866	4.80225	5.3182	5.02857	5.18938	5.42859	4.93798	5.06507	4.84745	4.9614	4.86897	4.69007	4.97588	4.98942	5.14872	5.15884	5.12516	5.09886	5.11667	4.72986	5.06688	5.25394	5.20763	5.02511	5.07396	5.1513	5.05856	5.16751	5.36769	5.04837
chr17	25882114	25919727	17342496	ENSMUST00000167626 // Rab40c // Rab40c, member RAS oncogene family // 17 A3.3|17 // 224	Rab40c	ENSMUST00000167626	ENSMUST00000167626 // ENSEMBL // cdna:known chromosome:NCBIM37:17:26019059:26056597:-1		8.71629	8.93369	8.90042	9.36285	8.76309	8.98815	8.7077	9.01843	8.78241	8.8352	8.85769	8.76851	9.04881	8.63138	8.36107	9.20149	9.26638	8.44944	9.03055	8.95225	8.88358	8.6978	8.57511	8.90164	8.62272	8.62756	8.7838	8.6116	8.64751	8.87064	8.97289	8.64057	9.01485	8.89794	8.76169	9.0622	8.51535	8.97381	8.82796	8.7273	8.80781
chr17	34039437	34066685	17336338	NM_009926 // Col11a2 // collagen, type XI, alpha 2 // 17 B1|17 18.51 cM // 12815 /// EN	Col11a2	NM_009926	NM_009926 // RefSeq // Mus musculus collagen, type XI, alpha 2 (Col11a2), mRNA. // chr1		5.63968	5.83541	5.70735	6.29134	5.80035	5.92416	5.89646	5.96816	5.68192	5.86164	6.09602	5.80331	5.83437	5.65406	6.0629	6.07473	6.02998	6.11663	5.96835	5.8543	5.94532	5.63543	5.95806	5.81808	5.59224	5.70921	5.65633	5.61763	5.67936	5.60711	5.77145	6.24862	5.97732	5.83967	5.83879	5.72641	5.79695	5.97727	5.8652	5.84968	5.66214
chr17	34211312	34214459	17343807	AK007825 // Gm15821 // predicted gene 15821 // 17|17 17.98 cM // 100502931 /// XR_14144	Gm15821	AK007825	AK007825 // GenBank HTC // Mus musculus 10 day old male pancreas cDNA, RIKEN full-lengt		7.45472	7.48885	7.45329	7.6867	7.76212	8.10336	7.29138	7.80252	7.21174	7.54234	8.14866	7.31188	8.04499	7.41196	7.67128	7.70944	7.54659	7.66882	7.89623	7.57802	7.58625	7.53009	7.37332	7.50123	7.30905	7.56757	7.52201	7.53326	7.29993	7.47856	7.41249	7.45818	7.75903	7.24889	7.74058	7.29232	7.49981	7.42493	7.62485	7.51602	7.23644
chr17	34031812	34038403	17336322	NM_001205214 // Rxrb // retinoid X receptor beta // 17 B1|17 18.49 cM // 20182 /// NM_0	Rxrb	NM_001205214	NM_001205214 // RefSeq // Mus musculus retinoid X receptor beta (Rxrb), transcript vari		8.16698	8.14468	7.95814	8.35322	8.05805	8.36901	7.93729	7.86505	8.02263	8.06206	8.17978	8.06353	8.33596	7.64024	8.60671	8.15815	8.24375	8.15954	8.31917	8.0349	7.94752	8.10032	7.61599	7.95866	7.65711	7.96544	7.84784	7.67548	7.85877	7.47962	7.84051	7.69156	8.30719	7.99687	7.68712	8.17041	7.46308	8.2464	7.95869	8.58973	7.72828
chr17	14000239	14001702	17341061	---		---	ENSMUST00000166481 // ENSEMBL // cdna:known chromosome:NCBIM37:17:14137246:14138709:-1		3.50833	3.60341	3.57315	4.01959	3.77088	3.50175	3.40445	3.43177	3.32016	3.95875	3.24377	3.56805	3.61642	3.443	3.5813	4.31019	3.69744	3.20025	3.63402	3.46142	3.56541	3.72095	3.5049	3.65865	3.5717	3.70112	3.32996	3.32355	3.76525	3.93429	3.71324	3.80904	3.60158	3.72607	3.2326	4.06136	3.7275	3.43063	3.97329	3.49702	3.27046
chr17	13948373	13950678	17333461	NM_001122977 // Gm7168 // predicted gene 7168 // 17 A2|17 // 635895 /// ENSMUST00000088	Gm7168	NM_001122977	NM_001122977 // RefSeq // Mus musculus predicted gene 7168 (Gm7168), mRNA. // chr17 //		3.25698	3.32357	3.30045	4.58153	3.22823	3.35244	3.32021	3.214	3.93231	3.91403	3.43917	3.65873	3.56728	3.16799	3.69103	3.26652	3.68801	3.40863	2.98975	3.36388	3.0076	3.47439	3.48646	3.87526	3.17547	3.55471	3.47936	3.28244	3.96189	3.88347	3.63476	3.2873	3.29358	3.63231	3.43286	3.61343	3.1293	3.25671	3.57464	3.29056	3.68755
chr17	24942156	24960636	17342101	ENSMUST00000024981 // Hn1l // hematological and neurological expressed 1-like // 17 A3.	Hn1l	ENSMUST00000024981	ENSMUST00000024981 // ENSEMBL // cdna:known chromosome:NCBIM37:17:25079101:25097581:-1		10.4271	10.3433	10.7551	10.4306	10.4117	10.3484	10.468	10.1232	10.5282	10.5566	10.3042	10.4711	10.4259	10.4351	10.0084	10.4471	10.803	10.177	10.4347	10.5975	10.3938	10.6079	10.2164	10.552	10.4451	10.5003	10.4447	10.2223	10.5962	10.4417	10.3358	10.1785	10.4818	10.6193	10.6829	10.4167	10.0819	10.5854	10.4727	10.3425	10.3798
chr17	21152562	21154088	17333891	ENSMUST00000096981 // Gm7736 // predicted gene 7736 // 17 A3.2|17 // 665662	Gm7736	ENSMUST00000096981	ENSMUST00000096981 // ENSEMBL // cdna:known chromosome:NCBIM37:17:21289526:21291052:1 g		5.67967	5.74435	5.90145	6.41142	6.14954	6.3554	5.92575	6.31472	6.17922	6.0689	6.19028	5.76935	5.89068	5.73542	5.66269	5.67135	5.84495	6.311	5.8967	5.95364	6.36289	6.07411	6.16122	6.26898	6.09117	5.94731	5.54913	6.06465	6.1865	6.1777	5.62526	6.15485	6.01219	5.72481	5.97193	5.86542	5.4553	6.04852	5.80715	5.89191	5.89852
chr17	15519208	15527301	17341205	ENSMUST00000162505 // Tbp // TATA box binding protein // 17 A2|17 8.25 cM // 21374 ///	Tbp	ENSMUST00000162505	ENSMUST00000162505 // ENSEMBL // cdna:known chromosome:NCBIM37:17:15636852:15665343:1 g		8.11966	8.45801	8.42108	8.26274	8.1566	8.14596	8.25221	7.86355	8.33795	8.58298	8.16809	8.07869	8.26773	8.33118	8.11675	8.03466	8.88075	8.20294	8.4193	8.16031	8.14972	8.46556	8.316	8.19705	8.05297	8.48643	8.19499	7.9877	8.35205	7.87419	8.13683	7.9544	8.28991	8.6689	8.28518	8.32086	8.01946	8.30211	8.52041	8.38972	8.20844
chr17	20814495	20815415	17333850	NM_134190 // Vmn1r229 // vomeronasal 1 receptor 229 // 17 A3.2|17 // 171224 /// ENSMUST	Vmn1r229	NM_134190	NM_134190 // RefSeq // Mus musculus vomeronasal 1 receptor 229 (Vmn1r229), mRNA. // chr		3.5191	3.1728	3.74204	3.80633	3.84561	3.33355	3.72501	3.88789	3.65637	4.03246	3.42622	3.61517	3.581	3.16627	3.73639	3.61944	3.61907	3.22041	3.22742	3.67126	3.41	3.37829	3.23283	3.61934	3.27554	3.19805	3.28247	3.43459	3.47349	3.48921	3.39937	3.69868	3.50859	3.74761	3.19074	3.07923	3.09812	3.30903	2.73631	3.75658	3.57568
chr17	34564268	34588543	17336559	NM_010929 // Notch4 // notch 4 // 17 B1|17 18.72 cM // 18132 /// ENSMUST00000015612 //	Notch4	NM_010929	NM_010929 // RefSeq // Mus musculus notch 4 (Notch4), mRNA. // chr17 // 100 // 92 // 23		7.06352	6.99547	6.81808	6.64682	7.41241	6.84833	6.80633	7.19052	6.82952	6.89813	7.12173	7.23888	7.01815	6.98951	7.27447	7.1402	6.99549	7.51294	7.0666	7.57802	6.96571	7.15909	7.17968	6.79443	6.86589	7.2024	6.95279	6.60577	6.84526	6.79489	7.32547	7.03736	7.23111	6.95061	7.16373	7.0976	7.26025	6.91208	7.03928	7.23444	7.09789
chr17	30394825	30396180	17343141	NR_030688 // Gm6402 // ribosomal protein S17 pseudogene // 17 A3.3|17 // 623169	Gm6402	NR_030688	NR_030688 // RefSeq // Mus musculus predicted pseudogene 6402 (Gm6402), non-coding RNA.		5.5509	5.68976	5.72945	5.19396	5.83277	6.11044	6.07554	5.47734	5.84973	5.92939	6.15062	5.42176	6.06802	5.72125	5.3147	5.33327	6.08841	6.00423	5.92901	5.86965	5.97313	6.0869	5.78868	5.66934	6.06967	5.79079	5.73992	5.14531	5.84859	5.87634	5.87209	5.92882	5.72764	5.66087	5.80155	6.04717	5.96496	5.91494	5.99964	5.91182	5.62862
chr17	22039028	22040539	17341390	XM_003689426 // LOC100862544 // sperm motility kinase Y-like // --- // 100862544 /// EN	LOC100862544	XM_003689426	XM_003689426 // RefSeq // PREDICTED: Mus musculus sperm motility kinase Y-like (LOC1008		3.83676	4.41949	3.61775	4.37876	4.41382	3.84013	3.91707	3.81692	3.88719	3.61632	4.11801	3.63784	4.3024	3.93958	4.35558	4.70549	3.72951	3.74951	3.60569	4.30907	3.98329	4.12677	4.17327	4.14181	3.81916	4.16159	3.77936	3.70213	4.29397	3.61893	4.44527	4.18421	3.9112	3.70157	3.8598	4.31985	4.06168	3.83406	3.91585	4.01888	4.14378
chr17	21093172	21094704	17333879	ENSMUST00000169389 // Gm6811 // predicted gene 6811 // 17 A3.2|17 // 627924 /// XM_0030	Gm6811	ENSMUST00000169389	ENSMUST00000169389 // ENSEMBL // cdna:known chromosome:NCBIM37:17:21230136:21231668:1 g		4.80835	5.23497	4.7756	4.73315	4.96894	5.04171	4.82685	4.99178	4.94461	4.87111	4.96424	4.82596	5.22391	4.68535	4.96093	4.38943	4.80546	5.18872	4.86399	4.77751	4.66948	4.70438	5.179	4.63508	4.69757	4.91199	5.13565	4.83767	4.6039	4.65402	5.06531	5.01645	4.86176	4.61454	5.20152	4.82248	5.02673	4.96677	4.9731	5.16104	4.5994
chr17	24886643	24892149	17334474	ENSMUST00000024976 // Spsb3 // splA/ryanodine receptor domain and SOCS box containing 3	Spsb3	ENSMUST00000024976	ENSMUST00000024976 // ENSEMBL // cdna:known chromosome:NCBIM37:17:25024110:25029094:1 g		7.67935	8.36791	8.30136	7.89799	7.62028	8.03562	7.95318	7.1967	7.71619	8.1772	8.01882	7.82996	7.98222	7.66581	7.61646	7.82559	8.41164	7.99663	8.08539	7.76188	7.6407	8.10706	7.86161	7.8874	7.37781	7.76647	7.52456	7.56089	7.67988	7.28044	7.8703	7.71006	8.06412	7.97539	7.82334	7.90851	7.71289	7.99165	8.04227	8.06057	7.90614
chr17	7363712	7385305	17340657	NM_001142539 // Gm9992 // predicted gene 9992 // 17 A1|17 // 667055 /// ENSMUST00000070	Gm9992	NM_001142539	NM_001142539 // RefSeq // Mus musculus predicted gene 9992 (Gm9992), mRNA. // chr17 //		8.04428	7.87283	7.35533	7.92446	8.09334	8.15208	7.85039	8.13	7.73166	8.021	8.36736	8.03773	8.17976	8.07504	7.3271	7.87973	8.10837	8.43598	7.88535	7.72246	8.29834	7.92681	8.45964	8.27928	7.95424	7.82235	8.00533	8.25774	8.07954	7.98227	7.97769	8.19287	7.69914	7.74266	7.5195	7.89235	7.7167	8.00026	7.78805	7.57268	7.5419
chr17	31844248	31855792	17343263	NM_010831 // Sik1 // salt inducible kinase 1 // 17 B1|17 18.18 cM // 17691 /// ENSMUST0	Sik1	NM_010831	NM_010831 // RefSeq // Mus musculus salt inducible kinase 1 (Sik1), mRNA. // chr17 // 1		8.81668	9.0344	8.49029	8.89126	8.90593	8.9207	9.11456	8.9438	8.74	10.1834	8.41927	9.13225	8.77185	8.7338	10.1007	8.68916	8.85152	9.31414	9.27226	9.14419	8.63865	8.40598	10.5672	8.72184	8.57186	10.1807	8.24624	9.10437	8.65421	8.72083	8.87331	9.95552	9.14086	9.31918	9.20098	8.52978	8.68619	8.98617	8.80227	9.08223	8.56202
chr17	12584189	12628488	17333292	NM_013667 // Slc22a2 // solute carrier family 22 (organic cation transporter), member 2	Slc22a2	NM_013667	NM_013667 // RefSeq // Mus musculus solute carrier family 22 (organic cation transporte		4.31284	3.90848	4.08695	4.42848	4.33857	4.39538	4.42116	4.38986	4.12511	3.58072	3.96275	4.0599	4.6409	4.23047	4.2389	3.72634	4.10006	4.0573	3.9313	3.72351	3.70818	3.94396	3.89171	3.68369	4.01176	4.0764	3.953	3.92157	4.37288	4.43507	3.7683	4.33137	4.27255	4.10751	4.40261	4.33505	4.06939	4.09191	3.62535	4.10902	3.75218
chr17	35956819	35969761	17344511	NM_013854 // Abcf1 // ATP-binding cassette, sub-family F (GCN20), member 1 // 17 B1|17	Abcf1	NM_013854	NM_013854 // RefSeq // Mus musculus ATP-binding cassette, sub-family F (GCN20), member		8.78529	8.63935	8.64664	8.73528	8.59772	8.84206	8.68079	8.77121	8.9678	8.7176	8.74749	8.79265	8.93213	8.47288	9.30335	8.78533	9.07993	8.86828	8.89223	8.84596	8.8968	8.84979	8.64684	9.10926	8.53931	8.51547	8.67483	8.51777	8.65238	8.85925	8.98055	8.37666	8.92359	8.8882	8.46252	9.19431	8.53776	8.63283	8.99877	8.76752	8.54091
chr17	17830188	17830257	17333705	NR_029536 // Mir99b // microRNA 99b // 17|17 // 387230	Mir99b	NR_029536	NR_029536 // RefSeq // Mus musculus microRNA 99b (Mir99b), microRNA. // chr17 // 100 //		7.9722	7.95609	7.89408	7.92249	8.22771	8.62053	8.17157	8.4348	7.75116	7.92712	8.56075	7.88307	8.10859	7.77683	7.65384	8.03686	8.04282	7.86355	8.041	8.24102	7.81758	7.78171	8.35529	7.80289	7.84942	7.85629	7.941	7.85931	8.16585	7.9225	7.74189	8.28033	8.25092	7.94093	8.26516	7.64498	7.97496	7.91282	7.89458	8.04622	7.53305
chr17	26948056	26948119	17342674	NR_037244 // Mir3083 // microRNA 3083 // --- // 100526534	Mir3083	NR_037244	NR_037244 // RefSeq // Mus musculus microRNA 3083 (Mir3083), microRNA. // chr17 // 100		5.10383	5.02837	5.65783	6.23554	5.2245	5.46361	5.77339	4.63676	5.87366	5.33529	5.17981	5.28055	5.1276	5.87003	5.46583	5.70095	4.95443	4.97596	5.63969	5.11169	4.69852	5.13157	4.82492	5.19599	5.59014	5.38095	5.52927	5.20603	5.02937	5.61151	5.39218	5.30622	5.51682	5.27034	4.62205	5.54789	4.71488	5.47546	4.9566	4.70984	5.24434
chr17	35667730	35673739	17344387	ENSMUST00000001565 // Gtf2h4 // general transcription factor II H, polypeptide 4 // 17	Gtf2h4	ENSMUST00000001565	ENSMUST00000001565 // ENSEMBL // cdna:known chromosome:NCBIM37:17:35804675:35810684:-1		7.91628	8.25562	8.42698	8.26569	7.99827	8.13541	8.07352	7.52381	8.26396	8.1374	8.24528	8.29816	8.1572	7.87703	8.49486	7.73613	8.23915	7.53451	8.18634	8.43696	7.82553	8.51094	8.13823	8.08917	7.98018	8.23687	8.19549	7.52066	8.32073	7.62953	7.91536	7.26187	8.24854	8.05254	7.45743	8.18487	7.70736	8.0367	8.57718	8.52972	8.18976
chr17	34199315	34205449	17343801	---		---	ENSMUST00000172796 // ENSEMBL // cdna:known chromosome:NCBIM37:17:34336972:34342394:-1		5.06808	5.00122	4.87308	4.77289	5.21579	5.15634	5.22017	5.11566	4.9536	5.0929	5.12294	4.97483	4.84278	5.03729	5.46233	4.84401	5.04452	5.28513	5.0178	4.90179	4.91391	5.16247	5.03093	5.01244	4.77522	4.91462	5.00424	5.01867	4.92378	5.07526	4.98737	4.92339	4.98644	5.03989	4.88103	4.80234	4.819	5.25194	4.88926	4.85824	4.86495
chr17	20570362	20571198	17333844	---		---	ENSMUST00000095633 // ENSEMBL // cdna:known chromosome:NCBIM37:17:20707326:20708162:1 g		5.75079	5.27877	5.53184	5.49694	5.51749	5.56981	5.07788	5.40574	5.69408	4.56475	5.438	5.29887	5.12787	5.36101	5.38504	4.26193	5.50874	5.29613	5.4653	5.32151	5.06602	5.91149	5.39083	5.47064	5.43653	5.66018	5.64393	5.52674	5.52703	5.38752	5.68009	5.68812	5.36687	5.35589	5.40875	5.24711	6.16632	5.2843	5.2725	5.4282	5.50012
chr17	18424104	18452324	17333769	NM_001102581 // Vmn2r95 // vomeronasal 2, receptor 95 // 17 A3.2|17 // 328759 /// ENSMU	Vmn2r95	NM_001102581	NM_001102581 // RefSeq // Mus musculus vomeronasal 2, receptor 95 (Vmn2r95), mRNA. // c		3.74896	3.66138	3.54969	4.46266	3.59004	3.28786	3.44667	4.08422	3.80345	3.70713	3.52467	3.21756	3.50194	3.41606	4.06512	3.95666	3.40044	3.68775	3.51714	3.57838	3.43701	3.31286	3.39473	3.30669	3.29187	3.27664	3.52747	3.92852	3.19911	3.12218	3.66833	3.7647	3.26235	3.85082	3.59406	3.19017	3.38526	4.21028	3.4877	4.15778	3.68062
[truncated: 60 more rows]
[truncated: 88 more columns]
